# Supplementary material
Source: PubMed Central journal article supplement (PMC9843700)
Supplement: NIHMS1831774-supplement-SD2.pdf [file NIHMS1831774-supplement-SD2.pdf]

Secondary experimental confirmation results of model predicted anti-SARS-CoV-2 compounds.

| Sample ID       | Sample Name           | Structure       | CPE AC50 (uM) | CPE Efficacy (%) | Cell Viabili |
|-----------------|-----------------------|-----------------|---------------|------------------|--------------|
| MLS000699212-03 |                       | CC1=CC=CC\C     | 0.501187      | 95.328           | 14.12538     |
| NCGC00100647-01 |                       | CC1=CC(=CC=C    | 0.794328      | 92.738           | 11.22019     |
| MLS000703078-02 |                       | C1CN(CCO1)C2    | 1.778279      | 118.473          | inactive     |
| NCGC00024633-08 | AMI-193               | FC1=CC=C(OCC    | 2.511886      | 80.432           | inactive     |
| NCGC00273535-01 |                       | C1C1=CC(=CC=C   | 3.162278      | 87.546           | inactive     |
| NCGC00160483-02 | Ftormetazine          | CN1CCN(CC1)C    | 3.548134      | 63.682           | 11.22019     |
| NCGC00100453-02 |                       | COC1=CC=C(C1    | 3.981072      | 44.168           | 11.22019     |
| NCGC00602255-01 | Prenylamine           | CC(CC1=CC=CC    | 3.981072      | 72.644           | 11.22019     |
| NCGC00073791-02 | BEPP monohydroch      | OC(COC1=CC=C    | 3.981072      | 33.036           | 14.12538     |
| NCGC00104248-01 |                       | CCN(CC)C1=CC    | 3.981072      | 88.434           | 10           |
| NCGC00165907-04 | Triparanol            | CCN(CC)CCOC1    | 3.981072      | 70.775           | 8.912509     |
| NCGC00102295-02 |                       | CCN(CC)CCN1C    | 3.981072      | 105.087          | 12.58925     |
| NCGC00015759-05 | Octoclothepine mal    | O=C(O)/C=C\C(   | 4.466836      | 42.12            | 12.58925     |
| NCGC00024655-02 | Metaphit              | S=C=NC1=CC=C    | 4.466836      | 40.731           | inactive     |
| NCGC00015587-04 | L-703,606 oxalate sa  | IC1=C(CNC2C3    | 4.466836      | 101.544          | 12.58925     |
| NCGC00347348-01 |                       | C[C@H]1C[C      | 5.011872      | 81.89            | inactive     |
| NCGC00164483-03 | Amindocate            | CN(C)CCOC(=O    | 5.011872      | 23.936           | inactive     |
| NCGC00108974-01 |                       | CCN(CC)CCOC(    | 7.943282      | 115.266          | inactive     |
| MLS000541553-02 |                       | CN(C)C1=NC(=I   | 7.943282      | 80.288           | 3.162278     |
| NCGC00183805-01 |                       | CN1CCN(CC1)C    | 7.943282      | 46.329           | 11.22019     |
| NCGC00015490-03 | Hexahydro-sila-difer  | O[Si](CCCN1CC   | 10            | 101.37           | inactive     |
| NCGC00179625-05 | Thiopropazine din     | CN(C)[S+](O-)]( | 10            | 90.577           | inactive     |
| NCGC00168047-01 |                       | CN(C)CCCN1C2    | 10            | 87.669           | inactive     |
| NCGC00595011-01 |                       | CCOC1=CC=C(N    | 10            | 116.452          | inactive     |
| NCGC00108226-01 |                       | CCC1=C(NC2=N    | 10            | 87.989           | inactive     |
| NCGC00092383-04 | AMN082                | C(CNC(C1=CC=    | 10            | 81.521           | inactive     |
| NCGC00379305-01 |                       | CC(NC1=C2C=C    | 10            | 49.227           | 14.12538     |
| NCGC00015591-05 | L-741,626             | OC1(CCN(CC1)    | 10            | 67.961           | inactive     |
| NCGC00104278-01 |                       | CCN(CC)C1=NC    | 10            | 45.41            | 12.58925     |
| NCGC00098573-01 |                       | CC[N]1C2=C(C-   | 10            | 73.16            | inactive     |
| NCGC00674557-01 |                       | CC(C)NCC(O)C1   | 10            | 72.758           | 12.58925     |
| NCGC00025187-05 | Rimcazole             | C[C@H]1CN1      | 11.220185     | 96.025           | inactive     |
| NCGC00390051-01 |                       | C[C@H](NC1=C    | 11.220185     | 95.197           | inactive     |
| NCGC00605328-01 |                       | CC1=C(C)C2=C1   | 11.220185     | 65.729           | inactive     |
| NCGC00060290-02 |                       | CCN1CCN(CCC     | 11.220185     | 69.658           | 14.12538     |
| NCGC00162169-02 | S-(-)-Eticlopride hyd | CCN1CC[C@@      | 11.220185     | 38.082           | inactive     |
| NCGC00108774-01 |                       | CCCN(CCC)CCN    | 11.220185     | 97.657           | inactive     |
| NCGC00118583-01 |                       | CN1CCN(CC1)C    | 11.220185     | 92.638           | inactive     |
| NCGC00059062-04 |                       | C1CCN(C1)C2=    | 11.220185     | 37.215           | inactive     |
| MLS000711217-02 |                       | Cl.C1C1=CC=C1   | 11.220185     | 95.319           | inactive     |
| NCGC00162079-02 | Chlorprothixene hyc   | CN(C)CC\C=C/1   | 11.220185     | 81.693           | inactive     |
| NCGC00106614-01 |                       | BrC1=CC(=CC=C   | 12.589254     | 25.629           | inactive     |
| NCGC00610088-01 |                       | COC1=C(OC)C=    | 12.589254     | 28.849           | inactive     |
| NCGC00127260-01 |                       | CN(C)CCN(CC1    | 12.589254     | 92.099           | inactive     |
| NCGC00015799-04 | SKF-525A hydrochlc    | CCCC(C(=O)OC    | 12.589254     | 95.895           | inactive     |

|                 |                       |                 |           |         |          |
|-----------------|-----------------------|-----------------|-----------|---------|----------|
| NCGC00126980-01 |                       | CN(C)CCN(CC1    | 12.589254 | 92.087  | inactive |
| NCGC00015957-06 | Zolantidine dimalea   | O=C(O)/C=C\C(   | 12.589254 | 94.354  | inactive |
| NCGC00107855-01 |                       | CCCC/1=N/C2=    | 12.589254 | 108.807 | inactive |
| NCGC00106835-01 |                       | FC1=CC=C(C=C    | 12.589254 | 71.313  | inactive |
| NCGC00123932-01 |                       | CCN1CCC(CC1     | 12.589254 | 106.977 | inactive |
| NCGC00015180-04 | CGS 12066B            | CN1CCN(CC1)(    | 12.589254 | 99.389  | inactive |
| NCGC00117714-01 |                       | CC1=CC=C(CN2    | 12.589254 | 91.358  | inactive |
| NCGC00108198-02 |                       | COC1=CC(=C(N    | 12.589254 | 99.412  | inactive |
| NCGC00117690-01 |                       | CC1=CC=C(CN2    | 12.589254 | 81.323  | inactive |
| NCGC00052917-03 | Importazole           | CC(NC1=NC(=N    | 12.589254 | 109.817 | inactive |
| NCGC00183145-01 |                       | COC1=CC=C(C=    | 12.589254 | 103.865 | inactive |
| NCGC00024872-03 | 3alpha-Bis-(4-fluoro  | CN1C2CCC1CC     | 12.589254 | 101.169 | inactive |
| NCGC00160412-04 | Indocate              | CN(C)CCOC(=O    | 12.589254 | 110.393 | inactive |
| NCGC00167817-03 | Bucindolol            | CC(C)(CC1=CN(   | 12.589254 | 71.359  | inactive |
| NCGC00686309-02 |                       | OC(COC(C1=CC    | 12.589254 | 115.824 | inactive |
| NCGC00102299-02 |                       | CCCCN1C(=N)\N   | 12.589254 | 85.298  | inactive |
| NCGC00024625-03 | BD 1008 dihydrobrc    | CN(CCN1CCCC     | 12.589254 | 85.984  | inactive |
| MLS001072189-02 |                       | CCCN1N=CC(Cl    | 12.589254 | 96.201  | inactive |
| NCGC00015484-05 | GBR-12935             | C(CN1CCN(CCC    | 12.589254 | 71.884  | 14.12538 |
| NCGC00118549-01 |                       | CN1CCN(CC1)(    | 12.589254 | 77.158  | inactive |
| NCGC00111284-01 |                       | C1C1=CC=C(CN    | 12.589254 | 97.547  | inactive |
| NCGC00099280-01 |                       | CCN(CC)CCN\1    | 12.589254 | 63.47   | inactive |
| NCGC00598531-01 |                       | CC1=CC=C(OCC    | 12.589254 | 99.61   | inactive |
| NCGC00108148-01 |                       | CN(C)CCNC(=O    | 12.589254 | 102.944 | inactive |
| NCGC00127044-01 |                       | COC1=CC=CC(=    | 12.589254 | 97.12   | inactive |
| NCGC00099905-01 |                       | CCOC1=C(CN(C    | 12.589254 | 46.731  | inactive |
| NCGC00160480-01 | Pecazine              | CN1CCCC(C1)C    | 12.589254 | 106.561 | inactive |
| NCGC00167818-02 | UCL 2077              | C(NC(C1=CC=C    | 14.125375 | 33.967  | 12.58925 |
| NCGC00486018-01 | Alimemazine D6        | CC(CN(C([2H])(  | 14.125375 | 31.845  | inactive |
| NCGC00108931-01 |                       | CN1C(=O)\C=C(   | 14.125375 | 33      | inactive |
| NCGC00103768-01 |                       | FC1=CC=C(C=C    | 14.125375 | 31.276  | inactive |
| NCGC00141157-01 |                       | CC1=NOC(\C=C    | 14.125375 | 102.736 | inactive |
| NCGC00015171-05 | BP 897                | COC1=C(C=CC=    | 14.125375 | 36.082  | inactive |
| NCGC00610713-01 |                       | FC1=CC=C(C=C    | 14.125375 | 37.629  | inactive |
| NCGC00117963-01 |                       | C[N]1N=NN=C1    | 14.125375 | 67.415  | inactive |
| NCGC00598560-01 |                       | CC1=CC=C(C=C    | 14.125375 | 34.993  | inactive |
| NCGC00167765-03 | LP 44                 | CSC1=C(C=CC=    | 14.125375 | 102.39  | inactive |
| NCGC00480833-01 | MDL-72222             | CN1[C@@H]2(     | 14.125375 | 113.489 | inactive |
| NCGC00164077-02 | 4-Aminoazobenzene     | Nc2ccc(/N=N/c   | 25.118864 | 65.192  | inactive |
| NCGC00255599-01 | Oxycarboxin           | CC=1OCCS(=O)    | 28.183829 | 68.511  | 31.62278 |
| NCGC00163815-04 | Oryzalin              | O=S(N)(=O)c1c   | inactive  | 0       | inactive |
| NCGC00186032-01 | LP 12 hydrochloride   | O=C(CCCCN1(     | inactive  | 0       | 14.12538 |
| NCGC00117931-01 |                       | C[N]1N=NN=C1    | inactive  | 0       | inactive |
| NCGC00632056-01 |                       | CC1=CC=C(OC2    | inactive  | 0       | 14.12538 |
| NCGC00600997-01 |                       | CCN1CCN(CC1     | inactive  | 0       | inactive |
| NCGC00015983-04 | Trifluoperidol hydroc | Cl.FC(F)(F)c1cc | inactive  | 0       | inactive |
| NCGC00166070-02 | Decominol hydroch     | Cl.OC(COCCCC    | inactive  | 0       | 14.12538 |
| NCGC00014998-03 | TMB-8                 | CCN(CC)CCCC     | inactive  | 0       | 11.22019 |

NCGC00160646-01 Pipofezine

CN1CCN(CC1)c inactive

0 inactive

---

---

**Cell Viabili SI**

|          |          |
|----------|----------|
| -54.809  | 28.18384 |
| -42.969  | 14.12538 |
| 0        | 56.23415 |
| 0        | 39.81072 |
| 0        | 31.62277 |
| -30.457  | 3.162278 |
| -43.869  | 2.818383 |
| -34.45   | 2.818383 |
| -36.751  | 3.548134 |
| -75.212  | 2.511886 |
| -111.783 | 2.238721 |
| -46.395  | 3.162277 |
| -100.735 | 2.818383 |
| 0        | 22.38721 |
| -107.971 | 2.818383 |
| 0        | 19.95262 |
| 0        | 19.95262 |
| 0        | 12.58925 |
| -60.287  | 0.398107 |
| -63.366  | 1.412538 |
| 0        | 10       |
| 0        | 10       |
| 0        | 10       |
| 0        | 10       |
| 0        | 10       |
| 0        | 10       |
| -56.099  | 1.412538 |
| 0        | 10       |
| -59.401  | 1.258925 |
| 0        | 10       |
| -34.744  | 1.258925 |
| 0        | 8.912509 |
| 0        | 8.912509 |
| 0        | 8.912509 |
| -33.037  | 1.258925 |
| 0        | 8.912509 |
| 0        | 8.912509 |
| 0        | 8.912509 |
| 0        | 8.912509 |
| 0        | 8.912509 |
| 0        | 8.912509 |
| 0        | 7.943282 |
| 0        | 7.943282 |
| 0        | 7.943282 |
| 0        | 7.943282 |



0 N/A

---

Mechanistic assay results of experimental confirmed anti-SARS-CoV-2 compounds.

| Sample ID       | Sample Name                     | Structure                     | 3CLpro AC50 (uM) | 3CLpro Efficacy (%) |
|-----------------|---------------------------------|-------------------------------|------------------|---------------------|
| MLS000699212-03 |                                 | <chem>CC1=CC=CC\C</chem>      | inactive         | inactive            |
| NCGC00100647-01 |                                 | <chem>CC1=CC(=CC=C</chem>     | inactive         | inactive            |
| MLS000703078-02 |                                 | <chem>C1CN(CCO1)C2</chem>     | inactive         | inactive            |
| NCGC00024633-08 | AMI-193                         | <chem>FC1=CC=C(OCC</chem>     | inactive         | inactive            |
| NCGC00273535-01 |                                 | <chem>ClC1=CC(=CC=C</chem>    | inactive         | inactive            |
| NCGC00160483-02 | Ftormetazine                    | <chem>CN1CCN(CC1)C</chem>     | inactive         | inactive            |
| NCGC00100453-02 |                                 | <chem>COC1=CC=C(Cl</chem>     | inactive         | inactive            |
| NCGC00602255-01 | Prenylamine                     | <chem>CC(CC1=CC=CC</chem>     | inactive         | inactive            |
| NCGC00073791-02 | BEPP monohydrochloride          | <chem>OC(COC1=CC=C</chem>     | inactive         | inactive            |
| NCGC00104248-01 |                                 | <chem>CCN(CC)C1=CC</chem>     | inactive         | inactive            |
| NCGC00165907-04 | Triparanol                      | <chem>CCN(CC)CCOC1</chem>     | inactive         | inactive            |
| NCGC00102295-02 |                                 | <chem>CCN(CC)CCN1C</chem>     | inactive         | inactive            |
| NCGC00015759-05 | Octoclotheptine maleate         | <chem>O=C(O)/C=C\C</chem>     | inactive         | inactive            |
| NCGC00024655-02 | Metaphit                        | <chem>S=C=NC1=CC=C</chem>     | inactive         | inactive            |
| NCGC00015587-04 | L-703,606 oxalate salt          | <chem>IC1=C(CNC2C3</chem>     | 8.627517433      | -28.1159853         |
| NCGC00347348-01 |                                 | <chem>C[C@@H]1C[C</chem>      | inactive         | inactive            |
| NCGC00164483-03 | Amindocate                      | <chem>CN(C)CCOC(=O</chem>     | inactive         | inactive            |
| NCGC00108974-01 |                                 | <chem>CCN(CC)CCOC(</chem>     | inactive         | inactive            |
| MLS000541553-02 |                                 | <chem>CN(C)C1=NC(=I</chem>    | inactive         | inactive            |
| NCGC00183805-01 |                                 | <chem>CN1CCN(CC1)C</chem>     | inactive         | inactive            |
| NCGC00015490-03 | Hexahydro-sila-difeniramine     | <chem>O[Si](CCCN1CC</chem>    | inactive         | inactive            |
| NCGC00179625-05 | Thiopropazine dimesylate        | <chem>CN(C)[S+](([O-])</chem> | inactive         | inactive            |
| NCGC00168047-01 |                                 | <chem>CN(C)CCCN1C2</chem>     | inactive         | inactive            |
| NCGC00595011-01 |                                 | <chem>CCOC1=CC=C(N</chem>     | inactive         | inactive            |
| NCGC00108226-01 |                                 | <chem>CCC1=C(NC2=N</chem>     | inactive         | inactive            |
| NCGC00092383-04 | AMN082                          | <chem>C(CNC(C1=CC=C</chem>    | inactive         | inactive            |
| NCGC00379305-01 |                                 | <chem>CC(NC1=C2C=C</chem>     | inactive         | inactive            |
| NCGC00015591-05 | L-741,626                       | <chem>OC1(CCN(CC1)</chem>     | inactive         | inactive            |
| NCGC00104278-01 |                                 | <chem>CCN(CC)C1=NC</chem>     | inactive         | inactive            |
| NCGC00098573-01 |                                 | <chem>CC[N]1C2=C(C-</chem>    | inactive         | inactive            |
| NCGC00674557-01 |                                 | <chem>CC(C)NCC(O)Cl</chem>    | inactive         | inactive            |
| NCGC00025187-05 | Rimcazole                       | <chem>C[C@@H]1CN(C</chem>     | inactive         | inactive            |
| NCGC00390051-01 |                                 | <chem>C[C@H](NC1=C</chem>     | inactive         | inactive            |
| NCGC00605328-01 |                                 | <chem>CC1=C(C)C2=C</chem>     | inactive         | inactive            |
| NCGC00060290-02 |                                 | <chem>CCN1CCN(CCC</chem>      | inactive         | inactive            |
| NCGC00162169-02 | S-(-)-Eticlopride hydrochloride | <chem>CCN1CC[C@@</chem>       | inactive         | inactive            |
| NCGC00108774-01 |                                 | <chem>CCCN(CCC)CCN</chem>     | inactive         | inactive            |
| NCGC00118583-01 |                                 | <chem>CN1CCN(CC1)C</chem>     | inactive         | inactive            |
| NCGC00059062-04 |                                 | <chem>C1CCN(C1)C2=</chem>     | inactive         | inactive            |
| MLS000711217-02 |                                 | <chem>Cl.C1C1=CC=C(I</chem>   | inactive         | inactive            |
| NCGC00162079-02 | Chlorprothixene hydrochloride   | <chem>CN(C)CC\C=C/1</chem>    | inactive         | inactive            |
| NCGC00106614-01 |                                 | <chem>BrC1=CC(=CC=C</chem>    | inactive         | inactive            |
| NCGC00610088-01 |                                 | <chem>COC1=C(OC)C=</chem>     | inactive         | inactive            |
| NCGC00127260-01 |                                 | <chem>CN(C)CCN(CC1</chem>     | inactive         | inactive            |
| NCGC00015799-04 | SKF-525A hydrochloride          | <chem>CCCC(C(=O)OC</chem>     | inactive         | inactive            |

|                 |                        |                |             |              |
|-----------------|------------------------|----------------|-------------|--------------|
| NCGC00126980-01 |                        | CN(C)CCN(CC1   | inactive    | inactive     |
| NCGC00015957-06 | Zolantidine dimaleate  | O=C(O)/C=C\C(  | inactive    | inactive     |
| NCGC00107855-01 |                        | CCCC/1=N/C2=   | inactive    | inactive     |
| NCGC00106835-01 |                        | FC1=CC=C(C=C   | inactive    | inactive     |
| NCGC00123932-01 |                        | CCN1CCC(CC1)   | inactive    | inactive     |
| NCGC00015180-04 | CGS 12066B             | CN1CCN(CC1)(   | inactive    | inactive     |
| NCGC00117714-01 |                        | CC1=CC=C(CN2   | inactive    | inactive     |
| NCGC00108198-02 |                        | COC1=CC=C(N    | inactive    | inactive     |
| NCGC00117690-01 |                        | CC1=CC=C(CN2   | inactive    | inactive     |
| NCGC00052917-03 | Importazole            | CC(NC1=NC(=N   | inactive    | inactive     |
| NCGC00183145-01 |                        | COC1=CC=C(C=   | inactive    | inactive     |
| NCGC00024872-03 | 3alpha-Bis-(4-fluoropl | CN1C2CCC1CC    | inactive    | inactive     |
| NCGC00160412-04 | Indocate               | CN(C)CCOC(=O   | inactive    | inactive     |
| NCGC00167817-03 | Bucindolol             | CC(C)(CC1=CN(  | inactive    | inactive     |
| NCGC00686309-02 |                        | OC(COC(C1=CC   | inactive    | inactive     |
| NCGC00102299-02 |                        | CCCCN1C(=N)N   | inactive    | inactive     |
| NCGC00024625-03 | BD 1008 dihydrobron    | CN(CCN1CCCC    | inactive    | inactive     |
| MLS001072189-02 |                        | CCCN1N=CC(Cl   | inactive    | inactive     |
| NCGC00015484-05 | GBR-12935              | C(CN1CCN(CC(   | inactive    | inactive     |
| NCGC00118549-01 |                        | CN1CCN(CC1)(   | inactive    | inactive     |
| NCGC00111284-01 |                        | C1C1=CC=C(CN   | inactive    | inactive     |
| NCGC00099280-01 |                        | CCN(CC)CCN\1   | inactive    | inactive     |
| NCGC00598531-01 |                        | CC1=CC=C(OCC   | inactive    | inactive     |
| NCGC00108148-01 |                        | CN(C)CCNC(=O   | inactive    | inactive     |
| NCGC00127044-01 |                        | COC1=CC=CC(=   | inactive    | inactive     |
| NCGC00099905-01 |                        | CCOC1=C(CN(C   | inactive    | inactive     |
| NCGC00160480-01 | Pecazine               | CN1CCCC(C1)C   | inactive    | inactive     |
| NCGC00167818-02 | UCL 2077               | C(NC(C1=CC=C   | inactive    | inactive     |
| NCGC00486018-01 | Alimemazine D6         | CC(CN(C([2H])) | inactive    | inactive     |
| NCGC00108931-01 |                        | CN1C(=O)\C=C   | inactive    | inactive     |
| NCGC00103768-01 |                        | FC1=CC=C(C=C   | inactive    | inactive     |
| NCGC00141157-01 |                        | CC1=NOC\C=C    | inactive    | inactive     |
| NCGC00015171-05 | BP 897                 | COC1=C(C=CC=   | inactive    | inactive     |
| NCGC00610713-01 |                        | FC1=CC=C(C=C   | inactive    | inactive     |
| NCGC00117963-01 |                        | C[N]1N=NN=C1   | inactive    | inactive     |
| NCGC00598560-01 |                        | CC1=CC=C(C=C   | inactive    | inactive     |
| NCGC00167765-03 | LP 44                  | CSC1=C(C=CC=   | inactive    | inactive     |
| NCGC00480833-01 | MDL-72222              | CN1[C@@H]2(    | inactive    | inactive     |
| NCGC00164077-02 | 4-Aminoazobenzene      | Nc2ccc(/N=N/c  | 55.86268942 | -27.39989937 |
| NCGC00255599-01 | Oxycarboxin            | CC=1OCCS(=O)   | inactive    | inactive     |

| <b>3CLpro Counter AC50 (uM)</b> | <b>3CLpro Counter Efficacy (%)</b> | <b>PP AC50 (uM)</b> | <b>PP Efficacy (%)</b> |
|---------------------------------|------------------------------------|---------------------|------------------------|
| inactive                        | inactive                           | 0.591727619         | -129.1456723           |
| inactive                        | inactive                           | 2.575644059         | -88.62753821           |
| inactive                        | inactive                           | 3.524697417         | -83.0582113            |
| inactive                        | inactive                           | 24.31564787         | -89.5752053            |
| inactive                        | inactive                           | 30.61158701         | -57.23711834           |
| inactive                        | inactive                           | 7.689283006         | -86.63514486           |
| inactive                        | inactive                           | 12.77396884         | -108.5878335           |
| inactive                        | inactive                           | 18.23416354         | -95.54888406           |
| inactive                        | inactive                           | 14.48391093         | -89.90583491           |
| inactive                        | inactive                           | 12.90879921         | -90.11073966           |
| inactive                        | inactive                           | 22.95545184         | -103.2854983           |
| inactive                        | inactive                           | 10.25382369         | -119.104277            |
| inactive                        | inactive                           | 17.21416041         | -68.30721098           |
| inactive                        | inactive                           | 12.90879921         | -86.01706975           |
| inactive                        | inactive                           | 9.13872998          | -108.9918706           |
| inactive                        | inactive                           | 11.5049794          | -112.1449351           |
| inactive                        | inactive                           | 20.45906799         | -73.96785998           |
| inactive                        | inactive                           | 21.67134398         | -111.3629656           |
| inactive                        | inactive                           | 9.680233774         | -125.7575335           |
| inactive                        | inactive                           | 2.575644059         | -108.2504849           |
| inactive                        | inactive                           | 24.31564787         | -85.76434756           |
| inactive                        | inactive                           | 21.67134398         | -141.4457884           |
| inactive                        | inactive                           | 27.28260564         | -96.40459306           |
| inactive                        | inactive                           | 24.31564787         | -97.00172756           |
| inactive                        | inactive                           | 19.31460565         | -157.4797692           |
| inactive                        | inactive                           | 20.45906799         | -86.01680338           |
| inactive                        | inactive                           | 6.853080692         | -131.21785             |
| inactive                        | inactive                           | 19.31460565         | -127.0665432           |
| inactive                        | inactive                           | 24.31564787         | -94.97603623           |
| inactive                        | inactive                           | 13.67369365         | -72.3603803            |
| inactive                        | inactive                           | 30.61158701         | -97.42365579           |
| inactive                        | inactive                           | 24.31564787         | -61.67451101           |
| inactive                        | inactive                           | 20.45906799         | -73.09661811           |
| inactive                        | inactive                           | 6.853080692         | -107.2470305           |
| inactive                        | inactive                           | 21.67134398         | -67.81102835           |
| inactive                        | inactive                           | 2.889920166         | -86.85612231           |
| inactive                        | inactive                           | 10.86140094         | -143.7933675           |
| inactive                        | inactive                           | 19.31460565         | -85.15937856           |
| inactive                        | inactive                           | 10.86140094         | -105.942115            |
| inactive                        | inactive                           | 9.13872998          | -120.2702119           |
| inactive                        | inactive                           | 0.544359549         | -103.8162342           |
| inactive                        | inactive                           | 12.90879921         | -67.10604386           |
| inactive                        | inactive                           | 17.21416041         | -94.67205927           |
| inactive                        | inactive                           | 19.31460565         | -61.22758816           |
| inactive                        | inactive                           | 22.95545184         | -121.8387122           |

|          |          |             |              |
|----------|----------|-------------|--------------|
| inactive | inactive | 19.31460565 | -118.7952782 |
| inactive | inactive | 17.21416041 | -61.68557235 |
| inactive | inactive | 19.31460565 | -114.9221638 |
| inactive | inactive | 28.89920165 | -70.37816927 |
| inactive | inactive | 24.31564787 | -83.84157119 |
| inactive | inactive | 21.67134398 | -53.41337222 |
| inactive | inactive | inactive    | inactive     |
| inactive | inactive | 21.67134398 | -88.17791949 |
| inactive | inactive | 3.061158701 | -136.0894367 |
| inactive | inactive | 9.680233774 | -97.77025801 |
| inactive | inactive | 21.67134398 | -99.89974748 |
| inactive | inactive | 12.18669229 | -107.0321117 |
| inactive | inactive | 27.28260564 | -92.630142   |
| inactive | inactive | 27.28260564 | -60.45951112 |
| inactive | inactive | 13.67369365 | -83.83218164 |
| inactive | inactive | 12.18669229 | -102.5553356 |
| inactive | inactive | 8.144901668 | -97.82690637 |
| inactive | inactive | 15.34213661 | -74.562439   |
| inactive | inactive | 30.61158701 | -106.6486186 |
| inactive | inactive | 18.23416353 | -117.8028412 |
| inactive | inactive | 19.31460565 | -91.08870494 |
| inactive | inactive | 9.138729979 | -130.9098251 |
| inactive | inactive | inactive    | inactive     |
| inactive | inactive | 34.34676554 | -58.35858937 |
| inactive | inactive | 27.28260564 | -89.82142962 |
| inactive | inactive | 1.086140094 | -85.78644042 |
| inactive | inactive | 41.89110732 | -88.96184232 |
| inactive | inactive | 24.31564787 | -81.70811588 |
| inactive | inactive | 17.21416041 | -87.80243006 |
| inactive | inactive | 0.45802148  | -52.84256155 |
| inactive | inactive | 27.28260564 | -88.10611939 |
| inactive | inactive | 18.23416354 | -73.3087829  |
| inactive | inactive | 22.95545184 | -78.39597545 |
| inactive | inactive | 27.28260564 | -58.65899866 |
| inactive | inactive | 24.31564787 | -77.31599785 |
| inactive | inactive | 21.67134398 | -104.2419915 |
| inactive | inactive | 16.25121536 | -88.1795839  |
| inactive | inactive | 24.31564787 | -57.77121772 |
| inactive | inactive | inactive    | inactive     |
| inactive | inactive | inactive    | inactive     |

| PP Cell Viability AC50 (uM) | PP Cell Viability Efficacy (%) |
|-----------------------------|--------------------------------|
| 44.37331147                 | -40.9376154                    |
| 19.31460565                 | -69.07044474                   |
| inactive                    | inactive                       |
| inactive                    | inactive                       |
| 43.24001595                 | -71.0319613                    |
| inactive                    | inactive                       |
| 32.08675901                 | -52.37372994                   |
| 34.34676554                 | -52.71727489                   |
| 15.34213661                 | -63.61155029                   |
| 9.680233774                 | -69.7161351                    |
| 43.24001595                 | -125.0234792                   |
| 43.24001595                 | -59.27749801                   |
| 43.24001595                 | -43.87450648                   |
| inactive                    | inactive                       |
| 43.24001595                 | -88.68548768                   |
| inactive                    | inactive                       |
| inactive                    | inactive                       |
| inactive                    | inactive                       |
| 32.42543757                 | -84.51975689                   |
| 24.31564787                 | -90.9478281                    |
| inactive                    | inactive                       |
| inactive                    | inactive                       |
| inactive                    | inactive                       |
| 9.680233774                 | -80.51011986                   |
| 30.61158701                 | -75.48809856                   |
| 7.689283006                 | -55.65218747                   |
| 34.34676554                 | -47.48952292                   |
| inactive                    | inactive                       |
| 27.28260563                 | -44.71696462                   |
| 38.53770478                 | -38.97586027                   |
| inactive                    | inactive                       |
| inactive                    | inactive                       |
| inactive                    | inactive                       |
| 12.18669229                 | -112.4066796                   |
| 21.67134398                 | -58.43221016                   |
| inactive                    | inactive                       |
| 15.34213661                 | -65.91500326                   |
| 32.42543757                 | -39.76563216                   |
| inactive                    | inactive                       |
| 16.25121536                 | -89.69562144                   |
| inactive                    | inactive                       |
| 43.24001595                 | -53.45635873                   |

|          |             |              |
|----------|-------------|--------------|
| inactive | inactive    |              |
|          | 48.51609586 | -46.57583266 |
|          | 34.34676554 | -34.29733309 |
| inactive | inactive    |              |
|          | 15.34213661 | -27.29898173 |
| inactive | inactive    |              |
| inactive | inactive    |              |
| inactive | inactive    |              |
|          | 48.51609586 | -54.64648685 |
| inactive | inactive    |              |
| inactive | inactive    |              |
|          | 30.61158701 | -44.43608457 |
| inactive | inactive    |              |
|          | 43.24001595 | -98.81152504 |
|          | 43.24001595 | -77.79952136 |
|          | 0.034346766 | -21.72146605 |
| inactive | inactive    |              |
|          | 24.31564787 | -34.57534639 |
|          | 21.67134398 | -67.62952432 |
| inactive | inactive    |              |
| inactive | inactive    |              |
|          | 22.95545184 | -79.28587894 |
| inactive | inactive    |              |
|          | 48.51609586 | -47.42659008 |
|          | 21.67134398 | -72.09505211 |
|          | 40.82120735 | -60.27081984 |
| inactive | inactive    |              |
| inactive | inactive    |              |
| inactive | inactive    |              |

| GFP-LC3 (% of positive cells) AC50 (uM) | GFP-LC3 (% of positive cells) Efficacy (%) |
|-----------------------------------------|--------------------------------------------|
| 21.47975174                             | 71.38648446                                |
| 17.27666569                             | 42.621177                                  |
| inactive                                | inactive                                   |
| inactive                                | inactive                                   |
| 34.47147997                             | 96.58843732                                |
| 20.14311333                             | 71.03311665                                |
| 20.7125357                              | 172.2882588                                |
| 20.93115833                             | 76.15799058                                |
| 33.17365034                             | 160.6522536                                |
| 29.56604699                             | 33.39379465                                |
| 24.40393893                             | 141.2443867                                |
| 22.60094488                             | 138.6516554                                |
| 28.45290384                             | 61.32194813                                |
| inactive                                | inactive                                   |
| 10.49042934                             | 86.7751703                                 |
| 17.27666569                             | 122.0980268                                |
| 23.48514591                             | 60.05041415                                |
| 24.87672829                             | 29.81894528                                |
| 15.3978445                              | 29.91273218                                |
| inactive                                | 0                                          |
| 31.92468319                             | 68.70813638                                |
| 19.38473773                             | 155.5991412                                |
| 27.91214823                             | 71.08975421                                |
| 33.17365034                             | 98.83181363                                |
| 20.93115833                             | 47.30086591                                |
| inactive                                | inactive                                   |
| 26.35076712                             | 76.08417062                                |
| 23.48514591                             | 123.4322464                                |
| inactive                                | inactive                                   |
| 21.75003346                             | 128.9448007                                |
| 26.35076712                             | 94.69844888                                |
| 22.17140743                             | 77.66263543                                |
| 20.14311333                             | 31.88090882                                |
| inactive                                | inactive                                   |
| 16.62621004                             | 51.08121872                                |
| inactive                                | 0                                          |
| 22.60094488                             | 50.88530163                                |
| 20.93115833                             | 72.55156251                                |
| inactive                                | inactive                                   |
| 20.93115833                             | 74.7276276                                 |
| inactive                                | 0                                          |
| inactive                                | inactive                                   |
| inactive                                | inactive                                   |
| inactive                                | inactive                                   |
| 29.56604699                             | 42.54234763                                |

|          |             |             |
|----------|-------------|-------------|
|          | 20.93115833 | 40.96543098 |
| inactive |             | 0           |
|          | 29.56604699 | 132.8791707 |
| inactive |             | 0           |
|          | 22.60094488 | 45.95046956 |
|          | 20.93115833 | 69.24086159 |
| inactive |             | 0           |
|          | 18.6549145  | 62.30896691 |
| inactive |             | 0           |
| inactive | inactive    |             |
|          | 31.31794541 | 98.54170437 |
|          | 30.72273886 | 45.94016267 |
| inactive | inactive    |             |
|          | 23.48514591 | 57.07153102 |
|          | 23.48514591 | 55.56736548 |
| inactive | inactive    |             |
|          | 35.1393127  | 97.69611984 |
|          | 17.61137493 | 73.40466717 |
|          | 23.48514591 | 84.24320418 |
|          | 27.91214823 | 47.03068766 |
|          | 20.93115833 | 60.51997839 |
| inactive | inactive    |             |
| inactive | inactive    |             |
| inactive | inactive    |             |
|          | 29.56604699 | 54.40330816 |
| inactive | inactive    |             |
|          | 48.08717428 | 131.6080714 |
| inactive | inactive    |             |
|          | 22.60094488 | 40.12478129 |
| inactive | inactive    |             |
|          | 26.35076712 | 39.96040494 |
| inactive | inactive    |             |
|          | 27.38166983 | 80.09965424 |
| inactive | inactive    |             |
| inactive | inactive    |             |
| inactive | inactive    |             |

| GFP-LC3 (Relative Spot Intensity) AC50 (uM) | GFP-LC3 (Relative Spot Intensity) Efficacy (%) |
|---------------------------------------------|------------------------------------------------|
| 49.96845532                                 | 37.75856693                                    |
| inactive                                    | inactive                                       |
| inactive                                    | inactive                                       |
| inactive                                    | inactive                                       |
| 34.47147997                                 | 97.12194011                                    |
| 31.92468319                                 | 77.24625229                                    |
| 18.46006687                                 | 122.8293871                                    |
| 29.56604699                                 | 68.34561031                                    |
| 33.17365034                                 | 376.0263599                                    |
| inactive                                    | inactive                                       |
| 33.17365034                                 | 321.1323566                                    |
| 23.48514591                                 | 339.6123175                                    |
| 35.1393127                                  | 58.00438638                                    |
| inactive                                    | inactive                                       |
| 14.8181253                                  | 100.5617042                                    |
| 17.61137493                                 | 225.2093524                                    |
| 35.1393127                                  | 37.71633339                                    |
| inactive                                    | inactive                                       |
| inactive                                    | inactive                                       |
| inactive                                    | 0                                              |
| inactive                                    | inactive                                       |
| 26.35076712                                 | 383.9058051                                    |
| 29.56604699                                 | 54.83170296                                    |
| 33.17365034                                 | 95.24669615                                    |
| 26.35076712                                 | 34.25600794                                    |
| inactive                                    | inactive                                       |
| 33.17365034                                 | 72.36853452                                    |
| 31.31794541                                 | 131.2423619                                    |
| inactive                                    | inactive                                       |
| 27.91214823                                 | 299.3882036                                    |
| 31.92468319                                 | 41.74179807                                    |
| 28.45290384                                 | 40.40670797                                    |
| inactive                                    | inactive                                       |
| inactive                                    | inactive                                       |
| inactive                                    | 0                                              |
| inactive                                    | inactive                                       |
| inactive                                    | 0                                              |
| 30.72273886                                 | 61.36505172                                    |
| inactive                                    | inactive                                       |
| 33.17365034                                 | 71.93450272                                    |
| inactive                                    | inactive                                       |

|          |             |          |             |
|----------|-------------|----------|-------------|
| inactive |             | inactive |             |
| inactive |             | inactive |             |
|          | 33.17365034 |          | 217.0147683 |
| inactive |             | inactive |             |
| inactive |             |          | 0           |
|          | 29.56604699 |          | 59.895075   |
| inactive |             | inactive |             |
|          | 27.91214823 |          | 37.16585122 |
| inactive |             | inactive |             |
| inactive |             | inactive |             |
|          | 33.17365034 |          | 96.28907084 |
| inactive |             |          | 0           |
| inactive |             | inactive |             |
|          | 37.22144788 |          | 38.73906766 |
| inactive |             |          | 0           |
| inactive |             | inactive |             |
|          | 35.1393127  |          | 38.17279965 |
|          | 26.35076712 |          | 118.7588638 |
|          | 33.17365034 |          | 55.48829663 |
| inactive |             |          | 0           |
|          | 34.47147997 |          | 34.1102211  |
| inactive |             | inactive |             |
| inactive |             | inactive |             |
| inactive |             | inactive |             |
|          | 37.22144788 |          | 32.57437423 |
| inactive |             | inactive |             |
|          | 67.92493908 |          | 240.0027401 |
| inactive |             | inactive |             |
|          | 33.17365034 |          | 60.46932938 |
| inactive |             | inactive |             |
| inactive |             | inactive |             |
| inactive |             | inactive |             |

| GFP-LC3 (Total Spot Area) AC50 (uM) | GFP-LC3 (Total Spot Area) Efficacy (%) |
|-------------------------------------|----------------------------------------|
| 42.85773919                         | 80.67845706                            |
| 13.98921236                         | 28.90209493                            |
| inactive                            | 0                                      |
| inactive                            | inactive                               |
| 33.17365034                         | 63.50042729                            |
| 26.35076712                         | 62.84549767                            |
| 24.61689482                         | 189.4148204                            |
| 20.93115833                         | 58.33601199                            |
| 33.17365034                         | 190.7579048                            |
| inactive                            | inactive                               |
| 33.17365034                         | 231.4894199                            |
| 26.35076712                         | 170.655599                             |
| 33.17365034                         | 63.60030492                            |
| inactive                            | inactive                               |
| 13.20666808                         | 104.4381663                            |
| 18.6549145                          | 211.0361015                            |
| 30.72273886                         | 43.9530809                             |
| inactive                            | inactive                               |
| inactive                            | inactive                               |
| inactive                            | 0                                      |
| 35.1393127                          | 33.42025803                            |
| 25.35867724                         | 293.1945499                            |
| 29.56604699                         | 44.69880506                            |
| 31.92468319                         | 94.98807163                            |
| 26.35076712                         | 36.81022908                            |
| inactive                            | inactive                               |
| 33.17365034                         | 58.35083391                            |
| 29.56604699                         | 93.67820357                            |
| inactive                            | inactive                               |
| 24.40393893                         | 152.8145523                            |
| 30.72273886                         | 51.42389936                            |
| 26.35076712                         | 62.18082087                            |
| inactive                            | inactive                               |
| inactive                            | inactive                               |
| 33.17365034                         | 43.19148673                            |
| inactive                            | inactive                               |
| 26.35076712                         | 39.27603124                            |
| 25.35867724                         | 38.45127828                            |
| inactive                            | inactive                               |
| 34.47147997                         | 51.12901493                            |
| inactive                            | inactive                               |

|          |             |             |
|----------|-------------|-------------|
| inactive |             | 0           |
| inactive |             | 0           |
|          | 34.47147997 | 158.1491311 |
| inactive | inactive    |             |
| inactive |             | 0           |
|          | 29.56604699 | 45.26472683 |
| inactive | inactive    |             |
|          | 22.17140743 | 38.32262863 |
| inactive |             | 0           |
| inactive | inactive    |             |
|          | 35.1393127  | 106.1502904 |
|          | 35.1393127  | 33.67973482 |
| inactive | inactive    |             |
|          | 29.56604699 | 32.78916392 |
|          | 29.56604699 | 24.79238628 |
| inactive | inactive    |             |
|          | 35.1393127  | 69.24123933 |
|          | 23.48514591 | 100.0801898 |
|          | 31.31794541 | 45.58439373 |
| inactive |             | 0           |
|          | 28.45290384 | 37.73562964 |
| inactive | inactive    |             |
| inactive | inactive    |             |
| inactive | inactive    |             |
|          | 33.17365034 | 34.33026331 |
| inactive | inactive    |             |
|          | 62.90655819 | 190.6764937 |
| inactive | inactive    |             |
|          | 29.56604699 | 79.53040009 |
| inactive | inactive    |             |
| inactive | inactive    |             |
| inactive | inactive    |             |

Secondary experimental confirmation results of model predicted ZIKV NS1 inhibitors.

| Sample ID       | Name               | Structure            | NS-1 IC50 (uM) | NS-1 Efficacy (%) |
|-----------------|--------------------|----------------------|----------------|-------------------|
| NCGC00378623-01 | Dolastatin 10      | CC[C@H](C)[C@H](C)   | 0.001662621    | -123.7609559      |
| NCGC00025125-18 | Colchicine         | CC(=O)N[C@H]2CCc3c   | 0.01250822     | -80.44964471      |
| NCGC00387651-01 | T-2 Toxin          | CC(C)CC(=O)O[C@H]1C  | 0.014260232    | -169.7078916      |
| NCGC00357393-02 | Narciclasine       | O[C@H]1\C=C\C2[C@@   | 0.017952569    | -123.9408855      |
| NCGC00246789-03 |                    | CC1CC(C)(CC(C(O)CC2  | 0.018654914    | -173.5699728      |
| NCGC00179895-03 | Diacetoxyscirpenol | CC(=O)OC[C@]12CC\C   | 0.041763151    | -166.5446006      |
| MLS002702975-01 |                    | COC1=C(OC)C(OC)=C2   | 0.043396752    | -72.08167992      |
| NCGC00022001-13 | Podofilox          | COc1cc(cc(OC)c1OC)[C | 0.04869226     | -130.7486731      |
| MLS002702890-01 |                    | COC1=C(OC)C2=C(CCC   | 0.050596898    | -81.2048446       |
| NCGC00390533-01 | 7-Epi-docetaxel    | CC(=O)O[C@]12CO[C@   | 0.050597213    | -144.8149481      |
| NCGC00071621-03 |                    | COC1=CC=CC=C1C2=N    | 0.079194665    | -115.9823972      |
| NCGC00024379-16 | Emetine            | COc4cc5CCN[C@H](C)C  | 0.284529038    | -158.5526636      |
| NCGC00107023-01 |                    | CC1=C([NH]C2=C1C(=C  | 0.319246832    | -111.2326565      |
| NCGC00107055-01 |                    | COC1=CC(=CC(=C1OC)   | 0.319246832    | -131.373377       |
| NCGC00161928-01 |                    | COC1=CC(=CC(OC)=C1   | 0.351393127    | -99.583209        |
| NCGC00112054-01 |                    | CCCNC(=O)C1=CC\2=C   | 0.468590266    | -142.555562       |
| NCGC00018238-09 | Oxibendazole       | O=C(OC)Nc1nc2cc(ccc  | 0.468590266    | -108.8408382      |
| NCGC00131231-01 |                    | CC(C)(C)C1=CC=C(C=C: | 0.50597213     | -177.4482846      |
| NCGC00161926-01 | beta-PELTATIN      | [H][C@]12COC(=O)[C@  | 0.525766926    | -162.8258892      |
| NCGC00016806-14 | Mebendazole        | COC(=O)NC1=NC2=C([C  | 0.567710067    | -121.2735182      |
| NCGC00130596-01 |                    | CC(C)C/1=N/N\2C(=O), | 0.589920193    | -125.3535929      |
| NCGC00263862-02 | FLOXURIDINE        | OC[C@H]1OC(C[C@H]    | 0.636981172    | -153.3276354      |
| NCGC00119573-01 |                    | CCC1=CC=C(C=C1)[N]2  | 0.661901343    | -178.1237003      |
| NCGC00131197-01 |                    | CC1=CC=CC=C1C(=O)N   | 0.687796449    | -154.7522269      |
| NCGC00165745-01 | Borrelidin         | [H]C1(CCC[C@H]1C(O)  | 0.801911785    | -146.0308237      |
| NCGC00386770-01 | Suprafenacine      | CC1=CC=C(C=C1)/C=N,  | 0.833284421    | -115.3008695      |
| NCGC00255694-01 | Fenbendazole       | O=C(OC)Nc1nc2cc(ccc  | 0.923342       | -137.4792344      |
| NCGC00137609-01 |                    | CC1=CC(=CC=C1)OCC(:  | 0.934954682    | -98.95892744      |
| NCGC00126601-01 |                    | COC1=CC(=C(CCNC2=F   | 0.971538307    | -139.1856329      |
| NCGC00104735-01 |                    | CCOC(=O)C1=C(NC(=O)  | 1.09008391     | -117.9238478      |
| NCGC00131403-01 |                    | COC1=CC=C(CN2CCC3    | 1.132730503    | -129.316064       |
| NCGC00098841-01 |                    | CC(=C)CN\1C(=O)C2=C  | 1.223094263    | -124.7861732      |
| NCGC00112060-01 |                    | CC1=CC=C(C)\2=C1S(   | 1.320666807    | -145.59745        |
| NCGC00118008-01 |                    | COC1=CC=CC(=C1)CNC   | 1.320666807    | -133.6513183      |
| NCGC00100750-01 |                    | CC1=CC=CC(=C1)NC(=   | 1.398921235    | -120.1673267      |
| NCGC00017007-05 | Methiazole         | COC(=O)NC1=NC2=C([C  | 1.408302415    | -102.4945465      |
| NCGC00132685-01 |                    | FC1=CC=CC=C1CN2\C:   | 1.426023215    | -156.91981        |
| NCGC00107639-01 |                    | CCC/1=N/C2=C(SC3=C   | 1.481812529    | -104.2261321      |
| NCGC00108968-01 |                    | COC1=CC(=C(OC)C=C1   | 1.539784449    | -105.5376902      |
| NCGC00131179-01 |                    | COC1=CC(=CC(=C1)OC   | 1.539784449    | -185.5049438      |
| NCGC00115110-01 |                    | COC1=CC=CC=C1N2CC    | 1.539784449    | -137.7581833      |
| NCGC00109656-01 |                    | CC1=CC(=C(C)C=C1)CN  | 1.600024364    | -127.4828157      |
| NCGC00105676-01 |                    | CCCC1=CC(=NO1)C(=O   | 1.727666567    | -144.2052628      |
| NCGC00131199-01 |                    | ClC1=CC=CC=C1C(=O)I  | 1.795256864    | -134.840151       |
| NCGC00139416-01 |                    | CCCC/1=N/C2=C(SC3=   | 1.865491448    | -121.7074214      |

|                 |           |                       |             |              |
|-----------------|-----------|-----------------------|-------------|--------------|
| NCGC00112548-01 |           | COC1=CC(=C(OC)C=C1    | 1.865491448 | -142.6195377 |
| NCGC00112058-01 |           | CC1=CC=C(C)C\2=C1S(   | 1.938473772 | -151.5801759 |
| NCGC00100746-01 |           | COC1=CC(=CC=C1)NC(    | 1.938473772 | -137.5829331 |
| NCGC00104897-01 |           | CCCCC(CC)CNC(=O)C1:   | 2.014311331 | -138.9099153 |
| NCGC00104879-01 |           | COCCN1C(=O)NC2=CC     | 2.014311331 | -123.1009422 |
| NCGC00112544-01 |           | COC1=CC(=C(CCNC(=O    | 2.175003345 | -120.2468603 |
| NCGC00131207-01 |           | FC(F)(F)C1=CC=CC(=C1  | 2.175003345 | -180.4848162 |
| NCGC00118646-01 |           | CCC(CC)C(=O)NC1=CC:   | 2.260094487 | -141.261246  |
| NCGC00131111-02 |           | CN(C1=CC=C(C)C=C1)]!  | 2.260094487 | -104.2458148 |
| NCGC00131201-01 |           | CC(C)OC1=CC=C(C=C1)   | 2.440393891 | -156.8968294 |
| NCGC00117664-01 |           | FC1=CC=C(NC2=NC3=I    | 2.440393891 | -151.496651  |
| NCGC00141977-01 |           | CCC1=NC2=CC(=CC=C:    | 2.535867722 | -133.7493762 |
| NCGC00108525-01 |           | CCOC(=O)C1=CC=C(C=I   | 2.535867722 | -136.3408408 |
| NCGC00103947-01 |           | COC1=CC(=C(C)C=C1N    | 2.535867722 | -124.1896277 |
| NCGC00138165-01 |           | FC1=CC=CC=C1C(=O)N    | 2.535867722 | -127.9025113 |
| NCGC00119579-01 |           | COC1=CC=CC(=C1OC)(    | 2.738166982 | -181.2228729 |
| NCGC00108970-01 |           | COC1=C(NC2=C3CCCC     | 2.845290382 | -110.0633641 |
| NCGC00102074-01 |           | COC1=CC(=C(OC)C=C1    | 2.845290382 | -146.7300199 |
| NCGC00072088-02 |           | O=C(NC1=CC=CN=C1)(    | 2.845290382 | -142.6032945 |
| NCGC00108397-01 |           | C[N]1C=C(CN(C2CCCC    | 2.956604697 | -143.6730953 |
| NCGC00131233-01 |           | CCCCOC1=CC=C(C=C1)    | 2.956604697 | -132.6197915 |
| NCGC00107109-01 |           | CC1=C([NH]C2=C1C(=C   | 3.072273884 | -153.5928677 |
| NCGC00142060-01 |           | CCCC1=C(C(=O)OCC)C:   | 3.317365032 | -121.0091927 |
| NCGC00113159-01 |           | COC(=O)C1=CC2=C(C=I   | 3.317365032 | -119.5013425 |
| NCGC00107103-01 |           | CC(C)OC1=CC=CC(=C1)   | 3.722144786 | -123.8572952 |
| NCGC00138127-01 |           | CN1C(=O)C2=C(SC3=C    | 3.722144786 | -152.4847369 |
| NCGC00114471-01 |           | CC[N]1C(=CC2=C1C3=I   | 3.867763665 | -144.9916556 |
| NCGC00137837-01 |           | COC1=CC=C(OCC(=O)N    | 3.867763665 | -131.1708977 |
| NCGC00182341-01 |           | [O-][S+](=O)(N1CCN(CC | 4.019054486 | -33.71364791 |
| NCGC00102779-01 |           | CCOC1=CC=C(C=C1)N2    | 4.01907949  | -127.836475  |
| NCGC00132979-01 |           | COC1=CC=C(CN2CCC/:    | 4.01907949  | -122.8164819 |
| NCGC00138157-01 |           | CC(=O)NC1=CC=C(C=C:   | 4.176315139 | -133.5362617 |
| NCGC00100556-01 |           | CCOC1=CC=C(C=C1)]S-   | 4.339702209 | -165.5406669 |
| NCGC00126217-01 |           | COC1=CC=C(C=C1)C2N    | 4.509481357 | -154.4172168 |
| NCGC00105670-01 |           | CC(C)C1=CC(=NO1)C(=   | 4.685902657 | -142.6976273 |
| MLS000830213-01 |           | COC1=CC=C(C=C1)C2=    | 4.869195671 | -83.11827179 |
| NCGC00108581-01 |           | CCOC(=O)C1=CC=C(C=I   | 4.869225964 | -123.3721798 |
| NCGC00164807-01 |           | CCN1C2=C(S\C1=N/C(:   | 5.059689824 | -80.63625292 |
| NCGC00389858-01 | DIGITONIN | C[C@@H]1CC[C@@]2      | 5.123388247 | -155.9856398 |
| MLS000100790-01 |           | CC1=CC(=CC=C1)N2N=    | 5.463327401 | -77.06403875 |
| NCGC00255429-01 | Nonoxynol | CCCCCCCCc1ccc(OC(     | 5.46807648  | -130.4130555 |
| NCGC00169957-03 |           | CCC(C)C1NC(=O)C2CC    | 5.53362838  | -189.3506146 |
| NCGC00109606-01 |           | [O-][S+](=O)C2=C(C=C  | 5.899201932 | -133.7940625 |
| NCGC00134651-01 |           | ClC1=CC=C(C=C1)C2N    | 6.129992302 | -125.0640176 |
| NCGC00121687-01 |           | CCOC1=CC=C(C=C1)C2    | 6.248751622 | -126.3098178 |
| NCGC00138099-01 |           | COC1=CC=C(C=C1OC)(    | 6.248751622 | -128.3061623 |
| NCGC00356796-01 |           | CCOC(=O)C1=CC=C(NC    | 6.369811724 | -163.9438553 |
| NCGC00104681-01 |           | COC1=CC=CC(=C1OC)(    | 6.369811724 | -185.1861977 |

|                 |                        |                                                |             |              |
|-----------------|------------------------|------------------------------------------------|-------------|--------------|
| NCGC00131586-01 |                        | CCCCOC1=CC=C(CNC(=O)C1)N                       | 7.426655222 | -130.4886612 |
| NCGC00184875-01 |                        | CC1=CC=C(CNCC2=C(C)N2)C1=O                     | 8.332792371 | -101.9547019 |
| NCGC00246910-02 |                        | OCC1OC(C(O)C1O)[N]2C=CC2                       | 8.332844212 | -146.0509681 |
| NCGC00125691-01 |                        | COC1=CC=C(C[N]2C3=CC(C)C=C3)C1=O               | 8.332844212 | -191.6668462 |
| NCGC00129956-01 |                        | CC(C)C/1=N/N\2C(=O),C1=CC=C(C=C1)C2=CC(=O)C=C2 | 9.349604983 | -181.146835  |
| NCGC00102585-01 |                        | COC1=CC=C(C=C1)C2=CC(=O)C=C2                   | 9.715322627 | -88.02203959 |
| NCGC00239676-01 |                        | CC1=CN=C(SCC2=CC=C(C=C2)C1)N                   | 9.71538307  | -179.0531209 |
| NCGC00141038-01 |                        | COC1=CC=C(C=C1)C(=O)C1=CC=C(C=C1)C1=O          | 9.71538307  | -144.6245406 |
| NCGC00108419-01 |                        | CC[N]1C=C(CN(C2CCC2)C1)N                       | 10.49042933 | -184.753585  |
| NCGC00125689-01 |                        | COC1=CC=C(C[N]2C3=CC(C)C=C3)C1=O               | 10.49042933 | -166.1007499 |
| MLS000564956-01 |                        | ClC1=CC=CC(Cl)=C1CN                            | 10.90077128 | -65.70047881 |
| NCGC00108313-01 |                        | CCOC(=O)C1=CC=C(C=C1)C1=O                      | 11.11202635 | -77.69631941 |
| MLS000579506-01 |                        | CC1=C(C2=C(S1)N=CN=C2)C1=O                     | 11.32723456 | -80.99576574 |
| NCGC00113062-01 |                        | CC1=CC=C(NC(=O)C2=CC(=O)C=C2)C1=O              | 11.32730503 | -128.2572464 |
| NCGC00166344-01 |                        | CCNC1=NC(=NC(=N1)C=C1)N                        | 12.23086654 | -85.38387868 |
| NCGC00187882-01 |                        | C[S+](=[O-])(=O)C1=CC=C(C=C1)N                 | 12.23086654 | -126.9894587 |
| NCGC00106742-02 |                        | CC(C)C1=CC=C(NC2=C(C)N2)C1=O                   | 12.23094263 | -145.0616882 |
| NCGC00114058-01 |                        | CC1=CC(=CC(=C1)NC(=O)C1=CC=C(C=C1)C1=O         | 12.46789863 | -109.6206199 |
| MLS000624892-01 |                        | COC1=C(OCC2=C(Cl)C=CC2)C1=O                    | 12.70936622 | -96.9582229  |
| NCGC00107199-01 |                        | CC1=CC2=C(C=CC=C2)C=C1                         | 12.70944529 | -157.6625989 |
| NCGC00138993-01 |                        | COC1=CC=C(OC)C(=C1)N                           | 12.70944529 | -126.2639584 |
| NCGC00119990-01 |                        | CCN1C(=O)C2=CC=CC=C2N1                         | 13.2065859  | -104.8827046 |
| NCGC00187802-01 |                        | OC1=C2N=CC=CC2=CC=C1                           | 13.2065859  | -89.82070742 |
| NCGC00239467-01 |                        | CSC1=C(C=CC=C1)C(=O)C1=CC=C(C=C1)C1=O          | 13.20666807 | -167.3258365 |
| NCGC00139155-01 |                        | CC1=C(Cl)C=C(C=C1)[N]2C=CC2                    | 13.72325797 | -95.31872525 |
| NCGC00108493-01 |                        | CCOC(=O)C1=CC=C(C=C1)C1=O                      | 13.72334335 | -134.0122437 |
| NCGC00108521-01 |                        | CCOC(=O)C1=CC=C(C=C1)C1=O                      | 13.72334335 | -160.8382455 |
| NCGC00092346-01 | GW 583340 dihydroc     | C[S+](=[O-])(=O)CCNCC1=CC=C(C=C1)N             | 14.26014344 | -57.91807118 |
| NCGC00119375-01 |                        | CN1CCN(CC1)C2=CC=C(C=C2)N1                     | 14.81812529 | -83.38670019 |
| NCGC00239870-01 |                        | COCC(C)NCC1=CC2=C(C)N2C1=O                     | 15.39774869 | -103.8508397 |
| NCGC00100011-01 |                        | CCOC1=C(NC(=O)N2C=CC2)C1=O                     | 15.39784449 | -149.4218168 |
| NCGC00167507-09 | Lapatinib              | C[S+](=[O-])(=O)CCNCC1=CC=C(C=C1)N             | 15.69605676 | -88.49041584 |
| NCGC00354561-04 |                        | CCC1=C(N2\C=C(/C=C2)C=C1)N                     | 16.6261066  | -109.9226859 |
| NCGC00126562-01 |                        | CC1=CC=C(Cl)C=C1N2C=CC2                        | 16.62621003 | -71.33493284 |
| NCGC00099020-01 |                        | CC1=CC=C2N=C3CCCC=C3C=C21                      | 16.62621003 | -145.8565702 |
| NCGC00116349-01 |                        | COC(=O)C1=C(OC2=CC=C(C=C2)C1)N                 | 16.62621003 | -136.3194129 |
| NCGC00139449-01 |                        | COC1=CC=C(C=C1OC)N                             | 16.62621003 | -117.5021542 |
| NCGC00165957-20 | Amlodipine besylate    | CCOC(=O)C/1=C(COCC2=CC=C(C=C2)C1)N             | 16.62621003 | -88.13208559 |
| NCGC00091182-01 | Triglycidyl isocyanura | O=C4N(CC1CO1)C(=O)C=C4                         | 16.62621003 | -149.5240579 |
| NCGC00108317-01 |                        | CCOC(=O)C1=CC=C(C=C1)C1=O                      | 17.27666567 | -173.866854  |
| NCGC00185692-01 |                        | CC1=C(C2=C(C=CC=C2)C=C1)N                      | 18.65479842 | -64.54495119 |
| NCGC00118620-01 |                        | COC1=CC=C(C=C1)C(=O)C1=CC=C(C=C1)C1=O          | 18.65491448 | -158.7556101 |
| NCGC00099684-01 |                        | FC1=CC=C(C=C1)C2=NC=CC=C21                     | 18.65491448 | -174.9156532 |
| NCGC00240223-01 |                        | COC1=CC=CC=C1N2C=CC2                           | 19.76016472 | -90.13719703 |
| NCGC00127015-01 |                        | CC(C)(C)OC(=O)N1CCC=C1                         | 19.76028766 | -172.3868358 |
| NCGC00107641-01 |                        | CCC/1=N/C2=C(SC3=CC=C3)C2=O                    | 19.76028766 | -102.1976023 |
| NCGC00111226-01 |                        | COC1=C(CNC2=NC=NC=C2)C1=O                      | 20.142988   | -80.02678174 |
| NCGC00014374-03 |                        | O[C@@H]1CC2=C(O)C=CC2=C1                       | 20.93102809 | -51.27436981 |

|                 |                          |                       |             |              |
|-----------------|--------------------------|-----------------------|-------------|--------------|
| NCGC00015619-13 | Loratadine               | Clc3cc4CCc1cccnc1Cl   | 20.93115831 | -149.0691478 |
| NCGC00108391-01 |                          | C[N]1C=C(CN(C2CCCC    | 20.93115831 | -119.6808203 |
| NCGC00164437-02 | 2,2-Bis(4-hydroxyphenyl) | OC1=CC=C(C=C1)C(C2=   | 21.4796181  | -30.66542526 |
| NCGC00011767-02 |                          | CC1=CC=CC(=C1)CNC2    | 22.17126948 | -75.56485962 |
| NCGC00167513-14 | Vandetanib               | COC1=CC2=C(NC3=CC     | 22.17140742 | -148.5525376 |
| NCGC00106584-01 |                          | CC1=CC=C(NC(=O)NCC    | 22.60080426 | -67.70271511 |
| NCGC00100979-01 |                          | CC1CCC2=C(C1)SC(=C    | 22.60094487 | -141.5199719 |
| NCGC00182086-01 |                          | C1OC2=CC=C(\C=C/C3    | 23.48499979 | -73.58064035 |
| NCGC00163320-01 | N6-METHYLADENOSIN        | CNC1=C2N=CN([C@@      | 23.48499979 | -94.29593471 |
| NCGC00240089-01 |                          | OC1=C2OCCN(CC3=CC     | 23.48499979 | -94.73112901 |
| NCGC00379019-02 | Calcifediol-D6           | C[C@H](CCCC(C([2H]))  | 23.4851459  | -81.12092973 |
| NCGC00108621-01 |                          | CCOC(=O)C1=CC=C(C=C   | 28.45290382 | -114.2610521 |
| NCGC00138676-01 |                          | COC1=CC=C(C=C1)CSC    | 28.45290382 | -146.8997366 |
| NCGC00104723-01 |                          | CCCC[N]1C(=NC2=C1C    | 29.56604697 | -163.1650487 |
| NCGC00138698-01 |                          | C1C1=CC=CC=C1CSC2=    | 30.72254771 | -65.86643976 |
| NCGC00098192-01 |                          | COC1=CC2=C(C=C1)N=    | 31.92468317 | -90.21293662 |
| NCGC00090749-12 | Diethylstilbestrol       | Oc1ccc(cc1)C(CC)=C(C  | 33.17365032 | -156.2382706 |
| NCGC00254528-01 | 4,4',4''-Ethane-1,1,1-t  | CC(c1ccc(O)cc1)(c2cc  | 34.0429005  | -94.62209675 |
| NCGC00255488-01 | 4,6-Di-tert-butyl-m-cr   | CC(C)(C)c1cc(c(C)cc1C | 48.08687508 | -106.1390135 |
| NCGC00108810-01 |                          | COC1=CC(=C(OC)C=C1    | inactive    | 0            |
| NCGC00103968-01 |                          | FC1=CC2=C(NC(=O)CN    | inactive    | -56.08529442 |
| NCGC00139105-01 |                          | C1C1=CC=C(CCN2=NC     | inactive    | 0            |
| NCGC00187697-01 |                          | COC1=CC=C(C=C1)C2=    | inactive    | -39.76590134 |
| NCGC00164910-01 |                          | FC1=CC=C(C=C1)C2=N    | inactive    | -26.6211889  |
| NCGC00167965-01 | Lutein                   | CC2(C)C[C@H](O)CC(C   | inactive    | 0            |
| MLS002391605-01 |                          | COC1=CC(=CC(OC)=C1    | inactive    | 0            |
| NCGC00187905-01 |                          | C[S+](O-)(=O)C1=CC=C  | inactive    | 0            |
| NCGC00256909-01 | Benzyl 3-methylbutyl     | CC(C)CCOCc1ccccc1     | inactive    | 0            |
| NCGC00255814-01 | Styrene glycol           | OC(CO)c1ccccc1        | inactive    | 0            |

| Cell Viability IC50 (uM) | Cell Viability Efficacy (%) | SI         |
|--------------------------|-----------------------------|------------|
| inactive                 |                             | 0 60146    |
| inactive                 |                             | 0 7994.743 |
| inactive                 |                             | 0 7012.509 |
| inactive                 |                             | 0 5570.234 |
| 0.070112146              | -37.23885238                | 3.758374   |
| inactive                 |                             | 0 2394.455 |
| inactive                 |                             | 0 2304.32  |
| inactive                 |                             | 0 2053.715 |
| inactive                 |                             | 0 1976.406 |
| inactive                 |                             | 0 1976.393 |
| 2.067105254              | -78.60615294                | 26.10157   |
| 0.372214479              | -34.34227491                | 1.308177   |
| 0.742665522              | -38.32698871                | 2.326305   |
| 0.307227388              | -32.38286121                | 0.962351   |
| inactive                 |                             | 0 284.5815 |
| 0.417631514              | -42.21797846                | 0.891251   |
| 0.372214479              | -32.28980048                | 0.794328   |
| 4.685902657              | -68.08511616                | 9.261187   |
| inactive                 |                             | 0 190.1983 |
| 1.320666807              | -42.78229485                | 2.326305   |
| 1.372334335              | -59.88717951                | 2.326305   |
| inactive                 |                             | 0 156.9905 |
| 2.487672828              | -56.11065674                | 3.758374   |
| 1.17704553               | -47.3615285                 | 1.711328   |
| 0.417631514              | -39.34028649                | 0.520795   |
| 1.223094263              | -50.36255271                | 1.467799   |
| 2.410067784              | -38.26630065                | 2.610157   |
| 13.2065859               | -41.41688174                | 14.12538   |
| 0.61299923               | -57.02066048                | 0.630957   |
| 1.481812529              | -35.42702596                | 1.359356   |
| 1.372334335              | -72.9760468                 | 1.211528   |
| 0.636981172              | -37.34222548                | 0.520795   |
| 1.17704553               | -32.30104301                | 0.891251   |
| 0.882659627              | -35.50622942                | 0.668344   |
| 0.132066681              | -30.95392737                | 0.094406   |
| 2.147975174              | -52.41586345                | 1.525223   |
| 5.899201932              | -58.92494994                | 4.13682    |
| 1.481812529              | -38.85828232                | 1          |
| 1.662621003              | -39.66193143                | 1.079775   |
| 1.372334335              | -38.18887701                | 0.891251   |
| 1.223094263              | -33.37853771                | 0.794328   |
| 1.320666807              | -36.87170502                | 0.825404   |
| 1.17704553               | -34.56343                   | 0.681292   |
| 4.685902657              | -55.26668442                | 2.610157   |
| 1.481812529              | -36.18319745                | 0.794328   |

|          |             |              |          |
|----------|-------------|--------------|----------|
|          | 1.865491448 | -45.87538073 | 1        |
| inactive |             | 0            | 51.58698 |
|          | 2.014311331 | -39.54249827 | 1.039122 |
|          | 1.398921235 | -32.30036997 | 0.694491 |
| inactive |             | 0            | 49.64476 |
|          | 1.246789863 | -39.76516953 | 0.573236 |
|          | 1.426023215 | -39.56196088 | 0.655642 |
|          | 2.175003345 | -44.54396336 | 0.962351 |
|          | 2.093115831 | -37.98926055 | 0.926119 |
|          | 6.877964488 | -88.668866   | 2.818383 |
|          | 1.481812529 | -62.80488179 | 0.607202 |
|          | 1.727666567 | -37.95965103 | 0.681292 |
|          | 25.35867722 | -40.65016881 | 10       |
|          | 10.49042933 | -69.66103367 | 4.13682  |
|          | 2.63507671  | -38.13793248 | 1.039122 |
|          | 1.398921235 | -32.1990887  | 0.510897 |
|          | 3.131794539 | -56.6258126  | 1.100694 |
|          | 2.34851459  | -39.35940096 | 0.825404 |
| inactive |             | 0            | 35.1458  |
|          | 12.23094263 | -98.2277467  | 4.13682  |
|          | 1.17704553  | -53.05779427 | 0.398107 |
|          | 3.867763665 | -35.05905411 | 1.258925 |
|          | 2.63507671  | -40.32378356 | 0.794328 |
| inactive |             | 0            | 30.14441 |
|          | 3.94269573  | -42.45400805 | 1.059254 |
|          | 4.869225964 | -52.2991014  | 1.308177 |
|          | 1.426023215 | -36.44558181 | 0.368695 |
|          | 2.956604697 | -30.9192058  | 0.764422 |
| inactive |             | 0            | 24.88147 |
| inactive |             | 0            | 24.88132 |
|          | 3.192468317 | -51.74530164 | 0.794328 |
|          | 4.176315139 | -42.80762354 | 1        |
|          | 3.447147995 | -59.10516354 | 0.794328 |
|          | 2.63507671  | -34.83000394 | 0.584341 |
|          | 3.447147995 | -35.41143658 | 0.735642 |
| inactive |             | 0            | 20.53727 |
| inactive |             | 0            | 20.53715 |
|          | 7.14700184  | -66.33895416 | 1.412538 |
|          | 8.120023155 | -44.64695986 | 1.584893 |
|          | 14.26014344 | -52.87589002 | 2.610157 |
|          | 4.343447537 | -59.92234643 | 0.794328 |
| inactive |             | 0            | 18.07133 |
|          | 4.176315139 | -42.69705499 | 0.707946 |
|          | 13.98921235 | -52.21636221 | 2.282093 |
|          | 30.72273884 | -49.52108871 | 4.91662  |
|          | 4.339702209 | -41.70621262 | 0.694491 |
|          | 7.011214636 | -42.2668587  | 1.100694 |
|          | 4.685902657 | -39.30345109 | 0.735642 |

|          |             |              |          |
|----------|-------------|--------------|----------|
|          | 8.997598212 | -58.87961061 | 1.211528 |
|          | 7.426609018 | -53.87687782 | 0.891251 |
| inactive |             | 0            | 12.0007  |
|          | 11.7704553  | -35.75064299 | 1.412538 |
|          | 4.423777369 | -30.46323891 | 0.473151 |
|          | 10.49036407 | -59.16374006 | 1.079775 |
|          | 12.70944529 | -88.92495782 | 1.308177 |
|          | 11.7704553  | -37.56043394 | 1.211528 |
|          | 20.93115831 | -80.74756773 | 1.995262 |
| inactive |             | 0            | 9.532498 |
|          | 11.77038208 | -39.56839069 | 1.079775 |
| inactive |             | 0            | 8.999259 |
|          | 8.332792371 | -39.89835545 | 0.735642 |
|          | 6.369811724 | -64.81235188 | 0.562341 |
|          | 10.09540843 | -44.74951598 | 0.825404 |
|          | 24.40378709 | -59.3633296  | 1.995262 |
|          | 6.877964488 | -65.1665593  | 0.562341 |
|          | 14.26023215 | -60.14630884 | 1.143756 |
|          | 27.91197456 | -34.76330426 | 2.196174 |
|          | 4.01907949  | -36.02244275 | 0.316228 |
|          | 11.7704553  | -40.7674938  | 0.926119 |
|          | 20.142988   | -85.00351517 | 1.525223 |
|          | 16.6261066  | -51.96283957 | 1.258925 |
|          | 14.26023215 | -85.64542202 | 1.079775 |
|          | 15.69605676 | -33.80042776 | 1.143756 |
|          | 18.65491448 | -55.34581527 | 1.359356 |
|          | 23.4851459  | -47.79119987 | 1.711328 |
| inactive |             | 0            | 7.012552 |
|          | 14.81812529 | -60.88923475 | 1        |
| inactive |             | 0            | 6.494456 |
|          | 9.349604983 | -39.99945327 | 0.607202 |
| inactive |             | 0            | 6.371027 |
| inactive |             | 0            | 6.014637 |
|          | 8.826596273 | -49.77746299 | 0.530884 |
|          | 10.49042933 | -69.28206152 | 0.630957 |
|          | 4.339702209 | -36.87735749 | 0.261016 |
| inactive |             | 0            | 6.0146   |
| inactive |             | 0            | 6.0146   |
| inactive |             | 0            | 6.0146   |
|          | 26.3507671  | -43.74191582 | 1.525223 |
| inactive |             | 0            | 5.360551 |
|          | 10.9008391  | -59.47299251 | 0.584341 |
|          | 24.87672828 | -45.30276772 | 1.333521 |
|          | 18.65479842 | -65.72754967 | 0.944061 |
|          | 18.65491448 | -57.95328782 | 0.944061 |
| inactive |             | 0            | 5.060655 |
| inactive |             | 0            | 4.964507 |
| inactive |             | 0            | 4.777596 |



Secondary experimental confirmation results of model predicted anti-EBOV compounds.

| Sample ID       | Name                 | Structure           | EBOV IC50 (uM) |
|-----------------|----------------------|---------------------|----------------|
| NCGC00182117-01 |                      | CCC(=O)NC(C1=CC=C(C | 0.398107       |
| NCGC00125691-01 |                      | COC1=CC=C(C[N]2C3=  | 2.511886       |
| NCGC00133073-02 |                      | C1C1=CC=CC(=C1)NC(= | 2.511886       |
| NCGC00181913-02 | Difeterol            | OC(C(C)N(C)CCOC(c1c | 3.162278       |
| NCGC00131197-01 |                      | CC1=CC=CC=C1C(=O)N  | 3.162278       |
| NCGC00108517-02 |                      | CCOC(=O)C1=CC=C(C=  | 3.162278       |
| NCGC00246387-06 | Arbidol              | CCOC(=O)C1=C(CSC2=  | 5.011872       |
| NCGC00131135-01 |                      | CCOC1=CC=CC=C1CN[   | 0.251189       |
| NCGC00131075-01 |                      | COC1=CC=CC=C1CN[S-  | 1.258925       |
| NCGC00095996-03 | Acivicin             | N[C@H]([C@H]1C\C    | 3.981072       |
| NCGC00118167-01 |                      | CCOC(=O)N1CCN(CC1)  | 3.981072       |
| NCGC00115464-01 |                      | CCCC\1=C\C(=O)N\C(= | 5.011872       |
| NCGC00127044-01 |                      | COC1=CC=CC(=C1)CNC  | 5.011872       |
| NCGC00128675-01 |                      | CC1=NOC(=C1)C2=CC=  | 6.309573       |
| NCGC00135673-01 |                      | CCOC1=CC=C(C=C1)C(  | 6.309573       |
| NCGC00160678-01 | Fenoverine           | O=C(CN3CCN(Cc1ccc2  | 10             |
| NCGC00356798-01 |                      | CCOC1=CC=CC=C1N2C   | 12.589254      |
| NCGC00104607-01 |                      | C1C1=CC=CC(=C1)N2C  | 12.589254      |
| NCGC00115319-01 |                      | C[N]1C(=NC2=C1C=CC  | 12.589254      |
| NCGC00024762-07 | Tesmilifene hydrochl | CCN(CC)CCOC1=CC=C(  | 12.589254      |
| NCGC00185768-05 | Benidipine hydrochlo | COC(=O)C\1=C(C)\N\C | 15.848932      |
| NCGC00167817-03 | Bucindolol           | CC(C)(CC1=CNC2=C1C  | 15.848932      |
| NCGC00167493-14 | Manidipine           | COC(=O)C\1=C(C)\N\C | 15.848932      |
| NCGC00115545-01 |                      | COC1=CC=C(C=C1)C2=  | 15.848932      |
| NCGC00103037-01 |                      | COC1=C(OCC2=C(CI)C- | 15.848932      |
| NCGC00108569-01 |                      | CCOC(=O)C/1=C(CN(CC | 15.848932      |
| NCGC00485224-01 | ±-Zearalenol         | C[C@H]1CCC[C@H](O   | 25.118864      |

| <b>EBOV Efficacy (%)</b> | <b>Cell Viability IC50 (uM)</b> | <b>Cell Viability Efficacy (%)</b> | <b>SI</b> |
|--------------------------|---------------------------------|------------------------------------|-----------|
| -91.748                  | 12.589254                       | -132                               | 31.62279  |
| -115.801                 | 19.952623                       | -104.1                             | 7.943284  |
| -128.957                 | 25.118864                       | -32.5                              | 10        |
| -102.46                  | 25.118864                       | -106.1                             | 7.943281  |
| -93.194                  | 31.622777                       | -22.5                              | 9.999999  |
| -109.743                 | 25.118864                       | -26                                | 7.943281  |
| -144.135 >30             |                                 | 0                                  | 5.985787  |
| -100.35                  | 0.794328                        | -68.1                              | 3.162272  |
| -131.169                 | 3.162278                        | -76.9                              | 2.511888  |
| -102.902                 | 7.943282                        | -66.3                              | 1.995262  |
| -117.145                 | 15.848932                       | -77.3                              | 3.981071  |
| -104.35                  | 12.589254                       | -71.4                              | 2.511887  |
| -125.88                  | 19.952623                       | -114.86                            | 3.981072  |
| -133.332                 | 19.952623                       | -92.4                              | 3.162278  |
| -111.91                  | 25.118864                       | -79.7                              | 3.981072  |
| -118.836                 | 25.118864                       | -54.5                              | 2.511886  |
| -148.868                 | 19.952623                       | -61.5                              | 1.584893  |
| -106.362 >30             |                                 | 0                                  | 2.382985  |
| -91.846 >30              |                                 | 0                                  | 2.382985  |
| -134.226                 | 19.952623                       | -26.5                              | 1.584893  |
| -100.748                 | 19.952623                       | -132.7                             | 1.258925  |
| -116.128                 | 25.118864                       | -37.5                              | 1.584893  |
| -126.206                 | 19.952623                       | -114.86                            | 1.258925  |
| -94.3 >30                |                                 | 0                                  | 1.892872  |
| -122.398                 | 19.952623                       | -26.5                              | 1.258925  |
| -89.387 >30              |                                 | 0                                  | 1.892872  |
| -131.16 >30              |                                 | 0                                  | 1.194322  |
