# Supplementary material
Source: PubMed Central journal article supplement (PMC9843700)
Supplement: NIHMS1831774-supplement-SD4.pdf [file NIHMS1831774-supplement-SD4.pdf]

WFS scores of compounds predicted as active by at least one of the SARS-CoV-2 BABM models

| Compound ID     | Structure                  | Sample Name           | CM-M     | CM-S     |
|-----------------|----------------------------|-----------------------|----------|----------|
| AGJBLWCLQCKRJP  | Cl.CCN(CC)CCOC(=O)C(c1ccc  | Drofenine hydrochl    | 0.238834 | 0.263079 |
| VZTUIEROBZXUFA  | COC1=C(OC)C2=C(CC3N(CCC    | (d,l)-Tetrahydroberb  | 0.239483 | 0.272581 |
| DZAUSKKPHXFGNN  | COC1=CC(C2=NN=C3SCC(=N     | ML030                 | 0.256866 | 0.231271 |
| UKMHVECLTZDSBD  | [O-][N+](=O)C1=CC=C(CN2CC  | ML111                 | 0.312066 | 0.299525 |
| XECQQDXTQRYVBH  | CNCCC=C1C2=C(C=CC=C2)\C    | Norcyclobenzaprine    | 0.264062 | 0.294532 |
| IOMRUVGLZCUFRT  | COC1=CC=C(CN2CCC(CC2)N(C   | CCC3=CC=CC=C3)CC4     | 0.240461 | 0.245893 |
| DMJWENQHWZZWDF  | Oc3cc4[C@@H]1[C@H](CCc     | Ecopipam              | 0.258394 | 0.263402 |
| CBVFRUULJLOTQ   | CCOC1=NC=CC=C1C(=O)N2CC    | N(CCC2)C3=CC(Cl)=CC   | 0.243912 | 0.23287  |
| ILNSWVUXAPSPEH  | COC1=CC=C2C[C@H]3NCC[C     | 3-Methoxy-morphar     | 0.271975 | 0.251911 |
| LXKCKCXTVCHHDJ  | COC1=C(C=CC=C1)N2CCN(CC    | C=C4C=CC=NC4=C(O)     | 0.249166 | 0.224476 |
| HEYCRCGXZANZHI  | CCOC1=C(C=CC=C1)N2CCN(CC   | 2)[S+](O)C3=C         | 0.259488 | 0.245568 |
| JCTSLWVNRLJSRO  | COC1=C(C=CC=C1)N2CCN(CC    | 2)C3=NC4=C(C=CC=C     | 0.26128  | 0.239822 |
| GKQHRWNQTMNPNU  | [O-][S+](=O)(CC1=CC=C(F)C  | =C1)C2=NC(=C(N2CC#C)  | 0.275773 | 0.244099 |
| OECZVBJQWUDON   | CN1C(C)=NC2=C1C=CC(NCC3    | =CC=C(Cl)C=C3)=C2     | 0.252857 | 0.223762 |
| OYQJNUZLJJABAF  | CN(C)C1=CC=C(CNCCC(CC2=CC  | =CC=C2)C3=CC=CO       | 0.255629 | 0.244876 |
| NUUYLSYEZFKFHN  | CCCCCN1\C2=C(CCC2)/C(=N)   | JF5 hydrochloride     | 0.269157 | 0.240794 |
| GUILGOKXFRKEOS  | CC1=CC=C(C=C1)[S+](O)N2C   | (COC3=CC=CC=C         | 0.267198 | 0.236697 |
| ANGFJDSIPQARK   | COC1=C2C=C3C=CC=C(C(=O)N   | CCN(C)C)C3=NC2=C      | 0.258197 | 0.236291 |
| RLJFTICUTYVZDG  | CSC1=CC2=C(SC3=C(CC2N4C    | Methiothepin malea    | 0.273299 | 0.279054 |
| XSXWINNAABRHDK  | CCOC1=C(C=CC=C1)N2CCN(CC   | 2)C(=O)C3=C4C=CC      | 0.250735 | 0.231134 |
| MHPIVQZZFBEHAM  | CCOC(=O)C1=CC=C(NC2=CC(=N  | C(=N2)C3=CC=CC=C      | 0.310473 | 0.287954 |
| BYZBNLVKTLXVTR  | O=C(NC1=CC=CC=C1)C2=CC=C   | (CN3CCC4=C(C3)C=C     | 0.246844 | 0.228727 |
| UFLCBIIQTOCIHZ  | ClC1=CC=C(C[N]2C=NC3=C2C   | =CC=C3)C=C1           | 0.245046 | 0.22704  |
| OYPPVKRFBWMSX   | Cl.Cl.O.Br1ccc(cc1)C(=C\CN | Zimeldine dihydrocl   | 0.274294 | 0.231696 |
| ZZUZEMRHCMTVB   | NS(=O)(=O)C#CC1=CC=CC=C1   | Pifithrin-mu          | 0.238882 | 0.223362 |
| DTRXURJDKOYCCD  | ClC1=CC=C(C=C1)N2CCN(CC    | 2)FAUC 213            | 0.23899  | 0.248023 |
| GHCCBWMZKJQGLS  | ClC1=C(Cl)C=C(CC(=O)N2CCC  | BRL 52537 hydrochl    | 0.263804 | 0.263417 |
| WVZSEUPGUDIELE  | C[C@@H](CN1CCC(CC1)CC2     | Ro 25-6981 hydrocl    | 0.239753 | 0.240649 |
| ITJNARMNRKSWTA  | COc2ccccc2OC(CCNC)c1ccc    | Nisoxetine            | 0.283356 | 0.296124 |
| QJPPMXOOWNICQ   | C1COC2=C(O1)C=CC=C2N3C     | S15535                | 0.29727  | 0.277681 |
| ALFGDCNSEBJYSP  | CC(N)CC1=C[NH]C2=C1C=C(O   | BW 723C86             | 0.244655 | 0.229329 |
| MLDCBJPLHBPJET  | C(N1CCC2(CCCC3=CC=CC=C2    | L-687,384 hydrochl    | 0.299603 | 0.310166 |
| QONNLUMTBIZJFP  | FC1=CC=C(CN(C2=N\CCN2)C    | IMID-4F hydrochlori   | 0.260044 | 0.308534 |
| YMWVDVNGNLXSKR  | CNCCC1=C[NH]C(=N1)CCC(C    | 2)N-Methylhistaprodii | 0.290597 | 0.239345 |
| GGUSQTSTQSHJAH  | OC(CN1CCC(CC1)CC2=CC=C(F   | Eliprodil             | 0.242312 | 0.269948 |
| GYSZUJHYXCZAKI  | Cl.COC1=CC=CC(=C1OCCNCC    | 2-(2,6-DIMETHOXY      | 0.253573 | 0.258831 |
| BFNCJMURTMZBTE  | Cl.CN(C(=N)Nc2cccc1cccc1   | Aptiganel hydrochl    | 0.251866 | 0.252774 |
| QAUVAHYHKLJRJCQ | Cl.COC1=CC=CC(OC)=C1OCC    | Benoxathian hydroc    | 0.251056 | 0.303572 |
| KZFDKINRISJFCO  | CN1C2CCC1CC(C2)OC(C3=CC    | AMINOBENZTROPINI      | 0.265034 | 0.259224 |
| NNAIYOXJNVGUOM  | CCNC(=O)N1CCN(CCCC(C2=C    | Amperozide hydrocl    | 0.256516 | 0.246424 |
| NGIFHAUKQGDVSR  | CCOc1cc(cc(OCC)c1OCC)c3n   | Octaverine            | 0.272203 | 0.288211 |
| AFIHDGJQHWYCEI  | CCC1=C(C)SC2=C1CCN(CC3=CC  | =CC=C3)C2C4=CC=C      | 0.250273 | 0.22293  |
| ZERLIHBKGPVVDX  | COC1=CC=C(CN2CCC3=NC(=N    | C=C3C2)N4CCN(CC4      | 0.269439 | 0.23179  |
| BDKJNOPSOSKJIR  | CCN1CCN(CC1)C2=C(N=C(O2)C  | 3=CC=C(COC4=C(C)      | 0.245546 | 0.230974 |
| XZQQJDIBXKJVJF  | CC1=C(CN2CCCC(C2)C(=O)N    | 3CCN(CC3)C4=CC=C(F    | 0.246241 | 0.225444 |

|                 |                                                          |                 |          |
|-----------------|----------------------------------------------------------|-----------------|----------|
| CIRKDOSLJLFKPN  | CCOC(=O)C/1=C(CN(CC)CC2=CC=CC=C2)/NC(=O)NC               | 0.241342        | 0.224373 |
| STCBAYQPVGPEJH  | CCOC(=O)C1=CC=C(NC(=O)NC2=C(C=C3N(CC)C(=O)               | 0.24435         | 0.222754 |
| LOGLBGSTNVTMEV  | COC1=C(NC(=O)NCC2CCN(CC2)CC3=CC=CC=C3F)C:                | 0.270036        | 0.230708 |
| VPVBRPZCLWKVIY  | CC1=CC=C(C)C(=C1)CN2CCC(CC2)CNC(=O)NC3=C(F               | 0.283516        | 0.226523 |
| ZKSQEVKHZNUREQ  | CC1=CC=C(NC(=O)NCC2CCN(CC2)CC3=CC=CC(=C3)                | 0.261845        | 0.260004 |
| IPDSTPSTHDVIDQ  | CC1=CC=C(C=C1)[S+](=[O-])(=O)C2=C(OC(=N2)C3=C(f          | 0.250261        | 0.228122 |
| WVQXUNBZLOXIIU  | CCOC(=O)C1=C(C2=CC=CC=C2)C(=NN=C1NC3=CC=                 | 0.245124        | 0.232116 |
| ZMLWJWJTUFOMM   | CC1=CC=C(NS(=O)(=O)C2=CC=C(C=C2)C(=O)NC3CC1              | 0.259456        | 0.235133 |
| PAPMAGPVCPSSEQ  | [Br-].COC1=CC=C(C=C1)C2=CN3CCCCC3=[N+]2C4                | 0.309639        | 0.295221 |
| HHXJDHWPPPOVQFY | S=C(NCCCC1CCOCC1)N2CCN(CC2)C3=NC(=CS3)C4                 | 0.282327        | 0.276722 |
| GZFBOMZAQBAFPC  | COC1=C(OCC2=C(Cl)C=C(Cl)C=C2)C(Cl)=CC(CNCCO,             | 0.252537        | 0.242298 |
| BVNTYTGKKBBARC  | ClC1=C(NC(=O)NC2=CC=C(CN3CCCC3)C=C2)C=CC                 | 0.273893        | 0.273441 |
| GQOMALJFAKJXAC  | CC1=CC=C(CS(=O)(=O)C2=NC(=C(N2CC#C)C3=CC=C               | 0.272629        | 0.279836 |
| WPSYTTKBGAZSCX  | CCCCCCC[N+](CC)(CC)CCCC1 Clofilium tosylate              |                 | 0.241723 |
| SUIZRDJCBVPASY  | CN1CCN(CC1)CCC2=CC(=C(Cl                                 | BD 1063         | 0.264357 |
| PKCYPHSCUSQDK   | CC1=CC=C(C=C1)/C=C/2CNCC DUBInhibitor, NSC-6             |                 | 0.245124 |
| WHLUQAYNVOGZST  | CCN(CC)CCSC(=O)C(c1cccc1 Thiphenamil                     |                 | 0.251491 |
| UBAJTZKNDCEGKL  | O=C(CN3CCN(Cc1ccc2OCoc2 Fenoverine                       |                 | 0.245379 |
| LUYOZJXKSDIJJL  | CN1CCN(CC1)C2=NC=NC3=C2C=NN3C4=CC=C(Cl)C                 |                 | 0.244958 |
| JGDKHNHZZKSRBJ  | CC(=C)CN1C(=NC2=C1C=CC=C2)C3=CC=CC=C3                    |                 | 0.243936 |
| HQGDZPNAXRCSA   | C(CCC1=CC=CC=C1)CN2CCC(4 4-PHENYL-1-(4-PHEN              |                 | 0.251432 |
| QXJOXLIOUDNDFH  | O=C(N1CCN(CC1)C(C2=CC=C(                                 | MLS002586357-01 | 0.236355 |
| LNOBZXNCABUBKK  | C1=CC=C(C=C1)N2N=C(N=[N+ Chem Div, 0325-0423, NSC-261    |                 | 0.332881 |
| GWEHVDNNLFDJLR  | O=C(NC1=CC=CC=C1)NC2=CC DIPHENYLUREA                     |                 | 0.23895  |
| UUSFBNCIOFXBPP  | OC(CCN1CCCC1)C2=CC=C(C=C2)C3=CC=CC=C3                    |                 | 0.23264  |
| YMHOBZXQZVXHBM  | Cl.COCc1cc(CCN)c(cc1Br)OC 4-Bromo-2,5-dimethoxyamphet    |                 | 0.298582 |
| ZQTOZLYOIRKCP   | Clc1cc2N(c3cccc3Sc2cc1)C Azaclorzine                     |                 | 0.241673 |
| CVHGCWVMTZWGAY  | C(CCN1CCOCC1)c3ccc(COC2c Fomocaine                       |                 | 0.256329 |
| PCFAAKWHZFXLIF  | C[N]1N=NN=C1SCCCNCC2=C(OCC3=CC=C(F)C=C3)C=CC(=C2)Cl      |                 | 0.226744 |
| KBUOPNFNTRQMRH  | CC1=C(CN2CCC(CC2)C(=O)NCCCN3CCN(CC3)C4=C                 |                 | 0.242191 |
| KNJVRIMSFZQGE   | CCN1CCN(CC1)C(=O)C2=CC3=C(C=C2)[S+](=[O-])(=O)C4=C(C=CC= |                 | 0.225264 |
| UPLHUDRMLWWFRE  | O=C(NC1=CC=CN=C1)C2=CC=CS2                               |                 | 0.228773 |
| QUHHQVGVNSURGF  | CN1CCN(CC1)C(=O)C2=CC=CC(=C2)COC3=CC(=CC=C3Cl)Cl         |                 | 0.23717  |
| ODKPRIUYEYROGE  | CC1=CC=CC=C1N2CCN(CC2)C3=NC=NC4=C3C=N[N]4CC5=CC(=        |                 | 0.229812 |
| BFBGBTBYZIOWOF  | COC1=CC=C(C(=O)N2CCN(CC2)C3=CC=CC(Cl)=C3)C(OC)=C1        |                 | 0.251032 |
| HYGDONULCUPJME  | FC1=CC=CC(=C1)C(=O)N2CCN(CC2)C3=CC=CC(Cl)=C3             |                 | 0.227876 |
| FBZLYFODKQKGIQ  | FC1=CC=CC(=C1)C(=O)N2CCN(CC2)C3=CC=CC(=C3)C(F)(F)F       |                 | 0.223008 |
| NYPQKNLHCFKMRM  | ClC1=CC=C(OCCN2CCN(CC2)C3=NC=NC4=C3C=CS4)C=C1            |                 | 0.23024  |
| YQSPRFLNKVCSBN  | COC1=CC=C(C=C1)C2=NN=C(4 MLS000588015-01                 |                 | 0.227784 |
| INOKJENDVYITMZ  | FC1=CC(=CC=C1)C(=O)N\N=C\ MLS000576932-01                |                 | 0.229905 |
| ZOAQYHQNVPIKDS  | ClC1=C(Cl)C=C(CC(=O)NC2=C(C=CC=C2)N3CCCC3)C=C1           |                 | 0.226163 |
| LYLQJTSZYGWBO   | O=C(NC1=NC2=C(N1)C=CC=C2)C3=CC=CC=C3                     |                 | 0.234202 |
| NYYDXVOEUPUAPL  | ClC1=CC=C(CNC(=O)N2CCN(CC3=CC=CC=C3)CC2)C=C1             |                 | 0.231594 |
| RSPWWPVPVHMZZPT | [O-][S+](=O)(N1CCN(CCC2=CC=CC=C2)CC1)C3=C(F)C=CC=C3      |                 | 0.240089 |
| IDYSNGDPYWXNRL  | CN(C)C(=O)OC1=CC=C2C=CC=CC2=C1Cl                         |                 | 0.240211 |
| HODZVUNFLGXUQV  | O=C(NC1=CC=C(CSC2=CC=CC=C2)C=C1)C3=CC=C(CN4CCOCC4)       |                 | 0.242556 |
| UHGCEAWGKVKSQP  | CC1=CC=C(CN2CCN(CC3CC4CC3C=C4)CC2)C=C1                   |                 | 0.252453 |
| DXPSEJAAAVTTGJ  | ClC1=CC=C(OCC2=NC(=NO2)C3=CC=NC=C3)C=C1                  |                 | 0.243136 |

|                 |                                                            |          |
|-----------------|------------------------------------------------------------|----------|
| KUYBIRBICYKWAX  | CN1CCN(CC1)C2=C(N=C(O2)C3=C(F)C=CC=C3)[S+](O-)(=O)C4=      | 0.250255 |
| JFIRKCGRMORWHA  | CCOC1=CC2=C(C=C1)N=C(C)C=C2NC3=CC(=CC=C3)                  | 0.2402   |
| NEFIMYJEACGIMX  | CC1=C(SC=C1)C(=O)C2CCCN(C2)CC3=CC(=CC=C3[N]4C=CC=N4        | 0.244693 |
| QBXNQOWQGUPAEO  | [O-][N+](=O)C1=C/C=C\N=C\1S(=O)(=O)C2=C/C=C\C              | 0.250607 |
| XNRPWZMOVUAHLY  | CCN(CC)CCN1\N=C/2C3=CC=CC=C3C4=CC=CC(=C24)C1=O             | 0.228109 |
| NUWFSHWNAZZTED  | COC1=CC=C(OCCN2CCN(CC2)C(=O)C3=CC=C(OC)C=C3)C=C1           | 0.251943 |
| LOGTTZLPQLRADV  | C1CN(CCO1)C2=NC(=NC3=CC=CC=C23)C4=CC=NC=C4                 | 0.23402  |
| KTTMEOWBIWLMSE  | O1[As]2O[As]3O[As]1O[As](O2 Arsenic oxide (As2O3           | 0.30626  |
| IAYKDNJLSYQHS   | CCCCNCCOCCSC1=CC=C(Cl)C=C1                                 | 0.252335 |
| NOSIYYJFMPDDSA  | OC(=O)\C=C/C(O)=O.CN(C)CC( Acepromazine maleate            | 0.243708 |
| VNICFCQJUVFULD  | C1CN(CCN1)C2=C3C=CC=CC3 1-(1-Naphthyl) piperazine (hydr    | 0.291237 |
| GAAKALASJNGQKD  | NC1=CC=C(CCN2CCN(CC2)C3 LY-165,163                         | 0.244893 |
| VNZLQLYBRIOLFZ  | Cl.COC1=C(C=CC=C1)N2CCN( 1-(2-METHOXYPHENYL)PIERAZIN       | 0.229339 |
| FCBRFERWWOBAJC  | COC1=CC=C(CCCOC2=CC(CCN SKF 96365                          | 0.226692 |
| JXMYTVOBSFOHAF  | CN1CCC2=C(C=C(O)C(=C2Cl)C SKF 83959 hydrobromide           | 0.247237 |
| DEYFWGXTPWNADC  | Cl.CCCN(CCC1=CC=CC=C1)C2 ( )-PPHT hydrochloride            | 0.254643 |
| ZHVWWEYETMPAMX  | OC1=C2O[C@H]3C4=C(C[C@ NALTRIBEN                           | 0.246656 |
| WIYUZYBFCWCCQJ  | OC1=CC=C2CC3N(CC4CC4)CC NALTRINDOLE                        | 0.227155 |
| YJZYDPRMWWYWYCG | COC1=C(C=CC=C1)N2CCN(CC p-MPPF                             | 0.224174 |
| GFIPROCAVXFHHK  | CC1=CC=CC=C1/C=C/C2=N/C Metrazoline                        | 0.239855 |
| SNICMGDUOVKOPQ  | FC1=CC=C(C=C1)C(OCCCC2=C 3-(1H-Imidazol-4-yl)propyl di(p-  | 0.229325 |
| BDVFCVCGFMNCYPV | CC1CNCCN1[S+](O-)(=O)C2= 1-(5-Isoquinolinylsulfonyl)-2-m   | 0.223632 |
| HPMRFMKYPGXPEP  | C1C\N=C(/N1)C2COC3=C(O2) Idazoxan                          | 0.255238 |
| GOTMKOSCLKVOGG  | CN1CCC2=C(C=C(O)C(=C2Cl) R(+)-SCH-23390 HCl                | 0.222381 |
| HJWHHQIVUHOBQN  | OC1=C(O)C(Cl)=C2CCN(CC=C) ( )-Chloro-APB hydrobromide      | 0.223462 |
| DIHXJZHAIHGSAAW | NC(=N)NC(=N)NC1=CC=CC(=C 1-(3-Chlorophenyl)biguanide hy    | 0.248549 |
| DQVARXSGNFBPMB  | COC1=CC(=CC=C1)C(=O)NCC N-(2-[4-(4-Chlorophenyl)piperaz    | 0.234699 |
| RGSVXQJPSWZXOP  | C1CCN(CC1)C2(CCCCC2)C3=( 1-[1-(2-BENZO[b]THIENYL)CYCLO     | 0.255541 |
| SPHRJZBOFIKMC   | CN1CC\C=C(/C1)C(=O)OCC# ARECAIDINE PROPARGYL ESTER         | 0.262307 |
| MKIKWCVTTNYSRM  | C(N(CC1=CC=CC=C1)C2=CC=C Antozoline hydrochloride          | 0.24073  |
| HSIBGVUMFOSJPD  | Cl.COc4ccc5nc1c(CC[N@]3C Ibogaine hydrochloride            | 0.277103 |
| BOOQTIHIKDDPRW  | Cl.CCCN(CCC)CCc2cnc1cccc N,N-Dipropyltryptamine hydroc     | 0.343042 |
| SRARDYUHGVMQEI  | Cl.CCC(=O)N(c1cccc1)C2CC cis-N-[1-[2-(2-Thienyl)ethyl]-3-m | 0.276151 |
| HXJKWPGVENNMCC  | Cl.COc1cc(CC)c(cc1C[C@H] (-)-2,5-Dimethoxy-4-ethylamph     | 0.273506 |
| MLQRZXNZHAOCHQ  | Cl.CCC(=O)N([C@H]2CCN(CC( dl)-trans-3-Methylfentanyl hyd   | 0.267412 |
| QIRAYNIFEOXSPW  | Cl.O[C@@H](CC)C(C[C@H])(C (-)-alpha-Methadol hydrochloric  | 0.268433 |
| MOBGNTAHTMVGRR  | COC1=C(C=C(Cl)C=C1)N=C(S)N2CCN(CC2)C3=NC=CC=C3             | 0.232718 |
| YQGHHYKQSWMLODW | COC1=CC=C(C=C1)C(CC(=O)NC2=CC=C(F)C=C2)C3=                 | 0.255879 |
| HDDNYFLPWFSBLN  | CN3[C@H]1CC[C@@H]3CC( Tropanyl 3,5-dimet                   | 0.26114  |
| KLOHYVOVXOUKQI  | CN1CCC(CC1)N(Cc2cccc2)c3( Thenalidine                      | 0.31913  |
| DWGNPBBEALVNIR  | CCOC1=CC=C(C=C1)C2=NC(=NO2)C3=CC=CN=C3                     | 0.244372 |
| UKMDHFPPBAQTFG  | FC1=CC(NC2=NC(NC3CCCC3)=NC(Cl)=N2)=CC(F)=C                 | 0.251922 |
| IJJBBDVJOWKDH   | COC1=CC=C(NC2=NC(NC3=CC=C(OC)C=C3)=NC(NCCN4CCOCC4          | 0.260326 |
| BDILTGVTEOHPIK  | C[C@H]1C=CC(=O)O[C@H]1C2=CC=CC=C2                          | 0.224933 |
| DFWLUVUOEZMWQPV | CCOC(=O)C1=C(N2CCN(CC2)C3=C(F)C=CC=C3)C4=C(C=CC(OCC)       | 0.227071 |
| ZZKWNLZUYAGVOT  | CCN(CC)CCC(=O)N1c3cccc3! Chloracizine                      | 0.271526 |
| VHEOUJNDDFHPGJ  | CCN(CC)CCC(=O)N1c3cccc3! Fluacizine                        | 0.223734 |
| PXCGUZNRBAQKAB  | CN1N=CC2=C1N=CN=C2N3CCN(CC3)C4=C(F)C=CC=C4                 | 0.238083 |

|                 |                                                       |          |
|-----------------|-------------------------------------------------------|----------|
| APGOOCWNIINFPJ  | CN1CCN(CC1)C2=NC=NC3=C2C=N[N]3C4=CC(=CC=C4)Cl         | 0.246938 |
| DQQMGLDIAJRKW   | COC(=O)C1=CC=C(OCC2N(CCC3=C2C=C(OC)C(=C3)OC)C(=O)C4=  | 0.22375  |
| VETBVAKKYZIKRK  | CC1=CC=C(C=C1Cl)N2C(=O)N(CC3=C\C(=O)N\4\C=C/C=C\C4=   | 0.235047 |
| GPJVSQZGAOXHIW  | CC\1=C\C/2=N/C(=C(NC(=O)C3=CC=CC(=C3C)[N+](O))\C(=C   | 0.327342 |
| CEPGWKKGZRBHG   | COC1=CC(=CC(=C1)OC)NC2=NC=C3CN(CCC3=N2)C              | 0.245695 |
| JLHGCVVZJNGSQH  | FC1=CC(=C(C=C1)C(N2CCN(CC2)C3=CC=CC=C3)C4=NN=C(O4)C   | 0.23493  |
| DICMBJJRKNWXTG  | COC1=CC=CC=C1N2CCN(CC2)C(C3=NN=C(O3)C4=CC=CC=C4Cl     | 0.23492  |
| TXFUVYDUOHOUDL  | CCC1CCCCN1CCCNC(=O)C2=CC=C3[N](CC)C(=C(C)C            | 0.245756 |
| SXCRMWLOJMWHPG  | CC1=CC=C(CNCC2=CC=C[N]2C3=NN=C(S3)N4CCCC4)C=C1        | 0.229774 |
| MEGZOGVQYGEFBX  | CCC1=C(C)SC=C1CN2CCN(CC: Chem Div, E534-0253          | 0.228431 |
| PAQFEHWKTBIHQI  | CC1=C(C)C(CN2CCN(CC2)C3= Chem Div, E534-0094          | 0.233827 |
| HHUHTYPDNPXLCS  | ClC1=CC=C(SC2=C([NH]C3=CC=CC=C23)C(=O)NCCC4CCCC4)     | 0.225248 |
| VVZWQHYQWYYBDE  | CCC1=NOC(=N1)C2=CC=C(N(C)CC3=CC=C(OC)C=C3)C(=C2)[N+]( | 0.24165  |
| XUVOEKZZGXXJJI  | CCOC(=O)N1CCN(CC2=NC3=C Chem Div, D305-295            | 0.240706 |
| JHCWGQKLJOGGAR  | C[N]1N=NN=C1SCCCNCC2=C(OCC3=C(F)C=CC=C3)C=CC(=C2)Cl   | 0.239888 |
| OSHCHHSOIGAPML  | C[N]1N=NN=C1SCCCNCC2=C(OCC3=CC=CC=C3)C=CC(=C2)Cl      | 0.252126 |
| TVGHFPDPQWJAGF  | C[N]1N=NN=C1SCCCNCC2=CC(=CC=C2OCC3=CC=CC=C3F)Br       | 0.236409 |
| UCEMOVOKNXCDUO  | CC1CCN(CC1)C2=C(N=C(O2)C3=CC=C(COC4=CC=CC=C4)O3)C#    | 0.2268   |
| NWEDWOABKQWTDU  | C[N]1N=NN=C1SCCCNCC2=CC=CC(=C2)OCC3=CC=CC=C3          | 0.227293 |
| QPGOBLUKOSGNHM  | C[N]1N=NN=C1SCCCNCC2=C(OCC3=C(F)C=CC=C3)C=CC=C2       | 0.228976 |
| FNZNPRYSUBBQJ   | CC1=CC=C(CN2CCC(CNC(=O)NC3=C(C)C(=CC=C3)Cl)C2)C=C1    | 0.244336 |
| QYCDHOMGRPUYGX  | CC1=CC=C(CN2CCC(CNC(=O)NC3=C(C)C(=CC=C3)C)C2)C=C1     | 0.246675 |
| VQQBZTNRGPPYFN  | CCOC1=CC=C(C=C1)C2=NOC(=N2)CSC3=NN=C(CC4              | 0.250146 |
| UVEIXJDMRJJAMC  | COC1=CC(=C(C=C1)C2=NOC(=N2)CSC3=NN=C([N]3C4=CC=C(F)C  | 0.227963 |
| DBTSMXDVKNLBP   | CCOC1=CC=C(C=C1)[N]2C(=NN=C2SCC3=NC(=NO3)C4=C(OC)C=   | 0.231026 |
| BUVXGEZANDRKKB  | COC1=CC=C(C=C1)C2=NOC(=N2)CSC3=NN=C(CC4=CC=CC=C4)[    | 0.265961 |
| RYLMHLDCUKZUSS  | COC1=CC=C(C=C1)C2=NOC(=N2)CSC3=NN=C(CC4=CC=CC=C4)[    | 0.230362 |
| QVNQLKRLMYARFB  | CCCC[N]1C2=CC=CC=C2N=C1C3=CC(=CC=C3)C                 | 0.240034 |
| SEPNIPIXTZMOGZ  | CC1=N[N](C2=CC=CC=C2)C(=C1C(=O)NCCC3CCN(CC3)C4=C(F)   | 0.233654 |
| BWCSBZZQPYAWEW  | CCN(CC)CCNC(=O)NC1=CC=C(SC3=C(C=CC=C3)C(=O)N2CC4=C    | 0.232125 |
| NQZCPBKSHZHIDA  | CCN1CCN(CC1)C2=C(C=NC3=CC=C(F)C=C23)[S+](O)(=O)C4=C   | 0.231722 |
| DTATUEFDBHWISO  | CCN1CCN(CC1)C2=C(C=NC3=CC(=C(OC)C=C23)OC)[S+](O)(=O   | 0.235165 |
| JQWLNIKOJZUWLS  | COC1=CC=C(C=C1)[S+](O)(=O)C2=C(N3CCCC3C)              | 0.242826 |
| NNKVUACOWDPTOS  | COC1=C(OC)C(=CC(=C1)C2=NOC(=N2)CN3CCN(CC3)C4=CC(=CC   | 0.23651  |
| ZKASZIKRZDGTGO  | CCN1C(=O)C2=C(SC(=C2)C(=O)NCCC3CCC(C)CC3)             | 0.250769 |
| DNBSWMXOBBPNKG  | CC1=CC=CC(=C1)C2=NC(=C(C)O2)CN3CCCC(C3)C(=            | 0.24314  |
| IZGZVVFFWOPDG   | CCC1=CC=C(C=C1)C2=NC(=C(C)O2)CN3CCCC(C3)C(            | 0.24113  |
| CRQMYNFFVQYLNBN | CCN(CC)CCCNC(=O)C1=CC=C(SC3=C(C=CC=C3)C(=             | 0.255032 |
| UEGSWOARNYEWYSY | CC1=CC=C(CCNC(C2=NN=C(O2)C3=C(Cl)C=CC=C3)C4=CC=C(F)C  | 0.234111 |
| OKPDBTJLFYBXNP  | COC1=CC=C(CCNC(C2=NN=C(O2)C3=C(Cl)C=CC=C3)C4=CC=C(F)  | 0.253269 |
| GXQRIOYHWKCKEE  | CC\1=N\N=C2N1C3=C\C=C/C=C/3/N=C\2NCCC4=               | 0.252873 |
| DDPHSKFUSLMYGE  | COC1=C(C=CC=C1)N2CCN(CC2)C(C3=CC=C(Cl)C=C3)C4=NN=C(   | 0.2695   |
| WJYADGBJCBQJIT  | CC1=CC=CC(=C1)N2CCN(CC2)C(C3=NN=C(O3)C4=              | 0.254785 |
| CQNXXVWIPTIHWMO | FC1=CC=C(C=C1)N2CCN(CCCNC(=O)NC3=C(Cl)C=CC=C3)CC2     | 0.25768  |
| SZWCDFDONZOYIQM | CCOC1=CC=C(NC(=O)NCCC2CCN(CC2)C3=CC=C(OC)C=C3)C=C     | 0.235476 |
| HGBDQMVPLSVOPA  | FC1=CC=C(NC(=O)NCC2CCN(CC2)CC3=CC=CC=C3F)C=C1Cl       | 0.230767 |
| RUGYNWMSERWJIV  | FC1=CC=C(NC(=O)NCC2CCN(CC2)CC3=CC=CC(=C3)             | 0.257308 |
| UQBQZQCCEDCSSI  | CCN1CCN(CC1)C2=NC3=CC=C(NC(=O)C4=CC(=CC=C             | 0.246823 |



|                |                                                           |          |          |
|----------------|-----------------------------------------------------------|----------|----------|
| PQFNWDHABGBCHB | C(NC(C1=CC=CC=C1))(C2=CC=UCL 2077                         | 0.270768 | 0.265043 |
| MDESCHUXWOWHQJ | CN(C)CC\C=C/1C2=C(SC3=C1 Chlorprothixene hyc              | 0.24483  | 0.271933 |
| MNHDKMDLOJSCGN | COC1=C(C=CC=C1)N2CCN(CC BP 897                            | 0.254893 | 0.246755 |
| IBQMHBGFMHLHLE | CCN(CC)CCCCCCCCOC(=O)C1: TMB-8                            | 0.266883 | 0.292467 |
| INYHMKFEIYIEMI | CN1CCN(CC1)C2=CC(=CC=N2)C3=CC4=CC=CN=C4C                  | 0.2656   | 0.226409 |
| MKXUVDRBPODBNG | CN(C)CCCN1C2=C(CCC3=C1C=CC(=C3)[N+](O-)=O                 | 0.244357 | 0.234317 |
| CBHCDHNUZWWAPP | CN1CCCC(CN2C3=CC=CC=C3! Asinex Ltd.,BAS 011               | 0.347333 | 0.320256 |
| HTHNSEMKEHCSTM | CN(C)CCN(CC1=CC=CO1)C(=O)C2=C(NC(=O)C3=CC=                | 0.240309 | 0.227063 |
| BZKSQQXINBVDCB | COC1=CC=CC(=C1)CNCC2=CC=C[N]2C3=NN=C(S3)N                 | 0.253486 | 0.230133 |
| XYCGAHJDVGYNKA | C[N]1N=NN=C1SCCCNCC2=CC=CC(=C2)OCC3=C(Cl                  | 0.287601 | 0.252479 |
| SYOKJUFJPXSYSF | BrC1=CC(=CC=C1)NC(=O)NCCN2CCN(CC2)C3=CC=C                 | 0.249429 | 0.230087 |
| UZLVWFBDXMRGC  | CCN(CC)C1=CC=C(C=C1)C(=O)NC2=CC=C3N=C(C=C                 | 0.246475 | 0.224084 |
| RCNQBNUIYIJXKA | CC1=CC(=CC=C1)NC2=NC(=NC(=N2)N3CCOCC3)NC                  | 0.247441 | 0.225433 |
| HCZJUQSPQYTBZ  | CC1=CC=CC(\C=N\NC2=CC(=NC(=N2)N3CCOCC3)N                  | 0.238906 | 0.229137 |
| MWAUQHNLXGQFJC | Cl.C1C1=CC=C(CN2C3=CC=CC=C3N4CCCN=C24)C=                  | 0.273576 | 0.261708 |
| CZGWXYLLXFDSEJ | C1CN(CCO1)C2=CC(N\N=C\C3=CC=CC=C3)=NC(=N                  | 0.239328 | 0.243454 |
| HAFZKOVMNKGNKS | CN(C)C1=NC(=NN=C1C2=CC=CC=C2)C3=CC=CC=N3                  | 0.267566 | 0.266358 |
| FJUKDAZEABGEIH | FC1=CC=C(OCCCN2CCC3(CC2 AMI-193                           |          | 0.230611 |
| SDYYIRPAZHJOLM | CN1CCN(CC1)C2=CC3=C(OC4 Azaphen                           |          | 0.222694 |
| UNAHYJYOSSSJHH | CCCN(CCC)C1=C(C=C(C=C1[N Oryzalin                         | 0.256952 |          |
| BDTGZELZUBXECI | C1CCN(C1)C2=NC(N3CCCC3 Enamine,T5241771                   |          | 0.247205 |
| FBMYKMYQHCBIGU | N#Cc3ccccc3OCC(O)CNC(C)(C Bucindolol                      |          | 0.241779 |
| HKGJEZIGDHFJFL | CC(NC1=NC(=NC2=CC=CC=C1 Importazole                       |          | 0.258093 |
| MHNSOBBJZCWUGS | CN1C2CCC1CC(C2)OC(C3=CC 3alpha-Bis-(4-fluoro              | 0.244653 |          |
| ASGIQUHBAVIOTI | CN(CCN1CCCC1)CCC2=CC=C BD 1008                            | 0.238577 |          |
| MZRNPVMMFFYDMP | OC(COC(C1=CC=C(Cl)C=C1)C2 MLS000536652-01                 |          | 0.29137  |
| GZIZSEZACLKNGZ | Cl.OC(COCCCCCCCC)CN Decominol hydrochloride               |          | 0.225721 |
| SASASNHHBSXROE | COC1=CC(=C(NC2=NC3=CC=CC=C3C(=C2)C(=O)NCC                 | 0.241858 |          |
| SKEYWVHTUBBHY  | CCCCN1C(=N)N(CCO2=C(OC)C=CC=C2)C3=C1C=CC=C3               |          | 0.230907 |
| LBMRVOOUBNQXAX | COC1=CC=C(CNCCC(C2=CC=C3OCOC3=C2)C4=C(O                   | 0.24729  |          |
| YLKDCSKJNOKCGZ | OC(COC1=CC=CC=C1)CN2C(= BEPP monohydrochloride            |          | 0.235306 |
| UPBDZILZTPVMPX | CN(CCN1CCCCC1)CCC2=CC( N-[-(3,4-DICHLOROP                 | 0.25028  |          |
| REQHIGZKPANFBN | CC(C)NCC(O)CN1CCN2C3=C(C=C(C)C=C3)C4=C2C1                 | 0.255814 |          |
| HOFDPCCJQDBINI | CC1=CC=C(OC2=CC=C(NC(=O)CN3C=CSC3=N)C=C2                  | 0.247549 |          |
| YCOOGVUXVXEMJG | FC1=CC=C(C=C1)C2=CSC3=C2C(=NC=N3)N4CCC5=C(C4)C=CC(=       | 0.227454 |          |
| CGRZMNFYFYXES  | CC1=C(C)C2=C(S1)N=CN=C2NC3CCN(CC4=CC=CC=C4)CC3            |          | 0.222785 |
| IFFPICMESYHZPQ | CC(CC1=CC=CC=C1)NCCC(C2: Prenylamine                      |          | 0.246508 |
| GNCXAVSTKVWZCH | CCN1CCN(CC1)C(=S)NC2=CC(Cl)=C(Cl)C=C2                     |          | 0.24609  |
| HFBNIJOVWGRREA | CCOC1=CC=C(NC2=NC(=NC(=N2)N3CCOCC3)N4CCOCC4)C=C1          | 0.265152 |          |
| IVHLLANKSUTQN  | CC(NC1=C2C=CC=CC2=NC(=N1)N3CCCC3)C4=CC=CC=C4              |          | 0.232656 |
| ISMDJEWLVHMDGS | ClC1=CC(=CC=C1)NC2=NC(=NC3=CC=CC=C23)C4=CC=NC=C4          |          | 0.2719   |
| RAQPOZGWANIDQT | C=1C=CC(=CC1)CCCN2CCN(C GBR 12935                         |          | 0.233512 |
| RKXSQHTWNMDLJM | CCN1CC[C@@H](CNC(=O)C2: S-(-)-Eticlopride hydrochloride   |          | 0.226083 |
| LXFHSCDLMBZYKY | CN1CCN(CC1)C=2C3=CC=CN CGS 12066B                         |          | 0.225078 |
| AMEKQAFGQBKLKX | CC=1OCCS(=O)(=O)C=1C(=O)N Oxycarboxin                     |          | 0.226435 |
| ZQHYKVKNPWDQSL | Br.Oc3ccc4C[C@@H]2[C@H](-)-Phenazocine hydrobromide       |          | 0.248728 |
| BVURVTVDNWSNFN | CC(=O)OC2(CCN(CCCc1ccccc1 1-(2-Phenylethyl)-4-phenyl-4-ac | 0.31054  |          |
| VWCUGCYZZGRKEE | Cl.C[C@@H](NC)CC(c1ccccc L-alpha-Acetyl-N-normethadol h   |          | 0.254403 |

|                  |                                                       |          |          |
|------------------|-------------------------------------------------------|----------|----------|
| MEZAVJNOAZTJPC   | COC1=CC=C(C=C1)C2C3=C(OC4=CC=C5C=CC=CC5=              | 0.255373 |          |
| XBDPCQXFTHAEHE   | CC1=NOC(\C=C\C2=CC(C)=CC=C2)=C1S(=O)(=O)N3(           | 0.259232 |          |
| OPYDXMHWHHPGNV   | CN(C)CCN(CC1=CC=CO1)C(=O)C2=C(NC(=O)C3=CC=CC=C3)C4=C  | 0.226729 |          |
| ADBFCSPXCVYNDU   | CCN1CCC(CC1)N(CC2=CC=C(F)C=C2)C(=O)NC3=CC=CC(=C3)C(F  | 0.226412 |          |
| FKNPUTFWVWCFQZ   | CN1CCN(CC1)C2(CCCCC2)CNC(=O)COC3=CC(=C(Cl)C(=C3)C)C   | 0.240241 |          |
| NKXGFAHVHMZMBQ   | CN1CCN(CC1)C2(CCCCC2)CNC(=O)C3=CC=C(C=C3)C(C)C        | 0.236529 |          |
| NXRHQNINGABYRC   | C[N]1N=NN=C1SCCNCC2=CC=CC=C2OCC3=CC=C(Cl)C=C3         | 0.226216 |          |
| KPOMOQCZFUZOEG   | CC1=CC=C(CN2CCC(CNC(=O)NC3=CC=C(Cl)C=C3)C2)C=C1       | 0.23962  |          |
| YBEQARLMYVDZPS   | CC1=CC=C(CN2CCC(CNC(=O)NC3=CC(=C(C)C=C3)C)C2)C=C1     | 0.269957 |          |
| CEBQGAWALVBGDD   | ClC1=CC=C(CN2CCC(CC2)CNC3=NC=NC4=C3C(=NO4)C5=CC=C     | 0.22421  |          |
| YZNZQGRVSPBRCS   | CCN(CC)CCOC(=O)C1=CC=C(NC2=C3CCCC3=NC4=CC=CC=C24)     | 0.251375 |          |
| SOPGMAUDVXIZMJ   | CN1C(=O)\C=C(SCC(=O)N2CCN(CC2)C3=CC(=CC=C3)           | 0.238641 |          |
| VPLGPTNWXVJMBQ   | CCCN(CCC)CCNC(=O)C1=CC2=C(S1)[N](C)N=C2C3=            | 0.25491  |          |
| WDEVVLOWARINKQ   | CCC1=C(NC2=NC3=CC=CC=C3C(=C2)C(=O)NCCCN(              | 0.246748 |          |
| GLWYWFYFMOQZWFQ  | CN(C)CCNC(=O)C1=CC2=C(SC3=C(C=CC=C3)C(=O)N            | 0.24037  |          |
| HXUNRLYGWQEZF    | CCCC/1=N/C2=C(SC3=C1C=CC=C3)C=CC(=C2)C(=O)NCCCN(CC)   | 0.23122  |          |
| JPZVQEUBNKRFL    | FC1=CC=C(C=C1)N2CCN(CCCNC(=O)NC3=CC=C(Cl)C=C3)CC2     | 0.284918 |          |
| WEBXDMFWYIQYOX   | CCN(CC)C1=NC2=CC=C(NC(=C Chem Div, C126-0067, NSC-261 | 0.231445 |          |
| OSEXCKTQMLTCE    | FC1=CC=C(C=C1)C2N(CC(=O)NC3=C2C=C(Br)C=C3)C(=O)COC4=  | 0.224934 |          |
| VHJPMBFXS FVNMMW | CCOC1=C(CN(CCC2=CC3=C(OCO3)C=C2)CC4=CC=C              | 0.245177 |          |
| IPNLKYHAOUKDJV   | CCN(CC)CCN\1/C(S\C=C1C2=CC=CC=C2)=N/C3=CC=CC=C3       | 0.245149 |          |
| SYEJOEKBJARQNW   | CC[N]1C2=C(C=CC=C2)C3=C1C=CC(=C3)CN4CCN(C             | 0.247528 |          |
| WSLTYZVXORBBLB   | IC1=CC=CC=C1CNC2C3CCN(C L-703,606 oxalate             | 0.239825 | 0.231216 |
| HILYPTQJNFXLCJ   | CCCN1N=CC(CN2CCC(CC2)C(=O)NC3=CC(=CC=C3)C             | 0.271927 | 0.251526 |
| GUDVQJXODNRIJ    | C[C@H]1CN(CCC[N]2C3=C( Rimcazole                      |          | 0.237513 |
| QPQKUYVJSJWQSDY  | NC1=CC=C(C=C1)\N=N\C2=CC 4-amino azobenzene           |          | 0.222481 |
| BGNXMDRDUPEAQZ   | OC(CN1C(=N)N(CCN2CCCC2 InterBioScreen, STO            | 0.247433 | 0.23945  |
| GBWZKWXAMNEFFC   | CCCCSC1=C(OC)C=C(C(CNC)C(C)C)C(O)=C1                  | 0.250342 | 0.244845 |
| YITAORWEHMMACD   | ClC1=CC=C2SC3=CC=CC=C3CC(N4CCNCC4)C2=C1               | 0.298102 | 0.277371 |
| NGZXDRGWBULKFA   | COC1=C(O)C2=C3[C@H](CC4=CC(OC5=C(OC)C=C               | 0.281002 | 0.253835 |
| QEJWNTNYCWDNQTO  | ClC1=CC(NC(=O)OCCN2CCN(CC3=CC=CC=C3)CCC2              | 0.238991 | 0.241263 |
| AUPFODUFUNPAOB   | CCN1CC\C=C(C1)C2=C[NH]C3=CC=CC=C23                    | 0.255156 | 0.251044 |
| WKLILWHYTVQKO    | CCCCCN\1/C2=C(/CCC2)C(=N)\C3=C1CCC3                   | 0.27052  | 0.288349 |
| OZJZAHYJFKHRHA   | ClC1=CC=C(CN/2\C3=C(CCCC3)/C(=N)C/4=C2CCC4            | 0.257234 | 0.252581 |
| OJGAAQMNLKYWSQ   | CCN(CC)CCN1=C2C=CC(Cl)=CC2=NC=C1                      | 0.252913 | 0.271597 |
| VAKMKOXCESUTKU   | CN(C)CCNC(=O)C12CC3(C)CC(C)(CC(C)(C3)C1)C2            | 0.243472 | 0.254653 |
| MKXZASYAUGDDCJ   | COC1=CC2=C(C[C@H]3[C@H Dextromethorphan               | 0.263274 | 0.283705 |
| SFALRUMUWIIQMK   | CC(N1CCN(CC1)C(=O)CC)C2=CC=CC=C2                      | 0.264278 | 0.224769 |
| DVBSBxBABNLMIS   | CC1=CC(CN2CCN(CC2)C(=O)CC)=CC=C1                      | 0.255553 | 0.229207 |
| IGSLPFRVZBFLCQ   | CC(NC(=O)CC)C1=CC(Cl)=C(Cl)C=C1                       | 0.245219 | 0.232732 |
| XKNMHYBWPOWHGN   | COC1=C(C\C(N)=N\OC(=O)C2=CC(=C(C)C=C2)[N+](           | 0.273096 | 0.244716 |
| JCTRJRHLGOKMCF   | COC1=CC(=NC=C1)C2=CC=CC Caerulomycin A                | 0.273651 | 0.234422 |
| AEQDJSLRWYMAQI   | COC1=C(OC)C=C2[C@H]3C Asinex Ltd.,BAS 004             | 0.252843 | 0.275725 |
| DTIOIVMYVABWOA   | COC1=CC=CC(=C1)NC(=O)C2=CC(=C(NCCCN3CCC(C             | 0.246241 | 0.226254 |
| TVEGJOPFJFHLHL   | CCCCCCCCN1C=CC(=N)C=C1                                | 0.280722 | 0.260172 |
| ZVECUHIVPCIEDV   | ClC1=CC=CC(=C1)CN\2\C3=C(CCCC3)\C(=N)C\4=C2           | 0.311502 | 0.287249 |
| UDTBCHLPTINKIU   | COC1=CC=CC(=C1O)CN2CCN(CC2)C(C3=CC=CC=C3              | 0.299565 | 0.281626 |
| IMBPMAAMRHSTEU   | ClC1=CC2=NC=CC(=C2C=C1)NCC3=CC=CC=C3                  | 0.2785   | 0.240224 |

|                 |                                                |          |          |
|-----------------|------------------------------------------------|----------|----------|
| TYMAQOZPKMPEEI  | [Cl]C1=NC=NC2=C1C(=CS2)C3=CC=C([Br])C=C3       | 0.253167 | 0.230683 |
| HYNDEBBGYDBODO  | CC1=CN=C(CCNCC2=C[N](N=C2C3=CC=C(F)C=C3)C      | 0.271427 | 0.256006 |
| RCEPLTQHRCQLIM  | CC(C)[N]1C=C(CN2CCCC(C2)C(=O)NC3=CC=CC(=C3     | 0.262347 | 0.22939  |
| OFCFGAWKLIJWMU  | CCCN1CCC(CC1)NCC2=C[N](C)N=C2C3=CC=C(OC4=      | 0.269558 | 0.250783 |
| DIAIPLSVPPGLTG  | CC(=NNC(=S)NC1=CC=CC=C1Cl)C2=CC=CC=N2          | 0.277022 | 0.240567 |
| FCIINDKJSDJDMO  | COC1=CC2=C(NN=CC3=CC=C(F)C=C3)C=C(C)N=C2C      | 0.252376 | 0.234881 |
| WTCHDUNWZHYYS   | ClC1=CC2=C(C=C1)C(N\N=C\C3=CN=CC=C3)=CC=N      | 0.24054  | 0.241441 |
| DQGSSSLXBXDNFM  | CC1(C)N=C(N)N=C(N)N1C2=C Chem Div, 0075-005    | 0.325842 | 0.310293 |
| LSDJYKNINCJROA  | CN(C)CC\C=C1\C2=C(SC3=C1C=C(Cl)C=C3O)C=CC=     | 0.272377 | 0.270472 |
| TYKXLUMYKFFSJE  | C(N1CCC(=CC1)C2=CNC3=CC Chem Div, C800-01C     | 0.253472 | 0.236226 |
| TVZWPUCJIAREL   | COC1=CC=C(C=C1)C2C3=C(OC4=C2C(=N)N(CCCN(C      | 0.261124 | 0.230841 |
| KEUFFISILHOPIT  | CCCC\C1=C(/CCC)C(=N)C2=C(C=CC=C2)N1C           | 0.260138 | 0.236403 |
| BKARIVRTTVHMED  | COC1=CC=C(C=C1)C(O)(CCC(C Chem Div, D163-00:   | 0.266826 | 0.226706 |
| CYDRXTMLKJDRQH  | CCCCCCCCCCCC[N+](C)(C)CC1 Alkyl* dimethyl ben: | 0.265266 | 0.22571  |
| SYKLCRHFGLITIY  | CN1CCN(CCCC(=O)C2=CC=C(C=C2)C3CCCC3)CC1        | 0.265559 | 0.228372 |
| KQKIJSXRQLKDCH  | O=C1CC2=CC=CC=C2SC3=C(OCCN4CCCCC4)C=CC=        | 0.23934  | 0.232283 |
| JXPQMHI XNPWEEK | NCCC1=CC(OCC2=CC=CC=C2)=C(OCC3=CC=CC=C3)       | 0.310731 | 0.26888  |
| OFQDDTLVBDRDIE  | COC1=CC=C(C=C1)\N=C2N(C(=S)N(C\2=N\C3=CC=C     | 0.254419 | 0.242925 |
| UUPAPYGETUCQQY  | CCCCCCCSC1=CC(=C(CCN(C)C)C=C1OC)OC             | 0.269895 | 0.26834  |
| SPHRAOZAEYDNOD  | CCCCCSC1=CC(=C(CCN)C=C1OC)OC                   | 0.262074 | 0.231757 |
| VYUFRDMGURKYMP  | CCCCCSC1=CC(=C(CCN)C=C1OC)OC                   | 0.292748 | 0.253168 |
| NXIDBHKWPOTQRS  | CCN\1CCSC1=C\C=C\C2=[N+](CC)\CCS2              | 0.238761 | 0.229115 |
| LSMFRNHKRLJLH   | CC1=CC2=C(C(=N1)C)C3=CC=CC=C3[NH]2             | 0.25232  | 0.244555 |
| QHYGSNAGFBDJNF  | CCCCCCCSC1=C(OC)C=C(CCN)C(=C1)OC               | 0.257646 | 0.232537 |
| UAFVYCBWJBEHFW  | CN(C)CCC1SC2=C(OC3=C1C=CC=C3)C=CC=C2           | 0.283065 | 0.290852 |
| BJWIODCFNLUSQT  | CN(C)CC\C=C1\C2=CC=CC=C2SC3=CC=C(F)C=C13       | 0.351761 | 0.348372 |
| BMELRMVLLCJZEK  | COCCCN1CCN(CC1)C2CC3=C(SC4=C2C=C(Cl)C=C4)      | 0.284025 | 0.288841 |
| KKWBALVHTAINIA  | CN1CCN(CC1)\C2=C\C3=CC=CC=C3SC4=CC(=CC=C:      | 0.300795 | 0.288834 |
| KXECCBGQPJGJGD  | COC1=CC(=CC2=C1SC3=CC=CC=C3/C2=C/CCN(C)C       | 0.284967 | 0.266838 |
| XAFCDVVTUZRLTJ  | COC1=CC2=C(C=C1Cl)C(=C/CCN(C)C)\C3=CC=CC=C     | 0.273576 | 0.255232 |
| IJPYWKZIRIFQGO  | CN1CCN(CC1)\C2=C\C3=CC=CC=C3SC4=CC(=C(Cl)C     | 0.250493 | 0.268361 |
| CBOFLGIANBSBCN  | CN1CCN(CC1)C2=CC3=C(SC4=C2C=C(F)C(F)=C4)C=     | 0.28091  | 0.30667  |
| LXXWKTMDVBORIZ  | CN1CCN(CC1)\C2=C\C3=CC(=CC=C3SC4=CC(=CC=C      | 0.267763 | 0.275218 |
| OKHWNJARAFKRRE  | CNCCCC1SC2=CC=CC=C2OC3=CC=CC=C13               | 0.292288 | 0.270041 |
| DECPXWOQZCMYMS  | CN(C)CC1=CC(SC2=CC=C(Cl)C=C2)=CC=C1            | 0.277699 | 0.267545 |
| FTELXJYVTOFJAI  | CNCC\C=C1\C2=CC=CC=C2CSC3=CC=CC=C13            | 0.323103 | 0.291664 |
| UYUKSGQLYHPHCQ  | CN1CCN(CC1)C(C2=CC=CC(=C2)Cl)C3=CC=CC=C3Cl     | 0.320103 | 0.337795 |
| FGNRFYZVFTXMK   | CCCCCSC1=C(OC)C=C(CCN(C)C)C(=C1)OC             | 0.290751 | 0.261087 |
| SLSXXOCGDJFZGQ  | CC1=C(NC(S)=NC2=C(C)C=CC=N2)N=CC=C1            | 0.242746 | 0.237437 |
| SAIFDQQEXJWFQD  | CC1=CC=CC(=N1)NC(=S)NC2=CC=CC(=N2)C            | 0.25839  | 0.259044 |
| IENXZUWRUBNESG  | ClC1=CC=C(C=C1)C(=O)NNC/2=N/C3=CC=CC=C3SC      | 0.24069  | 0.241574 |
| RPSOLZRELOLSFM  | COC1=CC=C2N(CC3=CC=CC=C3)C(C)=C(CC[NH3+])C     | 0.297249 | 0.258218 |
| MPBJZRJBGUVTBE  | COC1=CC=C(C=C1)N2CCN(CC2)C3=NC=CC=N3           | 0.253559 | 0.235383 |
| WLTSTDGGFCQWTK  | NC(=N)NN=CC1=CC=CC(Cl)=C Enamine,T0510-361     | 0.287371 | 0.287286 |
| QPSNWMWKJWYOMD  | CN(C)C1=CC=C(C=C1)\N=N\C2=CC=CC(=C2)F          | 0.240945 | 0.224368 |
| MAMUGDCJLAKCPT  | C(NC1CCCCC1)C2=CNC3=C2C=CC=C3                  | 0.288402 | 0.237948 |
| ONHBRYWYNVUGHT  | NC(=N)NN=CC1=CC=C(Br)C=C Chem Div,0589-000     | 0.285636 | 0.244488 |
| UJVPVNYJQYVQSO  | CNCCCCOC1=C(C=CC=C1)C2=CC=CC=C2                | 0.307366 | 0.279899 |

|                 |                                                            |          |          |
|-----------------|------------------------------------------------------------|----------|----------|
| RDLIBCPWPNCFBW  | NC(=N)NC(=N)NC1=CC=C2C=CC=CC2=C1                           | 0.258906 | 0.234777 |
| JYULRDHEGXZIJL  | C1CCN(CC1)CCOCCOC2=CC=CC=C2C3=CC=CC=C3                     | 0.312687 | 0.290109 |
| MQOBLGHESXFRAZ  | S=C(NCCC1=CC=CC=C1)NC2=CC=CC=C2                            | 0.253062 | 0.233176 |
| NUUUPPWZYJRJGI  | CCN(CC)CC#CCOC(C1=CC=CC=C1)C2=CC=CC=C2                     | 0.278414 | 0.245823 |
| GMSJLIWEQRALHY  | CN(C)CC1=C(C)[N](CC2=CC=CC=C2)C3=C1C4=C(C=C(               | 0.260331 | 0.222787 |
| KGFKMQPKZITFIV  | CN1CCC(CC1)C2OC3=CC(=CC=C3SC4=CC=CC=C24)                   | 0.3017   | 0.323234 |
| DJBLGERXKWAXLD  | CN1CCC(CC1)C2OC3=C(SC4=C2C=C(CI)C=C4)C=CC:                 | 0.28818  | 0.294346 |
| AMJLPOOQDHBZPR  | COC1=CC=C2SC3=CC=CC=C3OC(C4CCN(C)CC4)C2=                   | 0.32378  | 0.320216 |
| YYKVLQRQUTRJDZ  | COC1=CC(=CC(=C1OC)OC)C2=NOC(=C2C3=CC=C(N:                  | 0.284721 | 0.267136 |
| XQSLNGSRJSYIBL  | CN(C)C1=CC=C(C=C1)C2=[N+](C)C3=C(C=CC=C3)N2                | 0.285322 | 0.276195 |
| CBCFXXYRVWKHQC  | CC1=CC2=C(C=C1)N=C(C)C3=C2N(CC3)C4=CC=CC=                  | 0.270824 | 0.245063 |
| OQOOPJFBMWZREC  | CCNC(=S)N1N=C2C(CCC3=C2C=CC=C3)C1C4=CC=C                   | 0.252733 | 0.235942 |
| WILZNSGPHFGHJX  | CCOC(=O)C1=C(CN(C)C)N(C2=C1C=C(OC)C(Br)=C2)(               | 0.287419 | 0.259964 |
| GGOXYHMFSLXAN   | CCOC1=CC=C(C=C1)[N+] <sub>2</sub> =C3CCCN3C=C2C4=CC=C      | 0.254825 | 0.248466 |
| SUHSDBYPTUCXHW  | CCOC1=CC=C(C=C1)[N+] <sub>2</sub> =C3CCCCN3C=C2C4=CC       | 0.285423 | 0.272482 |
| GBOMJGJESBMUBL  | CS(O)(=O)=O.O[C@H](C1CCCCN1)C2=C3C=C(CI)C=C                | 0.266194 | 0.297212 |
| RYQOGSFEJBUZBX  | CN(C)CCCN3c1ccccc1C(C)(C) Dimetacrine                      | 0.261877 | 0.282269 |
| FFWJGCZSJMMGEI  | CC1(C)N=C(N)N=C(N)N1CCCC2=CC=CC=C2                         | 0.246413 | 0.283205 |
| VGMOECBHITYGPM  | CN(C)CCCN1C2=C(SC3=C1C4=C(C=CC=C4)C=C3)C=                  | 0.238614 | 0.281319 |
| LKIZLUUZCMZBLW  | COC1=CC(=CC=C1)N2CCN(CC2C)C3=C4[NH]C5=C(C                  | 0.287757 | 0.254118 |
| BJMFBYNATMSQTP  | CC1=CC=CC(CNCCC2=CNC3=C( Vitas-M Laboratory,!              | 0.26961  | 0.247251 |
| CZKHLIOQQPRGJK  | CCCCCCCC[N+](C)(C)CC#CC Vitas-M Laboratory,!               | 0.251676 | 0.255793 |
| HQQKWRPQQKVXRB  | CC1=CC=CC=[N+] <sub>1</sub> CCCCCCCC Vitas-M Laboratory,!  | 0.254228 | 0.222447 |
| LIJXCAFRPKFKCP  | C(C#CCN1CCCC1)C(C2=CC=C( Vitas-M Laboratory,!              | 0.33135  | 0.335301 |
| WDPPSRUIMSQVFX  | NC(=N)N\N=C\1=CC=C(CI)C= Vitas-M Laboratory,!              | 0.319876 | 0.297283 |
| STPQBRUWBPEJCN  | OCCN(CCO)CC(O)COC1=CC=C Enamine,T5909565                   | 0.262176 | 0.228533 |
| SYJINUQHFMETCP  | COC1=CC=C(OC)C(CN2CCC(C( Vitas-M Laboratory,!              | 0.279076 | 0.260116 |
| FPDWKSDUHWBCL   | CC1=CC=CC=C1C(O)(CC2=CC= Vitas-M Laboratory,!              | 0.3075   | 0.289571 |
| CESGBQSBLXNVKX  | OC(CNCC1=CC=C(C=C1)C2=C( Vitas-M Laboratory,!              | 0.263324 | 0.229641 |
| USIDXIDZIUJEKU  | CCC[N+] <sub>3</sub> (CC#CCC(C1=CC=CC Vitas-M Laboratory,! | 0.26382  | 0.244699 |
| NIWNHZODVYNBFS  | CC(C)C1=CC=C(NC(=N)NC2=N Chem Div,4477-289                 | 0.249639 | 0.223979 |
| FNEZJMQBSHKMIA  | CC1=CC=CC(NC2=C3CCCC3=† Chem Div,C660-083                  | 0.262994 | 0.228349 |
| NVICAXRWBNEKMT  | COC(=O)C1=CC=C2N=C(C)C=C Chem Div,4593-273                 | 0.24047  | 0.226926 |
| FGIVPSPMBRNHEY  | COC(=O)C1=CC=C(NC2=CC(C): Chem Div,4491-097                | 0.268121 | 0.239245 |
| UVVUMMGAJMWWVFM | CC1CCN(CC(=O)NC2=CC=CC(= Enamine,T5290474                  | 0.270404 | 0.246545 |
| KOMRTHWJNSSNLB  | CN1CCN(CCNC(=O)C2=CC=C3 Chem Div,K216-768                  | 0.274347 | 0.238955 |
| REFRNPWWMHBHCL  | O=C(NCCN1CCCC1)C2=CC=C‡ Chem Div,K216-789                  | 0.254577 | 0.226584 |
| YVKYTTQUAYMNOQ  | C1CCCN(CC1)C2=NC(=NC3=C Vitas-M Laboratory,!               | 0.288818 | 0.241153 |
| QOAKTPEJLHCBO   | CC1CCN(CC1)C2=NC3=NON=† Vitas-M Laboratory,!               | 0.260071 | 0.243049 |
| WYXTXIDBBBUKIV  | CC1=CC(=NC(NCC2=CC=CC=C Vitas-M Laboratory,!               | 0.25461  | 0.241066 |
| BZOHAWADDWQPIT  | CN(C)CCCN(C(=O)COC1=CC=C Chem Div,E677-062                 | 0.265708 | 0.262206 |
| JAQENPDJAEDSC   | CCOC1=CC=C(C=C1)N(C)[S+](† Chem Div,G008-480               | 0.278697 | 0.23539  |
| FWCBUVFNUHGVBB  | CC1=CC=CC=C1OC2=NC(=NC: Vitas-M Laboratory,!               | 0.250687 | 0.232835 |
| ZXDFNGUSZJCZPH  | CC1CCN(CC1)C2=CC(C)=NC(N Vitas-M Laboratory,!              | 0.244233 | 0.240309 |
| PAKPPURFMNDWCG  | CC1=CC=CC(OCC(=O)NC2=CC: Asinex Ltd.,BAS 072               | 0.257303 | 0.227814 |
| FAYBXLDJSJPFDR  | CC(C)C(=O)N1CCN(CC1)C2=C( ChemBridge,772314                | 0.257458 | 0.243442 |
| QXIZHCZGPHGTBW  | [O-][S+](=O)(N1CCN(CC1)C2=† Enamine,T5234320               | 0.283187 | 0.242025 |
| DNZVGXSDOODGHQ  | COC1=CC=C(C=C1[S+](†[O-])(=C Chem Div,G008-348             | 0.246499 | 0.236241 |

|                 |                                                 |          |          |
|-----------------|-------------------------------------------------|----------|----------|
| KIXWJXQGZKHFMX  | CCOC(=O)C1=C(C)C(C(=O)OCC Enamine,T0501-114     | 0.29226  | 0.283935 |
| MKAUGKLCXEBZIA  | C1CN(CCO1)C2=NC(=NC(NC3 ChemBridge,52244:       | 0.255017 | 0.248909 |
| OVYALIXIJXEDH   | COC1=CC=CC=C1NC(=O)NCCCN2CCN(CC2)C3=CC=         | 0.246915 | 0.258963 |
| WMC0BGJXXFYVRA  | CCCCCOC1=CC=C(CN2CCN(C)CC2)C=C1                 | 0.262366 | 0.270962 |
| VHYFECUKHCCEAK  | COC1=CC=C(C=C1)N2CCN(CCCN)CC2                   | 0.24705  | 0.277661 |
| PBZVAJFSCGGMOF  | COC1=CC=C(CI)C=C1N2CCN(CCNC(=O)NC3=CC=CC        | 0.252792 | 0.253094 |
| RJYPWYYZMZYMIR  | CN(CCCNC(=O)CS(=O)CC1=C(C)OC(=N1)C2=CC=C(CI     | 0.252585 | 0.258507 |
| BEZDSETXCGGGJR  | CC(C)(C)NC1=N\C(=N/C(C)(C)C)C2=C1C=CC=C2        | 0.263024 | 0.259752 |
| QLECRJJRHFSNEX  | COC1=CC=C(C=C1)[N]2N=NN=C2C3=CC=CC(=C3)O(       | 0.238504 | 0.310774 |
| LFTMKYWQWYEXEN  | COC1=CC=CC(=C1)NC2=CC(=NC3=CC=CC=C23)C          | 0.255843 | 0.29324  |
| AUTUDPBMJAOGQU  | CN1CC[C@H]2[C@@H](C1)C3=C(C=CC(C)=C3)N2C        | 0.262359 | 0.237461 |
| QDEGMPXTGWEAPT  | COC1=CC=C(NC2=CC(=NC(=N2)[N]3N=C(C)C=C3C)C      | 0.253169 | 0.250902 |
| VZJMOBOCJKRZFP  | CC(C(=O)C1=CC=C(C=C1)C2=C Chem Div, 0986-002    | 0.261824 | 0.249727 |
| NWEBNKIPPLMNS   | CN(C)C1=CC=[N+](CC2=C(CI)C Specs, AI-204/3171(  | 0.298651 | 0.277554 |
| PZLSVBQHOMDHF   | CCOC1=CC=C(C=C1)C2=C(C)[N InterBioScreen,STOC   | 0.23886  | 0.226514 |
| XSOOUJWKXLJQDS  | CCN1CCN(CC1)C2=NC3=C(C= Chem Div,C267-010       | 0.284675 | 0.268429 |
| TXIMTUQQVCEGL   | C(C1CCCN(CC2=CN(N=C2C3= ChemBridge,89594:       | 0.241621 | 0.226868 |
| NRCPSSPRJLREJB  | C(CNC1[C@@H]2[C@H]3C[ Vitas-M Laboratory,'      | 0.313088 | 0.304927 |
| WLSZYJYDVSBLTI  | CC1=CC=C(C=C1)C2=[N+](C3= Florida Center for Hc | 0.26957  | 0.236143 |
| NNJRYSTVBBMUKZ  | CN1CCC(CC1)N(C)[S](=O)(=O)C2=CC=C(NC(=O)C3=C    | 0.263533 | 0.234697 |
| NDBWIVOTAIDHPM  | CC(C)(OCCOC(C1=CC=CC=C1)C2=CC=CC=C2)C#CCN       | 0.272185 | 0.254793 |
| LNVXTFBKJKJARDM | CCOC(=O)C1=C(C)[N](CCC(=O)NCCN(C)C)C(=C1)C2=    | 0.292061 | 0.243317 |
| ILJTXKNIYLUOKP  | COC1=CC2=C(CN(CC3=C(OC)C(C)=C(OC)C=C3)CC2)      | 0.274061 | 0.270244 |
| VEJZPHVTWOPCRO  | C1CCN(CC1)C2=NC(=NC(=N2)N3CCNCC3)NC4=CC=        | 0.345024 | 0.315681 |
| UXRRIDYXTYCVLB  | CC[N]1C(=CC2=C1C=CS2)C(=O)NCCCN3CCC4=CC=C       | 0.260476 | 0.227834 |
| WNZBBTJFOIOEMP  | OC(CCCN1CCC(O)(CC1)C2=CC=C(CI)C=C2)C3=CC=C      | 0.2773   | 0.267416 |
| OYPLCWQTVBUWTM  | COC1=CC=C(NC(=O)NCCCN2CCN(CC2)C3=C(C)C=C(C      | 0.242868 | 0.253599 |
| YYNYGLXURQQEQG  | CC(C)(C)C1=NC(=CC(=C1O)CN2CCCC2)CN3CCCC         | 0.248203 | 0.253852 |
| WFOUJWQZTHAZJG  | OC(COC1=CC=CC=C1CI)CN2CCN(CC2)CC(O)COC3=        | 0.270486 | 0.280067 |
| BCKIDIWAYYOCIW  | CC(C)C1=CC=C(OCCN2CCCC2)C=C1C                   | 0.248108 | 0.266694 |
| CQVLIEXZVXLFLG  | CN1CCN(CC2=CC=C(O2)C3=CC=C(CI)C=C3)CC1          | 0.279124 | 0.279137 |
| AUBXBUBULXKDT   | COC1=CC(OC)=C(CC(C)N2CCN(CC3=CC=CC=C3)CC2       | 0.301871 | 0.323638 |
| FCBIYBXBWZVPBD  | CCCN1CCC(CC1)N2CCN(CC2)C3=CC=CC(=C3)C(F)(F      | 0.244997 | 0.241441 |
| HYKNYFJFLPXZRE  | CN1CCCN(CC1)C2=CC(=C3C=CC(=CC3=N2)CI)C          | 0.255553 | 0.280873 |
| ISKKHUSIKPRBKI  | CC1=NC2=C(C=CC=C2)C(=C1)N3CCN(CC3)S(=O)(=O      | 0.244968 | 0.243099 |
| BYFGRYLYFBKQEZ  | CCN(CC)S(=O)(=O)C1=CC(=CC=C1)S(=O)(=O)C2=CC(=   | 0.24133  | 0.303796 |
| CPCLOFLASZPHDE  | CC1=CC(=CC(=C1CI)C)OCCCCNCCO                    | 0.250397 | 0.246443 |
| ZPERRVVQFXNOJR  | FC1=CC=CC=C1N2CCN(CC2)C3CCN(CC3)CC4=C[NH        | 0.255999 | 0.250653 |
| XQZHFUGHTZTKPS  | COC1=CC=CC=C1N2CCN(CC2)C\C(C)=C\C3=CC=CC:       | 0.254175 | 0.233398 |
| NKJPGWVVBAMXKV  | COC1=CC=C(CC(C)N2CCN(CC2)C3=CC=CC=C3OC)C:       | 0.256038 | 0.237853 |
| NYXWNDQIERERNF  | ClC1=CC(CN2C=CC(=N)C=C2)=CC=C1                  | 0.247573 | 0.292915 |
| SSALKHAQQLSWJX  | CC(C)COC1=CC=C(C=C1)C(=O)OC2CC(C)(C)OCC2CN      | 0.245272 | 0.239728 |
| GINHCWKIPFCPGO  | CCN(CC)CCNCC1=CC=C(O1)C2=CC=C(CI)C=C2           | 0.290588 | 0.282436 |
| OYOPDPNOZYCMMQ  | ClC1=CC=C(CN\2/C3=C(/CCC3)C(=N)\C4=C2CCC4)      | 0.252367 | 0.249941 |
| WBUOONNMVHIUJT  | COC1=C(OCC(O)CN2C(=N)N(CCN3CCCC3)C4=C2C         | 0.246184 | 0.236789 |
| OFFPNKGMYSJLJY  | CCCCCN1C=CC(=N)C=C1                             | 0.247561 | 0.272177 |
| VQTGKBAJYPPULX  | CCCCN\1/C2=C(/CCC2)C(=N)\C3=C1CCC3              | 0.241008 | 0.263097 |
| JALPLGVFZRCLGE  | COC1=CC2=NC(=NC(=C2C=C1OC)N)N(C)C               | 0.240426 | 0.224816 |

|                 |                                              |          |          |
|-----------------|----------------------------------------------|----------|----------|
| QFVMLXCCDCNYCS  | C1C1=CC=C(CN\2\C3=C(CCCC3)/C(=N)C/4=C2CCC4   | 0.280997 | 0.247862 |
| UHWJVPVZFBUSSSG | CC(C)(C)NCC(O)COC1=C(C=CC=C1)C(C)(C)C        | 0.271044 | 0.244266 |
| PZWBEOLGVSPLN   | COC1=C(C=CC=C1)N2CCN(CC(O)COC3=C(CC=C)C=C    | 0.250155 | 0.237037 |
| FLUSUHIOAMEDSO  | COC1=CC(C(N2CCC3=C(C2)C=CC=C3)C4=NN=NN4(     | 0.238729 | 0.259421 |
| GVHBAMOZUBPHBK  | CCC(C)(C)[N]1N=NN=C1C(N2CCN(C)CC2)C3=CC=C(   | 0.24658  | 0.280337 |
| JRXYNZLQRFULFO  | Cl.CC(C)CCN1N=NN=C1C(N2CCN(C)CC2)C3=CC=C(    | 0.260557 | 0.27278  |
| YBVAHNMGJMBORJ  | COC1=CC=C(C[N]2N=NN=C2C(N3CCN(CC3)C4CCCC     | 0.285907 | 0.280871 |
| PBSQZIRUKNBOCE  | COC1=CC=C(C=C1)C2=CSC(=N2)N(CCCN(C)C)C(=O)   | 0.247212 | 0.226466 |
| KQLGOMMTFREDOH  | FC1=CC=C(C=C1)C(N2CCN(CC2)C3CCCC3)C4=NN=     | 0.239895 | 0.242097 |
| UZAKPJWEDZHORJ  | CC(COC1=CC=CC2=CC=CC=C12)CN3CCN(C)CC3        | 0.303634 | 0.32356  |
| HNGOLBWFANUTTN  | CC1=C(CN2CCC(CC2)C(=O)NCC3=CC=CO3)N=C(O1)    | 0.244    | 0.232425 |
| XIDPKWNHTMGYLI  | CCN1CCCC1CNC(=O)C2CCN(CC2)CC3=C(C)OC(=N3     | 0.252213 | 0.258677 |
| DJAFUYUUNCOPL   | CCCN(CCC)CCNC(=O)C1CCN(CC2=C(C)OC(=N2)C3=    | 0.239844 | 0.250011 |
| ZKSJDJCDPAHDEZ  | CC1=CC(C)=NC(NC2=NCN(CC3=CC=CC=C3)CN2CC4     | 0.246962 | 0.260729 |
| FDZVUOCOEGXCBN  | COC(=O)C1=C(NC(=O)CCN2CCN(CC2)C3CCCC3)C4     | 0.247652 | 0.243597 |
| RYMXUUSZSNQCDEU | CN1CCN(CC1)CC#CC[N]2C3=CC=CC=C3C4=CC=CC=     | 0.316952 | 0.302759 |
| NUXNRDBZVAEAIN  | COC1=CC=C(C=C1)N2CCN(CC2)CC3=NC(=NC(=N3)N    | 0.240402 | 0.255918 |
| SXXXSTPMDGKCOCH | COC1=CC(CNC2=NC3=C(C=CC=C3)N2CCN4CCCC4       | 0.24205  | 0.246247 |
| MXUQNKSYQMNLKF  | CC1CC(C)CN(CC2=NC(N)=NC(NC3=CC=C4C=CC=CC     | 0.244239 | 0.260287 |
| BYPSWJMJCJBEHG  | CN1CCN(CC1)C2=C(NC(=O)C3=CC=C(C=C3)C4=CC=    | 0.24128  | 0.244371 |
| SUWUZUZIVDBESQ  | CN1CCC(CC1)N(C)C2=NC(=NC3=CC=CC=C23)C4=C(    | 0.255853 | 0.270877 |
| DTQFEZKWSNPMLU  | OC1=C(CN2CCCN(CC3=C(O)C=CC=C3)C2)C=CC=C1     | 0.259455 | 0.269899 |
| CPDQMHWCVLERNY  | CC(OC1=C(Cl)C=C(Cl)C=C1)C(=O)NC2=CC=C(C=C2)N | 0.247005 | 0.261109 |
| BCEAOWDUQRYWIV  | CN1CCC(CC1)OC(=O)C2=CC(=C(C)C(=C2)C)Br       | 0.252275 | 0.252163 |
| IXIFGHGIRITVND  | OC(=O)C(O)=O.COC1=CC=C(Br)C=C1CN2CCCC(C2)C   | 0.266826 | 0.229588 |
| OZPGNDYAYQWBWDW | CC1=CC(=CC=C1)C2=NC(=C(C)O2)CN3CCCC(C3)C(=   | 0.25267  | 0.264437 |
| RDLHLPXIDOQCOT  | CCN(CC)CCCN(C=O)C1=NOC(=C1)C2=CC(Cl)=C(Cl)C  | 0.250524 | 0.247238 |
| ZGXCULSRUGPOMX  | OC(CN(CC=C)CC=C)C[N]1C2=CC=CC=C2C3=CC=CC=    | 0.243005 | 0.235857 |
| IQADDSWPWJZCIDP | COC1=CC=C(C=C1)C2=CC(=NC(=N2)N3CCN(C)CC3)    | 0.259895 | 0.260842 |
| JQTJFTYSSQMFNE  | COC1=CC(NC(=O)NCCCN2CCN(CC2)C3=CC=C(F)C=C    | 0.288716 | 0.2855   |
| FDDDVYRBXUWWGA  | N#CC1=CN(N=C1C2=CC=CC=C2)C3=CC=CC=C3         | 0.242927 | 0.260122 |
| XJARCBWQBOGRIF  | OC(COCC1=CC=CO1)CN2CCN(CC2)C(C3=CC=CC=C3     | 0.244388 | 0.256156 |
| QQIMTPNEIOSTBG  | CN1CCN(CC1)C(C2=CC=CC(=C2)C(F)(F)F)C3=NN=N[  | 0.241746 | 0.247099 |
| JQKXCAKYDCGFPQ  | COC1=CC=C(C=C1)C(N2CCN(CC2)C3=CC=C(OC)C=C    | 0.247332 | 0.267695 |
| GTYGHNLEDSNBW   | COC1=CC(C(N2CCN(CC2)C3=CC=CC=C3)C4=NN=NN     | 0.240679 | 0.261655 |
| KKJLKEDWERCNBT  | CC1=C(C=C(Cl)C=C1)N2CCN(CC3=NN=NN3C4CCCC     | 0.250939 | 0.285635 |
| NQAWQTUJTNDVDCW | NC1=NC2=C(CCCC2)C3(CCCCC3)S1                 | 0.281105 | 0.28076  |
| NXUFLCBISRVMAG  | COC1=CC=C(C[N]2N=NN=C2C(N3CCN(CC3)C4CCCC     | 0.239847 | 0.270564 |
| GWPBJZLYMUVMV   | CC1=CC=C(C=C1)C(N(CC2=CC=CO2)CC3=CC=CS3)C    | 0.249884 | 0.281768 |
| QUFMFZUZPVSFQX  | CCN(CC)CCCN(C(=O)C1=CC=CS1)C2=NC(=CS2)C3=C   | 0.239684 | 0.244021 |
| XAFFCERJMHIDRK  | COC1=CC(NC2=C3C=CC=CC3=NC(C)=C2)=C(OC)C=C    | 0.259026 | 0.262179 |
| JAASKQSZJDOJLJ  | CC(C)(C1=CC=C(C=C1)OCC(CN(C)C)O)C2=CC=C(C=C  | 0.254877 | 0.271054 |
| NRRHFICIUBUJLNZ | CCOC1=CC(CN2CCCC2C3=CN=CC=C3)=CC=C1          | 0.248269 | 0.263586 |
| LBTYJJUTDNCITA  | COC1=CC=CC=C1N2CCN(CCCCOCC3=CC=C(F)C=C3)C    | 0.247223 | 0.258953 |
| MODPIKSCMXTCPZ  | CCOC(=O)C1=C(CNCCN(CC)CC)N(C)C2=C1C=C(OC)C   | 0.245612 | 0.231951 |
| POTWBOICYBGNOO  | CN1CCN(CC1)CCC(=O)N2C3=CC=CC=C3SC4=CC=C(     | 0.24187  | 0.245958 |
| HVGXTVMBLACNG   | O=C1N(C2CCCC2)C(=O)C(=CNCCN3CCNCC3)C(=O      | 0.26531  | 0.238642 |
| UQUXFXRMNTUFQA  | C1C1=CC=C2N=C(N=C(C3=CC=CC=C3)C2=C1)N4CCI    | 0.243013 | 0.24409  |

|                 |                                                |          |          |
|-----------------|------------------------------------------------|----------|----------|
| GLVKFPUFWVMVQL  | CCOC(=O)C1=C(CN2CCN(C)CC2)N(C)C3=CC(Br)=C(C    | 0.279788 | 0.266454 |
| HNDWHMKTONQBSA  | COC1=CC=C(NC(=S)N(CCC(C)C)C2CCN(CC2)C(C)C      | 0.250689 | 0.248527 |
| VJUCHMDKYBGFJT  | CCN(CC)CCNC(=O)C1=CC=C(NC(=O)C2=CC=CC=C2C      | 0.29126  | 0.271058 |
| OBXAQYFZXPBRKV  | O=C(C1CCCN(C1)C2CCN(CCC3=CC=CC=C3)CC2)C4:      | 0.254376 | 0.230901 |
| OIWVPWJASBFTOV  | CCN(CC)CCN=C(S)NC1=CC=C2N=C(C=C(C)C2=C1)N:     | 0.26556  | 0.248932 |
| FAXASVFSGHQOHP  | COC1=CC=C(C=C1)C2=CC(=NN2)C3=C(O)C=CC(C)=C     | 0.244006 | 0.230845 |
| ZOXQYFLPDQGM DX | CN1CCCC(CC2OC3=CC=CC=C3SC4=CC=CC=C24)C1        | 0.310309 | 0.293957 |
| OUCFZPJFLDVIFR  | OC=O.C1C\C(CCN1)=C2\C3=C(SC=C3)SCC4=CC=CC      | 0.259587 | 0.241073 |
| PZORWDLQCQBHBL  | CCN(CC)CCNC1=NCCN2C1=CC3=CC(OC)=CC=C23         | 0.303628 | 0.285332 |
| WSCOEDVASNROQD  | ClC1=CC=C(NC(=S)NC2CCN(CC3=CC=CC=C3)CC2)C:     | 0.322649 | 0.291657 |
| TYDPCFOMBQFAFW  | CCCN(CC(=O)NC1=CC(Cl)=CC(Cl)=C1)CC(=O)NC2=Ci   | 0.250017 | 0.254446 |
| XWEGKKKIRHQVSS  | CC(C)N(CCNCC(COC1=CC=C(C=C1)C(C)C)C2=CC=Ci     | 0.258558 | 0.261663 |
| PBDMGERAAPHHJC  | CN(C)CCNS(=O)(=O)C1=CC=C(C=C1)N2CCN(CC2)C:     | 0.291947 | 0.255667 |
| QYTLGHWFFIOPDG  | CCOC(=O)C1=C(NC(=O)CNCCN(C)C)SC=C1C2=CC=Ci     | 0.251506 | 0.22623  |
| MBHQKSKQJQNXFY  | COC1=CC=C(C=C1)C2=C[N+](=C3CCC4=C(C=CC=C4)     | 0.247002 | 0.24646  |
| BFHPGTOGFCEAS   | CCOC1=CC=C(OC2=C(\C=N\NC(=O)COC3=C(OC)C=C      | 0.255086 | 0.253014 |
| GJCKFQOJOGUGHY  | CC(C)(C)N1N=NN=C1C(N(CC2=CC=CO2)CC3=CC=CC      | 0.24776  | 0.252943 |
| WCVSEYBAUIPDKB  | CC1=CC=C(C=C1)C2=NN=C(CSC3=NN=C(COC4=C5C       | 0.241337 | 0.236438 |
| XOKVAQCOFZYPAN  | FC(F)C1=C/C(=N\C2=C(\C=N\N\12)C(=O)N3CCN(CC    | 0.302867 | 0.290517 |
| NWPWWINMTQWHBL  | CCOC1=C(OCC2=C(Cl)C=CC=C2)C(Br)=CC(CNCCCNC     | 0.26155  | 0.249079 |
| YBTUSMAEWFIBV   | COC1=C(OCC2=CC=C(Cl)C=C2)C(Br)=CC(CNCCCNC3C    | 0.275566 | 0.264386 |
| JZHIXFGGSZLEKB  | CCC(C)NCCOC1=CC=C(C=C1)C(C)(C)C2=CC=CC=C2      | 0.252739 | 0.227286 |
| KUNYYZPPEZEDAG  | CC1=C(C)C=C(C=C1)N=C(S)N(CCCN2CCCC2)CC3=CC     | 0.276562 | 0.255465 |
| NIHDZBOENNWHCN  | COC1=C(C=CC=C1)C2=NC(SCC(=O)N3CCCCC3)=C4C      | 0.266332 | 0.252856 |
| UHQWWMFSPGPEU   | CCCCN(CC)CCCNC(S)=NC1=CC2=C(C=C1)N=C(C=C2      | 0.294866 | 0.282564 |
| YDPZMUWTVKPGBB  | CCN1CCN(CC1)C2=NC3=C(C=C(C=C3)N=C(S)NCCCN      | 0.247559 | 0.231998 |
| YDJIFKISSQNAIS  | CN(C)CCCNC1=NC=C(C=C1)C2=NC=NC(NC3=CC(Cl)      | 0.270092 | 0.250211 |
| WSYSDMJVVVJKIH  | [O-][N+](=O)C1=CC=C(OC2=CN=CC=C2)C=C1)[N+](    | 0.28269  | 0.235532 |
| UBMWIWOZOGGSGI  | O=C(\C(CN1CCCC1)=C\C2=CC=CC=C2)C3=CC=CC=C      | 0.25506  | 0.224271 |
| BDTAOSJTPSFQD   | C1CC2CC3=C(CN2C1)C4=CC=CC=C4C5=C3C=CC=C        | 0.245401 | 0.223677 |
| POCHMWHMPRYMTC  | COC1=CC2=C(C=C1)C=C(CNCCOCCOCCNCC3=CC4=        | 0.259311 | 0.233996 |
| AEEZWHXVXFVAD   | SC(=N\N=C\C1=NC=CC=C1)N(CC2=NC=CC=C2)CC3:      | 0.287555 | 0.239087 |
| BTFYMPJMYCNLRM  | SC(NCC1=NC=CC=C1)=N\N=C\C2=NC=CC=C2            | 0.282726 | 0.249059 |
| FQWITMQQUMTMRE  | NC(S)=N\N=C\C1=C2C=CC=CC2=CC=N1                | 0.279837 | 0.246458 |
| TUHFYDGLBUXMEC  | CC(=C)C1=NC(OC2=CC=CC=C2)=NC(OC3=CC=CC=C:      | 0.318574 | 0.273908 |
| KKURDNASMPVGKT  | C\C(=N/N=C(S)N1CCCCC1)C2=C3N=CC=CC3=CC=C       | 0.254948 | 0.227328 |
| KLYOLLLMOLFUSQ  | CC(NN=C(S)N1CCN(CC1)C2=NC=CC=C2)C3=C4C=C       | 0.268482 | 0.228347 |
| VKRQERUBXPLFCD  | CN(C)C(S)=NC(S)=NC1=CC2=C(C=CC=C2)C=C1         | 0.322749 | 0.27482  |
| ZSMIAGRBYIUJAJ  | CSC(\N=C(\SCC1=CC=CC=C1)N(C)C)=N/C2=CC=CC=C    | 0.319266 | 0.281876 |
| FBWSJSWNFLJJJB  | CSC(S)=N\N=C(/C)C1=NC(C)=CC=C1                 | 0.276433 | 0.234662 |
| GHIMMECAKCIHTG  | C=C1CC2(OC1=O)C3=C(CCC4=C2C=CC=C4)C=CC=C       | 0.268211 | 0.224513 |
| ZQRFGIQOJKEYBU  | CCN(CC)CCC=C(C1=CC=CS1)C2=CC=CS2               | 0.279117 | 0.235644 |
| SKDKPMWRWWHHRD  | COC1=C(\C=N\NC(N\N=C\C2=C(OC)C=CC=C2)=N\N      | 0.281639 | 0.255748 |
| QDSXVYQCPUYEZ   | N(\N=C\C1=CC=CS1)C(N\N=C\C2=CC=CS2)=N\N=C\     | 0.250808 | 0.227884 |
| WXMFLZGDXLEMN   | OC1=C2N=CC=CC2=CC=C1CN3CCCCC3                  | 0.272038 | 0.236253 |
| ZYFVGABFAJUTDB  | CN(CC1=C(O)C(C)=CC(C)=C1)CC2=C(O)C(Cl)=CC(Cl): | 0.262857 | 0.230329 |
| KJPKPBMWHKBKHG  | O=C(C(CN1CCCCC1)C2=CC=CC=C2)C3=CC=CC=C3        | 0.263941 | 0.225233 |
| VYVDPFREHHCGMM  | CC(=O)OC1=CC=C(C=C1)C23C4=C(C=CC=C4)C2(OC      | 0.295103 | 0.266265 |

|                 |                                                |          |          |
|-----------------|------------------------------------------------|----------|----------|
| FAPPLTQTFIVGDU  | OC1=C(C=CC=C1)C2SC(SC(S2)C3=C(O)C=CC=C3)C4:    | 0.297957 | 0.249339 |
| ZHPDKZWRWNETEN  | COC1=C(NS(=O)(=O)C2=C(Cl)C=CC(N\C(=N)\S(=O)=C  | 0.254276 | 0.25622  |
| FMGRGIOUUGFHJP  | CC1=CC(C)=C(C=C1)[N+]2=C3CCC4=C(C=CC=C4)N3     | 0.248609 | 0.22686  |
| XHPUYICJDOILJN  | CN(C)C1=CC=C(C=C1)[N+]2=C(=CC(=CC2C3=CC=CC:    | 0.247747 | 0.262023 |
| LLCHPKABGFRGHB  | COC1=CC=C(C=C1)[N+]2=C3CCC4=C(C=CC=C4)N3C      | 0.239064 | 0.229258 |
| YFYTWDJVYRDONY  | CCOC1=CC=C(C=C1)[N+]2=C3CCCCCN3C=C2C4=CC       | 0.265502 | 0.269271 |
| KMZJWZKHQPPHCT  | COC1=CC=C(C=C1)[N+]2=C3CCC4=C(C=CC=C4)N3C      | 0.242011 | 0.233558 |
| JVPKVEYRQGOPSJ  | CC1=NN(C(C)=C1NS(=O)(=O)C2=CC3=C(C=CC=C3)C:    | 0.279681 | 0.249951 |
| VKOGOVIJXOGKGCJ | CCOC1=C(C=CC=C1)N2CCN(CC2)C(S)=NC(=O)C34C      | 0.263906 | 0.240339 |
| UFAZASYMNCMYTC  | CN1C=NC(=C1S(=O)(=O)OC2=CC=CC=C2)[N+](O-)=     | 0.268915 | 0.232912 |
| OHUYUZQKKZNYPY  | COC1=CC2=C(SC(=C2C3=CC=C(OCCN(C)C)C=C3)C4:     | 0.304434 | 0.301066 |
| SOVQSFQUOYHQMZ  | FC1=CC=C(C=C1)N2CCN(CCCNC(=O)CN3CCN(CC4=       | 0.238517 | 0.227538 |
| JIOZLNOPICWVHE  | CC1CCN(CCCNC(=O)C2=CC=C(CSCC3=CC(Cl)=CC=C:     | 0.281381 | 0.237617 |
| NFTHRRMLFWIHQO  | CC1=C(C)C=C(NC(=O)CSC2=NC3=C(C=CC=C3)C(=O)I    | 0.252901 | 0.244882 |
| ZHPGEAXFYDMERE  | COC1=CC(NC(=O)C2CCN(CC3=C(N4C=CC=C4)N(N=C      | 0.275065 | 0.237566 |
| WNCALWIAHXATTF  | COC1=CC(NC(=O)C2CCN(CC3=C(N4C=CC=C4)N(N=C      | 0.250651 | 0.23897  |
| UFMJAGNPIYFMFZ  | O=C(N1CCN(CC2=CC=CC=C2)CC1)C3=CC=C(CNS(=C      | 0.24445  | 0.232992 |
| VOGUHDWNNRBEF   | CC1=C(CN2C=CC=C2C3=NC(CO3)C4=CC=CC=C4)N=       | 0.245446 | 0.222908 |
| BUCHHVOLSDDWQM  | CN(CC1=CC=CC=C1)C(=O)C2CCN(CC3=CC=C(Cl)C=      | 0.253126 | 0.230069 |
| LCCSPYUGQUDIOH  | COC1=CC=C(C=C1)C2N(C)CCC3=C2C4=C(CCN(C)C4      | 0.326852 | 0.298524 |
| HHFTZXSANTTSL   | COC1=CC=C(CN2CN=C(NC3=NC(C)=CC(C)=N3)N(CC      | 0.312181 | 0.269586 |
| KABGULJJPRGKSF  | NC1=NON=C1C(=O)NCCNCC2=C3C=CC=CC3=CC=C:        | 0.285449 | 0.233275 |
| TZFAMUNSQMIJVV  | C1S2=NN=C(N2N=C1C3=CC=C(C=C3)C4=CC=CC=C        | 0.259765 | 0.232875 |
| CDJWSJVYCFGVKO  | [O-][N+](=O)C1=C(Cl)C=CC(=C1)C(=O)N(CC2=CC=C(C | 0.246616 | 0.24538  |
| RWUIVHVVFWEECH  | O=C(CCN1CCN(CC2=CC=CC=C2)CC1)NC3=CC=C(OC       | 0.261332 | 0.232451 |
| STFNAPXAWAEXNC  | CCN(CC)CCNC(=O)C1=C(C)N(C2=C1C=C(OC)C(Br)=C    | 0.255659 | 0.261938 |
| RFIYUELTRBMMNL  | COC1=CC2=C(NC(C)=C2C(=O)CN3CCN(C\C=C\C4=C      | 0.255639 | 0.238185 |
| GUEZCQOOEUTMJF  | CCOC1=C(OC)C=C2C(NCCC3CCOCC3)=NC(=NC2=         | 0.247902 | 0.232933 |
| NKZYFXVHBRNDO   | CN1CCN(CC1)S(=O)(=O)C2=C(C)C=CC(=C2)C3=C4C=    | 0.242133 | 0.226224 |
| GMVQRRVCNWDLLT  | CCCOC1=CC=C(C=C1)C(=O)C(CN2CCCC2)C3=CC=CC      | 0.243618 | 0.228015 |
| MEPXQVRXJLIKQB  | COC1=C(OCC2=C(F)C=CC=C2)C=CC(CNCCC3=CNC4       | 0.273988 | 0.254527 |
| UNOAJOUPOZILR   | COC1=C(OCC2=C(Cl)C=CC=C2Cl)C=CC(CNCCC3=NC=     | 0.283663 | 0.250773 |
| XLXROIVENNXDG   | CC(C)C(=O)N1CCN(CC1)C2=C(Cl)C=C(NC(=O)C3=CC    | 0.238835 | 0.22294  |
| ALDVIBYUEOPTBH  | CC1=CC=C(C=C1)C2=NOC(CSC3=NN=C(N3C4=CC=C       | 0.264636 | 0.243165 |
| XWNIJANSHVBAPT  | CC1=CC=C(C=C1)C2=NOC(CSC3=NN=C(CCC4=CC=C       | 0.286341 | 0.273207 |
| ZMVOSXWFIBSYRX  | COC1=C(C=C(C=C1)S(=O)(=O)NC2=CC=C(C)C=C2)N(    | 0.258807 | 0.236602 |
| VDOIXPOUDOFLHO  | COC1=C(C=C(C=C1)S(=O)(=O)N2CCCCC2)N(C)S(=O     | 0.248284 | 0.256118 |
| LIGUMGRSVBLBKG  | CCC(=O)C1=CC=C(OCC(O)CN2CCN(CC2)C(C3=CC=C      | 0.256523 | 0.247423 |
| SOEYUDFSHJCWTE  | Cl.CCOC1=CC(CNCCC2=CC=C(C=C2)S(N)(=O)=O)=CC    | 0.310624 | 0.273608 |
| UDOZJWJRQUAFRO  | Cl.CCOC1=CC(CNCC2=CC=NC=C2)=CC(Br)=C1OCC3      | 0.249491 | 0.228148 |
| UTTIUDCHDUGGQB  | COC1=C(OCC2=CC=C(Cl)C=C2)C=CC(CNCCC3=CC=C      | 0.274209 | 0.236019 |
| CNGCLFKQUQPLB   | COC1=C(OCC2=C(F)C=CC=C2)C(Br)=CC(CNCCC3=CC=    | 0.268126 | 0.246512 |
| UKWQQECMOSVMNZ  | COC1=C(OCC(=O)NC2=CC(=CC=C2)C(F)(F)C=CC(Cl     | 0.275889 | 0.225594 |
| FVSMZXPZIKTWEG  | CCOC1=C(OCC2=C(Cl)C=C(Cl)C=C2)C(Br)=CC(CNC(C   | 0.252049 | 0.230189 |
| POWVYVDIGCYLAJ  | CC1=C(C)C2=C(S1)N=CN=C2N3CCN(CCO4=CC=C(C       | 0.252601 | 0.25909  |
| JCFWLXAYFIGFDY  | COC1=CC(OCCCN2CCN(CC2)S(=O)(=O)C3=CC=C(NC      | 0.270821 | 0.236135 |
| VTSCIKMVAOYQJV  | SC(NC1CCN(CC2=CC=CC=C2)CC1)=NC3=CC(Cl)=C(C     | 0.263864 | 0.248681 |
| CEGLMXXCTGCEDH  | ClC1=C(C=C(Br)C=C1)C(=O)NC2=C(C=CC=C2)N3CC     | 0.278651 | 0.283627 |

|                |                                               |          |          |
|----------------|-----------------------------------------------|----------|----------|
| ACGFRFTVPHBAR  | OCCNCC1=C(OCC2=C(CI)C=C(CI)C=C2)C=CC(Br)=C1   | 0.289463 | 0.284052 |
| SQLAYJLTBKSAB  | FC1=CC=C(NC(=O)C2=CN(N=C2C3=CC=NC=C3)C4=C     | 0.249412 | 0.240691 |
| GPUYCFVMTDOTMG | CC1CCCN(CCOCCOC2=C(Br)C=C(CI)C=C2)C1          | 0.282103 | 0.23456  |
| CRHCUAOLDLBHMX | CN(CCCCOC1=C(CI)C=CC(C)=C1)CC2=CC=CC=C2       | 0.336733 | 0.295621 |
| KATIPTFKORCOF  | COC1=CC=C(C=C1)N2CCN(CC2)C(=O)CCCN3C(=O)C     | 0.247366 | 0.224626 |
| NXCCEAXDSDHMQI | OC(=O)C(O)=O.CC1CCN(CCCOC2=CC=C(OCC3=CC=C     | 0.250045 | 0.222633 |
| VQSUVBKRLYSTOA | COC1=C(OCCCCN2CCN(CC2)C3=C(OC)C=CC=C3)C=      | 0.285972 | 0.269084 |
| DXKJLDCDDBTGGS | COC1=C(C=CC=C1)N2CCN(CC(O)COC3=CC4=C(CCC      | 0.239046 | 0.222784 |
| VXGJTMACCOZJHX | COC1=CC(OC)=CC(NC(=S)N2CCN(CC2)C(C3=CC=CC     | 0.249859 | 0.280489 |
| KGYWRBHKJVRKEV | CC1CC(N(C=O)C2=CC=C(CI)C=C2)C3=CC=CC=C3)C4    | 0.261146 | 0.228601 |
| REIDSGGUBCVQW  | FC(F)(F)C1=C(NC(=O)C2=CC=C(CN3CCC(CC4=CC=CC   | 0.283463 | 0.253921 |
| DALKRTJBJKPL   | CCC1=C(NC(=O)C2=CC=C(CN3CCC(CC4=CC=CC=C4)     | 0.27166  | 0.247455 |
| POXGDUMCZNRN   | COC1=C(OCC(O)CN2CCC(CC3=CC=CC=C3)CC2)C=C      | 0.264637 | 0.232873 |
| MYNSQDLETAOVJE | OC1(CCCCC1)C#CC2=CC=C(C=C2)C(=O)N3CCN(CC3     | 0.246534 | 0.225768 |
| MKGLHEFJSNUHSC | COC1=CC(CN(C)C(C2=NN=NN2C3=C(C)C=CC=C3)C4     | 0.284039 | 0.283493 |
| WFWWTRNJTQDJW  | [O-][N+](=O)C1=CC2=C(O\C=C/COC3=C(CI)C=C(CI)C | 0.251122 | 0.238898 |
| AWZHEICVGLZBJ  | CCN(CC)CCN1C(NCC2=NC3=C(C=CC=C3)N2CC4=CC      | 0.270905 | 0.241023 |
| KLRQIRDBMCPSPR | CC(C)(C)N1N=NN=C1C(N(CC2=CC=CO2)CC3=CN=C      | 0.267492 | 0.24343  |
| BXJYYWCZOQPVNC | COC1=CC(=CC=C1)C2=CSC(=N2)N3CCN(CC3)C(\S)=    | 0.244818 | 0.236905 |
| GYLLOWIYVUZCT  | COC1=C(C=CC=C1)C(N2CCN(CC2)C3=C(C)C(C)=CC=    | 0.290895 | 0.268461 |
| BHRDJGZWRNNORC | CC(C)(C)N1N=NN=C1C(N(CC2=CN=CC=C2)CC3=C(C     | 0.268238 | 0.268824 |
| ASAIKGBIRKCLLU | CC(C)(C)N1N=NN=C1C(N(CC2=CC=CC=C2)CC3=CC=     | 0.268207 | 0.266058 |
| PKDQPZHGBXEAQY | CC(C)(C)N1N=NN=C1C(N(CC2CCCO2)CC3=CC=C(CI)    | 0.251745 | 0.240796 |
| KFNUXOPRMHDEF  | CCC(C)(C)N1N=NN=C1C(N(CC2=CC=CO2)CC3=CC=C     | 0.273363 | 0.262021 |
| MMFQCCJFVLDKCI | CC(C)(C)C1=CC=C(CN2C3=NC3C4=C2C=CC=C4         | 0.245869 | 0.23924  |
| HWNCNYMVSQNVOB | CCC(C)(C)N1N=NN=C1CN2CCN(CC2)C(C3=CC=CC=C     | 0.268214 | 0.24954  |
| LPXYGVAQIOTYKW | CN(\C=C\C1=[N+](C)C2=C(C=CC=C2)C1(C)C)C3=CC=  | 0.296228 | 0.262073 |
| JZRHAPUVZGGWOG | CC1=CC=C(C=C1)CN2CCN(CC2)CC=3C=C(C=CC3[N      | 0.25805  | 0.22921  |
| DMYSGPNXOWSMGP | CC1CCN(CC1)C(C2=NN=NN2CCC3=CC=CC=C3)C4=C      | 0.26786  | 0.269977 |
| MKHUUMRWZZFAQU | CCOC1=CC=C(C=C1)C(O)CN2C(=N)N(CCN3CCCC3)      | 0.279893 | 0.223999 |
| DUWSOQYQDUYMDE | CCN(CC)CCOC(=O)C(OC(C)C)(C1=CC=CC=C1)C2=C     | 0.334821 | 0.303677 |
| JRPWIKCYHWOKAZ | CC(C)(C)N1N=NN=C1CN2CCN(CC2)C(C3=CC=CC=C      | 0.283754 | 0.284923 |
| AWUBMIIAJHGFQS | CCCC1=C(N=C(N\N=C\C2=NC=CC=C2)S1)C3=CC=C      | 0.253002 | 0.225299 |
| AEESOEJLSASDMP | CCN(CC)S(=O)(=O)C1=CC=C2C(=C1)C(=NO)C=3C2=C   | 0.247014 | 0.246197 |
| ALJGMAYETVKWCM | CCCCN(C)C(=O)C1CCN(CC2=CC=C(OCC3=CC=CC=C      | 0.256689 | 0.243233 |
| WFWSSBLAKXMSHT | CCCCNC(=O)C1CCN(CC2=CC=C(OCC3=CC=CC=C3)C      | 0.243114 | 0.231765 |
| WDORARNTCODBGU | COC1=CC=CC=C1N2CCN(CC2)C(C3=CC=CC=C3)C4=C     | 0.284236 | 0.258942 |
| IHTIAVMXLQAPNF | COC1=C(C)C=C(C=C1)S(=O)(=O)N2CCN(CC2)S(=O)    | 0.275313 | 0.264527 |
| IHDTVQWTNDELLP | COC1=CC=C(C=C1)C2=C(C3=C(S2)C=CC=C3)C4=CC=    | 0.292588 | 0.274861 |
| GLBKTSMZCIBQGM | COC1=CC(=CC=C1)C2=C(C3=C(S2)C=CC=C3)C4=CC=    | 0.262615 | 0.237985 |
| HQDXGLXETMQWFK | CN(C)CCOC1=CC=C(C=C1)C2=C(SC3=C2C=CC=C3)C     | 0.261521 | 0.237251 |
| ZLJCFEHKTHXYOP | C(CN1CCCC1)OC2=CC=C(C=C2)C3=C(SC4=C3C=CC      | 0.295545 | 0.27211  |
| GQKRYQCHDLPPRE | COC1=CC2=C(C=C1OC)C(=C(S2)C3=C(OC)C=CC=C3)    | 0.278824 | 0.248626 |
| GSFVSUDIBTYRBH | COC1=CC2=C(SC=C2C3=CC=C(OCCN(C)C)C=C3)C4=     | 0.255238 | 0.224249 |
| JHFZIOXMCPUGLO | COC1=C(C=CC=C1)C2=C(C#CC3=CN=CN3C)C4=C(S2     | 0.241954 | 0.223182 |
| GGIYASBPSGCVHI | COC1=CC=C(C=C1)C2=C(C#CC3=CN=CN3C)C4=C(S2     | 0.255087 | 0.244944 |
| TXINADOSPSEZFG | COC1=CC2=C(C=C1)C=C(N=C2)C3=CC(OC)=CC(OC)=    | 0.256892 | 0.23107  |
| UIICMRMNONXVGY | CN1CCN(CC1)C(=O)CCN2C(=S)S\C=C\C3=CC=C(F)C    | 0.267655 | 0.235357 |

|                 |                                                           |          |          |
|-----------------|-----------------------------------------------------------|----------|----------|
| SLEZRUPRYHGPTI  | COC1=CC=C(C=C1)C(CNC(=O)C2=CC=C(C=C2)S(=O)(               | 0.246032 | 0.222452 |
| WKPNCXXQVJSLT   | COC1=CC=C(C=C1)C(CNC(=O)C2=CC3=C(CCC(C)C3)                | 0.261677 | 0.225574 |
| YAWMZCKLDJDBHO  | CN(C)C(CNC(=O)C1=CC(=CC=C1)S(=O)(=O)N2CCN(C               | 0.256145 | 0.223428 |
| PAPGWSJQNKUAIP  | COC1=C(OC)C(CN(C)C(=O)C2=CC(=CC=C2)S(=O)(=O)              | 0.259225 | 0.23123  |
| YNRKHUHPBRXTSE  | O=C(NC1=CC(=CS1)C2=CC=CC=C2)C3=CC=CO3                     | 0.251831 | 0.228109 |
| XSFQETONKAKIRH  | CN1CCN(CC1)C2=C(NC(=O)C3=C(C)C4=C(O3)C=CC(                | 0.275511 | 0.229104 |
| UVDMCAVZGBWMOW  | CCN1CCN(CC1)C2=C(C)C=C(NC(=O)C3=C(OC)C=C4(                | 0.27093  | 0.234377 |
| MGOXGEYNAGHIIG  | COC1=CC(=CC=C1)N2CCN(CC2)C3=C(C=C(C=C3)S(=                | 0.262989 | 0.243059 |
| YPTLBORUSUHUOA  | COC1=C(OC)C=C(CN(C)C2=C(C=C(C=C2)S(=O)(=O)N:              | 0.292414 | 0.256415 |
| GGEDFXAKTRZLPC  | CC(C)C[C@H]1CN=C(NC2=CC=CC=C2)N1CCCC3CC(                  | 0.243869 | 0.234065 |
| OFUMMVWXZVSCDV  | CCN1CCN(CC1)C2=CC=C(NC3=C4C=CC=CC4=NC=C                   | 0.307023 | 0.266577 |
| DUCMTCXRNAFIQO  | CCC1=CC=C(OCCNC2=C(C=CC(=C2)N3CCNC(C)C3)]I                | 0.280153 | 0.263361 |
| SKNIMWACWJQXID  | CCOC(=O)C1(CCN(CCC(=O)NC2=CC(Br)=CC=C2)CC1                | 0.290397 | 0.255034 |
| LTHBJHFXNJBMTQ  | COC1=CC2=C(NC(C)=C2CCNCC3=CN(C)C4=C3C=CC                  | 0.330624 | 0.286088 |
| QAECBDXCFKOMLD  | FC1=CC=C(C=C1)C(=O)C(CCCCC(CN2CCOCC2)C(=C                 | 0.270169 | 0.228778 |
| SZWDKYLRLWWCXMV | COC1=C(OCC2=CC=C(F)C=C2)C(Br)=CC(CNCCSC3=N                | 0.264112 | 0.236438 |
| BYVGHTJAPCUMAU  | CCOC1=C(OCC2=CC=CC=C2)C(Br)=CC(CNCCSC3=NI                 | 0.258371 | 0.243265 |
| DUBXCYUMCWFEIA  | CN(C)CCOC1=CC=C(NC2C3=C(CSC4=C2C=CC=C4)C:                 | 0.256799 | 0.235922 |
| HXOBKEJHWPCMOX  | OCl(=O)(=O)=O.[O-][N+](=O)C1=C(C=CC=C1)C2=[N+             | 0.254603 | 0.236647 |
| KCMOVBPDRGDKSU  | OCl(=O)(=O)=O.COC1=CC=C(C=C1)[N+] <sub>2</sub> =C(C=C(C=C | 0.285444 | 0.260996 |
| ROIQDQJQRXREPV  | OCl(=O)(=O)=O.FC1=CC=C(C[N+] <sub>2</sub> =C(C=C(C=C2C3=C | 0.260495 | 0.230712 |
| JNGBTISOFZDKDB  | OCl(=O)(=O)=O.ClC1=CC=C(C[N+] <sub>2</sub> =C(C=C(C=C2C3= | 0.269991 | 0.246466 |
| WQWNQUNQRPJPC   | CN(C)CCN(C(=O)C1=C2C=CC=CC2=CC=C1)C3=NC4=                 | 0.241567 | 0.236129 |
| AVOROEGEYAGDGQ  | Cl.CN(C)CCCN(C(=O)C1=C/C=C(\C=C\1)S(=O)(=O)N2             | 0.287397 | 0.274232 |
| OKTMFRKTDSCKQO  | Cl.CN(C)CCCN(C(=O)C1=C/C=C(\C=C\1)S(=O)(=O)N2             | 0.276798 | 0.266508 |
| LTYWSFWKTFEVPP  | CCOC1=CC=CC2=C1N=C(S2)N(CCCN(C)C)C(=O)C3=(                | 0.245024 | 0.224146 |
| FKTZJXIWJXXAPE  | CN(C)CCCN(C(=O)C1=CC=C(C=C1)S(=O)(=O)N2CCCC               | 0.248061 | 0.227532 |
| UJRUBNLOVCQMRB  | CN(C)CCCN(C(=O)C1=C2C=CC=CC2=NC(=C1)C3=CC                 | 0.258798 | 0.231616 |
| IWWLICALWBJNSIU | CCOC1=CC=CC2=C1N=C(S2)N(CCCN(C)C)C(=O)C3=(                | 0.24751  | 0.230713 |
| IXBJJZUFXKRYAE  | CN(C)CCCN(C(=O)C1=CC=C(C=C1)S(=O)(=O)N2CCCC               | 0.264334 | 0.232719 |
| TXUFZZUOCTZYJH  | Cl.CN(C)CCCN(C(=O)C1=C/C=C(\C=C\1)S(=O)(=O)N2             | 0.267407 | 0.26175  |
| KAEOSBXRKKEEV   | CN(C)CCCN(C(=O)C1=CC=C(C=C1)S(=O)(=O)N2CCCC               | 0.265124 | 0.236978 |
| SBLDHEVXEWMANF  | CN(C)CCCN(C(=O)COC1=CC=C(Cl)C=C1)C2=NC3=C(                | 0.264015 | 0.235167 |
| UOTCPKSPHQQ     | CCN(CC1=CC=CC=C1)S(=O)(=O)C2=CC=C(C=C2)C(=C               | 0.260522 | 0.230616 |
| FVOFQSYXVYDDB   | CN(C)CCCN(C(=O)C1=CC2=C(CCCC2)C=C1)C3=NC4:                | 0.280487 | 0.249136 |
| FZJNTEQDWSFMNL  | CN(C)CCCN(C(=O)C1=COCCO1)C2=NC3=C(S2)C=C(E                | 0.275734 | 0.250734 |
| CLRFIEWSDSOYIS  | CCN(C1=CC=CC=C1)S(=O)(=O)C2=CC=C(C=C2)C(=O)               | 0.252298 | 0.227519 |
| DYXQUXUYUXXNO   | CN(C)CCCN(C(=O)C1=CC=C(C=C1)S(=O)(=O)N(C)C2C              | 0.275904 | 0.252726 |
| QJOVEDKWCJOBQV  | CN(C)CCCN(C(=O)C1=CC2=C(OCCO2)C=C1)C3=NC4                 | 0.261444 | 0.226782 |
| DJZHAASERPCFC   | CN1CCN(CC1)C2=NN=C(C=C2)C3=CC(NC(=O)COC4:                 | 0.258871 | 0.241287 |
| HOVUEWSGLRURJL  | CN1CCN(CC1)C2=NN=C(C=C2)C3=CC(NC(=O)COC4:                 | 0.253686 | 0.223462 |
| HJUVJMSPHVGNCJ  | CCC1=CC2=C(C=C1)N=C(S2)N(CCCN(C)C)C(=O)C3=C               | 0.246333 | 0.226814 |
| YJTSNDABJLKQKP  | COC1=C(NC(=O)NC2=NC(CC(=O)NC3=C(OC)C=C(C)C                | 0.283102 | 0.238241 |
| RUJSHAUPVUAXDM  | COC1=C(NC(=O)NC2=NC(CC(=O)N3CCN(CC3)C4=C(                 | 0.246165 | 0.223266 |
| GRTDCVKGLAJLB   | COC1=C(NC(=O)NC2=NC(CC(=O)N3CCN(CC3)C4=CC                 | 0.271285 | 0.242654 |
| YORRTVYDYMZFM   | CCN(CC)CCNC(=O)C1=CC=C(NC(=O)C2=CN(N=C2C3                 | 0.265489 | 0.255911 |
| DONIJVVJKXUIR   | CC(NC(S)=NC1CCCC1)C2=C(C)C=CC(C)=C2                       | 0.305547 | 0.265596 |
| DDOYOGJJZUJWSQ  | COC(=O)C1=CN(C=C(C1C2=CC(OC)=CC=C2)C(=O)OC                | 0.283392 | 0.252152 |

|                 |                                              |          |          |
|-----------------|----------------------------------------------|----------|----------|
| DTEWCMYGXOZQX   | [O-][N+](=O)C1=CC(NC(=O)NC2=CC3=C(CCC3)C=C2) | 0.239262 | 0.226951 |
| KQBMETCMIIYQPE  | FC1=CC(NC(=O)NC2CCCCC2)=CC=C1                | 0.239539 | 0.237794 |
| MFLNRTKARSUFLO  | SC(NC1CCN(CC2=CC=CC=C2)CC1)=NC3=CC(Cl)=CC    | 0.282174 | 0.249414 |
| RMLDFBSTXJIBGG  | ClC1=C2N=C(C=C(C(=O)N\N=C\C3=CN=CC=C3)C2=(   | 0.271496 | 0.258917 |
| DZKPHHMCPRGNLD  | ClC1=CC=C(C=C1)N2CCN(CC2)C(=O)NC3CCCC3       | 0.240041 | 0.232808 |
| VGNBTOMRNPGLG   | OC1=CC=C(NC(=O)C2=CC=C(NC(=O)C3=CC=CS3)C=(   | 0.239731 | 0.228038 |
| DOBZEONUJACQKA  | CC(C)(C)C1=CC=C(C=C1)C(=O)ON=C(N)C2=NC=CC=C  | 0.241333 | 0.245259 |
| GAOFHEWOWSMUCM  | FC(F)(F)C1=C(NC(=O)CN2C3CCCC2CC(C3)NC(=O)C4  | 0.255302 | 0.223817 |
| GXFAQSFFENFHCG  | COC1=CC(=CC=C1)C(=O)NC2CC3CCCC(C2)N3CC(=C    | 0.244336 | 0.235289 |
| MDXBSQDWOQSRFD  | CN1CCN(CC1)C2=C(Cl)C=C(NC(=O)C3=CC=C(O3))[N- | 0.252693 | 0.2331   |
| ZTRXFNYQKYIUPF  | CC(NC(S)=NC1CCCC1)C2=CC=C(C=C2)C(C)(C)C      | 0.242923 | 0.227013 |
| BGTNQCWYXQNPV   | CCOC1=CC=C(C=C1)C(C)\N=C(/S)NCC2=CC=C(F)C=C  | 0.276061 | 0.27168  |
| AJMAIBOMZGOQKJ  | CCC1=CC=C(C=C1)C(C)\N=C(/S)NCC2=CC=C(F)C=C2  | 0.261415 | 0.23879  |
| KADBDPLNZVMZIZ  | SC(NC1CCN(CC2=CC=CC=C2)CC1)=NC3=CC=C(Br)C    | 0.307648 | 0.265786 |
| MNIXWTWZNOKBKZ  | CCC1=CC(=C(OC)C=C1)S(=O)(=O)NC2=CC=C(CC3=C   | 0.252977 | 0.233234 |
| RNJSIRHZODXFS   | CCOC1=CC(NC(=O)C2CC2)=C(OCC)C=C1NC(=O)C3=    | 0.269918 | 0.228587 |
| JXLNILKAXGFVFB  | CN1CCN(CC1)C(=O)CCN2C(=S)S\C(=C/C3=CC(Br)=C  | 0.265355 | 0.228804 |
| AAQDANSDDLBBNH  | COC1=C/C=C\C=C\1)N(C(C(=O)NC2CCCC2)C3=C/C    | 0.247975 | 0.235887 |
| CWXFBBLKWFGUOA  | CC1=C(N=C(NC(=O)CN2CCCC2)S1)C3=CC4=C(C=C3    | 0.242275 | 0.23064  |
| ROXSVTHVYLYGQN  | COC1=CC=C\C=C2\SC(=S)N(CCC(=O)N3CCN(C)CC3    | 0.252287 | 0.230937 |
| KYPNRQRUJSJAIR  | FC1=C/C=C\C=C\1C(=O)N2CCC3=C\C(=C/C=C2/3)\(  | 0.372312 | 0.379318 |
| CTHUZLIUSZTHMB  | COC1=C(OC)C=C2CN(CCC2=C1)C3=C(C=CC=N3)[N+    | 0.248728 | 0.22311  |
| SQLSTWVWXOCLOD  | COC1=CC=C(C=C1)C2C3=C(OC4=C2C(=N)N(CCN(C)    | 0.281696 | 0.245119 |
| KOUSBZMTRLNIFB  | CN(C)CCCNC1=NC=NC2=C1C(=C(O2)C3=CC=CC=C3     | 0.264123 | 0.235826 |
| CSKLCXHKHIKWDL  | COC1=C(C=CC=C1)C2C3=C(OC4=C2C(=N)N(CCN(C)    | 0.272383 | 0.243021 |
| VGJCPUJNUJHWDU  | CC(C)C(CCN1CCN(C)CC1)C2=CC=C(Cl)C=C2         | 0.271519 | 0.244809 |
| CPGFYXCUVMTLJF  | CC(C)CCC(CCNCC1=NC=CC=C1)C2=CC=C(Cl)C=C2     | 0.247754 | 0.222811 |
| WIUJOZTZDSBSCB  | CC(C)C(CCNCC1=NC=CC=C1)C2=CC=C(Cl)C=C2       | 0.275418 | 0.229765 |
| LRIJTMWZNPBCOZ  | CN1CCC(CC1)NCCC(C2=CC=C(F)C=C2)C3=CC=C(Cl)   | 0.293413 | 0.276454 |
| PFBMOEVTKCJYLV  | CN(C)CCCNC(=O)C\C1=C(C)\C2=C3O/C=C\C\3=C(C   | 0.301684 | 0.31253  |
| HXIGEHHGZVUBWJV | FC1=CC=C(C=C1)C(CCN2CCOCC2)C3=CC=C(Cl)C=C:   | 0.271557 | 0.260916 |
| VZPVYMYKXNRNSK  | COC1=CC=C(C=C1)C2=NOC(CCCC(=O)NC3CCCC3)=     | 0.261932 | 0.228433 |
| SMWXXNBPZMKFOS  | COC1=C/C=C\C=C\1)C2C3=C/C=C4/C=C\C=C\C4=     | 0.359221 | 0.41072  |
| FYTBEHAACLDCSC  | BrC1=CC(=CC=C1)C2N3[C@@H](CC4=C2NC5=C4C      | 0.254398 | 0.230457 |
| CVFDUSPRRDVDAK  | ClC1=CC=C(C=C1)C(CCN2CCCC2)CC3=CC=CC=C3      | 0.290511 | 0.263901 |
| WHNXQKIPNNLBQD  | OCCNCC1=C2C=CC=CC2=CC=C1OCC3=CC=C(Cl)C=(     | 0.28761  | 0.304266 |
| TXCOIOMQKZPPQM  | COC1=CC=C\C=C\N\NC2=C3C=C(Br)C=CC3=NC(C)=C:  | 0.240993 | 0.241353 |
| ZHKSHBSAJCOKAP  | OC1=CC(NC2=NC(=NC(=N2)N3CCOCC3)N4CCOCC4      | 0.257277 | 0.230776 |
| PKCIQDZGRVGTGO  | COC1=C(OC)C(CNCC2=C3C=CC=CC3=C(OC)C=C2)=(    | 0.241838 | 0.240706 |
| NDAPSSVOIVJURB  | FC1=CC\C=C\N\NC2=NC=NC(=C2)N3CCOCC3)=CC=C    | 0.24379  | 0.222437 |
| ZLRIKJMGXXQLFB  | CCOC1=CC=C(CN2CCN(CC3=CNC4=C3C=CC=C4)CC      | 0.256913 | 0.237432 |
| ZHPZSHVMZHNSBW  | COC1=CC=C(C=C1)C2=CSC(=N2)N(CCCN(C)C)C(=O)   | 0.272016 | 0.283163 |
| ZBJVJAVXHLRPPY  | CSC1=CC=C(CN2CCN(CC2)C3=C(C)C=CC=C3)C=C1     | 0.258721 | 0.234011 |
| OFUOEGQNHFUNKF  | COC1=C(C=CC=C1)N2N=C(CC2C3=CC=CC=C3)C4=C     | 0.243111 | 0.243451 |
| ACCMGQIBJRYVMD  | [O-][N+](=O)C1=CC=C(C=C1)N2CCN(CC3=CC(=CC=C  | 0.313462 | 0.260897 |
| CNOVTKOJJHFXXG  | COC1=CC=C(C=C1)C2=CSC(=N2)N(CCCN(C)C)C(=O)   | 0.295609 | 0.257954 |
| JFMVGTZHMZMOEEU | CN(C)CCCNC1(=O)C2=CC=CC3=CC=CC(C1=O)=C23     | 0.255108 | 0.232045 |
| ITNTXIROIJKNAX  | BrC1=CC(NC(=O)C2=CC=C(CN3CCC4=C(C3)C=CC=C    | 0.245546 | 0.239459 |

|                |                                               |          |          |
|----------------|-----------------------------------------------|----------|----------|
| JPFBRBOZKXOCNQ | CC1CN(CC(C)N1)C2=CC(NCCOC3=CC=C(Cl)C=C3)=C    | 0.242815 | 0.230031 |
| OWUUZSMCTWKDQE | CN1C2=C(C=C(C=C2))[N+](O)N(C)C1(C)C3=CC=      | 0.243938 | 0.239409 |
| YTBVBKJJZHNJFF | CC(C)CCNC(=O)C1CCN(CC2=CC(OCC3=CC=CC=C3)=     | 0.264955 | 0.230456 |
| CXXRTSRZMBHJJR | COC1=C(C=CC=C1)N2CCN(CC2)\N=C\3=CC(Cl)=CC     | 0.265669 | 0.229968 |
| KFJQYKWOBSTTA  | CC\N=C(/S)N1CCN(CC1)C2=NC(CC)=NC3=C2C4=C(C    | 0.243886 | 0.227567 |
| VKBQZSAOIDUDJG | [O-][N+](=O)C1=C(\C=N\N2CCN(CC3=CC=CC=C3)CC   | 0.247747 | 0.231705 |
| NMOLJCFDAQVRFO | CCOC1=C(OC)C=CC(CNCC2=CC(OC)=CC(OC)=C2)=C     | 0.272902 | 0.271138 |
| CVUOPNNMCJKVDV | CC(=O)OC1=C2C=CC=CC2=C(C=C1)N(C(C)=O)S(=O)(   | 0.247363 | 0.234027 |
| ZHTRWWCLHQXSRF | C(CN1CCOCC1)NC2=NC(NC3=CC=CC=C3)=NC(NC4=      | 0.27563  | 0.24245  |
| DDUHHVSVZVKCPO | OC1=C(\C=N\NC(=O)CN2CCOCC2)C3=C(C=CC=C3)C     | 0.256681 | 0.229338 |
| ROTPPERZHFRPH  | COC1=C(OC)C=C(CN2CCN(CC3=CC4=C(C=CC=C4)C=     | 0.305103 | 0.270265 |
| LYIBOGKIVCZEPH | CCN(CC)CCCN(C(=O)C1=CC=C(F)C=C1)C2=NC(=CS2    | 0.312641 | 0.29527  |
| AOKXQURIGCNUKW | CCN(CC)C1=C2C=CC=CC2=NC(=N1)C3=CC=CC=C3       | 0.262014 | 0.23703  |
| ZBCKEYDGRZTDT  | CC1=CC(NC2=NC(=NC(=N2)N3CCOCC3)N4CCOCC4       | 0.262762 | 0.246976 |
| ZRWBLXCLXQYXAH | COC1=C(C=CC=C1)N2CCN(CC3=CC=C(SC)C=C3)CC2     | 0.283411 | 0.256725 |
| DHKXDKGYBXRQV  | CCN(CC)CCCN(C(=O)C1=CC=C(OC)C=C1)C2=NC(=CS    | 0.321394 | 0.297017 |
| WCGNEUNDEPMGTB | BrC1=CC=C(CN2CCN(CC3=CNC4=C3C=CC=C4)CC2)      | 0.264469 | 0.244928 |
| PFNLTXPEWXUGPM | CCOC(=O)C1=CC=C(NC(=O)C2=CC=C(CN3CCC4=C(C     | 0.248925 | 0.227722 |
| BNEVHZDJSBDRX  | CC1=CC=C(NC2=C3C=C(C)C=CC3=NC(C)=C2)C=C1      | 0.265256 | 0.246169 |
| NSPFQFRJDFLOGQ | COC1=CC=C(NC2=C3C=C(OC)C=CC3=NC(C)=C2)C=C     | 0.279839 | 0.254512 |
| DJTKIILFRBLODT | [O-][N+](=O)C1=CC(=CC=C1)C2CC(=NN2C3=CC=CC=   | 0.253243 | 0.238519 |
| ANYPJMIYSNMPB  | C\C(=N/NC1=NC(C)=NC(=C1)N2CCCC2)C3=CC=C(f     | 0.2503   | 0.237766 |
| RHOPKNAPSLGREM | FC1=CC(NC(=O)NC2=CC(Cl)=CC=C2)=CC=C1          | 0.243988 | 0.247151 |
| OHNJUBVCPYDMTK | C1CN(CCO1)C2=CC=C(NC3=C4C=CC=CC4=NC(=N3)      | 0.279165 | 0.249215 |
| ZZLSURCVZHTTQF | ClC1=CC2=C(NC(COC3=CC=CC=C3)=N2)C=C1          | 0.264009 | 0.246112 |
| JMYLZKXFAKCSQR | CNC1=NC2=C(C=CC=C2)C(NCC3=CC=CC=C3)=N1        | 0.289783 | 0.263494 |
| DAIKYBWCCHUQB  | [O-]Cl(=O)(=O)=O.COC1=C/C=C(\C=C\1)/[N+]2=C/C | 0.278911 | 0.304751 |
| WTWQIRJUUIBKBL | BrC1=CC=C(C=C1)C(=O)NC2=CC3=C(OCCO3)C=C2      | 0.243561 | 0.227154 |
| SBWIYNYNJAKRHN | CC1=CC(NC2=NC(=CS2)C3=CC=C(Cl)C=C3)=NC=C1     | 0.242974 | 0.226794 |
| MZJMUFHIELJBQT | COC1=CC=C(C=C1)C2=CSC(=N2)N(CCCN(C)C)C(=O)(   | 0.246853 | 0.223785 |
| JMWXUYGKQRTIM  | COC1=CC(OC)=C(CNCC2=CC3=C(C=CC=C3)C=C2)C=     | 0.25738  | 0.254915 |
| PCUVKQPOGOOBGR | O=S(=O)(CCN1CCOCC1)C2=CC=C(OC3=CC=C(C=C3)     | 0.260815 | 0.241463 |
| QCNHHYSOAGAKW  | COC1=CC=C(CN2CCN(CC3=CC=C(C=C3)C(F)(F)F)CC    | 0.252662 | 0.225642 |
| PFYOKZAFMIWTQL | CC1=CC(C(C2=CC=C(O)C=C2)C3=CC(C)=C(O)C=C3C)   | 0.260619 | 0.233066 |
| XUGVAQQYXUOUNN | CCOC1=C(Cl)C=C(CNC(S)=NC2=CC=CC=C2)C=C1       | 0.254128 | 0.229408 |
| GNAOYSCNQZGVBP | FC1=CC=C(CNCCC2=CNC3=C2C=CC=C3)C=C1           | 0.276638 | 0.261634 |
| OAOXDMSWICFKHW | COC1=CC(OC)=C(CN2CCN(CC3=CC=C(C=C3)C(F)(F)F   | 0.245846 | 0.235279 |
| KSUUNRFHOPONSZ | C\C(=N/N=C(\N)S)C1=CC(=C(S1)C2=CC=CC=C2)C3=   | 0.289136 | 0.273566 |
| XUXFFVQPCZGDK  | CCN(CC)CCN1C(=N)N(CC(=O)C2=CC=C(C)C=C2)C3=    | 0.255332 | 0.223136 |
| VNGZFJXEGLRVGO | CC1CN(CC(C)N1)C2=CC(NCCOC3=CC=CC=C3)=C(C=     | 0.299824 | 0.266885 |
| KVNONDCPTRPNHC | [O-][N+](=O)C1=CC=C(CN2CCN(CC2)C3=CC=C(C=C3   | 0.291474 | 0.268684 |
| CTZRVLWWCNVIHZ | CCN(CC)CCCN(C(=O)C1=CC=CO1)C2=NC(=CS2)C3=(    | 0.276061 | 0.239755 |
| KGUZRVWUOOZVMN | Cl.CN(C)CCCN(C(=O)C1=C/C=C\O\1)C2=N/C(=C\S\2  | 0.300779 | 0.31749  |
| CBBLVOCYASNUSU | CN(C)CCC\N=C(/S)N1CCN(CC1)C2=NC(=CS2)C3=CC    | 0.32316  | 0.298162 |
| MKFGMSIDXGIITI | CCN(CC)CCC\N=C(/S)N1CCN(CC1)C2=NC(=CS2)C3=    | 0.321864 | 0.295104 |
| UEAVAZMVBWUWQR | CCN(CC)CCCN(C(=O)C1=CC=C(Br)C=C1)C2=NC(=CS    | 0.28295  | 0.26128  |
| DVJDXLQARYGDAZ | CN(C1=CC(NC(=O)C2=CC=C(CN3CCC4=C(C3)C=CC=     | 0.249458 | 0.222466 |
| LWUDFYXDCVQEFW | CCOC1=CC=C(NC(=O)NC2=NC(SCC)=NS2)C=C1         | 0.241107 | 0.235989 |

|                 |                                               |          |          |
|-----------------|-----------------------------------------------|----------|----------|
| QPQSTQFEFGCFFU  | CCN(CC)CCCN(C(=O)C1=C(F)C=CC=C1)C2=NC(=CS2)   | 0.291803 | 0.267314 |
| XPGJDFWJFAUJKV  | CCC\N=C(/S)N1CCN(CC1)C2=NC(=CS2)C3=CC=C(C)    | 0.267258 | 0.241836 |
| CRWPLZXAAQIQKO  | CN(C)CCC\N=C(/S)N1CCCN(CC1)C2=C(C=C3C=CC(C    | 0.267901 | 0.229224 |
| ITOFQOOZDWVBAP  | COC1=CC=C(C=C1)C2=CSC(=N2)N(CCCN(C)C(=O)(     | 0.244953 | 0.241229 |
| GJXFDRBSVMOVST  | CCN1C2=C(C=CC=C2)C3=C1C=CC(CNCCCN4CCOCC       | 0.262394 | 0.225849 |
| WXUSHHJQSJVXEJ  | C\N=C(/S)N1CCN(CC1)C2=NC(=CS2)C3=CC=C(Cl)C=   | 0.283617 | 0.280039 |
| RQJOQECENSPTND  | CC(C)C\N=C(/S)N1CCN(CC1)C2=NC(=CS2)C3=CC=C(Cl | 0.259028 | 0.267274 |
| FPOFNQBKOEIEEA  | COC1=CC(=CC=C1)C2=CSC(=N2)N3CCN(CC3)C(\S)=    | 0.268633 | 0.233444 |
| FJVVYRIPCWAORAE | COC1=C(C=CC=C1)N2CCN(CC3=CC=C(Br)C=C3)CC2     | 0.2649   | 0.230953 |
| XEMBTCUNACMZFD  | C\C(=N/NC1=NC(C)=NC(=C1)N2CCOCC2)C3=CC=C(Cl   | 0.269162 | 0.281963 |
| MFQPUFGHYQLDRC  | C\C(=N/NC1=NC(C)=CC(C)=N1)C2=CC=C(Br)C=C2     | 0.256096 | 0.261139 |
| ISEWSVBZRATECX  | CC(C)(C1=CC=CC=C1)C2=CC=C(OCC(O)CN3CCCC3)(    | 0.288373 | 0.255589 |
| FABUNCRPUMHTPR  | COC1=C(OC)C(CN2CCN(CC3=CC(Br)=CC=C3)CC2)=C    | 0.28326  | 0.279423 |
| DZGJTWCDDKZSYKY | CN(C)CCC\N=C(/S)N1CCCN(CC1)C2=C(C=C3C(C)=C(Cl | 0.257193 | 0.236726 |
| YXMIIEYJAFIPM   | O=C(CN1CCCCC1)NC(C2=CC=CC=C2)C3=CC=CC=C       | 0.261121 | 0.226038 |
| LJSIXDJBHLLWHD  | CN1CCN(CC1)C2=CC=C(NC3=C4C=CC(Cl)=CC4=NC=C    | 0.303473 | 0.271857 |
| LICYPTOKHVLFLU  | COC1=C(C=CC=C1)N2CCN(CC2)C(=O)C3=CC(=CC=C     | 0.243237 | 0.241719 |
| AHRVABCWBXYVJE  | COC1=C(C=CC=C1)\N=C(/S)N2CCN(CC2)C3=C(C)C(C   | 0.306042 | 0.260334 |
| SGBITSSLZOCNAP  | CCOCCC\N=C(/S)N1CCN(CC1)C2=NC(=CS2)C3=CC=C    | 0.275544 | 0.241787 |
| FSKSDDYTVAGMMN  | CCN(CC)CCC\N=C(/S)N1CCN(CC1)C2=NC(=CS2)C3=C   | 0.30875  | 0.285098 |
| LFQZRGHJOLHCGV  | [O-][N+](=O)C1=CC(=C(NC2=NC=C(Cl)C=C2)N=C1)[N | 0.248934 | 0.240099 |
| BWLWFTYUJPBAPC  | CC1=C(Cl)C=C(NC2=NC=C(C=C2)[N+](O)=O)C=C1     | 0.242943 | 0.241708 |
| RIVIXGROZDPFNF  | COC1=CC=CC(OC)=C1C(=O)NC2=C(C=CC=C2)N3CC(C    | 0.242268 | 0.223825 |
| UGHDYUBXCXCMFR  | CCOC(=O)C1=C(NCCCN(C)C)C2=C(N=C1)C3=C(C=CC    | 0.251059 | 0.241319 |
| VGBJXXVKWAWGRC  | CCCC(=O)NC(C1=CC=C(OC)C=C1)C2=C3C=CC=CC3=     | 0.248125 | 0.222648 |
| BITFYXYDSVPGFA  | FC1=CC=C(C=C1)C2=NN(CC3=C(Cl)C=CC=C3)N=N2     | 0.289046 | 0.252435 |
| RHMNEXKZSZPUMG  | CN(C)CCCNC1=NC=NC2=C1C(C)=C(C)N2CCC3=CC=C     | 0.26258  | 0.238023 |
| DLLSGBLSMPVTAR  | CCN(CC)CCCNC(=O)C1=CC=C(S1)N2CCCC2)C3=C(Cl    | 0.269329 | 0.238105 |
| MMXGXIVVWSANMS  | CN(C)C1=CC=C(\C=N\NC2=NC3=C(O2)C=CC=C3)C=C    | 0.270965 | 0.26515  |
| NPKZNTOZHCKVOH  | SC(NCCN(C1CCCC1)C2CCCC2)=NC3=CC=CC(Cl)=C      | 0.334905 | 0.314792 |
| OCVGPQWRSPURJS  | CCCC(O)(C(CN1CCOCC1)C2=CC=C(Cl)C=C2)C3=CC=C   | 0.267496 | 0.241784 |
| FGDPYKGIUAGQEH  | CCCC1=NC(=CC(C)=N1)N2CCN(CC2)C3=CC=CC=C3      | 0.295107 | 0.266207 |
| BKYIVNQKSIGXRM  | CC1=CC(CN2CCC(CNC(=O)NC3=CC(Cl)=C(F)C=C3)C    | 0.281294 | 0.248541 |
| VUDCRIRVGLIINY  | CC1=C(C=C(N1)C2=CC=C(F)C=C2)C(=O)N3CCN(CC3    | 0.300976 | 0.269561 |
| XPWPEKTXJVXIX   | COC1=C(NC(=O)NCC2CCN(CC3=CC=C(Cl)C=C3)CC2     | 0.241063 | 0.224497 |
| NNRMUSLLIKBBTF  | FC1=C(CN2CCC(CNC(=O)NC3=CC(Br)=CC=C3)CC2)C    | 0.26263  | 0.226011 |
| MBSXRUSJFAEHRG  | CCCCN(C)CCNC(=O)C1=CC2=C(S1)N(C)N=C2C3=CC=C   | 0.267007 | 0.244239 |
| YFGMDFJJYXETSM  | COC1=CC(=CC=C1)C2=NN(C)C3=C2C=C(S3)C(=O)NC    | 0.274756 | 0.234538 |
| KHRRAJSWMKPZAS  | CCN(CCCNC(=O)C1=CC2=C(S1)N(C)N=C2C3=CC(OC     | 0.285433 | 0.264325 |
| HXOVPCUOUQBBIK  | COC1=CC(NC2=C3C=CC=CC3=NC4=C2CCC4)=CC(O       | 0.248682 | 0.222891 |
| BQRLKZANJNANMD  | CCCN(CCC)CCCNC(=O)C1=CC2=C(S1)C3=C(C=CC=C     | 0.269952 | 0.234701 |
| XEVLACCZPZZGJT  | CCCCN(CC)CCNC(=O)C1=CC2=C(C=C1)C(Cl)=C3CCC    | 0.253847 | 0.2363   |
| AWLAVUPHQVCYJT  | CCN1C(=O)C2=C(SC(=C2)C(=O)NCCN(C)C)C3=C1C=C   | 0.286126 | 0.243151 |
| ZDJMLRLONVLBBO  | CCCCN(CC)CCCNC(=O)C1=C/C2=C(S\1)/C3=C/C=C\    | 0.349234 | 0.310505 |
| WDDVXGNECLUTE   | CCN(CC)CCCNC1=NC2=C(C=CC=C2)C3=NC(=NN13)      | 0.257128 | 0.225153 |
| YNYCCCCIGYKPGZ  | CCN(CC)CCCNC(=O)C1=C(SC2=CC=C(Cl)C=C2)C3=C(Cl | 0.267899 | 0.237876 |
| SSZPKFQNZNKWCD  | CCOC1=C(OCC2=CC=C(Cl)C=C2)C=CC(CNCC3=CC=C     | 0.290462 | 0.274933 |
| IEBHUWAFPRHWNL  | CC1=CC2=C(C=C1)N(CC(O)CN3CCCCC3)C4=C2CC       | 0.279333 | 0.238948 |

|                  |                                               |          |          |
|------------------|-----------------------------------------------|----------|----------|
| USPZQLNIMWQTEE   | COC1=CC(NC2=C3C=CC=CC3=NC4=CC=CC=C24)=C       | 0.251094 | 0.238691 |
| DAMPPXDFGMIGTC   | CN1C(CNC2=CC=C(Br)C=C2)=NC3=C1C=CC=C3         | 0.252015 | 0.225225 |
| UXDGHROWHOPKIL   | CCN(CC)CCNC(S)=NC1=CC2=C(C=C1)N=C(C=C2C)N:    | 0.279293 | 0.237463 |
| HDLNBEFFMKMYDP   | CCCCN(CC)CCNC(S)=NC1=CC2=C(C=C1)N=C(C=C2C     | 0.242266 | 0.230409 |
| CDPAADHJCKLJNH   | CCN1CCN(CC1)C2=NC3=C(C=C(C=C3)N=C(S)N(C)CC    | 0.283961 | 0.266213 |
| ODOVHNYXEOQRDQ   | CCCCN(C)CCNC(S)=NC1=CC2=C(C=C1)N=C(C=C2C)N    | 0.293734 | 0.252972 |
| LGMULVZWLGRMPF   | SC1=NC2=C(C=CC=C2)C(=O)N1CCCN3CCN(CC3)C4:     | 0.265665 | 0.230822 |
| MQHUFUXBAXMQAM   | Cl.CCOC(=O)C1=C(CN(C)C)/N(C)C2=C(O)\C(N=NC(N  | 0.260783 | 0.22417  |
| VXJWCJHMLDRQIN   | OC1=CC=C(C=C1)C2=CC(=NC(=N2)C3=CC=CC=C3)C     | 0.255147 | 0.231907 |
| IXGFDLKNLSPKQB   | COC1=C(OC)C(OC)=C(CN2CCN(CC3=CC(OC4=CC=C(C    | 0.258036 | 0.227316 |
| SZXONIJERUCDDL   | COC1=CC=C(NC2=C3C=CC=CC3=NC4=C2CCC4)C=C       | 0.271697 | 0.236232 |
| RJXSUDNVAHALJK   | CCOC(=O)C1=C(CSC2=CC=C(CC)C=C2)OC3=C1C(CN     | 0.246145 | 0.224565 |
| BHRJLUKNGZIPRN   | COC1=CC=C(C=C1)C(=O)ON=C(N)C2=CC=C(Br)C=C2    | 0.258284 | 0.245506 |
| GYKXPGJPKYFFTF   | COC1=C(CN2CCN(CC3=CNC4=C3C=CC=C4)CC2)C=C      | 0.291019 | 0.258203 |
| GZNLWQYOQRHZNH   | COC1=CC(OC)=CC(CNCCC2=CNC3=C2C=CC=C3)=C1      | 0.264446 | 0.246735 |
| FQAMOSMBTRUACZ   | CCN(CC)CCCCN1C2=C(SC3=C1C=CC=C3)C=CC=C2       | 0.347432 | 0.29707  |
| GCJYJDOVBMBSCE   | COC1=C\C=C(/C=C/1C)\C2=C\S/C(NC3=C/C=C\C(C)   | 0.262995 | 0.247234 |
| BOLSJMUPEQCJLH   | CCN(CC)CC(O)CN1C(C)=C(C2=C1C=CC(=C2)[N+][O-   | 0.307398 | 0.258852 |
| FNYAPDXDSVIDFZ   | CCOC(=O)C1=C(C)N(C2=C1C=C(OCCN(C)C)C=C2)C3    | 0.249572 | 0.252713 |
| ZJFOKJSDQHKEQ    | CN1CCN(CC1)C2=NC(NC3=CC=C(F)C=C3)=NC(NC4=     | 0.314444 | 0.281759 |
| OWNLMVNSQNECB    | CSC1=CC(NC(=O)C2=CC=C(CN3CCC4=C(C3)C=CC=C     | 0.270942 | 0.258924 |
| UEJXPSAODFFJD    | COC1=C(OC)C=C(C=C1)C(=O)ON=C(N)C2=CC=CC=C:    | 0.332315 | 0.315959 |
| HGXVDDVKAGBVNC   | COC1=CC=C(C=C1)C(CCNCC2=CC=C(C=C2)N(C)C)C3    | 0.324605 | 0.287457 |
| ZSDFFIMGQOYQT    | CC1CCN(CCCCOC2=CC=C(C=C2)C(C)C)CC1            | 0.243676 | 0.232134 |
| GWIGKMUIRGDAEF   | COC(\C(=N/O)C1=CC=C(Cl)C=C1)C2=CC=CC=C2       | 0.250606 | 0.23321  |
| BQRGVCUSYIEHMO   | CCCOC1=CC2=C(C=C1)C3=C(C=C(OCCC)C=C3)C2=N     | 0.260339 | 0.230681 |
| XDYSRIVVDQDQIV   | COC(=O)N1C2=C(CCC3=C1C=CC=C3)C=CC=C2          | 0.268464 | 0.230238 |
| FIXJAWHYMVGEC    | CN1CCN(CC1)C2=CC=C(NC(=O)C3=CC=C(OC4=CC=C     | 0.289519 | 0.255646 |
| ONKKDYJXTGAGJI   | FC1=C(CNC2=C3C=CC=CC3=NC(=N2)C4=CN=CC=C4      | 0.247664 | 0.235813 |
| ZACALRGLMFHCPU   | COC1=C(CN2CCN(CC2)C(C3=CC=CC=C3)C4=CC=CC      | 0.280904 | 0.255299 |
| KUAIKNGLESWEFE   | C(N1CCN(CC1)C(C2=CC=CC=C2)C3=CC=CC=C3)C4=     | 0.310114 | 0.275417 |
| DAJYCBWDMVKA EZ  | CCOC1=CC=C(CNCCN2CCCC2)C=C1                   | 0.296464 | 0.274543 |
| NTONURKZJLUF AV  | CC1=CC(C)=C(C=C1)\N=C(/S)NCCC2=CC=C(Cl)C=C2   | 0.258772 | 0.228325 |
| SXHRGEIXIVPHSL   | N\C(=N/OC(=O)C1=C(C=C(Cl)C=C1)[N+][O-])=O)C2= | 0.270797 | 0.261743 |
| DFKUDGSHKQMFLA   | Cl.ON=C1C2=C/C(OCCN3CCCC3)=C\C=C\2\C4=C\      | 0.293451 | 0.253346 |
| OFZLIRIVOWNZBZ   | FC1=C(NC(=O)C2=CC=C(CN3CCN(CC3)C4=CC=CC=C     | 0.258982 | 0.226497 |
| NXKAANUEZJOF LD  | BrC1=CC=C(C=C1)N=NNC2=CC=CC=C2                | 0.242323 | 0.236329 |
| UDHPCSKJAVK OOC  | COC1=C(OC)C=C(\C=N\NC2=NC(=CC(C)=N2)C3=CC=    | 0.245012 | 0.240536 |
| DFBFIMGLDFNRJX   | CC1=C(C=CC=C1Cl)\N=C(/S)NCCC2=CC=C(Cl)C=C2    | 0.254808 | 0.238297 |
| JWJAVRXS B WYMIN | COC1=CC2=C(C=C1)C=C(C=C2)C3=NNC=C3            | 0.297934 | 0.308036 |
| ZLNCFBWKFOHGP    | CN(C1=CC=CC=C1)C2=C(Cl)C(C)=NC(=N2)C3=NC=C1   | 0.259798 | 0.239162 |
| SGXGHCIPPADGCD   | C(CN1CCCC1)NC2=C3C=CC=CC3=NC(=C2)C4=CC=       | 0.283139 | 0.266572 |
| SFLCOJSXUPYSML   | CC(C)N(C)C(C)C(=O)N1CCN(CC1)C2=C3C=CC(Cl)=C   | 0.266207 | 0.23671  |
| BDPUNHHPOHJBAE   | COC1=CC(\C=N\N=C(/S)NCCC2=CC=CC=C2)=CC(OC     | 0.279382 | 0.279879 |
| CCROLCXCZVRR LJ  | COC1=CC(=CC=C1)N2CCC3=C(C)N=C4C=CC(Cl)=CC     | 0.257403 | 0.224199 |
| GWQBMMQQR FARIX  | COC1=C(C=CC=C1)C2CCN(CC3=CC4=C(C=CC=C4)C:     | 0.260162 | 0.225976 |
| XAGQUXXKPOLDOJ   | CCOC1=CC=C(C=C1)C2=CN=C(NCC3=C4C=CC=CC4:      | 0.24713  | 0.235009 |
| NXJHVBQTAW EKDP  | COC1=C(CNC(C)CCC2=CC=CC=C2)C3=C(C=CC=C3)C     | 0.277862 | 0.266484 |

|                 |                                             |          |          |
|-----------------|---------------------------------------------|----------|----------|
| GTWXBYHHAIEPAP  | CN(C)CCNC(=O)C1=CSC(NC2=C3C=CC=CC3=CC=C2)   | 0.262711 | 0.231908 |
| JVFRFFOOSNRDIS  | OC1=C(CN2CCN(CC2)C(O)(C3=CC=CC=C3)C4=CC=C   | 0.267078 | 0.238809 |
| BTBCZXLAEONYQQ  | COC1=CC(CN2CCN(CC2)C(C3=CC=CC=C3)C4=CC=C    | 0.269471 | 0.259361 |
| FXOVIBPVLJUBH   | CN(CCC1=CC=CC=C1)CC2=CNC3=C2C=CC=C3         | 0.256659 | 0.222555 |
| JQQLPEVHIXSHCN  | COC1=C(OCC2=CC=CC=C2)C=CC(CN(CCN(C)C)CC3=   | 0.32119  | 0.29487  |
| MMRZDJRHCVDJCD  | CC(C)N(CC(O)COC1=C(C=CC=C1)C(C)C)CC(O)COC2= | 0.281974 | 0.259217 |
| OWSNUUWZYRMBCB  | CN(C)CCNC1=NC=NC2=C1C=C(S2)C3=CC=CC=C3      | 0.2808   | 0.25657  |
| GHKCUYOQOJIXEZ  | CC1=C2C=CC=CC2=NC(NCC3CCCC3)=C1             | 0.244754 | 0.227507 |
| AGGRIJMWXCXMZIX | COC1=CC=C(CNC2=C3C=C(OC)C=CC3=NC(C)=C2)C=   | 0.2446   | 0.232475 |
| LLAONCZFIOOLBA  | ClC1=CC=C(CNC2=CC=C(C=C2)N3CCN(CC4=CC=CC    | 0.271471 | 0.245125 |
| FAPGOSVHYQLFEO  | CN1CCN(CC1)C2CC3=C(SC4=C2C=C(Cl)C(F)=C4)C=C | 0.353638 | 0.316682 |
| GPRZDPJGSSBXME  | CN1CCN(CC1)C2CC3=C(SC4=C2C=C(F)C=C4)C=C(Cl  | 0.399864 | 0.349709 |
| SCFLHZZHVEZKS   | NS(=O)(=O)C1=CC=C(CCNCC2=C(OCC3=CC=C(Cl)C=C | 0.298097 | 0.279203 |
| AQGYXBXZRINPFW  | CC(C)C1=CC2=C(SC3=C(CC2N4CCNCC4)C=CC(F)=C:  | 0.299594 | 0.265079 |
| CQFNMVZADWUPL   | [O-][N+](=O)C1=CC=C(C2=CN(N=C2)C3=CC=CC=C3) | 0.288925 | 0.230312 |
| LSQRYZDRBPWXTJ  | CCOC1=CC=C(CNC2=CC=C(C=C2)N3CCN(CC4=CC=C    | 0.269269 | 0.235078 |
| DYJAZHBRHRTIQO  | FC1=CC=C(CNC2=CC=C(C=C2)N3CCN(CC4=CC=CC=    | 0.255243 | 0.237051 |
| DMEJWDPKCIUKQG  | COC1=C(OCC2=CC=CC=C2)C(Br)=CC(CNC(C)C3=CC=  | 0.275211 | 0.303427 |
| HCGKUKCQPZDMJD  | OC1=C(C=C(Br)C=C1)C2=CC=NN2C3=CC=CC=C3      | 0.268739 | 0.239903 |
| LOGJTUFUBPRCNQ  | COC1=C(OCC2=CC=C(F)C=C2)C(Br)=CC(CNC(C)C3=C | 0.256258 | 0.261425 |
| VJXKDSOBCYQHN   | CC(C)(CO)NCC1=C2C=CC=CC2=CC=C1OCC3=CC=C(I   | 0.259879 | 0.234271 |
| WADIXOUBCHKQIQ  | BrC1=C(CN2CCN(CC3=CNC4=C3C=CC=C4)CC2)C=C    | 0.281891 | 0.240279 |
| LSLZRFFCASZXC   | CN(C)C1=CC(C)=C(C=C1)\N=N\C2=CC=C(N)C=C2    | 0.288329 | 0.251106 |
| OAFFJWURAXUAAK  | COC1=CC(=CC(OC)=C1OC)C2=CSC(NC3CCCC3)=N:    | 0.264493 | 0.242634 |
| FAGWHYGBKPHGSL  | CC1CN(CC(O)COC2=C(C)C=CC=C2)CCN1CC(O)COC:   | 0.270432 | 0.233705 |
| IWELQSHVPPXCIO  | CN(C)C2(CNC(=O)NC1=CC(Cl)=C(Cl)C=C1)CCCC2   | 0.320725 | 0.305035 |
| CJYOGNCIFBDUBX  | NS(=O)(=O)C1=CN=C(C=C1)N2CCN(CCOC3=CC=C(Cl  | 0.241089 | 0.222903 |
| WQSJKFKDKTGKSBV | CC1CCCN(CC(O)COC2=CC=C(C=C2)C3=CC=CC=C3)(   | 0.337028 | 0.282569 |
| ITCUNKYUOLFRFB  | OC(COC1=CC=C(C=C1)C#N)CN2CCN(CC2)C3=C(Cl)C  | 0.267257 | 0.238622 |
| VYPZWWWVRCGDIMK | NC(N)=N\N=C\C1=CC(OCC2=CC=CC=C2)=C(OCC3=C   | 0.269251 | 0.237413 |
| WIMVUYIMFDPRIH  | SC(=NCCCN1CCOCC1)N2CCN(CC2)C3=CC=CC(Cl)=C   | 0.272001 | 0.259033 |
| IMVTXWGTGSCGQI  | COC1=CC=C(CN(C)CC(O)COC(C2=CC=C(OC)C=C2)C:  | 0.3157   | 0.295609 |
| CMUPNGQUIBIZOF  | COC1=C(C=CC=C1)N2CCN(CC2)C3=C4C=CC(Cl)=CC   | 0.31675  | 0.296756 |
| WTRMIJZSVOYJC   | CN(C)\C=N\C1=NC(=CS1)C2=CC3=C(C=CC=C3)C=C2  | 0.241473 | 0.230631 |
| XECCJSKVKMPDOS  | CCOC(=O)C1=C(C)NC(C(=O)OCC2=C(F)C=CC=C2)=C1 | 0.259761 | 0.238005 |
| YJVPHQFVPIMSIN  | C1CN(CCN1C2=NC3=C(C=CC=C3)C=C2)C4=NC=CC=    | 0.25588  | 0.245451 |
| RYOMGTNXPFHBB   | CN(C)CCCNC(S)=NCC(C1=CNC2=C1C=CC=C2)C3=C(   | 0.265949 | 0.247633 |
| ABROOOZQBGVEKG  | COC(=O)C1=CC=C(OCC(O)CN2CCC3=C(C=C(OC)C(O   | 0.260255 | 0.235948 |
| SYIBKYWIXGVQPD  | COC1=CC=C(C=C1)C(NC(=O)C2=C(OC)C=CC(OC)=C2  | 0.254309 | 0.22319  |
| JUHKKAOQMHXTRE  | COC1=C(OC)C=C(CCN(C)CC(O)COC(C2=CC=C(F)C=C: | 0.315742 | 0.290537 |
| RDKIYQXDMXFMCP  | COC1=CC(CN(C)CC(O)COC(C2=CC=CC=C2)C3=C(C)C  | 0.272633 | 0.24423  |
| BVENFMNYIOTMEI  | CCOC1=CC=C(CN(C)CC(O)COC(C2=CC=C(OC)C=C2)C  | 0.300889 | 0.285562 |
| UINVHAHNSNAZSP  | CC1=CN=C(NC(=O)NCC2CCCC(CNC(=O)NC3=NC=C(I   | 0.239986 | 0.223535 |
| PHDGPLDNPCUCGA  | COC1=C(OC)C(OC)=C(CN(C)CC(O)COC(C2=CC=CC=C  | 0.297088 | 0.264962 |
| IFTXFDVOSCKHCK  | COC1=C(OC)C=C(CN(C)CC(O)COC2=CC=C(C=C2)C3=  | 0.299978 | 0.25648  |
| GRILGNVIUNFCMS  | COC1=CC=C(C=C1)C(OCC(O)CNCCC2=CC=CC=C2)C:   | 0.253033 | 0.248936 |
| IOTJPQOUWORJET  | CN1CCN(CC1)C2=CC(C)=C(NS(=O)(=O)C3=CC4=C(C: | 0.305859 | 0.291788 |
| SZRWUQVACAZGHO  | COC1=CC=C(\C=C\C(=O)NC2=C(C=CC=C2)C(=O)NCC  | 0.255797 | 0.25382  |

|                 |                                             |          |          |
|-----------------|---------------------------------------------|----------|----------|
| FFZANWWIWPKASH  | CN(C)CCCNS(=O)(=O)C1=CC=C(C=C1)N2CCN(CC3=   | 0.265825 | 0.239189 |
| VKDMQKVSBOCZIQ  | CCCCNC(S)=NCC(C1=CNC2=C1C=CC=C2)C3=CC=CC    | 0.255725 | 0.230828 |
| AOHPZXYMKDSMLT  | CCOC(=O)C1=C(C)C(C(=O)OCC2=C(F)C=CC=C2)=C(C | 0.258615 | 0.260148 |
| UQZPLFLUUGHBOA  | CN1CCN(CC(O)COC(C2=CC=C(Cl)C=C2)C3=CC=C(Cl  | 0.258891 | 0.240347 |
| YVJFWWZNCXDTNS  | CC(N(C)CCOC1=CC=C(Cl)C=C1)C(=O)NC2=C(C)C=CC | 0.251341 | 0.226823 |
| ZSDPRZMPVINHHO  | BrC1=CC=C(C=C1)N2C=NC(=C2)C3=CC=CC=C3       | 0.251624 | 0.230423 |
| CEOHLJLDAZQMNT  | ClC1=C(Cl)C=C(NC(=O)NCC2CC2(Cl)Cl)C=C1      | 0.240818 | 0.227274 |
| ZJODBUNAXOHTHH  | COC1=C(CN(C)CC(O)COC2=CC=C(Br)C=C2)C=C(Br)C | 0.32022  | 0.28266  |
| BQQIGHILYUCELW  | OC(CNC1CCCCC1)COC2=C3C=CC=CC3=CC=C2         | 0.288645 | 0.290629 |
| JBKKGKCIZZUFNE  | OC1=C(C=CC=C1)N2CCN(CC2)C3=NC=NC4=C3C(=C    | 0.273542 | 0.245264 |
| LHUOLVDDERDQNF  | COC1=C(C=CC(SC)=C1)C(=O)NC2=CC3=C(CCC3)C=C  | 0.245107 | 0.237331 |
| YOHYDILJABSZKI  | CC1=NC(N\N=C\C2=CC=CC=C2)=NC(=C1)C3=CC=CC   | 0.268847 | 0.263003 |
| QIZKKBWPVZSWAD  | COC1=CC=C(C=C1)N2CCN(CC2)C3=C4C=C(OC)C=C(   | 0.315937 | 0.273654 |
| SGDQPSJNELHSAJ  | COC1=CC2=C(C=C1)N=C(C)C=C2NCC3=CC(=CC=C3)   | 0.267778 | 0.225    |
| JGPZOOUILAFLSU  | COC1=CC2=C(C=C1)N=C(C)C=C2N3CCN(CC3)C4=C(   | 0.294979 | 0.244884 |
| GSIQYCKOUGIZQC  | COC1=CC(NC2=C3C=CC=CC3=NC(=N2)C4=CC=CC(=    | 0.263504 | 0.258078 |
| UVNVEKUILAKEEW  | CCN(CC)CCNC(=O)C1=CC=C(NC(=O)C2=CC(OC3=CC   | 0.266935 | 0.26273  |
| KFEZGJFTVICLIJ  | CN(C)CC(CCC(CN(C)C)C(O)(C1=CC=CC=C1)C2=CC=C | 0.316038 | 0.299546 |
| UOMQOXZSEIQJNP  | OCl(=O)(=O)=O.CCOC1=CC=C(C=C1)C2=CC(C3=CC=  | 0.247025 | 0.246645 |
| AWHOUECFNVCQJN  | COC1=C(OC)C(OC)=C(CN(C)C2=NC=NC3=C2C=CS3)   | 0.296817 | 0.24913  |
| ZIBPFPDJVNOBOW  | COC1=CC=C(C=C1)C2=C(N=C(S2)N3CCN(C)CC3)C4=  | 0.288785 | 0.282861 |
| XQVFAYFYLYUCUM  | COC1=CC=C(CCNCC2=CC=C(OCC3=CC=CC=C3)C=C:    | 0.279679 | 0.251392 |
| AXZKBTZTOYIHSX  | CN(C)CCNS(=O)(=O)C1=CC=C(C=C1)N2CCC3=C2C=   | 0.283178 | 0.252628 |
| XDBUTLHMCHHUGS  | OCCCNCC1=CC=C(C=C1)N(C2=CC=CC=C2)C3=CC=C    | 0.262936 | 0.249505 |
| UJRNCRJRODDDSH  | COC1=CC=C(OCCN2CCN(CC2)C(=O)C3=CC(OC)=C(C   | 0.255843 | 0.242394 |
| CCQDRGSVHATBMH  | COC1=CC=C(C=C1)N2CCN(CC2)C3=NC=NC4=C3C(=    | 0.260606 | 0.228048 |
| ANHZFWMMEHONEN  | SC(=NCCN1CCOCC1)N2CCN(CC2)C3=CC=CC(Cl)=C3   | 0.245683 | 0.235059 |
| VGXUBWBZIFNJAK  | COC1=CC=C(C=C1)N2CCN(CC2)C3=NC=NC4=C3C(=    | 0.26222  | 0.225279 |
| JVCNICMRHFNHMP  | CC(C)C1=CC=C(C=C1)C2=CSC3=C2C(=NC=N3)N4CC   | 0.27493  | 0.246342 |
| WIQVPSDSSXAQHC  | CN(C)CCSC1=NC2=C(C=C(C)S2)C3=CC=C(F)C=C3)Cl | 0.276434 | 0.241403 |
| HYVZDOGMSWPIJR  | CN(C)CCCNS(=O)(=O)C1=CC=C(NC2CCCCC2)C=C1    | 0.272361 | 0.235184 |
| RXMRVUXDYLSHTD  | CN(CC1=CC(=O)OC2=C1C=CC(C)=C2)CC3=C(C)C=C   | 0.249331 | 0.238378 |
| NXVPKVZFHONGSO  | CCS(=O)(=O)C1=CC2=C(OC(NC3=C(Cl)C=CC=C3)=N2 | 0.250667 | 0.23679  |
| XORTWRWOUJPGVIK | CN(C)C1=CC=C(C=C1)\N=C\C2=CC=CN2C           | 0.253738 | 0.225513 |
| VJTTVMHLSVNJCE  | BrC1=C(C=CC=C1)C2=NN=C(COC3=C(C=CC=C3)C#N   | 0.243439 | 0.236647 |
| YZFDYAPPWGHIE   | CCC1=CC=C(CN(C)CC(O)COC2=C3C=CC=CC3=CC=C:   | 0.25561  | 0.229082 |
| BXUKOIPKEOHXAA  | CN(CC1=C(F)C=CC=C1)C2=C3C=CC=CC3=NC(=N2)C   | 0.248172 | 0.234137 |
| OLUMAWOALAGELM  | OC(COC1=C(Cl)C=C(F)C=C1)CN2CCC(CC3=CC=CC=C  | 0.244192 | 0.223077 |
| JHLQDOPYNDWWEY  | CCN(CC)S(=O)(=O)C1=CC(N)=C(C=C1)N2CCN(CC2)C | 0.269021 | 0.240211 |
| GRUMPROWLYTPSY  | CN(C)C1=CC=C(C=C1)\N=N\C2=C(Br)C=CC=C2      | 0.246904 | 0.24601  |
| GUMHGLZFULHKGGS | COC1=CC=C(OCC(O)CN(CC(O)COC2=CC=C(OC)C=C2   | 0.260188 | 0.23108  |
| XECGRNUQFTZTKC  | CC1=CC=C(C=C1)C2=CSC3=C2C(=NC=N3)N4CCN(C    | 0.264285 | 0.232479 |
| XQHROMJMEVGBIZ  | CCOC1=CC=CC2=C1N=C(S2)N(CCN(C)C)C(=O)\C=C\  | 0.264764 | 0.23229  |
| DSDAMEGZKXSORM  | CCOC1=CC=CC2=C1N=C(S2)N(CCN(C)C)C(=O)C3=C(  | 0.265375 | 0.230586 |
| ZMUKEKXXBRHBML  | COC1=C(C=C2C=CC=CC2=C1)C(=O)N(CCN(C)C)C3=N  | 0.263903 | 0.23394  |
| YJLYTSUDDPXUPO  | CCOC(=O)C1=C(OC2=C1C=C(OCC(O)CN(C)C)C=C2)C  | 0.258821 | 0.223847 |
| SIKHDKPKYMOGJ   | ClC1=CC2=C(NC(=N2)C3=CN=C(Cl)C=C3)C=C1      | 0.239834 | 0.225844 |
| NNULEIYGHDBJHH  | COC1=CC=C(C=C1)C2=CSC(=N2)N3CCSCC3          | 0.272476 | 0.269237 |

|                 |                                              |          |          |
|-----------------|----------------------------------------------|----------|----------|
| FLLGZHLDRRHIKJ  | COC1=C(N=C(N=C1)C2=NC=CC=C2)N(C)C3=CC=CC=    | 0.26659  | 0.257718 |
| ZLXVPWOJUYRELC  | CCCCNC(NCC1=CC(=CC=C1)C(F)(F)F)=NC2=CC=CC=   | 0.294055 | 0.253455 |
| HMDIJVAOPRALJU  | CSCC1=NC(=NC(=C1)N(C)C2=CC=CC=C2)C3=NC=CC    | 0.246916 | 0.23037  |
| RSYCVESFMFLJAO  | CC1=CC=C(CN2CCC(CC2)C3=CC(=NN3)C4=CC=C(Cl    | 0.333794 | 0.295448 |
| DUQIPPKZDHSFNV  | OCCN1CCN(CC1)C2=C3C=CC=CC3=NC(=N2)C4=C(C     | 0.267316 | 0.237186 |
| HJQQHUQIDZOELS  | COC1=CC=C(C=C1)C(C)NCCC(C2=CC=C(OC(C)C)C=C   | 0.2646   | 0.245885 |
| RINUGOJBPTXRGQ  | CC(C)CCCC(C)NCC1[C@H]2CC3C(=C)CCC[C@]3(C)(C  | 0.247997 | 0.222562 |
| PDYBCZFHAOLDH   | CN(C)C1=CC=C(C=C1)\C=N\N2C(S)=NN=C2C3CCCC    | 0.249306 | 0.222914 |
| SEMBABNNFURFAZ  | CC1=CC(C)=C(OCCCCN2CCC3=C(C2)C=CC=C3)C=C1    | 0.25782  | 0.251481 |
| NGPSAIVNGUIZQR  | CC(C)C1=C(OCCCCN2CCNCC2)C=C(C)C=C1           | 0.264875 | 0.239649 |
| CKNCIEDFYBKWED  | CCOC(=O)C1=C(N2CCN(CC)CC2)C3=C(N=C1)C(C)=C   | 0.246649 | 0.244552 |
| VFCNYGFBZKCIW   | COC1=CC=C(C=C1)C2=CSC3=C2C(=NC=N3)N4CCN(     | 0.258856 | 0.237024 |
| JFUUICKSJOTRHS  | CC1=CC(Cl)=CC(C)=C1OCCCCN2C=CN=C2            | 0.243233 | 0.224225 |
| PBFYXGZMUFFNNM  | COC1=C2N=C(C=C(C)C2=C(OC)C=C1)N3CCCCC3       | 0.250272 | 0.224585 |
| UJDWHTUENPHQKB  | CCCN1C(=N)N(CC(=O)C2=CC=C(Cl)C=C2)C3=C1C=C   | 0.238775 | 0.223044 |
| GZMRVEFNKBOYQH  | CC(C)OC1=CC=C(C=C1)C(CCNCC2=CC=C(O)C=C2)C    | 0.263918 | 0.233468 |
| JPEXNVDDTWRGBR  | COC1=CC=C(CN2CCN(CC2)C3=NC=NC4=C3C(=CS4)     | 0.29089  | 0.268207 |
| UISSSYMXXNFAVAB | COC1=CC=C(C=C1)C(CCNCC2=CC=C(C=C2)N(C)C)C    | 0.273225 | 0.241504 |
| QBEPQNSUAFPEK   | CC1=NC(=NC(NC2=CC(Cl)=CC=C2)=C1)C3=C(O)C=C   | 0.250378 | 0.232196 |
| MSYMTZURVQYITF  | COC1=C(C=CC=C1)C(CCNCC2=CC=CC=C2)C3=CC=C     | 0.275208 | 0.243135 |
| NIOBXJAUQMLYQK  | COC1=C(OC)C=C(CNCCC(C2=CC=C(OC(C)C)C=C2)C3   | 0.2811   | 0.267078 |
| GHCVIPZFNLGPE   | COC1=CC=C(CNCCC(C2=CC=C(OC(C)C)C=C2)C3=C(C   | 0.283517 | 0.26699  |
| ZWAQPQWYVAMZOD  | COC1=C(OC)C=C(CNCCC(C2=CC=CC=C2)C3=CC=C(C    | 0.276467 | 0.25612  |
| ZMBOEIGIAUJKY   | CC1=CC(CN2CCC3=C(C2)NC4=C3C=CC=C4)=CC=C1     | 0.267761 | 0.229524 |
| TYPGOIVFIGRRQL  | CN1C(=N)N(CC(=O)C2=CC=C(F)C=C2)C3=C1C=CC=C   | 0.26701  | 0.252406 |
| NWNMBTJQRYWWPQ  | OC(CN1C2=C(C=CC=C2)C3=C1C=CC(Br)=C3)CN4CC    | 0.278612 | 0.251331 |
| WCVBRQCZDPBUIL  | Cl.CC(C)CC1=C/C=C\C=C\1)C(C)C(=N)NCCC2=C/C=C | 0.28829  | 0.268562 |
| FLWNDNXNAFAHLN  | COC1=CC=CC(OC)=C1OCCN2CCN(CC2)C(C3=CC=CC     | 0.29075  | 0.285319 |
| OUIDHMRCLSZNME  | CC(C)(C1=CC=CC=C1)C2=CC=C(OCCN3CCCC3)C=C2    | 0.297164 | 0.267947 |
| RAEBDRHINKPDEM  | ClC1=CC(OCCCCN2CCNCC2)=C(Cl)C=C1             | 0.323579 | 0.281272 |
| AETVFPDBNPBKCG  | CC(C)(C)C1=C(OCCOCCN2CCCC2)C=CC(Cl)=C1       | 0.282953 | 0.263072 |
| QAHFCUQWQJAXMZ  | COC1=C(OC)C=C(C=C1)C2=NC(NN)=NC(=C2)C3=CC    | 0.292801 | 0.281221 |
| SOSROGHMSDAWKN  | [O-][N+](=O)C1=CN=C(C=C1)N2CCN(CC3=CC4=C(OC  | 0.252441 | 0.223915 |
| XRVVLMFVYFIAP   | CN1C(=NC2=C1C=CC=C2)N3CCN(CC3)C(C4=CC=CC     | 0.293959 | 0.274911 |
| SESXXNVJLXTYNC  | COC(=O)\C=C1/N=C(NC2=N/C(C)=C3/C=C(OC)\C=C,  | 0.251368 | 0.308166 |
| PBCZNIHRKHYSO   | CC1=NC(=CS1)C2=CC=C(C=C2)C(=O)NC3=CC(F)=CC   | 0.250712 | 0.243673 |
| ASTRBBDWJBPONC  | COC1=CC=C(OCC(=O)NC2=C(C=CC=C2)N3CCCCC3)     | 0.25887  | 0.241745 |
| XNPJVJWSJESDM   | COC1=CC=C(OCC(=O)NC2=CC(Cl)=C(C=C2)N3CCN(C   | 0.241193 | 0.224531 |
| BNWICQIQHOIRBP  | CCOC1=CC=C(C=C1)S(=O)(=O)N2CCCC(C2)C(=O)N3   | 0.243312 | 0.224846 |
| VUAJRKGGPPHDMSA | COC1=C(OC)C(CN(C)C(=O)C2=CC(=CC=C2)S(=O)(=O) | 0.259903 | 0.227571 |
| MDLXVKUVUOTCHM  | CC(NC(=O)C1=CC(=CC=C1)S(=O)(=O)N2CCN(CC3=C   | 0.248316 | 0.232157 |
| YRENCYSKNXJWAW  | CCN1CCN(CC1)C2=C(NC(=O)CC3=CC(Cl)=C(Cl)C=C3  | 0.257365 | 0.222666 |
| ULTXJTNKVGFMZJ  | CCOC1=C(C=CC=C1)N2CCN(CC2)C3=NC=NC4=C3C      | 0.282172 | 0.245601 |
| XAKSZJOYEUDHOK  | ClC1=C(COC2=C(C=CC=C2)C(=O)NC3CCN(CC4=CC=    | 0.258826 | 0.240336 |
| JUXUSGAZQWXVOV  | CN(C)C1=NC=NC2=C1C=C(S2)C3=CC=CC=C3          | 0.251736 | 0.228045 |
| ONEWYKJLXUUHJT  | COC1=C\C=C(/C=C/1)\C2=C\SC3=N\C=N\C(N4CCN    | 0.368732 | 0.313066 |
| CQVBKWSQOMDHSP  | COC1=CC=C(C=C1)C2=CSC3=C2C(=NC=N3)N4CCN(     | 0.256245 | 0.238341 |
| VRUKLCFOWMVSAO  | CN(C)C1=NC=C(C=C1)C2=C(ON=C2C3=CC=CO3)C4     | 0.283738 | 0.24376  |

|                 |                                                |          |          |
|-----------------|------------------------------------------------|----------|----------|
| GQIURKFIXVCNMB  | COC1=C(F)C=C(COC(=O)C2=C(C=CC(=C2)[N+])([O-])= | 0.260576 | 0.224659 |
| KWRWXYSVOUTWAY  | CC1CCN(CCC2=NC3=C(C=CC(NC(=O)COC4=CC=C(C       | 0.264599 | 0.239983 |
| WNSYZUCOWVUFAM  | CN1CCN(CC1)C2=CC=C(NC(=O)C3=CC4=C(C=CC=C4      | 0.263568 | 0.261459 |
| SJIYBYGJOSWZBE  | CCC1CCC2=C(C1)C=C(S2)C(=O)NC3CCN(CC4=CC=C      | 0.276769 | 0.23828  |
| KCEMYSVFROXCSP  | COC1=C(OC)C=C(NC(=O)COC2=CC=C(C=C2)N(C)S(=     | 0.257639 | 0.224826 |
| FNZIQFHZOIRQGG  | CCN1C=C(CN2CCC(CC2)C(=O)NC3=CC(=CC=C3)C4=      | 0.275932 | 0.256732 |
| OGTZWHHAPGLLFZ  | CC1=C(C(=O)N2CCN(CC2)C3=C(C)C(C)=CC=C3)C(=N    | 0.250795 | 0.223994 |
| PWMIWEPTWWAQOX  | BrC1=CC(NC(=O)C2=CC(OC(=S)N3CCOCC3)=CC=C2,     | 0.260474 | 0.235812 |
| QONRQALSXOAUARD | CN1CCN(CC1)C2=CC=C(NC(=O)C3=CC=C(O3)C4=CC      | 0.260375 | 0.245352 |
| ZHSXNWKLLXOUNW  | CN(C)CCCNC1=C(N=C(O1)C2=C(CI)C=CC=C2)S(=O)(=   | 0.277188 | 0.258175 |
| ICWQOMBLDBHQHC  | CN1CCN(CC1)C2=C(NC(=O)C3=CC=C(O3)[N+])([O-])=  | 0.26262  | 0.226193 |
| GOKLUMFHFBABDS  | FC1=C(C=CC=C1)C(=O)NC(S)=NC2=C(C=CC=C2)N3C     | 0.243563 | 0.227292 |
| GURGIAHFVKHWTL  | CN(C)C1=C(N=C(O1)C2=CC=C(C)C=C2)S(=O)(=O)C3=   | 0.244946 | 0.229236 |
| NWCRVUNKPIKMNQ  | CC1CN(CCCNC(=O)C2=CC=C(NC(=O)C3=CSCCO3)C=      | 0.253803 | 0.239079 |
| RJERXRUALHYQQU  | [O-][N+](=O)C1=CC2=C(NC=C2S(=O)(=O)N3CCN(CC3   | 0.285299 | 0.257496 |
| DARLBPMWSYXKLJ  | CC(C)(C)OC(=O)N1CCC(CC1)C2=C(C=NN2C3=CC(CI)    | 0.270086 | 0.250664 |
| KQWMLSKVICKNJX  | ClC1=CC2=C(OCCN2C(=O)CCC(=O)NCCCN3CCC(CC       | 0.246696 | 0.22344  |
| QRFXWUZQZNSJDZ  | CC1CN(C(=O)CCC(=O)NCCCN2CCC(CC3=CC=CC=C3       | 0.286757 | 0.249795 |
| OUCPPRBAYBUPGC  | [O-][N+](=O)C1=CC(N2C=CC=C2)=C(C=C1)N3CCN(C    | 0.239632 | 0.237103 |
| GYQNXYYQGNUDXME | CC1=CSC2=C1C(NC3CCN(CC4=CC=CC=C4)CC3)=NC       | 0.265606 | 0.24214  |
| CFHYAXQWEYGRM   | COC(=O)C1=C(N)C=C(S1)C2=CC=CS2                 | 0.245111 | 0.229451 |
| DAKBXCCNKUPXRY  | COC1=C(OCC2=CC(=NO2)C(=O)N3CCN(C)C(C3)C4=      | 0.244454 | 0.226592 |
| QYJVOLSFWOOVIO  | CCC(C)N(CCNC(=O)C1=CC2=C(SC3=C(C=CC=C3)C(=     | 0.271395 | 0.234149 |
| YPFSAMLWHLOEKP  | CCN1CCN(CC1)C2=C(N=C(S2)S(C)(=O)=O)S(=O)(=O)(  | 0.266639 | 0.245298 |
| RKEKVGQXQNBGLM  | COC1=C(C=CC=C1)N2CCN(CC2)C(CNS(=O)(=O)C3=C     | 0.267346 | 0.224918 |
| ROIWSBGTSPIVISQ | CC(C)N1C=C(CN2CCC(CC2)C(=O)NC3=CC=C(OC4=C      | 0.276842 | 0.237068 |
| WCOQTOBKVVBPZ   | CCOC1=C(CI)C=C(CN2CCC(CC2)C(=O)NC3=CC(=CC=     | 0.273281 | 0.239337 |
| YTBFIKLEWMMBR   | CCN1C=C(CN2CCC(CC2)C(=O)NC3=CC(=CC=C3)C4=      | 0.295756 | 0.273155 |
| JPHQP MJPTFSEGS | CN1C(CN2CCCC(C2)C(=O)NC3=CC=C(C=C3)C4=CC(I     | 0.286552 | 0.255164 |
| GFFPMKFJDMVYCW  | COC1=CC(=CC=C1)C2=CC=C(NC(=O)C3CCN(CCCN        | 0.268116 | 0.232567 |
| GMHPZRMQJRBMJ   | COC1=C(F)C=C(CN2CCC(CC2)C(=O)NC3=CN=C(OC4      | 0.252572 | 0.230882 |
| OQMACQSNNKBGBJ  | CC1=CC(OCC2=CC(=NO2)C(=O)NCCN3CCCCC3CO)=       | 0.255723 | 0.233516 |
| AXBLXKUXVCHEBL  | CC(C)C1=C(C=C(C=C1)C2=CC(C)=NO2)S(=O)(=O)N3C   | 0.261413 | 0.234503 |
| APXUNOXFZGEJOZ  | CCC1=C(C=C(C=C1)C2=CC(C)=NO2)S(=O)(=O)N3CC     | 0.241433 | 0.225005 |
| WQVDJDGTAMSLE   | CC1=C(C)C2=C(C=CC(=C2)C(=O)NCCCN3CCOCC3)N      | 0.25843  | 0.237658 |
| MVJDCERCEUYUJL  | COC1=C(C=C(C)C=C1)S(=O)(=O)NC2=CC(=CC=C2)C3    | 0.258292 | 0.226991 |
| DBUXPKRXRIUEDD  | CC1=C(C)C(=CC=C1)N2CCN(CC2)C(=O)CCC(=O)N3C     | 0.249329 | 0.225458 |
| MNTSZSWLQUKGCT  | COC1=CC(CCN2CCC(CNS(=O)(=O)C3=C(C)C=CC(=C3     | 0.285195 | 0.241452 |
| UZDHAKOABAIRTB  | COC1=C(C=C(C=C1)C2=CC(C)=NO2)S(=O)(=O)N3CC     | 0.241982 | 0.222972 |
| FXEYUBCEWXHJAV  | CC1=NOC(=C1)C2=CC(=C(C)C=C2)S(=O)(=O)NCC3C     | 0.280945 | 0.242747 |
| RBYQLIMJHILDLF  | CC1=NOC(=C1)C2=CC(=C(C)C=C2)S(=O)(=O)NCC3C     | 0.3029   | 0.268549 |
| HQCBHCQGBWTZLG  | CN1C(C)=C(C)C2=C1C=CC(=C2)C(=O)NCCCN3CCN(C     | 0.250963 | 0.232185 |
| MNLJQFJILWSOQS  | CN1C(C)=C(C)C2=C1C=CC(=C2)C(=O)NCCCN3CCN(C     | 0.25561  | 0.235455 |
| PZHQTEVQGUAXTM  | CCN1N=CC(CN2CCCC(C2)C(=O)NC3=CC(=CC=C3)C4      | 0.256679 | 0.238404 |
| XQXZJYVDFJINN   | CCOC1=C(CN2CCCC(C2)C(=O)NC3=CC(=CC=C3)N4C      | 0.29219  | 0.259501 |
| WQVWVOQQWVSDKX  | CC(C)N1C=C(CN2CCC(CC2)C(=O)NC3=CC(=CC=C3)C     | 0.271597 | 0.240104 |
| WRBVNQAJRKFPO   | CC1=CC(=NO1)C(=O)NC2CCCC3=C2C=NN3C4=C(C)       | 0.260763 | 0.223377 |
| SNLRHQHRYPTMF   | ClC1=CC(=CC=C1)C2=CC(NC(=O)C3CCN(CC4=NC=C      | 0.266686 | 0.26847  |

|                 |                                                 |          |          |
|-----------------|-------------------------------------------------|----------|----------|
| VZHPQIXNLKUDII  | COC1=CC(=CC=C1)C2=CC=C(NC(=O)C3CCCN(CC4=C       | 0.268242 | 0.235303 |
| VTGKECSOVZGDFJ  | FC1=CC(=CC=C1)C2=CC=C(NC(=O)C3CCCN(CC4=NC       | 0.253536 | 0.231503 |
| BCYNSARSDGREIL  | CCN1C=C(CN2CCCC(C2)C(=O)NC3=CC(=CC=C3)C4=       | 0.276897 | 0.256473 |
| RTFURTSIKJGZHS  | CCN1C=C(CN2CCCC(C2)C(=O)NC3=CC(=CC=C3)C4=       | 0.276515 | 0.245546 |
| QOBPFWGFVDFD    | CN(C1CCN(C)CC1)S(=O)(=O)C2=CC=C(NC(=O)COC3=     | 0.265281 | 0.228808 |
| PKMGMNUTKUDDHG  | CN1CCN(CC1)C2=CC(C)=C(NC(=O)C3=CC=C(O3)C4=      | 0.251086 | 0.222579 |
| NHCILWCCBOHEKL  | COC1=CC=C(NS(=O)(=O)C2=CC(=CC=C2)C(=O)NC3C      | 0.266214 | 0.236759 |
| DEMRCDDXWGUKEH  | CN(C)C(CNC(=O)CCC1=NC2=C(C=CC(CI)=C2)N(CC3=     | 0.258137 | 0.227737 |
| XUBMWKYFGUSFCT  | CCOC(=O)C1=C(C)NC(C(=O)OCC(=O)C2=CC=CC=C2):     | 0.277382 | 0.250195 |
| VOYVDQIPUWRVSF  | COC1=C(C=CC=C1)C(CNC(=O)C2=CC=C(O2)C3=C(CI      | 0.298533 | 0.267317 |
| UIIYWPIRVFKBBM  | CC(OC1=CC=C(Br)C=C1)C(=O)NC2=C(C=CC(CI)=C2)N    | 0.325593 | 0.288986 |
| UKTSXBGQGMWYDJ  | COC1=C/C(NC2=N/C3=C/C=C\C=C/3\N=C\2NS(=O)I      | 0.295167 | 0.282005 |
| PVOMHWQKAKFWDU  | CCCC1=NC=C(CN2CCCC(C2)C(=O)NC3=CC=C(C=C3)       | 0.265879 | 0.232662 |
| FACJLGXUVVXWOR  | CC(OC1=CC=C(Br)C=C1)C(=O)NC2=CC=C(C=C2)S(=C     | 0.271397 | 0.234845 |
| FLHNXQCEOOJUGR  | COC1=CC=C(OC)C2=C1SC(=N2)N(CCN(C)C)C(=O)\C:     | 0.256595 | 0.23666  |
| NWCMEBYXDVYBII  | CCN(CC)CCN(C(=O)C1=C(OC)C=C2C=CC=CC=C1)C:       | 0.26087  | 0.232354 |
| VVZZSLWVHYPDP   | COC1=C(C=C2C=CC=CC2=C1)C(=O)N(CCN(C)C)C3=N      | 0.25017  | 0.227626 |
| HGQLWRCILKLOMM  | ClC1=CC=CC(CI)=C1CN2C=CC(=N)C=C2                | 0.2797   | 0.238828 |
| AWNLVKPHFGNVQD  | CCCN1C2=C(CCC2)C(=N)C3=C1CCC3                   | 0.264624 | 0.241656 |
| MPVBHEQNIQZVJXP | CCCCCCCCCN1C=CC(=N)C=C1                         | 0.252573 | 0.238657 |
| OKCJSJRJQAGPQL  | CCCCCCCCCN1C=CC(=N)C=C1                         | 0.269885 | 0.256066 |
| YKTGLPHPYRTGRT  | CN1CCN(CC1)\N=C\C2=CC=C(OCC3=CC=CC=C3)C=I       | 0.255406 | 0.242863 |
| UOFDUGZZJBYOJI  | COC1=C(C=CC=C1)C(=O)ON=C(N)C2=NC=CC=C2          | 0.260643 | 0.264105 |
| POANTKOHXPOYEB  | CCN(CC)CCN1C(=N)N(CC(=O)C2=CC=C(Br)S2)C3=C1     | 0.26626  | 0.222658 |
| REJSIUIKZYMFQW  | [O-][N+](=O)C1=CC=C(C=C1)C2=NC3=C(C=CC=C3)C(    | 0.270165 | 0.24438  |
| USHNXZAJLJZIKS  | COC1=C(OC)C=C(C=C1)C(N)=NOC(=O)C2=C(C)ON=C      | 0.283756 | 0.282629 |
| HUCFCNNWKPUVBP  | ClC1=C(OCC(=O)NC2=CC=C(C=C2)N3CCN(CC3)C(=C      | 0.241326 | 0.227834 |
| VYNPOQSODVQHKP  | COC1=C(C=CC=C1)C(=O)NC2=C(C=CC=C2)N3CCN(C       | 0.250976 | 0.226619 |
| FJVJXNJFZGWPCD  | CN1CCN(CC1)C2=C(NC(=O)C3=CC=C(O3)C4=C(C=C       | 0.248365 | 0.222326 |
| IDBAMXHGGSWDOD  | CN1CCN(CC1)C2=C(NC(=O)\C=C\C3=CC(F)=CC=C3)I     | 0.247653 | 0.243796 |
| BAHWXLHTUVXXKN  | CN(CC1=CC=CC=C1)C2=CC(CC(C)C)C2)=[N+]3CCCC      | 0.257886 | 0.230681 |
| QUMDSKWDUIUZNB  | CCN1CCN(CC1)C2=C(NC(=O)COC3=C(CI)C=C(F)C=C:     | 0.259902 | 0.225475 |
| QZDNACUTXRZZHL  | CCC1=CC=C(C=C1)C2=NC(CS(=O)CC(=O)NCCN3CCC       | 0.241077 | 0.233448 |
| XZGTYZZQPLODGY  | CC1=C(CS(=O)CC(=O)NCCCN2CCN(CC3=CC=CC=C3)       | 0.252239 | 0.234081 |
| DMUBBYXIJZVCFD  | CC1=C(CSCC(=O)NC2CCN(CC3=CC=CC=C3)CC2)N=C       | 0.261086 | 0.238502 |
| XHMJOWSQIAUPAK  | CC1=NC(NCC2=CC=CC=C2)=NC(N\N=C\C3=CC(F)=C       | 0.238658 | 0.226886 |
| OFVWSWOGBFORDU  | CC1=NC(NCC2=CC=CC=C2)=NC(N\N=C\C3=CC=C(F)       | 0.255495 | 0.254231 |
| YIOUNHISXQMMEG  | CC1=CC(C)=NN1C2=NC(N\N=C\C3=CC(CI)=CC=C3)=      | 0.263625 | 0.252844 |
| HZCUSYUUMGSVCS  | CC1=CC(C)=NN1C2=NC(N\N=C\C3=CC=C(Br)C=C3):      | 0.273162 | 0.249876 |
| IONZMLSFEITLRK  | CCCCOC1=C(CI)C=C(CSC(N)=N)C=C1                  | 0.268619 | 0.246176 |
| NPCBUTBQJRWYEU  | CCN(CC)C(=O)C1=NN(C2=C1C3CCC2(C)C3(C)C)C4=      | 0.240676 | 0.234756 |
| IAEAEBWWPMMKPU  | CC1(C)C2C\C(=N/O)C(C)(CC12)[N+][([O-])=CC3=CC(= | 0.259442 | 0.244116 |
| SHTBCPUEULZIOI  | OCl(=O)(=O)=O.C[N+]1=C(C=C(C=C1)C2=CC=CC=C2)(   | 0.250067 | 0.2545   |
| IEOBQTYHOHTUKL  | COC1=CC2=C(C=C1)C(C)=CC(=N2)N3CCCCC3            | 0.249602 | 0.243357 |
| KCELIRRYXRQITP  | COC1=CC=C(C=C1)[N+]2=C3CCCCN3C(=C2)C4=CC        | 0.317155 | 0.311301 |
| NIBYEUDXSSPXDT  | COC1=CC=C(C=C1)[N+]2=C3CCCCN3C=C2C4=CC=C(I      | 0.296639 | 0.257865 |
| SMHKYGNXTZSHHS  | COC1=CC=C(C=C1)[N+]2=C3CCCCN3C=C2C4=CC=         | 0.258736 | 0.237287 |
| KGGXBIFSHPETL   | OCl(=O)(=O)=O.COC1=CC=C(C=C1)C2=CC(C3=CC=C      | 0.245538 | 0.256793 |

|                 |                                              |          |          |
|-----------------|----------------------------------------------|----------|----------|
| BQQZIJQIMNHCD0  | CCC1=CC=C(C=C1)[N+]2=C3SCCCN3C(=C2)C4=CC=    | 0.247501 | 0.233716 |
| LYNNCZMXICEEU   | CN1CCN(CC1)NC(=O)C2=CN(N=C2C3=CC(Br)=CC=C    | 0.258817 | 0.229052 |
| DVXAOTCGCJNNQD  | COC1=CC=C(CCNC(S)=NC2CCN(CC3=CC=CC=C3)CC     | 0.278463 | 0.282083 |
| ORONCDNHWTZLKC  | CCN1CCCC(C1)OC(=O)C2=C3C=CC=CC3=NC(=C2)C4    | 0.244175 | 0.240997 |
| CSEAICBGUWNOFL  | CCOC(=O)C1=C(NC(=O)CN2CCN(C)CC2)SC(C(=O)NC   | 0.25759  | 0.251896 |
| IWKLXNHIGJNDLO  | COC1=CC=C(C=C1)C2CC(C)(NC3=C(N2)C=CC=C3)C4   | 0.266343 | 0.255723 |
| HBZLTUAXQJAGCL  | NC(=NOC(=O)C1=C2C=CC=CC2=CC=C1)C3=NC=CC=     | 0.251277 | 0.257188 |
| BQGZWZUJISIWKHU | CC1(C)CC(=CC(C1)=[N+]2CCCC2)N3CCCC3          | 0.260823 | 0.251162 |
| SZWJOMFGHPFQSN  | CC1(C)CC(=CC(C1)=[N+]2CCCC2)N3CCCC3          | 0.267365 | 0.245986 |
| LNUAAHAFAERZTED | CC1CC2(C)OC3=C(CC2C(C)C1CNCCN(C)C)C=CC=C     | 0.27376  | 0.28643  |
| WYYJSVREMNIWIRS | COC1=C(C=CC=C1)N2C(=C[N+]3=C2CCC4=C3C=CC=    | 0.256884 | 0.235959 |
| RZKJWHNLYVYZMI  | [O-][N+](=O)C1=CC(CN2CCN(CC2)C3=NC=CC=N3)=C  | 0.239685 | 0.223352 |
| AAMIRUAPNCAFAU  | COC1=CC(OC)=C(Br)C=C1CN2CCC(CC3=CC=CC=C3)    | 0.27038  | 0.255461 |
| FPYHIYCBCNOEIP  | CCOC(=O)C2(CCOC1=CC=CC=C1)CCN(CC3=CC(OC)=    | 0.306374 | 0.283046 |
| LYGAAHYMZHBKOM  | CC(NCCCCOC1=C(C)C=C(C)C=C1)C2=CC=CC=C2       | 0.308465 | 0.275022 |
| KFGUBVRIRRHLYD  | C(CNCCC1=CC=CC=C1)COC2=C3C=CC=CC3=CC=C2      | 0.291241 | 0.283656 |
| YXGRRKZZDIPOLM  | CSC1=CC=C(\C=N\N2CCN(CC3=CC=C(CI)C=C3)CC2)   | 0.245691 | 0.240867 |
| KQOGHJUNYNFRNT  | CC1(C)CC(=CC(C1)=[N+]2CCCC2)N3CCCC3          | 0.271367 | 0.246667 |
| FBLYJVKTJDEHJQ  | COC1=CC=C(C=C1)C2CC(=NN2C(=O)CN3CCN(CC4=     | 0.264527 | 0.267831 |
| XNBNJFWYXXSJGT  | COC1=C(OCCCCN2CCC(C)CC2)C=CC(\C=C\C)=C1      | 0.27998  | 0.261477 |
| GTXVYQKWOMIUNX  | COC1=C(\C=N\N=C(S)NCCN2CCOCC2)C3=C(C=CC=     | 0.247877 | 0.240788 |
| VDGSGEDIQNWBAS  | CC1CCCCN1CC(O)COCCC2CC4CC(CC(C4)C2)C3        | 0.283765 | 0.250472 |
| VCERLNGTLWEWPR  | COC1=C(OC)C=C2CN(CCC2=C1)C3=NC(CN4CCCC4)     | 0.245055 | 0.242692 |
| JEPORSKVSUFAPU  | CC1CCN(CCCOC2=C(Br)C=C(CI)C=C2)CC1           | 0.260382 | 0.266579 |
| PDSHQZBTONOLJP  | CC1CCN(CCCOC2=C(CI)C=C(Br)C=C2)CC1           | 0.264173 | 0.258083 |
| PWZLITFPKRHCIF  | CN1CCN(CC1)\N=C\C2=CC=C(C=C2)N(C3=CC=CC=C    | 0.276293 | 0.291095 |
| MRNDYULFWGWPRO  | C(N1CCC(CC1)NC2=NN=C(CS2)C3=CC4=C(OCCO4)(    | 0.25421  | 0.230616 |
| LFQHTMSWDYZADE  | CCN(\C(S)=N\C1=CC=CC=C1)C2=C3C=CC=CC3=CC     | 0.249802 | 0.244326 |
| RMPUCWLQCSXYGC  | CN(CC1=CC=CC=C1)C(=O)CN2CCN(CC2)C(C3=CC=C    | 0.260797 | 0.24958  |
| RGFWHRXRCDUWIP  | COC1=C(NC(=O)C2=C(CI)N=NC(CI)=C2)C=CC=C1     | 0.240209 | 0.24503  |
| KZIWZOOEBFXZHH  | CC1=C2C=CC=CC2=[N+](C=C1)C3=CC=CC=C3         | 0.239188 | 0.249605 |
| ZYTZKHQYGJASAI  | CC1=[N+](C)C(=CC(=C1)C2=CC=CC=C2)C3=CC=CC=C  | 0.290735 | 0.278364 |
| NUIMACVJXPXSLA  | CC1=CC=C(NP(=O)(NC2=CC=C(C)C=C2)NC3=CC=C(C   | 0.266626 | 0.255672 |
| HQUYMWZHIKIES   | CCOC1=CC=C(C=C1)N2C(=C[N+]3=C2SCC3)C4=CC=    | 0.245511 | 0.227234 |
| ZMYLPJFGIDIKKI  | COC1=C(C=CC=C1)C(\C)=N\N=C(S)NCC2=CC=CC=C    | 0.248499 | 0.235126 |
| HTTXEKZUKHDEX   | C\C(=N/N=C(N)N)C1=C(CI)C=C(CI)C=C1           | 0.303911 | 0.308711 |
| VRNFMFWOARQBIL  | CCN(CC)CCOCCOC1=C2C=CC=CC2=C(CI)C=C1         | 0.319134 | 0.306436 |
| DSRUNNBBZOHHPD  | CC1CCN(CCCOC2=C(Br)C=C(C)C=C2)CC1            | 0.293018 | 0.298585 |
| AICNPCABIMNBQK  | CN(C)CC(O)COC(C1=CC=C(CI)C=C1)C2=CC=C(CI)C=C | 0.32596  | 0.291798 |
| WYHUOAPUTIPIK   | N\C(S)=N/N=C/C1=CN(CCC#N)N=C1C2=CC=C(Br)C=   | 0.243448 | 0.236165 |
| YNOOKMFOMDSECL  | CC1=C(\N=N\C2=CC=C(Br)C=C2)C(C)=NN1          | 0.258102 | 0.257247 |
| VVNQQPUZUFMHKJ  | CN(C)CCCN(CC1=CC=CC=C1)C(\S)=N\C2=CC(CI)=C(f | 0.336826 | 0.31797  |
| GUXRNCAQTWASOC  | CC(C)C1=CC=C(C=C1)N2C(=C[N+]3=C2CCC4=C3C=C   | 0.242177 | 0.233145 |
| MCNLXNKNZVFOEA  | OC(CNCCC(C1=CC=CC=C1)C2=CC=CC=C2)COC3=CC     | 0.274304 | 0.280019 |
| ZEFBGBNUVPLUCI  | CCCN1CCC(CC1)=NNC2=C(C=C(C=C2)S(=O)(=O)N(CI  | 0.242158 | 0.222456 |
| FMBVMBZAESFWFX  | CC1=C(C=CC(OCCN2CCC(CC3=CC=CC=C3)CC2)=C1     | 0.24449  | 0.243843 |
| MCLUGZKXPXGFEFR | CCC(=O)C1=C(OCCCN2CCC(CC3=CC=CC=C3)CC2)C=    | 0.284016 | 0.254773 |
| AGIJYYOJJDOYET  | N#CC1=C(OCCCN2CCC(CC3=CC=CC=C3)CC2)C=CC=     | 0.259126 | 0.228648 |

|                 |                                              |          |          |
|-----------------|----------------------------------------------|----------|----------|
| KAZDJDMKBIJSQB  | [O-][N+](=O)C1=CC=C(OC2=CC=C(C=C2)C(=O)N3CC( | 0.252257 | 0.243925 |
| JKXQZIHAEQBKON  | COC1=CC=CC(OC)=C1OCCCN2CCC(CC3=CC=CC=C3      | 0.295212 | 0.273198 |
| IKQRUNJCNLAWLM  | COC1=CC(OC)=C(C=C1)S(=O)(=O)N2CCN(CCC3=CC=   | 0.271468 | 0.270142 |
| CAIOAFRWOLEVOM  | C\C(=N/NC1=NC(=CC(C)=N1)C2=CC=CC=C2)C3=CC=   | 0.297539 | 0.256866 |
| JDFXORKCCZHUNF  | CCOC1=C(O)C(CN2CCCC(C2)N3CCN(CC3)C4=CC(Cl    | 0.257504 | 0.238642 |
| HGNOQQFCBMFMNQ  | COC1=C(CN2CCC(CC2)C(=O)NC3=CC=C(C=C3)C4=C    | 0.255187 | 0.23514  |
| AVLVKMUKWOULKR  | COC1=CC(OC)=C(C=C1)C(=O)NC2=CC3=C(C=CC=C3    | 0.243967 | 0.233761 |
| GNODRDHUYWDQJH  | OCC2(CC1=CC=C(F)C=C1)CCCN(CC3=C(Cl)C=C(F)C=  | 0.251702 | 0.230161 |
| COXBRPPASOVKAC  | COC1=C(C)C=CC(=C1)C(=O)N(C)CC2CCN(CCC3=CC(   | 0.260092 | 0.226456 |
| HRTJDFZRPAYGEZ  | NNC1=NC(=CC(=N1)C2=CC=CC=C2)C3=CC=C(Br)C=    | 0.261278 | 0.226674 |
| SRWOANFVXCQHMS  | CC1=CC=C(SCCSC2=NC=CC=N2)C=C1                | 0.241198 | 0.226183 |
| MIEQTGGXHMZWBB  | OC(COC1=CC=CC=C1)CN2CCN(CC2)C(C3=CC=CC=C     | 0.258394 | 0.236287 |
| AHLCHIOKZHMFPB  | CCN1CCN(CCOC2=CC=C(C=C2)C(C)(C)C3=CC=CC=C    | 0.270916 | 0.244708 |
| CWCNWWYUPYPWGJA | O[C@@H]1CN(CC2=CC=C(C=C2)N3C=CC=N3)CC[C      | 0.265197 | 0.231768 |
| FHTNWUJIGFCNA   | COC1=C(C)C(C)=C(CN2CCN(CC3=NC4=C(C=C3)C=C(   | 0.258173 | 0.235067 |
| AZCDBPOTZGGHKF  | CCN1CCN(CC#CCOC2=C(OC)C=CC=C2)CC1            | 0.241265 | 0.228396 |
| ARUKTMULLAAOLS  | ClC1=CC(C=O)=C(OCCN2CCC(CC3=CC=CC=C3)CC2)    | 0.244576 | 0.226595 |
| DGUPKONDRZCVTL  | COC1=CC(OC)=C(Br)C=C1CN2CCC3=C(C2)NC4=C3(    | 0.265486 | 0.250586 |
| QHMQAJKQNLVLL   | CC(C)CC1N(CC2=NC(C)=CC=C2)CCC3=C1NC4=C3C=    | 0.262052 | 0.265522 |
| VAFJZYVAGXXYFP  | CCOC(=O)C2(CCC1=CC=CC=C1)CCN(CC3=C(OC)C=C    | 0.276201 | 0.250896 |
| FNDDWFQDOPSAJL  | CCOC(=O)C2(CCOC1=CC=CC=C1)CCN(CC3=CC(COC     | 0.265353 | 0.231998 |
| GIZKJVMWCIFXCM  | COCCN(CC1=C(C)OC(=N1)C2=CC=C(C=C2)C3=CC=C    | 0.254549 | 0.230487 |
| DBMWZIWBWJMKMHC | COC1=CC(OC)=C(CN2CCCC(C2)C(=O)C3=CC=C(Cl)C   | 0.271969 | 0.253142 |
| KJBVBKOUWYLTN   | COC1=CC(OC)=C(C=C1)C(=O)NC2CCCN(CC3=CC=C(I   | 0.264513 | 0.2466   |
| SKSCJXHJCNFGIP  | COC1=CC(OC)=C(C=C1)C(=O)C2CCCN(CC3=C(O)C=C   | 0.274696 | 0.24233  |
| FLGUEQLEOWFNPG  | CC1=NN(C(C)=C1Cl)C2=CC=C(NC(=O)C3=CC=NC=C3   | 0.247597 | 0.230821 |
| NBRUKEFADYTPPM  | CN1CCN(CCCOC2=CC=C(C=C2)C3=CC=CC=C3)CC1      | 0.272872 | 0.264731 |
| JEXKWZVWRFGTKD  | COC1=CC(CN(C)CC2CCCN(CCC3=CC=C(F)C=C3)C2)=   | 0.376319 | 0.335049 |
| JGNZDNGRHHYTMK  | CCOC(=O)C2(CCOC1=CC=CC=C1)CCN(CC3=C(OC)C(    | 0.285881 | 0.284463 |
| GLWDHFPSJNICSX  | CCOC(=O)C2(CCOC1=CC=CC=C1)CCN(CC3=CC(OCC     | 0.284803 | 0.238619 |
| OXNNXZXOFWUOLX  | CCOC(=O)C2(CCOC1=CC=CC=C1)CCN(CC3=C(O)C(O    | 0.282446 | 0.258756 |
| WCIOXRVBDMJIRY  | CC1CN(CCCOC2=C3C=CC=CC3=C(Cl)C=C2)CC(C)O     | 0.272017 | 0.257558 |
| VKZUXKFTDPLPAS  | CCC(C)C1=C(OCCCN(C)CC2=CC=CC=C2)C=CC=C1      | 0.254549 | 0.246462 |
| WZBJENIOBSYDSR  | CC1=CC(Cl)=CC(C)=C1OCCOCCNCC2=CC=CC=C2       | 0.24524  | 0.226695 |
| PYSQGUGELWTMPU  | CC(CCC1=CC=C(O)C=C1)NCCC(C2=CC=CC=C2)C3=C    | 0.342739 | 0.296925 |
| GJRPTEZZYDDVJF  | COC1=CC=C(CCC(C)NCCC2=C(Cl)C=C(Cl)C=C2)C=C1  | 0.283635 | 0.244573 |
| JPXZWXZAHSVNB   | CCCN1CCC(CC1)NC2=CC(OC)=CC(OC)=C2            | 0.270852 | 0.259889 |
| QLPAJZWONBXDTG  | CC(CCC1=CC=C(O)C=C1)NC(C2=CC=CC=C2)C3=CC=    | 0.265569 | 0.249118 |
| JBDNRLFNOXESPO  | COC1=CC=C(CC(C)NCCC(C2=CC=CC=C2)C3=CC=CC=    | 0.286529 | 0.247276 |
| AOLFEVCPUHDWDH  | NC(N\N=C\C1=CC=C(F)C=C1)=N\N=C\C2=CC=C(F)C   | 0.241145 | 0.226062 |
| GBBGYHUYLONBJ   | CC(C)C1=C(OCC(O)CN2CCC3=C(C2)C=CC=C3)C=C(C   | 0.302154 | 0.269815 |
| FEHSPDGIMNPGSF  | CC(C)C1=C(C)C=C(OCC(O)CNC(C)C2=CC=CC=C2)C=C  | 0.251009 | 0.229326 |
| YHNQYEQBWINYML  | CC1=CC(Br)=C(OCCCN2CCCC2)C(Cl)=C1            | 0.268236 | 0.258003 |
| MAXODDXKVCZCAU  | COC1=C(OC)C(OC)=C(CN2CCN(CC3C=CC=C(C)C=C     | 0.250698 | 0.245954 |
| UOMUQAJKVVYJKR  | CC1=CC(Br)=C(OCCCN2CCCC2)C(C)=C1             | 0.261186 | 0.238766 |
| KYLDCBUDNVECC   | COC1=CC=C(C=C1)C2=NC(CN3CCN(CC4=CC(Cl)=CC    | 0.250468 | 0.231972 |
| CHVWMSPMCIYOG   | CC(C)N(CCO)CC1=C(C)OC(=N1)C2=CC=C(C=C2)C3=(  | 0.28657  | 0.290963 |
| PCIPRUBBZSOJFK  | COCCNC(=O)C1=CC(OC2CCN(CC3=CC=C(C=C3)C(C)    | 0.249815 | 0.230928 |

|                |                                               |          |          |
|----------------|-----------------------------------------------|----------|----------|
| QKBQBZRKMWCREJ | FC1=CC=C(C=C1)N2CCN(CC2)C(=O)C3CCC(CNS(=O)    | 0.251826 | 0.232606 |
| WMLYDIBRHRFUSH | CC1CCCN(CCCNC(=O)C2=CC3=C(S2)C4=C(OC3)C=C     | 0.253594 | 0.23085  |
| CKKMJZYUHLRHM  | CCOC(=O)N1CCN(CC1)C(=O)C2=CC3=C(SCCN3CC4=     | 0.253708 | 0.222643 |
| JGZSGXTUCLJOMX | CN1CCN(CCCNC(=O)C2=CC3=C(SCCN3CC4=CC=C(F      | 0.241274 | 0.222733 |
| QFGJRYXCULDYHZ | CN1CCN(CCCNC(=O)C2=CC3=C(SCCN3CC4=CC=C(C      | 0.254326 | 0.227512 |
| BABGDNDVMSPQPZ | CCN1CCN(CCCNC(=O)C2=CC3=C(C=C2)C(Cl)=C4CC     | 0.286767 | 0.261154 |
| SKRXFKGFKFOOKW | CCC1CCCCN1CCCNC(=O)C2=CC3=C(C=C2)S(=O)C4=     | 0.244499 | 0.225204 |
| SQKDINORIMCUSU | CC1CCCN(CCCNC(=O)C2=CC3=C(C=C2)S(=O)C4=C(C    | 0.268601 | 0.25378  |
| HVFPVNVZGVJZOV | CC1CC(C)CN(CCCNC(=O)CS(=O)CC2=C(C)OC(=N2)C:   | 0.280688 | 0.238846 |
| QOMBVOFZPURYGG | CCOC(=O)N1CCC(CC1)NC(=O)C2CCCN(CC3=C(C)OC     | 0.247185 | 0.24     |
| NBVQTGYWYLPEDO | CCOC(=O)N1CCC(CC1)NC(=O)C2CCCN(CC3=C(C)OC     | 0.26507  | 0.251153 |
| WNQCXXKOTZBYGA | CC1=C(C)C(=CC=C1)N2CCN(CC2)C(=O)C3=CC(=CC=    | 0.285979 | 0.249725 |
| LFOBRSPYTQPWCV | FC(F)(F)C1=CC(=CC(CCN2CCNC[C@H]2)CC3=C4C=C    | 0.259324 | 0.227879 |
| WJJYRAQTLJJCNF | OC1=CC=C(C[C@H]2)CNCCN2CCC3=C4C=CC=C4=        | 0.274042 | 0.231893 |
| FKUGFZNBSPHYHT | OC1=CC=C(C[C@H]2)CNCCN2CCC34CC5CC(CC(C5)      | 0.290954 | 0.243456 |
| DIFKFIKRWZMOHH | ClC1=NC2=C(C=CC=C2)C3=C1C=C(S3)C(=O)NCCCN     | 0.239535 | 0.232218 |
| PALAORSVCXZEFA | COC1=C(CN2CCCC(C2)C(=O)C3=C(SC)C=CC=C3)C(O    | 0.256329 | 0.250995 |
| ZRTSDOXTEQTCCP | CCOC(=O)C2(CC1=CC(OC)=CC=C1)CCN(CC3=C(O)C(    | 0.252741 | 0.225065 |
| RQGVRIYROYVBIW | COC1=CC=C(NC(=O)C2=C(C)N(CC3=CC=CS3)C(C)=C:   | 0.244366 | 0.223618 |
| VBNTYDSJLTWWID | FC(F)(F)C1=CC(Cl)=C(N=C1)N2CCN(CC2)C(\S)=N\CC | 0.250198 | 0.228862 |
| QCWZYJPDPROWAC | ClC1=CC(NC(=O)OC2CN3CCC2CC3)=CC=C1            | 0.238762 | 0.235773 |
| YHONNHGZTNLOQR | CC1=C(CNC(=O)NC2=CC(Cl)=CC=C2)C(=NO1)C3=CC    | 0.294081 | 0.264296 |
| WFLVKCLJXXUYGU | COC1=CC=C(CN2CSC(=S)N(CC3=CC=C(OC)C=C3)C2,    | 0.252967 | 0.2297   |
| OWWCVXXHBITLBA | S=C1SCN(CC2CC2)CN1CC3CC3                      | 0.25923  | 0.238014 |
| NRQUAVYOAZGFFD | ClC1=CC=CC(Cl)=C1\C=N\NC2=C(Cl)C=NC=C2Cl      | 0.253793 | 0.263286 |
| NFOGCEURFJXCRE | CC1=NC(=NC(OC2=CC=C(Cl)C=C2)=C1)C3=NC=CC(=    | 0.291144 | 0.257891 |
| NWPLPOACXICHEB | ClC1=CC2=C(C=C1)C(=CC=N2)N3CCN(CC3)C(=O)C4    | 0.244981 | 0.232624 |
| VCRGBXUBYNLNRI | CN1C(CSC2=C(C)NC3=C2C=CC=C3)=NN=C1SCC4=C      | 0.252302 | 0.256089 |
| RYVDNKBIXSRLKF | CCOC(=O)N1CCN(CC(=O)NC2=C(C=C(CC)S2)C(=O)C:   | 0.250075 | 0.229737 |
| BBQJERVLZYDMBV | C(N1CCSCC1)C2=CSC(=N2)C3=CC=CS3               | 0.27046  | 0.249558 |
| UZZHGEWFVOTYDT | CC1=CC(C)=NC(\N=C(/N)NC2=CC=C(OC3=CC=CC=      | 0.27249  | 0.243643 |
| ARMSHPQLBWTDEC | CCCCCCCCN1C2=C(CCC2)C(=N)C3=C1C=CC=C3         | 0.265322 | 0.22784  |
| MRXPVZNUMFKYQT | COC1=CC=C(NS(=O)(=O)C2=CC=C(OC3=C(C=CC=C3)    | 0.267813 | 0.26917  |
| CLCZTVMOKLEKO  | CC(C)(C)C1=CC=C(C=C1)C(=O)NC2=CC=C(CN3CCS(=   | 0.243838 | 0.227962 |
| JACFQTMRYXXVCX | COC1=CC=C(C=C1)C2=NNC=C2CN3CCC(O)(CC3)C4      | 0.291155 | 0.282903 |
| VDYRINLHVJBFDA | CC1CN(CC2=CSC(=N2)C3=CC=C(Cl)C=C3)CC(C)O1     | 0.245287 | 0.23645  |
| FSMVIBBHLWPBMC | CCOC1=C(OC2=C(F)C=NC(Cl)=N2)C=CC(\C=N\NC3=    | 0.240704 | 0.229467 |
| LQJPHZXMKIKHMK | CCN(CC)C1=CC=C(C=C1)\C=N\NC2=NC(C)=CC(C)=N    | 0.272524 | 0.225564 |
| BWYOTOAMUYEMBT | ClC1=CC=C(C=C1)C2=NC3=C(C=CC=C3)C(NCCCN4C     | 0.275294 | 0.237932 |
| NFOJBMIMTCWPBX | COC1=CC=C(C=C1)[N+]2=C3CCCN3C=C2C4=CC=CC      | 0.282391 | 0.251367 |
| ZPMLWCNMSTVVDE | CCC1(C)CC(CCNCC2=CC=C(C=C2)N(C)C)(CCO1)C3=    | 0.251506 | 0.233403 |
| VSMBPTAACRCDOF | CN(C)CC(CCCCC(CN(C)C)C(=O)C1=CC=CC=C1)C(=O)   | 0.27641  | 0.244114 |
| MTAUNVGSPWPEJS | COC1=C(O)C(=CC=C1)C2=NC3=C(C=CC=C3)C(=N2)N    | 0.266349 | 0.257434 |
| LAMMKLVPNOMHMX | CCOC(=O)C1=C(CN2CCN(CCO)CC2)N(C3=C1C=C(O)     | 0.286902 | 0.251909 |
| CLZSZXFWIQZEED | CCOC(=O)C1=C(CSCC2=CC=CC=C2)OC3=C1C(CN(C)     | 0.250397 | 0.245633 |
| HXVLXVBIEVNEAI | FC1=CC=C(NS(=O)(=O)C2=CC=C(C=C2)C(=O)N3CCN    | 0.251077 | 0.232258 |
| LPGPLBXMFLZLNY | CN(CC(=O)NC1=CC(=CC=C1)S(=O)(=O)NC2=NCCCC     | 0.265744 | 0.247572 |
| NSBIQDPNYPJSLY | CN(C)S(=O)(=O)C1=CC(NC(=O)CN2CCC3=C(C2)C=CC   | 0.241224 | 0.223781 |

|                |                                              |          |          |
|----------------|----------------------------------------------|----------|----------|
| DTPXOPHEXZTIJV | CC1=CC=C(C=C1)S(=O)(=O)NC(C)(C)CN2CCC(CC3=C  | 0.267347 | 0.258843 |
| PHSKGWBKURXITR | COC1=CC(O)=C(C=C1)C2=C(C3=CN(N=C3)C4=CC=C1   | 0.271078 | 0.240959 |
| AIUYBISEZVZGCT | CC1=CC=C(C=C1)N2C=C(CN3CCC(O)(CC3)C4=NC=C    | 0.278107 | 0.259731 |
| GQYOFTMNGJXJKO | CN1C=CN=C1CN2CCN(CC3=CN(N=C3C4=CC(C)=CC      | 0.297937 | 0.26921  |
| ZRGMBGUBVCLYQ  | CCN1CCC(CNCC2=CN(N=C2C3=C(CI)C=CC=C3)C4=(    | 0.33463  | 0.324295 |
| QFFCLOOUBDASLM | CC1=C(CN2CCC(CO)(CCOC3=CC=CC=C3)CC2)NC4=     | 0.240687 | 0.237114 |
| LNEWQDFILQEPQS | C(CNCC1=CN=C1C2=C3C=CC=CC3=CC=C2)CN4N=       | 0.293704 | 0.281922 |
| BWXVQCRKPHRWF  | CN(CC1=CC=C(OCC(O)CN2CCCC2)C=C1)CC3=C4C      | 0.251128 | 0.226063 |
| ZVVQHARLDKPBTD | CCC(CC)NCC(O)COC1=CC=C(Br)C=C1               | 0.247657 | 0.232807 |
| LKSAYGICQRLOOE | COCC(C)\N=C(/S)NCCC1=C(CI)C=C(CI)C=C1        | 0.259951 | 0.229262 |
| DWXSWTXNVTTWDK | COC1=CC=C(C=C1)C(CNC(S)=NCC2=CC=CC=C2)N3C    | 0.256302 | 0.241166 |
| WMFATYUZVIJFRF | CC(C)C1=CC=C(C=C1)N=C2N=C(N)C3=C2C=CC=C3     | 0.252981 | 0.238443 |
| OORGOYKNVOPPRY | ClC1=C2C=CC=NC2=C(OC(=O)C3=CC=CC=C3)C(CN4    | 0.243563 | 0.247567 |
| OASGMNNTQISCE  | OC(CNCC1(CCCCC1)N2CCCC2)COC3=C(CI)C=C(CI     | 0.258295 | 0.25376  |
| CCJWRQJDAJKRW  | CC1=C(CI)C=CC(OCCCCN2CCCC2)=C1               | 0.264688 | 0.246068 |
| AYVPLULUJAHKKX | COC1=CC(OC)=C(NC(=O)C2=C3C=CC=CC3=NC4=C2     | 0.245782 | 0.239618 |
| PNGOQSXNWXMLT  | CN(C1=CC=CC=C1)C2=NC(N3CCCCC3)=C(C(N)=N2     | 0.244985 | 0.222736 |
| QNFHCWXWQLNHQX | C\C(=N/N1CCN(CC2=CC=C(CI)C=C2)CC1)C3=CC=C(I  | 0.240014 | 0.253609 |
| QTADTPSSBBVBQA | [O-][N+](=O)C1=CC(\C=N\N2CCN(CC3=CC=C(CI)C=C | 0.26739  | 0.283421 |
| CJMNNPHUGBJINN | COC1=C(C=CC=C1)N2CCN(CC2)\N=C\C(CI)=C\C3=C   | 0.28034  | 0.252085 |
| GKDCYDHTHCBRLI | C\C(=N/N1CCN(CC2=C(CI)C=CC=C2)CC1)C3=CC=C(I  | 0.320304 | 0.328814 |
| SWTMHBFDSGLJKE | NC1=C(C(NC2=CC(CI)=CC=C2)=NC(NCCCN3CCOCC:    | 0.265369 | 0.228365 |
| TXSMRDKQYDZAO  | OCl(=O)(=O)=O.CCOC1=CC=C(C=C1)C2=CC(C3=CC=   | 0.252279 | 0.268221 |
| GGHVOBZSGLNUTN | OC(CNCCC1=CC=CC=C1)COC2=CC=C(OCC(O)CNCC(     | 0.283613 | 0.251395 |
| XITSNPPPOFRDTN | OCl(=O)(=O)=O.CCOC1=CC=C(C=C1)C2=CC(C3=CC=   | 0.250594 | 0.24352  |
| FYKSUAVLSLEKNU | COC1=CC=C(OCC(=O)ON=C(N)C2=CC=C(OC)C=C2)C    | 0.299499 | 0.265177 |
| PTTFBJMAXQDBBB | CC1=CC=C(O1)C=N\N2CCN(CC2)C3C4=C(C=CC=C4     | 0.250765 | 0.226551 |
| CESGXMOSNLYWMO | O=C(CN1CCCCC1)NC2=CC=C(OC3=CC=CC=C3)C=C      | 0.24623  | 0.270643 |
| YPVMVWFHOJLRSK | CN1C(CC(=O)NC2=CC=C(Br)C=C2)C3=C(CC1(C)C)C=  | 0.268624 | 0.250508 |
| XWBHWYITYBXWOS | CN1CCN(CC1)C2=NC=NC3=C2C=C(S3)C4=CC=CC=C     | 0.294347 | 0.289633 |
| ZLHWFOFDJUOUMH | COC1=CC=C(NC2=NC(CN3CCN(CC3)C4=CC=C(F)C=C    | 0.302261 | 0.262487 |
| CKEIFXSNZGOKPW | CCC1C(NC(C(C)C1=NO)C2=CC=CC=C2)C3=CC=CC=     | 0.267964 | 0.242368 |
| WXCGHDFZRVFFLV | CCCN1C(=NC2=C1C=CC=C2)N3CCN(CC4=CC=C(CI)(    | 0.241457 | 0.237568 |
| TYBAKKFHVSVDKH | COC1=CC(CN2CCN(CC3=CC=C(SC)C=C3)CC2)=C(OC    | 0.269203 | 0.273619 |
| ZZFRROOYRMMSET | CC1=NC(N=C(N)N)=NC2=C(C)C=CC=C12             | 0.26533  | 0.241739 |
| ASDMBUDPVLVAHA | COC1=CC=C(C=C1)N2CCC3=C(C)N=C4C(OC)=CC=CC    | 0.292048 | 0.28571  |
| NFZVJHWAJYJGOY | CN1CCN(CC1)C2=CC=C(C=C2)C3=NC4=C(C=CC=C4     | 0.278393 | 0.259369 |
| XYFRLVLKALKQQZ | COC(=O)C1CCN(CC2=CC=C(OCCCN3CCN(CC3)C4=C     | 0.260239 | 0.230887 |
| HUNJLBDDZDWCKK | COCCCNCCC(CCC(C)C)C1=CC2=C(OCO2)C=C1         | 0.282553 | 0.252634 |
| JBGHJXWBNDFTSA | CN(C)CCCNC1=C2CCCC2=NC3=C(C(C)=NN13)C4=      | 0.288982 | 0.266451 |
| OWGLMKKLVSBNQO | CCN1CCN(CC1)C2=CC(=NC3=C(C(C)=NN23)C4=CC=    | 0.254957 | 0.232975 |
| XMQCHSRAEXBLI  | CC1=NN2C(N=C3CCCC3=C2NCCN4CCOCC4)=C1C        | 0.261232 | 0.231113 |
| JMOFBGHQYQUSHG | CN(C)CCCNC1=CC(=NC2=C(C=NN12)C3=CC=CC=C3     | 0.239629 | 0.233864 |
| GISIYNAFXBOWDC | CC1=CC=C(C=C1)C2=C[N+](CC3=CC(CI)=CC=C3)=C4  | 0.2569   | 0.26113  |
| OBYWVKBVUSCYQS | CN(C)CCCNC1=NC(=NC2=C1C3=C(CCCC3)S2)N4N=     | 0.270503 | 0.246747 |
| QELWKQFMKISWQR | CN(C)CCNC1=NC(=NC2=C1C3=C(COC(C)(C)C3)S2)N   | 0.265749 | 0.23     |
| JEXXVBQPAVICRW | CCN(CC(=O)NC1=C(C=CC=C1)C2=CC=CC=C2)CC3=N    | 0.252206 | 0.235624 |
| UNMDHILIMVHBQR | CCN(CC)CCNC(=O)C1=CC=C(NC(=O)C2=CC=C(CI)C=   | 0.249184 | 0.235051 |

|                 |                                             |          |          |
|-----------------|---------------------------------------------|----------|----------|
| ZEUJCYADFATLCX  | NC(N)=NC(S)=NC1=CC=C(Cl)C=C1                | 0.27714  | 0.263459 |
| XHNDJXVUEBFYGM  | CC1=C(C)C2=C(N1)C=CC3=C2C=CC=N3             | 0.249907 | 0.228631 |
| AJTPQUQBGRYBEE  | C1NCC2=C3C=CC=CC3=CC=C2C1C4=CC=CC=C4        | 0.337474 | 0.290287 |
| XLFUVMNKHCIQDM  | CN1C=NC(=C1)SC2=CC=C(Br)C=C2)[N+](O)=O      | 0.252251 | 0.223628 |
| SYLIEQPXLCNFKC  | [O-][N+](=O)C1=CC2=C(OC3=C(C=CC=C3)N=C2)C=C | 0.253406 | 0.232689 |
| GUYLKDVAVXYBGJ  | CS\C(S)=N\C1=CN=CC=C1                       | 0.253795 | 0.246864 |
| LISDNWVJPBZAES  | COC1=CC=C(C=C1)C2=NNC(=C2)C3CCN(CC4=CC=C(   | 0.263799 | 0.2401   |
| XZRWTNCPHHCOSV  | FC(F)(F)C1=CC(CN2CCC(CC2)C3=CC(=NN3)C4=CC=C | 0.247942 | 0.236525 |
| DKFBCULBTJRMBM  | COC1=CC=C(C=C1)C2=NC(=NC=C2)C3=CC=C(O)C=C   | 0.252528 | 0.27386  |
| FFBROMLEGXOUHZ  | COC1=CC=C(C=C1)S(=O)(=O)N2C(C)COC3=C2C=CC=  | 0.248219 | 0.22579  |
| NOPGOGLCTNBNT   | CN1N=CC2=C1N=C(NC3=C(Cl)C=CC=C3)N=C2NC4=    | 0.253357 | 0.231839 |
| BVTCELZGBMCJOG  | COC1=C(C)C(C)=C(C=C1)C2=NC(CN3CCCC3C4=NC    | 0.261985 | 0.246452 |
| NKVJFSGYMQEBRF  | CN1C=CN=C1CN2CCN(CC3=CN(N=C3C4=CC=C(F)C:    | 0.27814  | 0.253552 |
| BKWIAAHRGPGSJH  | CN1C=CN=C1CN2CCN(CC3=CN(N=C3C4=CC(F)=CC:    | 0.261297 | 0.263301 |
| HVQSTRGEJFIASM  | COCCN(C)CC1=CN(N=C1C2=C(C)C=CC=C2)C3=C(F)C  | 0.240854 | 0.247228 |
| JEJASUKMKLSUAG  | COC1=CC2=C(NC(CN3CCC(CO)(CCOC4=CC=CC=C4)    | 0.254969 | 0.244162 |
| LQILTFJSNUBKIM  | CC1=C(CN2CCN(CC2)C3=C4C=CC=CC4=NC=N3)N=C    | 0.240454 | 0.233574 |
| VUPZYWWTUXURLT  | COC1=CC=CC(OC)=C1CN2CCCC(C2)C(=O)C3=C(SC)(  | 0.279529 | 0.275708 |
| ZVTIQPCPFQIKLD  | CN(CC1=NC(CC2=C(Cl)C=CC=C2)=NO1)CC3=C(C)C=  | 0.272423 | 0.254967 |
| RHHUEMKHXMZVIG  | OC(COC1=CC=C(CNCCC2=CC=C(C=C2)C(F)(F)F)C=C1 | 0.2749   | 0.243953 |
| ATLFDMCREQQYDN  | CC(C)N(CC1=CN=C1C2=CC=C(C=C2)C3=CC=CC=C:    | 0.298228 | 0.278083 |
| NGHHORJGYXYTFP  | CN(CC1=NC=CN1)CC2=CN(N=C2C3=CC(C)=CC=C3)(   | 0.292327 | 0.298266 |
| SHPMMJCTFKAWSG  | COC1=CC(OC)=C(C=C1)C(=O)C2CCCN(CC3=CC=CN3   | 0.280121 | 0.255535 |
| SCKXXJKTIMSHFN  | CC1=CC(C)=NN1CCNCC2=CN(N=C2C3=CC=C(F)C=C    | 0.284936 | 0.318493 |
| LWWQELLQYMRXGU  | COC1=CC=C(C=C1)N2C=C(CNCCC3=NC(C)=CC(C)=N   | 0.298839 | 0.268858 |
| AZCGPYGJRIQRDE  | CC(C)CCC1=NOC(CN(CC2=C(C)N(C)N=C2)C(C)C)=N  | 0.333518 | 0.327707 |
| BJKHXRFRWQAEJY  | OCC2(CC1=CC=CC=C1)CCN(CC3=CN=C(N=C3)C4=C    | 0.269714 | 0.242582 |
| CRQIKGNLEOGTIN  | CCOC1=CC=C(CN2CCN(CC3=C(C)C4=C(N3)C=CC(OC   | 0.272365 | 0.239301 |
| ZFVPIXKVMQGBF   | CN(CC1=CN(N=C1C2=CC3=C(OC3)C=C2)C4=CC=C     | 0.247279 | 0.247783 |
| NXEZLRVOZPTHCO  | FC1=C(C=CC=C1)C2N(CC3=CC=CN3C4=NC=CC=N4)    | 0.25786  | 0.237856 |
| DPXMBHSCQSNZNF  | CCN1C=C(CN2CCC3=C(NC4=C3C=CC=C4)C2C5=CC     | 0.255505 | 0.244387 |
| FZZITNVNCBBRBU  | CCOC(=O)C2(CCOC1=CC=CC=C1)CCN(CC3=CC(OC)=   | 0.298234 | 0.260206 |
| SXOOYBILAWOAI   | CCOC(=O)C2(CCOC1=CC=CC=C1)CCN(CC3=CC(=CC:   | 0.2896   | 0.25803  |
| UFLOKYHSVZBTGE  | CCOC(=O)C2(CCOC1=CC=CC=C1)CCN(CC3=C4OC(O    | 0.264064 | 0.24745  |
| KTCKKCPJMYCGME  | CCOC(=O)C2(CCOC1=CC=CC=C1)CCN(CC3=CC=C(C)   | 0.292606 | 0.286626 |
| VTCZAKBGYDAQQS  | CCOC(=O)C2(CC1=CC(OC)=CC=C1)CCN(C\C=C\C3=C  | 0.259105 | 0.240581 |
| RPSOYZFVEBMXDL  | CC1=CC=C(C=C1)C2(CCCC2)C3=NOC(CN4CCC(CC4    | 0.258556 | 0.247739 |
| TXJZLJKSHRENRC  | CCOC1=CC=C(C=C1)C2=NC(CN(C[C@@H]3CCC(=O     | 0.240256 | 0.246538 |
| ZKQMCVOQCUTTRA  | CCOC(=O)C2(CCCC1=CC=CC=C1)CCN(CC3=CN(CC)N   | 0.275591 | 0.265289 |
| AAKWMGDOOVHENN  | CCOC1=CC=C(C=C1)C2N(CCCN3C=CC=N3)CCC4=C:    | 0.287418 | 0.272472 |
| WDDPZZJXKJWGGZ  | CCOC(=O)C2(CCCC1=CC=CC=C1)CCN(CC3=CN=C(C)   | 0.270092 | 0.260165 |
| FWCRHJYCKFZIAA  | COC1=CC=C(C=C1)N2C=C(CN(C)C(C)C3=NC=NC=C3   | 0.313366 | 0.337073 |
| UUIFWRRRIYLZGPG | CN1N=C(C)C(CN(CC2=C(C)OC(=N2)C3=C(C)C=CC=C: | 0.242598 | 0.235796 |
| URHPYQXCXXUSFX  | COC1=C(C=C(F)C=C1)C(=O)C2CCCN(CC3=CN(C)C4=  | 0.261262 | 0.249949 |
| HOMIBDDRDRDEFOM | CN1C=C(CN2CCN(CC2)C3=CC=CC(C)=N3)C(=N1)C4   | 0.295833 | 0.294717 |
| NJDIJLHVGRJXHQ  | CCN1N=C(C)C(CN2CCC3=C(NC4=C3C=CC=C4)C2C5    | 0.241632 | 0.241331 |
| WTEOAHRLJGTWRZ  | CC1=CC=C(C=C1)N2C=C(CNCCC3C=CC=N3)C(=N2     | 0.326539 | 0.286632 |
| ZMNCFUGXZWTEJY  | CCOC1=CC=C(CN2CCN(CC3=CN=C(S3)C4=CC=CC=C    | 0.258687 | 0.246593 |

|                 |                                              |          |          |
|-----------------|----------------------------------------------|----------|----------|
| FYLLKYZNUBYPTL  | CCOC1=CC=C(CN2CCN(CC3=C(C)C4=C(N3)C=CC=C4    | 0.263892 | 0.241241 |
| WLSLGSJWJNXZXCC | FC1=C(C=CC=C1)C2N(CC3=COC=C3)CCC4=C2NC5=     | 0.25177  | 0.235691 |
| UWUPTKFUSXZFGD  | CCOC(=O)C2(CC1CC1)CCN(CC3=C(F)C=C(OC)C=C3)C  | 0.260745 | 0.250654 |
| SXMJDSFQLMRDNK  | CC(C)(O)C#CC1=CC=C(CN2CCCC(CO)(CC3=CC(CI)=C  | 0.270848 | 0.280665 |
| QUKGSOVSHLCELK  | CN(CC1=CN(N=C1C2=CC(F)=CC=C2)C3=CC(C)=CC=C   | 0.251654 | 0.236351 |
| YDAHVNIORWJIV   | CCN1C=CN=C1CN(C)CC2=CN(N=C2C3=CC=CC=C3)C     | 0.259199 | 0.260277 |
| BCGMXKJUZYVGMJ  | CCOC(=O)C2(CCCC1=CC=CC=C1)CCN(CC3=NC=CN3     | 0.258787 | 0.237047 |
| MDPMYGUAEAFIOS  | CC(C)N1CCC(CC1)N2CCN(CC3=CC=C(O3)C4=CC=C(C   | 0.301944 | 0.283331 |
| ZFWTTCOXZVMVOQ  | COC1=CC(OC)=C(C=C1)C2=NC(CN3CCN(CC3)C4=C5    | 0.287302 | 0.271653 |
| WJBXZNPTDXCVCV  | CN(CC(O)COC1=CC=C(CNCC2=CC=C(CI)S2)C=C1)CC   | 0.27998  | 0.26714  |
| VVEYWVLTXOWUHL  | FC1=CC=C(C=C1)N2C=C(CNCCC3=NC=CC=C3)C(=N:    | 0.240448 | 0.230318 |
| DQWOYLXISLTHQD  | ClC1=CC=C(C=C1)C(=O)C2CCCN(CC3=CN(N=C3)C4=   | 0.264797 | 0.242637 |
| YZSCVGMHSCGXIL  | ClC1=CC=C(C=C1)C(=O)C2CCCN(CC3=CC=CN3C4=N    | 0.268223 | 0.26     |
| JBYLARROVLVBI   | COC1=C(CN2C=CC=N2)C=C(CN3CCCC(C3)C(=O)C4=    | 0.272578 | 0.244856 |
| QCAJALZNRVYHKS  | COC1=CC=C(C=C1)N2C=C(CNC3CCOCC3)C(=N2)C4     | 0.269882 | 0.255683 |
| IJFWMGUGQKMKQO  | COC1=CC=C(CC2(CO)CCN(CC3=CC4=C(OC3)C=CC(C    | 0.241667 | 0.232226 |
| QWVDJMDVHANWSM  | CCN1C=CN=C1CN(C)CC2=CN(N=C2C3=C(F)C=C(OC     | 0.28318  | 0.294583 |
| GMQBGSKUGGMPAM  | CC(=C)[C@H]1CCC(CN2CCC(CC2)N3CCC(CC3)C(=O    | 0.256356 | 0.225917 |
| AFVLYIBFUZRBPV  | CN(C)CCCNCC1=CN(N=C1C2=C(C)C=CC=C2)C3=C(F    | 0.309858 | 0.29561  |
| ZKGRBJTINVQJAX  | CSC1=CC=C(C=C1)C2=NC(CN3CCCCC3C4=CN=CC=C     | 0.264526 | 0.281828 |
| RTUWXPJUIDPBCJ  | COC1=CC(=CC=C1)C2CCCN2CC3=C(C)OC(=N3)C4=C    | 0.283431 | 0.281323 |
| NRBUOGJEVXEQAN  | CC1=CC(N2C=C(CNCCC3C=CC=N3)C(=N2)C4=CC=      | 0.308348 | 0.30825  |
| SZSCDZKFQNVGHY  | CC1=NC=CN1CCCNCC2=CN(N=C2C3=CC=C(F)C=C3      | 0.257305 | 0.244487 |
| DESKVDNHFKWY    | CC1=NC(CN2CCCC(C2)C(=O)C3=C4C=CC=C5CCC(C     | 0.251009 | 0.225967 |
| LOHJNFDYGMTSN   | O=C(C1CCCN(CC2=NC=CC=C2)C1)C3=C4C=CC=C5C     | 0.245029 | 0.244134 |
| CQUHQOPIXROFE   | FC1=CC=C(C=C1)N2C=C(CNCCC3=CN=CC=C3)C(=N:    | 0.245442 | 0.231721 |
| OHKFNYSXZJVFSQ  | COC1=C(OC)C=C(CC2=NOC(CN3CCN(CC3)C4=NC=C     | 0.274912 | 0.255529 |
| NPRLULMTXBRZO   | C(N1CCN(CC1)C2CCC3=C(C2)C=CC=C3)C4=NC(CC5    | 0.258106 | 0.249856 |
| BAASLYURXOHEG   | ClC1=CC=C(C=C1)C(=O)C2CCCN(CC3=CC4=C(C=C3)   | 0.275734 | 0.246109 |
| MBPRRILZKATBFW  | CC1=C(C)C=C(C=C1)C2=NNC=C2CNCCC3=CN(N=C3     | 0.328881 | 0.297658 |
| CYWIWKYWLQBNBA  | CN1CCN(CC1C2=CC=CC=C2)C(=O)C3=NOC(COC4=C     | 0.266356 | 0.239293 |
| NQYQOXQABBZQSE  | OCCC1CN(CC2=NC3=C(C=C2)C=C(CI)C=C3)CCN1CC    | 0.244151 | 0.224524 |
| HBJGKNBCHGRSOA  | ClC1=CC=C(C=C1)C(=O)C2CCCN(CC3=C4N=CC=CC4    | 0.291363 | 0.284108 |
| NKGPKGBJGOADMH  | FC(F)(F)C1=CC(CC2=NOC(CN3CCC(CC3)C4=CC=NC=   | 0.280798 | 0.263281 |
| FHCZAQUUNSLAQY  | OCC2(CC1=CC(=CC=C1)C(F)(F)F)CCN(CC3=CC(F)=CC | 0.248576 | 0.225438 |
| NZEIDBTTWSYLCM  | COC1=CC=C(C=C1)N2C=C(CNC3CCN(C)CC3)C(=N2)    | 0.321016 | 0.323617 |
| HMXGHYPMLPTBOS  | CSC1=CC=C(CN2CCC(CO)(CC3=CC=C(CI)C=C3)CC2)C  | 0.310945 | 0.289902 |
| WOZVHZFFMRRFAK  | COC1=C(C=CC=C1)C2CCCN2CC3=C(C)OC(=N3)C4=C    | 0.285006 | 0.256603 |
| XASOOGGPNWVOCZ  | CSC1=CC(CN2CCC(CO)(CC3=CC(=CC=C3)C(F)(F)F)C  | 0.243689 | 0.227497 |
| BPMSQKCYNZZCDL  | COCC1=CC=C(CN2CCC3=C(NC4=C3C=CC=C4)C2CC      | 0.246559 | 0.231843 |
| ZUYMJOIZOUJQTC  | CCN1C=C(CNCC2=CN(C)N=C2C3=CC=C(C=C3)C4CC     | 0.278854 | 0.288496 |
| VCCRFAZUYUPLNS  | COC1=C(C=C)CN2CCCC(CO)(CC3=CC(CI)=CC=C3)C    | 0.26524  | 0.242025 |
| GBGWEVIXWLGSZR  | COC1=CC=C(C=C1)N2C=C(CN(C)C3CCOCC3)C(=N2)    | 0.294175 | 0.289015 |
| JIUQYIJYFWHPQM  | CCN1C=CN=C1CN2CCCC(C2)C(=O)C3=CC4=C(C=C3)    | 0.24044  | 0.23146  |
| NWYWRJMNFOBIMX  | CC(CC1=NC=CN=C1)NCC2=CN(N=C2C3=CC(C)=CC=     | 0.250031 | 0.240456 |
| JBNWRZAPHBAVBQ  | COC1=C2N=CC=CC2=C(CN(C)CC3=NC(CC4=CC(F)=C    | 0.295917 | 0.275856 |
| DVVMTXGLVWUGGB  | COCC1CCN(CC2=CN(CC3=CC=CC=C3)N=C2C4=CC5      | 0.273896 | 0.250579 |
| LCRFBQZLFWFDCF  | COCCN1CCCC(CNCC2=CN(C)N=C2C3=CC=C(OC4=C      | 0.256728 | 0.239629 |

|                 |                                               |          |          |
|-----------------|-----------------------------------------------|----------|----------|
| LRMNRVWEHOCALO  | COCC1CCCN(CC2=CN(CC3=CC=CC=C3)N=C2C4=CC       | 0.253022 | 0.262312 |
| GKNIJVSASFJETKG | CC(C)CC1=CC(CN2CCCC(CO)(CC3=CC(Cl)=CC=C3)C    | 0.272795 | 0.24517  |
| LXRHZPIGVAAUCI  | CCC(O)C1CCN(CC2=CN(N=C2C3=CC(F)=CC=C3)C4=     | 0.262783 | 0.246725 |
| VDQDSCLUERDOST  | COC1=CC(OC)=C(C=C1)C(=O)C2CCCN(C\C=C\C3=C(    | 0.256299 | 0.23388  |
| KQFDPMQZRUTXPA  | COC1=CC2=C(C=C1)C=C(C=C2)C(=O)C3CCCN(CC4=     | 0.242492 | 0.228318 |
| KXEYVFAGHLNOEV  | CC1=CC(=C(C)S1)C2=NN(C=C2CN3CCN(CC3)C4=NC     | 0.315825 | 0.30232  |
| NBFTWNLATVAUAM  | CN1C=C(CN2CCN(CC2)C3=CC(C)=NC(C)=C3)C(=N1)    | 0.351717 | 0.317014 |
| JNTZDXUUXYAWMU  | C1CCN(CC1)C2=C(NC3=NC4=C(C=CC=C4)N5C=NN=      | 0.278726 | 0.256042 |
| FEGIRYMCKCJPBY  | COC1=CC=C(CNC(=O)C2CCCN(CC3=C(C)OC(=N3)C4     | 0.262053 | 0.250767 |
| XHQUMJLPQUTNMD  | N#CC1=CC(NC2=C3C=CC=CC3=NC4=C2CCCC4)=CC       | 0.273336 | 0.241627 |
| LBXANFQOQNCQEL  | COC1=CC=C(C=C1)N2N=C(C(NC3CCN(CC4=CC=CC=      | 0.255715 | 0.266417 |
| YJJJRJVBTWWBNG  | CC1CCN(CCCNC(S)=NC2=CC3=C(C=C2)N=C(C=C3C)     | 0.262216 | 0.235064 |
| OJMCRNNZWOYFQJ  | [O-][N+](=O)C1=CC=C(NC(=O)NCCCN2CCN(CC2)C3=   | 0.258754 | 0.242245 |
| MBKCLKGGOYNYQAP | CCCN(CC)CCCN(C(S)=NC1=CC2=C(C=C1)N=C(C=C2)    | 0.258662 | 0.255857 |
| NZORQKRPSGFQLE  | CN1CCN(CC1)C2=NC3=C(C=C(C=C3)N=C(S)NCCCN4     | 0.284264 | 0.286762 |
| XKGYMEZDXUIVFP  | CN1CCN(CC1)C2=NC3=C(C=C(C=C3)N=C(S)N4CCN(     | 0.252002 | 0.245936 |
| LMOVQMOCYLFXKH  | CC1CN(CCN1C2=CC(C)=CC=C2)C(\S)=N\C3=CC4=C(    | 0.247228 | 0.227676 |
| WYYHHQCZFNMOCC  | COC1=CC=C(CNC(S)=NC2=CC3=C(C=C2)N=C(C=C3C)    | 0.271419 | 0.255258 |
| OOAYGBZBQZEBNW  | CN1CCN(CC1)C2=NC3=C(C=C(C=C3)N=C(S)NCC4=C     | 0.254174 | 0.222461 |
| CPMGALIDDQAPP   | CN1CCN(CC1)C2=NC3=C(C=C(C=C3)N=C(S)N4CCN(     | 0.257033 | 0.252008 |
| HLWSDOKFCOSYBI  | CCN(CC)C(\S)=N\C1=CC2=C(C=C1)N=C(C=C2C)N3C(   | 0.271394 | 0.237871 |
| RZCWMDFCFUXRLU  | CCCN1CCN(CC1)C(\S)=N\C2=CC3=C(C=C2)N=C(C=C    | 0.296176 | 0.262633 |
| XXUIMDJNJTYWQD  | CCN1CCN(CC1)C2=NC3=C(C=C(C=C3)N=C(S)N4CCC     | 0.244559 | 0.248819 |
| UNNVTXBVMHXGU   | CCN1CCN(CC1)C2=NC3=C(C=C(C=C3)N=C(S)N4CCN     | 0.290335 | 0.280486 |
| BNVIHRYZPJVFAS  | CCC(C)NC(S)=NC1=CC2=C(C=C1)N=C(C=C2C)N3CC(    | 0.259532 | 0.246874 |
| UQNIQQMLYLZLQM  | CSC1=CC(=CC=C1)N=C(S)N(CCCN2CCN(C)CC2)CC3=    | 0.291621 | 0.296929 |
| RWYJVSJPESENBE  | COC1=C(Cl)C=C(C=C1)N=C(S)N(CCCN2CCC(C)CC2)C   | 0.276651 | 0.247328 |
| YZEQNCRVOVLQHO  | CC1=C(Cl)C=C(C=C1)N=C(S)N(CCN2CCCC2)CC3=C     | 0.25734  | 0.242072 |
| JHHUBMUZFNWBWF  | CCOC(=O)C1=CC=C(C=C1)N=C(S)N(CCCN2CCC(C)CC    | 0.262501 | 0.251372 |
| LRDUMMRCSWWHSH  | CC1=C(C=CC=C1)\N=C(/S)N(CC2=NC=CC=C2)CC3=C    | 0.256488 | 0.229267 |
| SEALYCBSEQDAOV  | CN1CCN(CCCNC(=O)C2=C3C=CC=CC3=C(NC4=CC(C      | 0.26436  | 0.24613  |
| SXFVOOSWOKCVKQ  | FC1=NC(F)=C(F)C(NCCCNC2=C(F)C(F)=NC(F)=C2F)=( | 0.254022 | 0.247994 |
| FXWJYMLMEYQWMJ  | C[N+]=C2SCC(=NN2C3=C1C=CC=C3)C4=CC=CC=C       | 0.239411 | 0.234227 |
| JRMYQNXXMWDWDFW | CC1=CC(OCCCCCN2C=CN=C2)=CC(C)=C1Cl            | 0.240322 | 0.223772 |
| AFYSBOFSBZXDRD  | FC(F)S(=O)(=O)C1=CC(=CC=C1)N=C(S)N2CCN(CC2)C  | 0.239131 | 0.265842 |
| ANWUINNDMYCNDD  | CC(N=C(S)NCCC1=CC=CC=C1)C(N2CCN(CC3=CC=CC     | 0.257279 | 0.244379 |
| OQEFVFGCTVHSMGW | COC1=CC(CN(CCC2=C(C)NC3=C2C=C(Cl)C=C3)C(S)=   | 0.241638 | 0.24943  |
| HCGFCVYNUZHUCW  | CN1CCN(CC1)C(=S)C2=CN(CC3=CC=C(Br)C=C3)C4=    | 0.249888 | 0.239238 |
| WKXMREPQLQSTHK  | [O-][N+](=O)C1=C(CN2CCN(CC3=CNC4=C3C=CC=C4    | 0.252779 | 0.241325 |
| PADZYLUAUOMXDT  | COC1=C(CNCC2=C(OC)C=CC(Br)=C2)C=CC=C1         | 0.278444 | 0.287123 |
| BFUYCBZDDJDIOZ  | [O-][N+](=O)C1=CC=C(CN2CCN(CC3=CNC4=C3C=CC    | 0.246226 | 0.248185 |
| KHXYGMHITFMSSB  | [O-][N+](=O)C1=CC(=CC=C1)C2=CC=C(O2)\C=N\NC3  | 0.268501 | 0.252761 |
| QDCSZEPGRRVZLO  | CCOC1=CC2=C(C=C1)N=CC(=C2N3CCC4(CC3)OCCC      | 0.238532 | 0.225095 |
| PNFMIJKJNPCKGZ  | CCOC1=CC2=C(C=C1)N=CC(=C2N3CCN(CC3)C4=CC      | 0.245611 | 0.235363 |
| YGQOFHZHVHYTLN  | CCOC(=O)C1=C(\N=C(/S)N2CCN(CC2)C3=C(OC)C=C1   | 0.244656 | 0.226149 |
| MRNQMYQVAKMUSY  | CN(C)CC1=C(N=C2C=CC=CN12)C3=CC=C(Cl)C=C3      | 0.253422 | 0.247562 |
| MYNKYKFAAVZKFR  | CC1=CC=C(CNCC(O)C2=CC=CC=C2)C3=CC=C(Cl)C=     | 0.242086 | 0.239388 |
| ZZJOTYVKOBLDMI  | CN(C)CCCN(C(=O)\C=C\C1=CC=C(OCC2=C(Cl)C=CC=   | 0.258783 | 0.222475 |

|                 |                                               |          |          |
|-----------------|-----------------------------------------------|----------|----------|
| RTVDPQBHFPOHDW  | [O-][N+](=O)C1=C(SC2=CC=C(Cl)C=C2)C=CC(CN3CC  | 0.307609 | 0.264825 |
| HRGXNVAXDCCHTJ  | CN1CCN(CC2=CC(=C(SC3=CC=C(Cl)C=C3)C=C2)[N+    | 0.298616 | 0.284681 |
| JOXFOVKOHKFZNG  | COC1=C2N=C(C)C3=C(N(CC3)C4=CC=CC=C4)C2=CC     | 0.29155  | 0.276597 |
| XWBNXNPYMCYTKF  | CCS(=O)(=O)C1=NC(=C(S1)N2CCC3=C(C2)C=CC=C3)   | 0.245572 | 0.241612 |
| MZVDBDZUJDCBSC  | CN(C)C1=NC(=NC(N\N=C\C2=CC=C(Cl)C=C2)=C1)N(   | 0.272075 | 0.263776 |
| KGYVKILQXKVVWJ  | COC1=C(\C=N\NC2=NC(=NC(=C2)N(C)C)N(C)C)C=CC   | 0.245308 | 0.225241 |
| XQRNYCRKOMTZFY  | BrC1=CC=C(\C=N\NC2=NC=CC=C2)C=C1              | 0.248384 | 0.255253 |
| IHAPMOBRYZOQFE  | CN(C1CCS(=O)(=O)C1)C2=NC(=CS2)C3=CC=C(Br)C=I  | 0.256848 | 0.256779 |
| KRDOFMHJLWKXIU  | C1CN(CCN1)C2=NSC3=C2C=CC=C3                   | 0.346153 | 0.312153 |
| HIFUXKJUQAFAJU  | CC1=CC=C(CN2CCN(CC3=C(F)C=CC=C3)CC2)C=C1      | 0.257033 | 0.272488 |
| WPKKEQCPXUTCDZ  | CCOC(=O)C1=C(C)C(C(=O)OCC)=C(N1)C=O           | 0.243017 | 0.22557  |
| RYSOBSPYPVTLDS  | CC(=O)C1=CC=C(NC2=C3C=C(C)C=CC3=NC(C)=C2)C    | 0.259518 | 0.224786 |
| FTFFGSFIZWGJIM  | [O-][N+](=O)C1=CC=C(C=C1)C2=CC=C(C=C2)S(=O)(= | 0.315625 | 0.285612 |
| AYRFKQUXGIWEFY  | FC1=CC=C(CN2C(=O)NC3=C2C=CC(=C3)C(=O)NC4C     | 0.278456 | 0.234759 |
| WAWROLBZXUSKFC  | CCN1C(=NC2=C1C=CC=C2)N3CCN(CC3)S(=O)(=O)C.    | 0.267299 | 0.233339 |
| JPLCIFZYVVSLL   | COC1=CC2=C(C=C1)N(C(C)C)C=C2)S(=O)(=O)C3=C    | 0.270344 | 0.236725 |
| IRCARNCHRGIKND  | ClC1=CC=C(C=C1)S(=O)(=O)NC2C(N3CCNCC3)C4=C    | 0.2799   | 0.25851  |
| SLQXSPDKMZEODT  | CC1=CC=C(C=C1)C2=C(O)C(CN3CCCC3)=CC(CN4C      | 0.262782 | 0.256331 |
| YFVRUSSYKPOITK  | CC1=CC(CN2CCN(CC2)C3=CC=C(Cl)C=C3)=CC=C1      | 0.239212 | 0.223985 |
| ZKUBYEOCFYGKNL  | CCCCCCCCNC(S)=NCCN1CCCCC1                     | 0.24313  | 0.231461 |
| FEXQYNVUMVIVGE  | O=C(CN1CCN(CC2=CC=CC=C2)CC1)NC3=C(C=CC=C      | 0.286331 | 0.272813 |
| LLAWTBLIBJUONA  | OC(C1CN2CCC1CC2)(C3=CC(Cl)=CC=C3)C4=CC(Cl)-   | 0.27959  | 0.282767 |
| NJFAWKDEUTVGF   | COC1=CC(OC)=C(C=C1)\N=C(/S)N2CCN(CC2)C(C3=(   | 0.299635 | 0.299326 |
| KQFAYSOEMKUZBH  | COC1=C(C=CC=C1)N2CCN(CC2)C(=O)C3=C(OC)C=C1    | 0.258672 | 0.229533 |
| NTQGEZJOMVFLMK  | CC1C(N(C)C(CC1(O)C2=CC=C(F)C=C2)C3=CC=CC=C:   | 0.258431 | 0.265185 |
| ISXPELHAGSCOTH  | CCOC1=C(NC2=C3C=CC(Cl)=CC3=NC=C2)C=CC=C1      | 0.29311  | 0.27042  |
| XSGLKSWEYRBHSW  | [O-][N+](=O)C1=CC(CN2CCN(CC3=CC=C(Cl)C=C3)CC  | 0.240172 | 0.24337  |
| SMIOHXYOEZYTOZ  | CN(C)C1=CC=[N+](CC(=O)NC2=CC=C(OC3=CC=CC=C    | 0.251263 | 0.237694 |
| GHWBMURKXUDZMP  | COC1=C(C=CC=C1)C(CC(=O)C2=CC=CC=C2)CC(=O)C    | 0.239785 | 0.226754 |
| NJNAIDUQVFTTBZ  | CCN(CC)CC#CC(OC)(C1=CC=CC=C1)C2=CC=CC=C2      | 0.279764 | 0.270153 |
| FVFRHLHSSWBPELS | COC1=CC(CN2CCN(CC3=C4C=CC=CC4=CC=C3)CC2       | 0.266086 | 0.272563 |
| LRXTUBHKBZJFDW  | CC1=CC(C)=NC(=N1)\N=C(/N)NCCC2=CNC3=C2C=C     | 0.250318 | 0.234308 |
| QCXXSOISNANRNA  | CC1=C(OCC2=NN=C(SCCN3CCCC3)N2)C4=CC=CC=C      | 0.263748 | 0.266668 |
| TWCMTPLQZRXYOY  | CCOC1=CC2=C(C=C1)N=C(NCC\N=C(/S)NCCCN(C)C'    | 0.250379 | 0.23992  |
| IHZFFUAIKZYKBM  | CCC1=CC=C(C=C1)N=C(S)NC2CC3CCCC(C2)N3CC4-     | 0.292323 | 0.291478 |
| IEZSNPNKNGWEET  | CC(C)CCN1N=NN=C1CN2CCN(CC2)C(C3=CC=CC=C:      | 0.244306 | 0.24019  |
| NGRYFJUARYBAHQ  | COC1=CC=C(C=C1)C2=C(N=CO2)C(=O)N3CCN(CC3)     | 0.246788 | 0.247485 |
| SXZLFLGASKUCKZ  | CC1=CC(C)=NC(\N=C(/N)NC2=CC=C(C=C2)C3=CC=C    | 0.285035 | 0.240165 |
| APGLINRJTWKNDT  | CN(C)C1=NC(=NC(N\N=C\C2=CC=CC=C2)=C1)N(C)C    | 0.250581 | 0.226467 |
| POGJCPKDTDNXJG  | SC(=NCCCC1CCOCC1)N2CCN(CC2)C3=NC(=CS3)C4      | 0.312367 | 0.291551 |
| VLTIUAUCHIASBMZ | CCNC1=NC(=NC(NC(C)C)C)=N1)N2CCCCC2            | 0.284845 | 0.282266 |
| BTGJNQZJPRUNAF  | COC1=CC(OC)=C(NC2=NC(=NC(NC(C)C)C)=N2)N3C     | 0.25456  | 0.223657 |
| WOSAORHVEAJOFC  | CC1=NC2=C(C=CC=C2)N1C3CCN(CC(=O)NC4=C(Br)     | 0.284494 | 0.266751 |
| GTCJGLXECMCTOG  | CN(C)CCNC1=C(C)C(C)=NC2=CC(=NN12)C3=CC=C(C    | 0.243241 | 0.225897 |
| BUMLQGZXHOSJCC  | COC1=CC(=CC=C1)C2=C(C#N)C(=NC(=N2)C3=CC=C(    | 0.296987 | 0.269863 |
| QFHIFJRXZPZTA   | CN1CCN(CC1)C2=C(C#N)C(=NC(=N2)C3=CC=CC=C3     | 0.270185 | 0.255549 |
| JAIcceXMYCENQ   | COC1=C(C=CC=C1)C2=C(C#N)C(=NC(=N2)C3=CC=C(    | 0.260517 | 0.235179 |
| QRAVHOBHERRTSC  | ClC1=CC=C(SCC2=NC(=NC(=C2)N3CCOCC3)C4=NC-     | 0.25652  | 0.243087 |

|                 |                                              |          |          |
|-----------------|----------------------------------------------|----------|----------|
| QWKVLFZMMXCIJ   | CC1=CC=C(CN2CCC(CC2)C3=CC(=NN3)C4=CC=CS4     | 0.253645 | 0.232882 |
| FKEBRCPVZPTAMC  | ClC1=CC(Cl)=C(C=C1)C2=NNC(=C2)C3CCNCC3       | 0.319792 | 0.328759 |
| LNOMSJXJZOIPW   | NC(N)=NC1=NC2=C(C=C(F)C=C2)C(=N1)C3=CC=CC=   | 0.244809 | 0.250059 |
| ACSLIDFTZZIDFE  | SC(=NCC1CCCO1)N2CCN(CC2)C3=NC(=CS3)C4=CC:    | 0.240433 | 0.224647 |
| XAAQJGCFNFXKST  | CCN(CC)CCCN(C(=O)C1=CC=CO1)C2=NC(=CS2)C3=(   | 0.269896 | 0.25182  |
| KTJNUFKBFSSJSB  | CN(C)CCCN(C(=O)C1=CC=CO1)C2=NC(=CS2)C3=CC:   | 0.263753 | 0.240424 |
| GGQOVVCIKFWMM   | CCN1CCN(CC1)C2=C(Cl)C=C(NC(=O)C3=CC=C(O3))   | 0.240272 | 0.235826 |
| UNAWHUIPJQHFOG  | CN(C)CC1=C(SC2=C(Cl)C=CC(Cl)=C2)C=C(F)C=C1   | 0.249136 | 0.272714 |
| FGNAPWDGOUVUBN  | CN(C)CCN(C)CC1=C(SC2=C3C=CC=CC3=CC=C2)C=C    | 0.273895 | 0.278928 |
| QZJSTFQILYOCCT  | CC1C2=C(SC(CCCN(C)C)C3=C1C=CC=C3)C=CC=C2     | 0.335755 | 0.341638 |
| HVBFDMQTIYPSNN  | O=C1CC2=C(SC3=C1C=CC(OCCCN4CCCC4)=C3)C=      | 0.251251 | 0.227296 |
| CBYVLYPUADKSDZ  | CN1CCC(CC1)OC2=C(SC3=CC=CC=C3)C=CC=C2        | 0.315954 | 0.287168 |
| HTQNTTWSGOYWOJ  | CN1CCN(CCOC2C3=C(CSC4=C2C=C(Cl)C=C4)C=CC=    | 0.323286 | 0.304419 |
| VGDJMCOVGPXEGS  | COC1=C(OCC2=CC=C(Cl)C=C2)C(Br)=CC(CNC(C)C)C  | 0.251032 | 0.235164 |
| FCHFYDCSAICDEA  | COC1=C(C=CC=C1)N2CCN(CC(O)COCCOC3=CC=C(B     | 0.280406 | 0.252001 |
| BMQGWQJMFCYXPU  | ClC1=CC2=C(SCC3=C(C=CC=C3)C2OC4CN5CCC4CC     | 0.322556 | 0.303729 |
| CCBMGCPPZDFKPKQ | CC1=CC(C)=NC(NN=C(C2=CC=CC=C2)C3=CC=CC=C3    | 0.27305  | 0.284865 |
| BVSAILCTPWDKAT  | CCN(CC)CCN(CC1=CC2=CC=C(C)C=C2NC1=O)C(\S)=   | 0.25092  | 0.22305  |
| REHMQQADKYVDHV  | CNC(S)=N\N=C\C1=CC(Br)=C(OCC2=CC=CC=C2)C=C   | 0.242463 | 0.279242 |
| KWSJNROGXMPADP  | CCOCCCNCC1=CC=C(OCC2=C(Cl)C=CC=C2)C=C1       | 0.255571 | 0.245106 |
| LAADJKRGIQNHQR  | [O-][N+](=O)C1=CC(=C(C=C1)N2N=NN=C2C3=CC=C1  | 0.258616 | 0.226826 |
| HUMOBQPLLCZOHC  | CCC1=CC=C(OCCOCC(O)CN2CCN(CC3=CC=C(Cl)C=C    | 0.250814 | 0.238179 |
| VFJLWYJYPAVLE   | COC1=C(OCC(O)CN2CCN(CC3=CC=C(Cl)C=C3)CC2)    | 0.259195 | 0.263504 |
| PEDWTSPDIWXPOU  | COC1=CC=C(NC2=NCC(CC3=CC=C(Br)C=C3)S2)C=C:   | 0.268625 | 0.26494  |
| DGZUNQTZDDPLAE  | CN(C)CC1=C(SC2=C3C=CC=CC3=CC=C2)C=CC=C1      | 0.299987 | 0.30102  |
| PIRXOVWZBWSEMM  | FC1=C(CN2C(=N)N(CCC3=CC=CC=C3)C4=C2C=CC=C    | 0.252453 | 0.269021 |
| YAPHWQFSXRJHAD  | OCCCN1=C(N=NC(=N1)C2=CC=C(Cl)C=C2)C3=CC=     | 0.240447 | 0.237094 |
| YEJLKGBVTVLUJU  | BrC1=CC=C(CN2C3=C(CCC3)C(=N)C4=C2CCCC4)C=    | 0.274666 | 0.270142 |
| NBDSXQFFUYCQTN  | CCCC1=NC(=C(N1CC(C)C)S(=O)(=O)C2=CC=CC=C2)   | 0.251224 | 0.229472 |
| QRLIGEHLZYBXOP  | CC1=CC=C(SCCOCCN2CCC3=C(C2)C=CC=C3)C=C1      | 0.244674 | 0.24244  |
| JFUFOHQSLUKCSH  | CN1CCC2=C(\N=C3/CCCN3CC4=CC=CC=C4)C5=C(C     | 0.246444 | 0.222821 |
| FXMCSZOBLACMJZ  | ClC1=C(Cl)C(NC(=O)NC2=CC=CC=C2)=CC=C1        | 0.248275 | 0.248025 |
| SEUJBLRENKKWQS  | CN(C)C1=CC=C(\C=N\N=C(/S)NCC2=CC=CO2)C=C1    | 0.239495 | 0.22328  |
| FNFERHAIGOPDW   | CCN(CC)S(=O)(=O)C1=C(C=CN=C1)N2CCN(CC2)C3=   | 0.242626 | 0.243129 |
| VIEAOLWFSGPFPM  | N=C1N(CC2=CC=CC=C2)C3=C(C=CC=C3)N1CC4=CC     | 0.305787 | 0.287584 |
| MNSXBNKPPDYZMT  | CCOC(=O)C1=C(C)N(C)C(C)=C(C1C2=CC=C(Cl)C=C2) | 0.273268 | 0.287081 |
| XXHHSTVXSOGSM   | ClC1=CC(Br)=C(OCCCCCN2CCCC2)C=C1             | 0.32767  | 0.301302 |
| IJGCPZWDASZGQN  | CN(C)CCOC(C1CCCC1)C2=C(C)C=CC=C2C            | 0.277709 | 0.262598 |
| RUWJWJOWWHKQPF  | CC(C)NCCOC(C1=CC=CC=C1)C2=C(C)C=C(C)C=C2C    | 0.276389 | 0.264634 |
| NPMCVFRTRDHRA   | CO\N=C\C1=CC(OC)=C(OC2=C(C=C(C=C2))[N+][O-]) | 0.266407 | 0.280669 |
| APJRCYYMTABKQQ  | CC1=CC=C(C=C1)C2=NC(=C(O2)N3COCC3)P(=O)(C    | 0.240825 | 0.250364 |
| HPWRLPQMPREEMM  | OCl(=O)(=O)=O.CC1=CC=C(C=C1)C2=CC(C3=CC=C(C  | 0.244044 | 0.245103 |
| UPGPCOREBWFJLY  | COC1=CC=C(C=C1)N2CCN(CC2)C3=NC(NC4=CC=C(I    | 0.259064 | 0.252913 |
| GPLGXZOMVXBMDO  | COC1=C(OC)C=C2C(=C1)N=C(N=C2N3CCN(CC3)C4:    | 0.249084 | 0.25767  |
| GLWJYTMHGSPNN   | C1COCCOCCOC2=C(OCCOCCOCCOC3=C(OCCOCCC        | 0.294678 | 0.297417 |
| MABYJMBBOLWQDW  | CC1=CC(C)=C(C[N+]=CC(=CC=C2)C3=CC=CC=C3)C:   | 0.276327 | 0.265793 |
| QTGLIGIORIFWRD  | OC(COCCOC1=CC=C(Br)C=C1)CN2CCN(CC3=CC=CC     | 0.272882 | 0.231642 |
| UOAKYFGDTSZLLF  | CCOC1=CC=C(NC2=NC(=NC(Cl)=N2)N3CCN(CC3)C4    | 0.252391 | 0.251175 |

|                  |                                               |          |          |
|------------------|-----------------------------------------------|----------|----------|
| APABSGRYLLJSEU   | CCOC1=C(OCC)C(CI)=CC(CNCCC2=CNC3=C2C=CC=C     | 0.257183 | 0.226437 |
| NATUZEAPAOKDTI   | CC(NCC1=CC=C(C=C1)C2=CC=CC=C2)C(O)C3=CC=C     | 0.254034 | 0.258486 |
| FYXJNIGRTLZK GK  | CSC1=CC=C(OC2CCN(CC3=CC=CC=C3)CC2)C=C1        | 0.290161 | 0.274481 |
| DCZIXOHFCAHNKD   | ClC1=C2SC3=C(CC(N4CCNCC4)C2=CC=C1)C=CC=C:     | 0.266916 | 0.284026 |
| WLBMFXSDDL BRAZ  | CN1CCC(CC1)OC2=CC=C(SC3=CC=CC=C3)C=C2         | 0.274859 | 0.264406 |
| JEXBWN OUCUFHHS  | BrC1=CC2=C(SCC3=C(C=CC=C3)C2C4=NCCN4)C=C:     | 0.281691 | 0.260188 |
| BJZHTQLHPCJNND   | CN1CCN(CCOC2CC3=C(SC4=C2C=C(CI)C=C4)C=CC=     | 0.277337 | 0.265931 |
| FYGXUYJSSXOBBL   | COC1=CC=C(C=C1)N=C(N)SCC2=NC=CC=C2            | 0.240432 | 0.225797 |
| DPBGOHFPUVYOPM   | CN1CCC(CC1)OC2=C(SC3=C(C=CC=C3)C(F)(F)F)C=C   | 0.263932 | 0.253246 |
| LVUDIWHCHFHYEK   | BrC1=CC2=C(SCC3=C(C=CC=C3)C2OC4CN5CCC4C       | 0.287    | 0.2743   |
| RHUQQLBVJSNVLJ   | CC1CC(C)CN(CCOCSC2=CC=CC=C2)C1                | 0.288523 | 0.305026 |
| GYRJRIXBTMXCKY   | CCCCOC1=CC=C(C=C1)C(=O)N\N=C\C2=CC(OC)=C(C    | 0.24434  | 0.225932 |
| YGECTRZNNKKYOAY  | N=C1C=CN(CC(=O)C2=CC=C(C=C2)C3=CC=CC=C3)C     | 0.249493 | 0.22735  |
| VCRYKKJSLYCBHY   | CC1=NN(C(C)=C1SC2=CC=C(C=C2)[N+][[O-]]=O)S(=C | 0.249569 | 0.23347  |
| FNNSJXWEFTXZSZ   | COC1=CC(=CC=C1)N=C(S)N(CCC2=C(C)NC3=C2C=C     | 0.25207  | 0.254383 |
| FVZIWOKPRSIM EC  | COC1=CC(=CC=C1)N=C(S)N(CCC2=C(C)NC3=C2C=C     | 0.241235 | 0.22633  |
| ASNILPDOVJQAO    | FC1=CC=C(C=C1)N2CCN(CC2)C(CNC(=O)OCC3=CC=     | 0.263687 | 0.223543 |
| GIYGBHMNMCHJIT   | CN(C)CCCN(C(=O)CCC1=CC=CC=C1)C2=NC3=C(S2)C    | 0.243178 | 0.223254 |
| GRIXINIGTYIHSN   | ClCC(=O)N(C1=CC=CC=C1)C2=CC=CC=C2             | 0.239837 | 0.229801 |
| OBMKABNHORJNQU   | CSC1=NC2=C(C=CC=C2)C(=N1)N3CCN(CC3)C4=C(C     | 0.238956 | 0.224641 |
| GGDHOWPTGBRPMC   | ClC1=CC=C(C=C1)C2=CSC(=N2)N3CCOCC3            | 0.252233 | 0.255445 |
| XPPTXMKRVXHUMG   | COC1=CC=C(C=C1)C2=NOC(COC3=CC=CC=C3)=C2       | 0.24965  | 0.241469 |
| JCTOPHRZYRAFTP   | ClC1=CC=C(CNC(NC2CCCC2)=NC3=CC=CC=C3)C=       | 0.310109 | 0.274694 |
| AJZXPBSDWPVYBE   | COC1=CC=C(C=C1)N2CCN(CC2)C3=NC4=C(C=CC=C      | 0.251219 | 0.248394 |
| MIYOOJWODFLYKL   | BrC1=CC=C(C=C1)S(=O)(=O)C2=NC3=C(C=CC=C3)N:   | 0.244515 | 0.25154  |
| SKEPZBWZVMRFSJ   | CCN(CC)C1=C(C#N)C(=NC(=N1)C2=NC=CC=C2)C3=(    | 0.273678 | 0.261758 |
| QJRPMZWTWYPYKW   | ClC1=CC2=C(C=C1)C(=CC=N2)N3CCN(CC3)S(=O)(=    | 0.262286 | 0.247335 |
| ILZJYRDFLDSWFU   | CCOC(=O)C2(CCC1=CC=CC=C1)CCN(CC3=C(OC)C=C     | 0.267072 | 0.225252 |
| FTOZHDVIBQNOEF   | CC1=CC(NC2=NC(C)(C)N=C(N)N2)=CC=C1            | 0.313043 | 0.313036 |
| ZNQQBOBENQFAGZ   | CC1=NC(SCC2=NN=C(O2)C3=C(C=CC=C3)[N+][[O-]]:  | 0.23879  | 0.234222 |
| MDMGFFNYPHLZDG   | FC1=CC=C(C=C1)N2CCN(CC2)C(S)=NC(=O)C3=CC=C    | 0.252733 | 0.232192 |
| GPJBSEDRPMPHS    | BrC1=CC=C(C=C1)C2=CN3CCSC3=N2                 | 0.270047 | 0.269575 |
| HHWOVFWQFLUAI    | COC1=C(N=C(N=C1)C2=NC=CC=C2)N(C)C             | 0.243733 | 0.251547 |
| XWXIIFYKAGUANZ   | CCN(CC)CCNCC(O)(C1=CC=C(CI)C=C1)C2=CC=C(CI)   | 0.308828 | 0.307814 |
| AYBYPRNGUZVMQV   | CN1CCN(CC(O)(C2=CC=C(CI)C=C2)C3=CC=C(CI)C=C   | 0.273876 | 0.277202 |
| GAAVXFWCTHXPOI   | NC(=S)N1OC[C@H]2COC3=C([C@H]12)C4=C(C=C       | 0.242142 | 0.240979 |
| UECKKYNEEBRMIL   | OC(CNCC1=CC=C(C=C1)C2=CC=CC=C2)C3=CC(O)=C     | 0.264068 | 0.23066  |
| QUIXMYIKMXDKJF   | CCCCN(CC)CC1=CC=C(CNC(S)=NC2=C(CI)C=C(C)C=C   | 0.255719 | 0.240974 |
| CAMZJWMMMLZD LSE | CCCCN(CC)CC1=CC=C(CNC(=O)NC2=CC=C(CI)C=C2)    | 0.315242 | 0.274555 |
| KUSMJVHRBZPAHQ   | CSC1=CC(=CC=C1)N=C(S)N(CCN(C)C)C(C)C2=NC=CC   | 0.297771 | 0.28478  |
| GKNZLDCSKLKLX    | CN(C)CCNC(=O)C1=CC(=C(SC2=CC=C(Br)C=C2)C=C1   | 0.264189 | 0.227712 |
| IKHJSFHAHLFWOV   | N1N=C(C2=CC=NC=C2)C3=CC=C4C=CC=CC4=C3N=       | 0.251114 | 0.256468 |
| RQZVZXMZBKLHPE   | OCl(=O)(=O)=O.C1=CC=C(C=C1)C2=CC(C3=CC=CC=C   | 0.263497 | 0.285008 |
| XJLAUUGAEXMSTE   | CC1=CC(C)=NC(\N=C(/N)NC2=C(C=CC=C2)C3=CC=C    | 0.2489   | 0.241787 |
| KGIUVVMKTGEIGN   | CN(C)C1=CC=[N+](CC(=O)C2=CC=C(C=C2)C3=CC=CC   | 0.260262 | 0.246816 |
| YWF DALCOUZEVS L | COC1=CC=C(C=C1)C2=[N+](CC3=CC=CC=C3)C4=C(C    | 0.256195 | 0.255945 |
| KTKSHXRVVYJPI    | CC1=CC=C(NC2=NCC(CC3=CC=C(Br)C=C3)S2)C=C1     | 0.307179 | 0.302039 |
| UXKVVUPOXFJTFJ   | COC1=C(C=CC=C1)N2CCN(CC2)C(\S)=N\C3=CC(C)=    | 0.291936 | 0.26786  |

|                 |                                             |          |          |
|-----------------|---------------------------------------------|----------|----------|
| BPKDNYUQUUDNJX  | CC1=CC=C(C=C1)S(=O)(=O)CC(CN2CCCC2)N3CCC(   | 0.274295 | 0.244978 |
| MMPSNKSYGQWBD   | CSC1=CC=C(CN2CCN(CC3=CC=C(C=C3))[N+](O)=O   | 0.286772 | 0.27437  |
| KAIBCOJELXAENF  | CCN(CC)CCNC(=O)C1=C(C)C2=C(N1)C=CC(OCC3=CC  | 0.244651 | 0.22916  |
| BRBRPRUPAFZBRK  | COC1=C(OC)C=C2C(CC3(CCCC3)N=C2SC)=C1        | 0.279439 | 0.245644 |
| AOUWTGIEFIEWFQ  | CCC1C(N(C)C(CC1(O)C2=CC=CC=C2)C3=CC=CC=C3)  | 0.28987  | 0.263592 |
| AYUJSXPEEOWVIP  | COC1=C(CN2CCN(CC3=CC=C(Cl)C=C3)CC2)C=CC=C   | 0.262443 | 0.259336 |
| OAWBNSFACJTGRK  | CC1CN(CCN1)C2=CC(NCCOC3=CC=CC=C3)=C(C=C2    | 0.29042  | 0.25824  |
| NJCPKBULCCSCOS  | CC1=CC(C=C)N2CCN(CC2)C3=CC=CC=C3)=CC=C1     | 0.250023 | 0.242383 |
| HZJFUUXNALQFED  | CN(C)CCCN(C(=O)COC1=CC=C(Cl)C=C1)C2=NC3=C(  | 0.242125 | 0.242744 |
| FYFMMYDSPMPQTP  | CC1=CC=CC(C)=C1\N=C(/S)NCCSC2=CC=C(Cl)C=C2  | 0.270257 | 0.263177 |
| NKWQFTAEPAINSK  | CC(C)CCN(C1CCN(CC1)C(C)C(\S)=N\C2=CC(F)=CC  | 0.26838  | 0.236183 |
| BJOSXOWNVQPBLO  | CN(C)CCOCCOC1=C(C=C(Cl)C=C1)C(C)(C)C        | 0.260209 | 0.234881 |
| UZVYOKPDOYMPGP  | NC(N)=N\N=C\C1=CC=C(OS(=O)(=O)C2=CC=CC=C2)  | 0.248389 | 0.227361 |
| KYQYSANJUCXXCA  | COC1=C(OCC2=CC=C(Cl)C=C2)C=CC(C=C)N(N)N     | 0.279473 | 0.268695 |
| OZISUZNBRLJW    | COC1=CC=C(C=C1)C(=O)C2=C(C=CC(=C2)[N+](O)=  | 0.243982 | 0.251975 |
| UXHDQIRZKBKYO   | FC1=C(Cl)C=C(C=C1)N=C(S)NC2=CC(=NN2)C3=CC=C | 0.245369 | 0.231409 |
| UPXSQTKCJWIRJW  | CC1=C(Cl)C=C(C=C1)N=C(S)N(CCCN2CCCC2)CC3=C  | 0.277865 | 0.263356 |
| MXLFJBAJDFTZCN  | SC(=NC1=CC(Cl)=CC=C1)N(CCCN2CCCC2)CC3=CC=C  | 0.256214 | 0.24587  |
| YWLOVUQANAXWLU  | CC1=CC(=CC=C1)N=C(S)N(CCCN2CCCC2)CC3=CC=C   | 0.265289 | 0.271058 |
| JKUNUPFGZSGECC  | COC1=CC(=CC=C1)N=C(S)N(CCCN2CCCC2)CC3=CC=C  | 0.274749 | 0.262708 |
| BMCGWOGJNBHUIB  | CSC1=CC(=CC=C1)N=C(S)N(CCCN2CCCC2)CC3=CC=C  | 0.259339 | 0.251738 |
| SCAPUKMLNDPVEH  | CC1=CC=C(C=C1)N=C(S)N(CCCN2CCCC2)CC3=CC=C   | 0.297633 | 0.280122 |
| FTODNNJQFPXFFV  | CSC1=CC(=CC=C1)N=C(S)N2CCCN(CC3=CC(Cl)=CC=C | 0.301718 | 0.287258 |
| YSIBDEVVZTYCIB  | COC1=CC=C(C=C1)N=C(S)N2CCCN(CC3=CC(Cl)=CC=C | 0.269014 | 0.243639 |
| PFLGULRHQNYPMN  | CSC1=CC(=CC=C1)N=C(S)N2CCCN(CC3=CC=C(F)C=C  | 0.283816 | 0.251518 |
| CVPTVBGYWXRAP   | COC1=CC(=CC=C1)N=C(S)N2CCCN(CC3=CC=C(F)C=C  | 0.262712 | 0.265507 |
| BNCOSJBYOFDSSY  | CC1=CC(C)=C(C=C1)\N=C(/S)N2CCCN(CC3=CC=C(F) | 0.247881 | 0.228058 |
| RZRDGLIUVFCRMT  | CC1=CC(=CC=C1)N=C(S)NCCN(C2CCCC2)C3CCCCC:   | 0.270818 | 0.239922 |
| LQKHIQAPCZVYRQ  | CC1=C(C)C=C(C=C1)N=C(S)NCCN(C2CCCC2)C3CCC(  | 0.303435 | 0.281904 |
| KUIDKYKLCWSCLF  | C(C1CCC=CC1)N2CCN(CC2)C3CCCCC3              | 0.261824 | 0.229514 |
| HFDQYVFKIRDR    | CC1CN(CC(C)O1)C2=NC=NC3=C2C(=CN3)C4=CC=C(   | 0.240337 | 0.22334  |
| WMKPTGOSRIGQDX  | CCOC(=O)C1=C(C)N(CCC(=O)NC2CCN(CC3=CC=CC=C  | 0.277979 | 0.262764 |
| UEAXCDRBRBTKKU  | CC(N1CCC(CNC(S)=NC2=CC(Cl)=CC=C2)C1)C3=CC=C | 0.310152 | 0.318703 |
| POGXRPWJRVAECM  | CC1=C(C)C=C2C(CC(=O)NC2=C1)C3=C(F)C=CC(Br)= | 0.25696  | 0.224692 |
| PDNZQQNYZWNULD  | CN1CCN(CC1)\N=C\C2=CC=C(O2)C3=C(Cl)C=C(C=C  | 0.243344 | 0.238795 |
| BZKFKMJKMGZZKC  | COC1=C(OCC2=CC=CC=C2)C=C(CNCCC3=CC=C(Cl)C   | 0.246708 | 0.259606 |
| MDFLWFCCFITZCN  | CCC1=CC=C(CN2CCN(CC3=CC=C(SC)C=C3)CC2)C=C   | 0.239952 | 0.233899 |
| GFICLCROZVLVCW  | CCC1=CC=C(C=C1)C2=NN(C=C2)CSC(N)=N)C3=CC=C  | 0.241776 | 0.237277 |
| WYSDYHBYVSQBCE  | CCCCN1C(=N)N(CCOCC2=CC=C(C)C=C2)C3=C1C=CC:  | 0.252407 | 0.226997 |
| GEVANJBQYBIITO  | ClC1=CC=C(CN2CCC(CC2)C(=O)N3CCN(CC3)C(C4=C  | 0.240773 | 0.228704 |
| VTMSWKGMQBMIIO  | CCC(C)NCCOCCOC1=C(C)C=C(Br)C=C1             | 0.279214 | 0.247871 |
| VDTIHKPXBJSNY   | CC(C)C1=C(OCCCN(C)CC2=CC=CC=C2)C=C(C)C=C1   | 0.257489 | 0.24113  |
| YMHIDQHPRVTLET  | CC1CC(C)CN(CCOCC2=C(Cl)C(Cl)=CC=C2)C1       | 0.289051 | 0.265768 |
| ZTLJFBUPZUQPQC  | CC(C)(C)C1=CC=C(OCCCNCC2=CC=CC=C2)C=C1      | 0.267942 | 0.237643 |
| VGOLDQYBUBVZFOS | CCC(C)NCCOCC1=C(Br)C=C(C)C=C1C              | 0.306087 | 0.276455 |
| ZSSRJISHTMTSOJ  | CC1CCCN(CCOCCOC2=C(Cl)C=C(Br)C=C2)C1        | 0.284211 | 0.25793  |
| XXNKKQHOPHTSDT  | CC1CCCN(CCOCC2=C(Br)C=C(Cl)C=C2)C1          | 0.279689 | 0.254649 |
| PSCYBUVYHUPSDO  | CC1CCCN(CCOCCOC2=C(C=CC=C2)C3=CC=CC=C3)C    | 0.294623 | 0.270111 |

|                |                                             |          |          |
|----------------|---------------------------------------------|----------|----------|
| RDCDECHOIHHUNU | CCC(C)NCCCOC1=C(CC=C)C=C(Cl)C=C1            | 0.266973 | 0.227033 |
| SSWTVYLFQUWTFI | CCC(C)NCCOCCOC1=C(C)C(C)=C(Cl)C=C1          | 0.268861 | 0.24365  |
| BCBIOKIGGQEXNQ | CCC(C)NCCCCOC1=C(C)C=C(Cl)C=C1              | 0.295595 | 0.280705 |
| OCLXWBHRPPKPNW | CCC(C)NCCCCOC1=CC(=CC(C)=C1)C(C)C           | 0.267416 | 0.228165 |
| AEWAFEBQAPEWDL | CN(CCCOC1=C(Br)C=C(C)C=C1)CC2=CC=CC=C2      | 0.269297 | 0.236967 |
| FFFYLIDSAKFNSD | CC(C)C1=CC=C(C=C1)\C=N\NC2=NC(=NC(=C2)N3CC  | 0.250712 | 0.226584 |
| LCCTUHKKBTVVSS | CC1CCN(CCCOC2=C(Br)C=C(C)C=C2)CC1           | 0.290084 | 0.29107  |
| JIZJRSNIKWMADT | CCOC1=C(OCC2=CC=C(Cl)C=C2)C=CC(\C=N\N=C(N)  | 0.258974 | 0.252464 |
| MQTHJNMKFYHZQJ | COC1=C(OCCCCN2CCC(C)CC2)C=CC(CC=C)=C1       | 0.258372 | 0.257134 |
| JBOZAMBUQYKIHA | COC1=C(OCC2=CC=CC=C2)C(CNC34CC5CC(CC(C5)    | 0.249752 | 0.227372 |
| YAJVHXYYTXCAO  | CCN(CC)C1=CC=C(CNCCC2=CC=C(F)C=C2)C=C1      | 0.312575 | 0.299334 |
| XIDROJXYFJREQL | CCCCNCC1=CC(OC)=C(OC2CCCC2)C(Br)=C1         | 0.281569 | 0.240341 |
| FMTHLQDBSCILBQ | CC(C)C1CCC(C)CC1OCC(O)CN2CCCC(C)C2          | 0.30052  | 0.2713   |
| NNICULATGKYIKY | OCCN1CCN(CC(O)COC2=CC=C(C=C2)C34CC5CC(CC    | 0.24477  | 0.234799 |
| YVUSAXKSOPPPJJ | CCOC(=O)C1=CC(NC(=O)C2=CC=C(C=C2)N(C)C)=CC= | 0.255709 | 0.250367 |
| FTUASJMDPFCADW | CC1=CC(C)=C(NC(N)=NC2=NC(=CC(C)=N2)N3CCCC   | 0.243061 | 0.228128 |
| QYJSXKKODPSROV | CN1CCN(CC1)C2=C(C=C(C=C2)C(=O)C3=CC=C(Br)C= | 0.264935 | 0.232691 |
| RZHPANYKRJPBKP | CC1=C(CSCCNC(S)=NC2=CC=CC=C2)C=CC=C1        | 0.245776 | 0.234923 |
| FKKFVJQSKCKZDV | SC(NC1CC2CCC(C1)N2CC3=CC=CC=C3)=NC4=CC=C    | 0.288318 | 0.277753 |
| SDGYUCWQEJQFMK | COC1=CC(OC)=C(NC2=NC(=NC(NC3=C(OC)C=C(OC)   | 0.258781 | 0.248614 |
| SENPBBUJCAQOCZ | COCCCNCCCCOC1=C(C=CC=C1)C2=CC=CC=C2         | 0.288337 | 0.266713 |
| GCRAXYJYGWUDKD | CC(C)NCCCCOC1=CC(=CC(C)=C1)C(C)C            | 0.253494 | 0.228483 |
| NIRXFWNBVKSCOD | ClC1=C(Cl)C=C(OCCCN2CCCC2)C=C1              | 0.293234 | 0.263165 |
| KEDCFLQUPOQSMN | [O-][N+](=O)C1=C(NC2CC2)C=C(C=C1)N3CCCC3    | 0.269224 | 0.234187 |
| UZZSBHPQFNQHIB | SC(NCC1=C(Cl)C=C(Cl)C=C1)=NC2=CC=CC=C2      | 0.246935 | 0.234499 |
| OXHLKKWMHZCRJW | CN1CCN(CC1)C2=C(C=C(F)C(=C2)N3CCCCC3)[N+]   | 0.314115 | 0.297859 |
| NQJZRCYVUAQNMJ | CSC1=C(C=CC=C1)C(=O)N2CCN(CC2)C3=CC(Cl)=CC= | 0.262496 | 0.254547 |
| UXHDUFIOVXVIJL | CC1CCCN(CCCOC2=C(Cl)C=C(Br)C=C2)C1          | 0.289427 | 0.266875 |
| AIMUFYVOHLVFCJ | CC1CCCN(CCOC2=C(Br)C3=C(C=CC=C3)C=C2)C1     | 0.246445 | 0.233804 |
| ZRNCPTILWBFYFU | COC1=C(OCCCN2CC(C)CC(C)C2)C=CC(CC=C)=C1     | 0.241081 | 0.235488 |
| FERNBCFSUGMRRK | CC1CCCN(CCOCCOC2=C(Br)C=C(C)C=C2Cl)C1       | 0.274565 | 0.263583 |
| DXLYNCCYRVAILX | CCC(C)NCCOCCOC1=CC(C)=C(Cl)C(C)=C1          | 0.25958  | 0.243842 |
| SFDHNSVBQLVGV  | CN(C)CCCCOC1=C(Cl)C=C(Br)C=C1               | 0.299419 | 0.291009 |
| FSQNAVGZOIOEFD | CN(C)CCOCCOC1=C2C=CC=CC2=C(Cl)C=C1          | 0.2702   | 0.27816  |
| NDESNAGGEMBXFS | CC1CCCN(CCCOC2=C(C=C(C)C=C2)[N+](O)C1       | 0.259129 | 0.243587 |
| SFMLQAVQSGBTMM | CC1CC(C)CN(CCOCCSC2=CC=C(Cl)C=C2)C1         | 0.310249 | 0.30551  |
| DJZUMTSRGAGZJZ | CC1CCCN(CCCOC2=C(C=CC=C2)C3=CC=CC=C3)C1     | 0.287789 | 0.283609 |
| RMJFYGBCYRSVGX | CCC(C)NCCOC1=C(C=CC=C1)C2=CC=CC=C2          | 0.262095 | 0.242653 |
| XCHSDYOLWFHBLV | CN(C)CCOCCOC1=C(CC=C)C=C(Cl)C=C1            | 0.254642 | 0.257398 |
| XJPDYOUONEOAM  | COC1=C(OCCCN2CC(C)CC(C)C2)C=CC(\C=C\C)=C1   | 0.263305 | 0.252305 |
| YFJPAZGBYRDQGG | CN(C)CCOCCOC1=C(Br)C=C(Cl)C=C1              | 0.269487 | 0.267639 |
| FHEMKPMORHQQQS | CCC(C)NCCOCCOC1=C(Br)C=C(Cl)C=C1            | 0.239061 | 0.230399 |
| ZQEXXTHWIUDAAP | CN(CCCOC1=C(Cl)C=CC(C)=C1)CC2=CC=CC=C2      | 0.264787 | 0.276318 |
| HMTNZOGZNYHIEQ | CC1CC(C)CN(CCCNC(=O)C2=CC3=C(N2C)C4=C(NC3   | 0.242299 | 0.232016 |
| VEULKRYMXABOMR | FC1=CC(=CC=C1)C(=O)NC2=NN(CC3=CC=CC=C3)C=   | 0.261788 | 0.250131 |
| OLFLPZGIJLSZFG | NC1=NC(NC2=CC=C(Cl)C=C2)=NC(CN3CCN(CC3)C4   | 0.248582 | 0.223963 |
| ISWRJPQPLRUCHM | CCOC1=CC=C(NC2=NC(CN3CCN(CC3)C4=C(F)C=CC=   | 0.259823 | 0.222612 |
| IJMNDTSCUAZHRX | CC1=CC(Br)=C(NC(=O)NC2=CC=C(Cl)C=C2)C=C1    | 0.239674 | 0.254674 |

|                 |                                              |          |          |
|-----------------|----------------------------------------------|----------|----------|
| GVZFKHPHBTYJJ   | CC(C)C1=CC=C(C=C1)C(=O)NCCCN2CCN(CCCNC(=O    | 0.279832 | 0.249779 |
| QCHPJBPMPZWYTRW | BrC1=C(OCCCCN2C=NC3=C2C=CC=C3)C=CC=C1        | 0.24023  | 0.224594 |
| XPBPUSHVNFQNMN  | COC1=C(OC)C(OC)=C(CN2CCN(CC2)C(=O)C3=C4C=C   | 0.281435 | 0.263733 |
| KVGWUIURYEHAX   | FC1=CC=C(COC2=C(CNCC3CCCO3)C=C(Br)C=C2)C=    | 0.252469 | 0.231549 |
| JUUPROSNCWGZHL  | CCN(CC)C1=CC=C(CNCCC2=C(F)C=CC=C2)C=C1       | 0.280332 | 0.261686 |
| DKOLTNOMOCFJKI  | C(COC1=C(C=CC=C1)C2=CC=CC=C2)OCCN3CCC4=C     | 0.283539 | 0.288377 |
| JFVXGMCWCRFNIA  | CC1CCCC(NCCCCOC2=C(C)C=C(C)C=C2)C1C          | 0.268055 | 0.247814 |
| RNXXMVAWNIQIAY  | ClC1=CC=C(SCCOCCN2CCC3=C(C2)C=CC=C3)C=C1     | 0.252131 | 0.260133 |
| YQLVICLGJVP GCZ | CNCCCO1=CC(OC2=CC=CC=C2)=CC=C1               | 0.239548 | 0.26342  |
| VFEHOEAMKLDHI   | CNCCCO1=C(C)C(C)=CC(C)=C1                    | 0.286983 | 0.277352 |
| MYMDEOZVGRYQND  | C(CNC1CCCC1)COC2=CC=C(C=C2)C3=CC=CC=C3       | 0.257826 | 0.23473  |
| YXPAJJOQUGLWAW  | CC(C)C1=CC=C(OCCCN2CCCC2)C=C1                | 0.289971 | 0.289828 |
| GJUQNXFCNZTWKL  | O=S(=O)(CC(CN1CCCC1)N2CCCC2)C3=CC4=C(C=C     | 0.260979 | 0.252264 |
| AJOSLCKWHYXIGZ  | COC1=C(OC)C=C(NC(=O)N2CCN(CC2)C3=CC=C(C=C    | 0.267161 | 0.256293 |
| LGFBWSZKHBLEG   | FC1=CC(F)=C(C=C1)\N=C(S)N2CCN(C\C=C\C3=CC=   | 0.244442 | 0.228391 |
| UWHKGMMAZFDNPR  | [O-][N+](=O)C1=CC=C(C=C1)S(=O)(=O)CC(CN2CCCC | 0.243772 | 0.238481 |
| GRSGNBWLJCPRMF  | C(COC1=C(C=CC=C1)C2=CC=CC=C2)CN3CCCC3        | 0.292605 | 0.301258 |
| LIVWJOWBAOASLL  | COC1=C(OCCCN2CCN(CC2)C(C3=CC=CC=C3)C4=C      | 0.278028 | 0.268791 |
| WBHITXUPZPJNFQ  | C(COC1=C(C=CC=C1)C2=CC=CC=C2)CN3CCCC3        | 0.319771 | 0.281161 |
| AZGMNIZEDJYOTG  | COCCCNCCCCSC1=CC=C(Cl)C=C1                   | 0.281148 | 0.267614 |
| ZPRZGEJEFRDCKP  | CN1CCN(CCCCO2=C(C=CC=C2)C3=CC=CC=C3)CC1      | 0.25213  | 0.275875 |
| VKEYFEWCJZVRR   | CC1CCN(CCCCO2=C(C)C=C(Br)C=C2)CC1            | 0.303653 | 0.279976 |
| SUNKWBDBFBWFSC  | ClC1=CC(Br)=C(OCCCN2CCCC2)C=C1               | 0.27154  | 0.26377  |
| PXOSRXIRTZFHEM  | C(CCN1CCCC1)COC2=CC=C(OCC3=CC=CC=C3)C=C2     | 0.251254 | 0.259188 |
| FKJMV DLMELUKBZ | CC1CCN(CCO2=CC=C(OCC3=CC=CC=C3)C=C2)CC1      | 0.283294 | 0.255162 |
| JTYGCCQWYOUAE   | CC1=C(OCCCN2CCCC2)C=CC(Br)=C1                | 0.28034  | 0.2539   |
| MRZZAIYUACOFLA  | CC1CCN(CCCCO2=C(C=CC=C2)C3=CC=CC=C3)CC1      | 0.289411 | 0.275886 |
| CVVWFILCNQEOER  | CC1CCN(CCOCCOC2=C(C=CC=C2)C3=CC=CC=C3)C      | 0.29845  | 0.290438 |
| DKDIUWSBBSRHRQ  | COCCCNCCCCOC1=C(C)C=C(Br)C=C1                | 0.30462  | 0.273488 |
| XSWNRULUPLYDX   | COCCCNCCOC1=CC=C(C=C1)C(C)C2=CC=CC=C2        | 0.282331 | 0.255119 |
| YCEKXMFYKWKGW   | C(COC1=CC=C(OCC2=CC=CC=C2)C=C1)CN3CCCC3      | 0.265854 | 0.268415 |
| GQFUPFFSXYFHP   | CC1=C(C=C(Cl)C=C1)N2CCN(CC2)C(\S)=N\CC3=CC=  | 0.243689 | 0.228385 |
| UWHNHEHALYKFPX  | COCCCNCCOCCOC1=C(C=C(Cl)C=C1)C(C)C           | 0.249457 | 0.234186 |
| HPECOWXNRPSDOW  | COCCCNCCCCOC1=C(C=C(Cl)C=C1)C(C)C            | 0.264703 | 0.273275 |
| IQVIKDPDRJNOIH  | CCCCNCCOCCOC1=C(Br)C=C(Cl)C=C1               | 0.272648 | 0.240176 |
| VQTJEOYKUQLCLX  | COCCCNCCCCOC1=C(Cl)C=C(Br)C=C1               | 0.292792 | 0.262647 |
| YHGWRZQMLHASHX  | CC1CCN(CCOCCSC2=CC=C(Cl)C=C2)CC1             | 0.299409 | 0.287499 |
| RNV DZTFWEXPPCU | CC(C)NCCCO1=C(CC=C)C=C(Cl)C=C1               | 0.248372 | 0.232933 |
| BBUWRFSVSNYDB   | C(CN1CCCC1)OC2=CC=C(OCC3=CC=CC=C3)C=C2       | 0.26432  | 0.249781 |
| SHFSYRGBXUYCKE  | C(CCN1CCCC1)COC2=C(C=CC=C2)C3=CC=CC=C3       | 0.287195 | 0.266463 |
| GQYQARJPAMYJJ   | COCCNCCCCOC1=C(C)C=C(Br)C=C1                 | 0.265047 | 0.238236 |
| FQFVOMNQSZAVLR  | COCCCNCCOCCSC1=CC=C(Cl)C=C1                  | 0.268521 | 0.27148  |
| LXYASAOAWTZRBQ  | COCCCNCCCCOC1=CC=C(C=C1)C(C)C2=CC=CC=C2      | 0.250181 | 0.240685 |
| PGDQVXNYFYSOFA  | CC1=CC(OCCCN2CCCC2)=C(C=C1)C(C)C             | 0.247002 | 0.233335 |
| WFTUOFGLKWFNW   | C(CN1CCCC1)OC2=CC=C(OCC3=CC=CC=C3)C=C2       | 0.255922 | 0.241962 |
| KRTDFHGFQAZYDV  | COC1=C(OCC2=C(Cl)C=CC=C2)C=CC(\C=N\O)=C1     | 0.24406  | 0.231238 |
| FPUGRWXWXIKFML  | COC(=O)C1=C(NC(S)=NN2CCN(C)CC2)SC3=C1CCC(C   | 0.250021 | 0.22973  |
| PQLCXUPBVIKFFG  | FC1=CC(Cl)=C(CN2CCN(CC2)C(\S)=N\CCC3=CC=CC=  | 0.260144 | 0.254048 |

|                 |                                               |          |          |
|-----------------|-----------------------------------------------|----------|----------|
| JWEFANVNEHLLDH  | CC1=C(C=CC=C1Cl)\N=C(/S)NCC2=C(Cl)C=CC=C2     | 0.27421  | 0.25685  |
| HAGMIUXRVWGUFA  | CC(C)CN(CC(C)C)CC(O)COC1=C(Br)C=CC=C1         | 0.280409 | 0.234662 |
| SXABAObUANMHV   | [O-][N+](=O)C1=C(C=C(C=C1)N2CCNCC2)N3CCCCC1   | 0.276368 | 0.252458 |
| ZOFUEPAECUOZJV  | COC1=C(OCCN2CCC(CC3=CC=CC=C3)CC2)C=CC(=C      | 0.249796 | 0.249778 |
| VIGCGDJDZNXXPV  | COC1=CC=CC(OC)=C1OCCCN2CCC(CC3=CC=CC=C        | 0.306588 | 0.293636 |
| LPVWEORWKBYMBI  | CC1(C)COC(\C=C\C2=CC=C(C=C2)[N+](O)=O)=N1     | 0.253011 | 0.238994 |
| OQVAJQUCTXKXMW  | COC1=C(OC2CCCC2)C=C(Br)C(CNC3CCCC3)=C1        | 0.299756 | 0.264901 |
| WXTWEJNFZDBKHN  | CCN1CCN(CCCOC2=C(Br)C=C(Cl)C=C2)CC1           | 0.312912 | 0.308787 |
| QXCLZDQCQVDKAR  | CCN1CCN(CCOC2=C(Cl)C(Cl)=CC=C2)CC1            | 0.28001  | 0.281582 |
| BEJVCYTZJSCWPG  | CSC1=CC(=CC=C1)N2CCN(CCCNC(S)=NC3=CC=C(F)C    | 0.304939 | 0.272583 |
| GOKKDJRZUCAPLS  | CCOC(=O)C1=CC=C(NC(=O)COC2=C(OC)C=C(CNC3C     | 0.261515 | 0.225615 |
| VBTJJBPDUUBLAN  | ClC1=CC(=CC=C1)C2=NC3=C(C=CC=C3)C(NCCCN4C     | 0.245956 | 0.223726 |
| KGWDIYMLQDNMQP  | [O-][N+](=O)C1=NN(C2=CC=CC=C2)[N+](O)=C1NC    | 0.253968 | 0.25453  |
| ZXKOMYIPTDBCFK  | COC1=C(OC)C=C(C=C1)C2=CSC(=N2)N3CCN(CC3)C     | 0.258838 | 0.263783 |
| FXBLCNQDCJPYSD  | CC1=CC(OCCN2CCC(CC3=CC=CC=C3)CC2)=C(C=C1      | 0.248075 | 0.248504 |
| PSLFLFQJOCYNET  | CCOC(=O)C1=CC=C(NC(=O)COC2=C(CNC3CCCC3)C      | 0.258681 | 0.229007 |
| FBTMLLNWEFZLSO  | CC1=C(NC(=O)C2=CC=C(CN3CCOCC3)C=C2)C=CC(C     | 0.24567  | 0.225868 |
| ORZXAVVYGYBRFH  | CCOC1=C(OCC2=CC=C(C)C=C2)C=CC(\C=N\O)=C1      | 0.243047 | 0.230162 |
| CGEQTVNVVCKVDH  | CCOC(=O)C1=C(NC(=O)CCN2CCOCC2)SC(C)=C1C3=     | 0.240918 | 0.229164 |
| GWGXKLPOBVUBID  | COC1=CC=C(C=C1)N2N=CC3=C2N=CN=C3N4CCN(C       | 0.251578 | 0.242526 |
| REDCWBMFJVHFM   | COC1=C(C=CC=C1)N2CCN(CC2)C(\S)=N\C3=CC=C(C    | 0.250757 | 0.230206 |
| QYBAPVCAKUOYGY  | CCN(CC1=CC=CC=C1)C2CCN(CC3=CC=C(SC)C=C3)C     | 0.248344 | 0.233515 |
| YHLDLUMVWQSJHW  | CN(C)C1=CC=C(C=C1)C(\S)=N\C2=CC=CC=C2         | 0.269719 | 0.285022 |
| XFKBVJQHHPASKP  | C(NC12CC3CC(CC(C3)C1)C2)C4=C(OCC5=CC=CC=C     | 0.273062 | 0.260994 |
| ASYZTKCDBLULEQ  | CCOC1=CC=C(OCC2=CC(=CC=C2)C(=O)N(CC)CC)C=C    | 0.251408 | 0.24072  |
| GRRZJWOHVXGXDO  | COC1=C(OC)C(OC)=C(CN2CCN(CCCOC3=CC=C(Cl)C     | 0.280721 | 0.274779 |
| HEOAYOJFWWSGBM  | C(COC1=C(C=CC=C1)C2=CC=CC=C2)CN3CCCCC3        | 0.24312  | 0.264845 |
| GOCMETWPMPECCN  | C(CCN1CCCCC1)COC2=C(C=CC=C2)C3=CC=CC=C3       | 0.257208 | 0.274502 |
| IVLBYNZHIIIHOH  | BrC1=C(OCCCN2CCCCC2)C=CC=C1                   | 0.287149 | 0.277064 |
| QESYMHDXPQJEHR  | CC1=CC(C)=C(OCCCN2CCCCC2)C=C1                 | 0.274998 | 0.277677 |
| YHUXMSLWZYFUGT  | BrC1=CC(OCCCN2CCCCC2)=CC=C1                   | 0.278371 | 0.288886 |
| WIWWIBIRURAGMD  | CC(C)(C1=CC=CC=C1)C2=CC=C(OCCCN3CCNCC3)C      | 0.255968 | 0.241522 |
| FDGXABIAEZTJCM  | CN1CCN(CCCOC2=C(C(=O)C=CC=C2)CC1              | 0.254354 | 0.236972 |
| PXUMPNLLASGJTF  | CN1CCN(CC1)C2=CC=C(NC(=O)C3=CC=C(O3)C4=CC     | 0.256301 | 0.237967 |
| BDHYQZLCEYRYHZ  | SC(NCC1=CC=C(Cl)C=C1)=NC2CCN(CC3=CC=CC=C3     | 0.309635 | 0.302226 |
| LAMJXNKMRSGCNB  | SC(NC1CCN(CC2=CC=CC=C2)CC1)=NC3=C(Cl)C=C(B    | 0.266653 | 0.277495 |
| UWONKTWTNIYPQE  | CC1=NN(C2=C1C(C)=C(CCC(=O)NC3=CC=C(CN4CCC     | 0.247465 | 0.22406  |
| JXONPPKRYJENMO  | [O-][N+](=O)C1=CC=C(NC(=O)NC2=C(F)C=C(Cl)C=C2 | 0.243554 | 0.267384 |
| FGBRKEJLQWBLOX  | CC1=C(OCC(O)CN2C(=N)N(CC3=CC=CC=C3)C4=C2C     | 0.255959 | 0.232625 |
| UMGOIUGWGIDDRY  | CCCN1CCN(CC1)C2=NC=NC3=C2C(=CS3)C4COC5=       | 0.247438 | 0.228813 |
| RZMBLYFTQCGNPA  | FC1=C(COC2=C(CNCC3=CN=CC=C3)C=C(Br)C=C2)C     | 0.243795 | 0.232864 |
| YFMJHHNGMFMMOI  | CCOC1=C(OCC2=CC=CC=C2)C(Br)=CC(CNCCO)=C1      | 0.305343 | 0.278431 |
| SNQXWEDASGPDRO  | COC1=C(OC2CCCC2)C=C(Br)C(CNCC3=CC=CC=C3)=     | 0.24946  | 0.227139 |
| SESBBJCQFFBCAQ  | CCN1CCN(CCCOC2=C(C=CC=C2)C3=CC=CC=C3)CC1      | 0.293022 | 0.345001 |
| IDNLDKVZUUKPKO  | [O-][N+](=O)C1=C2N=CC=C(N3CCCC3)C2=CC=C1      | 0.304587 | 0.271771 |
| WUXPIHKVMXGSCO  | CNCC1=C2C=CC=CC2=CC=C1OCC3=C(F)C=CC=C3        | 0.307403 | 0.314703 |
| CNXCLIWQKBUJL   | CC1CCN(CC1)C(C2=C(NC(=O)C3=CC=CO3)SC(C)=C2    | 0.243639 | 0.247278 |
| SGMXFQFNCTRIYGN | OC(CON=C1C2=C(C=CC=C2)C3=C1C=CC=C3)CN4CC      | 0.246131 | 0.237344 |

|                 |                                              |          |          |
|-----------------|----------------------------------------------|----------|----------|
| DARZMOVEAYAQSU  | CN1N=CC2=C1N=CN=C2N3CCN(CC3)C4=CC(Cl)=C      | 0.25375  | 0.246013 |
| MDANCUAEFSMZMJ  | S=C1SCN(CC2=CN=CC=C2)CN1CC3=CC=CC=C3         | 0.280685 | 0.266313 |
| BULMODKVYZUWGQ  | CN1CCN(CC1)C2=NC=NC3=C2C(=CN3C4=CC=C(F)C     | 0.278904 | 0.270623 |
| KIQMPLDUQLNUGR  | CC1CCN(CCCN2C(=O)C3=C(C=CC=C3)N=C2SCC(=O)    | 0.283203 | 0.272499 |
| ZXRLMFHUUUIQRE  | [O-][N+](=O)C1=CC=C(C=C1)S(=O)(=O)CC(CN2CCOC | 0.255581 | 0.273682 |
| JLIOYJUFXPJOPJ  | CCOC1=CC=C(C=C1)C(C)\N=C(/S)NCC2=CC=C(Cl)C=  | 0.239325 | 0.241323 |
| IHTNUABIDOQQHY  | CC1=NN(C(NC2=C(Cl)N=C3C=CC=CC3=N2)=C1)C4=    | 0.278906 | 0.279603 |
| CRXCHEDZFDDCMS  | COC1=C(OC)C=C(NP(=O)(OC2=CC=C(Cl)C=C2)OC3=   | 0.254441 | 0.231137 |
| GXADDOMJEKODJM  | COC1=CC(NP(=O)(OC2=CC=C(Cl)C=C2)OC3=CC=C(C   | 0.269779 | 0.251623 |
| PUMKUBDFETUMHR  | COC1=NC(=NC(NC2CCCCC2)=N1)N3CCCCC3           | 0.261627 | 0.233131 |
| KYXFQLGXQKEFTL  | CN(C)C1=CC=C(CNC2C3CC4CC(C3)CC2C4)C=C1       | 0.286285 | 0.227154 |
| UBKHTBJCEMMIX   | COC1=C(OCCCCN2CC(C)OC(C)C2)C=CC(CC=C)=C1     | 0.252836 | 0.229731 |
| VSUZUIHQHXKTNZ  | CN(C)CCOC1=CC=C(C=C1)C(C)(C)C2=CC=CC=C2      | 0.26092  | 0.269817 |
| NKFFSZDJFBWGNX  | CCC(C)NCCCOC1=C(Cl)C=CC(Cl)=C1               | 0.269631 | 0.239411 |
| OJXUTEQKYARIAE  | CC1CC(C)CN(CCOC2=C(Cl)C=C(Cl)C=C2)C1         | 0.296377 | 0.272046 |
| WXIZYRMWFYFBOF  | COC1=CC=C(CN2CCN(CC(O)CN3C4=C(C=CC=C4)C5     | 0.267142 | 0.233093 |
| HTESIOSNBHFBPG  | ClC1=CC(OCCN2CCN(CCOC3=CC(Cl)=CC=C3)CC2)=    | 0.312233 | 0.306687 |
| CCBNQKADENDQLT  | COC1=CC(=CC(OC)=C1)C(=O)NC2=NC(=C(O2)C3=CC   | 0.243914 | 0.246207 |
| JDWQBGIYOHYBSR  | CC1=CC=C(C=C1)C2=NNC=C2\C=N\N3C(=O)C4=C(C    | 0.244381 | 0.237106 |
| AQRXEBHCTMZRIO  | CCCCCCCC[N+](C)(C)CC#C                       | 0.287953 | 0.244199 |
| QFOMORMHDMJFDX  | CSC1=NC(N(C)C)=C(CC2=CC=C(OC(C)C)C=C2)C(Cl)= | 0.250421 | 0.248477 |
| KIYSHYZINRZPMH  | CN1CCN(CC1)\N=C\C2=CC(Cl)=C(Cl)C=C2          | 0.276025 | 0.269605 |
| QSHVRKJQAHHUCK  | CN1C=NC(=C1OC2=CC3=C(C=CC=C3)C=C2)[N+](O-    | 0.242453 | 0.236611 |
| TWMNSQGYKDIDRO  | CC1=NC(NCC2=CC=CC=C2)=NC(N\N=C\C3=CC=CC=     | 0.241967 | 0.234717 |
| UOIUXZCCHBUOLE  | CCN1CCC(CC1)C2=NC(=CS2)C3=CC(Br)=CC=C3       | 0.300804 | 0.305275 |
| WDPCUABBFTUIEB  | CCCCOP(=O)(C(NC1=CC=CC=C1)C2=CC=CC=C2)C3=    | 0.256409 | 0.267365 |
| KSJMFXRFOAAIJ   | ClC1=CC=C(C=C1)C2=CC=C(O2)C(=O)NC3=C(C=CC=   | 0.241076 | 0.233036 |
| FFIIZXTWAHLAAR  | CN1CCN(CC1)C(=S)SCC(=O)NC2=C(C=C(Cl)C=C2)C(= | 0.246141 | 0.231761 |
| RMGDBFVOOAVQD   | COC1=CC=C(C=C1)C2CC(=NN2C(=O)C3=CN=CC=C3     | 0.246916 | 0.235763 |
| LUMFRFYQKACABY  | COC1=CC=C(C=C1)[N+]2=C3SCCN3C(=C2)C4=CC=C    | 0.274562 | 0.246439 |
| APZKSDJWVXIYBG  | CC1=CC=CC2=NC(CSC(N)=N)=C(Br)N12             | 0.241004 | 0.223738 |
| JTPOILAPENLVRK  | COC1=CC=C(C=C1)C2=C[N+](=C3SCCN23)C4=CC=C    | 0.255911 | 0.229592 |
| HAYUDLNFDROBAK  | COC1=C(C=CC=C1)C(=O)N2C3=C(SC4=C2C=CC=C4)    | 0.241875 | 0.227876 |
| RQWPMCHDZCMYDY  | COC1=CC=C(C=C1)C2=CN3CCCCC3=[N+]2C4=CC=      | 0.256581 | 0.241486 |
| VJBSUZOYIXRIG   | CCOC1=CC=C(C=C1)[N+]2=C3CCCCCN3C=C2C4=CC     | 0.265072 | 0.251878 |
| RYGOLMQJSCPBKD  | CCOC1=CC=C(C=C1)C2=CN3CCCCC3=[N+]2C4=CC      | 0.311433 | 0.309765 |
| NLKQOQPQCOLHSP  | COC1=CC=C(CN2C(=C[N+]3=C2C=CC=C3)C4=CC=C(    | 0.283579 | 0.248736 |
| IVCMVLQWGVGYGX  | COC1=CC=C(CN2C(=C[N+]3=C2C=CC=C3)C4=CC=C(    | 0.240943 | 0.224559 |
| FJGJMPKHRVYXRC  | CCOC1=CC=C(CC2=C(N=C(SC)N=C2Cl)N(C)C)C=C1    | 0.243981 | 0.241016 |
| RNTOYPHAKLFIHA  | CCOC1=C(CSC(N)=N)C=C(Br)C=C1                 | 0.250913 | 0.281559 |
| AOFTWMZIZMOCQH  | CCCCOC1=C(CSC(N)=N)C=C(Br)C=C1               | 0.259564 | 0.244658 |
| BBKCBPMHPQHHEM  | CCOC(=O)C1(CCN(CC(=O)NC2=C3C=CC=CC3=CC=C     | 0.249615 | 0.243584 |
| MGLURDBJAAAYHC  | CCN1CCN(CC1)C2=C(C=C(F)C(=C2)N3CCCC3)[N+](F  | 0.309815 | 0.285525 |
| HIRFJJHUBGHUDC  | CN1CCN(CC1)C2=C(C=C(F)C(=C2)N3CCC4=C(C3)C=   | 0.320135 | 0.292647 |
| VMOSPCSOWBEFCJ  | COC1=CC=C(C=C1)C(=O)O[C@H](C2CC3CCN2CC3C     | 0.259909 | 0.247125 |
| AZIQVQCACXYRFM  | COC1=CC=C(C=C1)C(=O)ON2C(=O)C3=C(C=CC=C3)N   | 0.248724 | 0.254929 |
| PMAPSVKQSNRJJJO | CN(C)C1=CC=C(\C=N\NC(=O)C2=C(Cl)C=CC=C2)C=C  | 0.241303 | 0.242734 |
| IOXREBLQQCZGU   | COC1=CC(=CC=C1)N=C(S)N(CCCN2CCOCC2)CC3=C     | 0.246702 | 0.246285 |

|                 |                                               |          |          |
|-----------------|-----------------------------------------------|----------|----------|
| PBXSCDGXPXQLPX  | COC1=CC=C(C=C1)N=C(S)N(CCCN2CCOCC2)CC3=Cl     | 0.242174 | 0.237429 |
| JZWQVKCQOJKTEF  | CN1C=C(CN(CCCN2CCOCC2)C(\S)=N\C3=CC(Cl)=CC    | 0.273638 | 0.241543 |
| LRSFFDRYGFKPIL  | COC1=C(OCC2=CC=C(Cl)C=C2)C=CC(CNCC3=NC=CC     | 0.250802 | 0.239049 |
| FGXORRWATASCLIV | CCN1CCN(CC1)C(\S)=N\C2=CC3=C(C=C2)N=C(C=C3    | 0.275326 | 0.249005 |
| ULVCFGLOBJJNMH  | FC1=CC=C(COC2=C(CNCC3=CC=NC=C3)C=C(Br)C=C     | 0.260672 | 0.223059 |
| AKKNPBZYGQDLY   | COC1=C(OC)C=C(CNCCC(C(C)C)C2=CC=C(OC(C)C)C=   | 0.329125 | 0.302934 |
| GYJOCYVSODNABJ  | COC(=O)C1=C(C=C(OC)C(OC)=C1)\N=C(/S)N2CCN(C   | 0.268947 | 0.240424 |
| JDHQMNQTFMMAOM  | CCN1CCN(CC1)C(=O)C2=CC=C(CSC3=CC=C(C)C=C3     | 0.291987 | 0.26379  |
| JHUZXKHQDVCOQQ  | COC1=CC=C(NS(=O)(=O)C2=CC(N(C)S(=O)(=O)C3=CC  | 0.24814  | 0.236764 |
| VUBFUAHKEBCMTF  | OC(C1CCN(CC(=O)NC2=CC=CC=C2)CC1)(C3=CC=CC     | 0.289131 | 0.239741 |
| UUVNYPCBBXOBP   | CCC(=O)NC(S)=NC1=C(N2CCCC2)C(Cl)=CC=C1        | 0.246681 | 0.230184 |
| VILROXNCRXPOMD  | CCOC(=O)N1CCN(CC1)C2=C(C=C(F)C(=C2)N3CCN(     | 0.293572 | 0.269898 |
| PKSMIXVRARBJHK  | COC1=C(OCC2=C(Cl)C=CC=C2)C(Cl)=CC(CNC3CCCC    | 0.311122 | 0.262724 |
| QWZQCJLVBHCNJU  | SC(=NC1CCCC1)N2CCN(CC(=O)NC3=CC=C(OC4=CC      | 0.241204 | 0.23057  |
| APLGOPMDXTVZMI  | COCCC\N=C(/S)N1CCN(CC1)C2=CC=C(C=C2)[N+](C    | 0.24403  | 0.228351 |
| IHLQVRGYCNKFET  | CCC(C)C1=CC=C(C=C1)N=C(S)NC2CCN(CC3=CC=CC     | 0.263159 | 0.249581 |
| LFRDEVWAMJRBPU  | FC(F)(F)C1=CC(=CC=C1)N=C(S)N2CCN(CC2)C3=CC(=  | 0.273375 | 0.256044 |
| FTJTUQRVWVOUOA  | COC1=C(OCC2=C(Cl)C=CC=C2)C(Br)=CC(CNCCO)=C    | 0.267821 | 0.234578 |
| PNTVSUDFVUTGCM  | CC1=C(NC(=O)CN2CCC(CC2)C(O)(C3=CC=CC=C3)C4    | 0.262191 | 0.231028 |
| IRZCIGMOYMHWKF  | COC1=CC=C(C=C1)C2=NN(C(C2)C3=CC=C(C=C3)N(C    | 0.265347 | 0.305934 |
| FXVGRPNJSDXZBY  | COC1=CC=C(NC(S)=NC2=CC=C(OC3=CC=CC=C3)C=C     | 0.259271 | 0.269469 |
| LPGWRSRDJVSZKN  | CCCCNCC1=CC(OC)=C(OCC2=CC=CS2)C(Br)=C1        | 0.309526 | 0.243135 |
| YHZWZMLROKXOTC  | CN1CCN(CC1)C(=O)C2=CC=C(CSC3=CC=C(Cl)C=C3)    | 0.262886 | 0.25615  |
| OXBGNWDZXDFSIY  | CCOC1=C(OCC2=CC=CC=C2)C(Cl)=CC(CNC3CCCC3)     | 0.290736 | 0.288666 |
| GFLZAPCJCWPPDY  | COC1=C(OCC2=CC=C(F)C=C2)C(Cl)=CC(CNC3CCCC3    | 0.307247 | 0.306424 |
| RRSLQLMRWNJBR   | ClC1=CC(NC(=O)C2C3CCC4C(CCC23)C4(Cl)Cl)=CC=   | 0.248728 | 0.23168  |
| ZNYSNAVINDASLY  | BrC1=C(NC(=O)C2=C(C=CC=C2)C3=CC=CC=C3)C=CC    | 0.245358 | 0.235187 |
| NMILQIXJUCLYPM  | ClC1=CC=C(SCC(=O)NC2=C(C=CC=C2)N3CCN(CC3)C    | 0.240815 | 0.250899 |
| OPFYPRZIJSHSD   | ClC1=CC(Cl)=C(OCCOCCN2CCC3=C(C2)C=CC=C3)C=    | 0.240304 | 0.245768 |
| HHIZRUCKMDETPC  | COC1=C(C=C(C=C1)S(=O)(=O)N2CCCCC2)N(C)S(=O    | 0.254042 | 0.236371 |
| MZQGFOWHHQGHQE  | CCN1CCN(CC1)C2=C(C=C(F)C(=C2)N3CCC4=C(C3)C    | 0.270726 | 0.249015 |
| MFJHMTFOCRVPES  | CC(C)C1CC(CCNCC2=CC=C(C=C2)N(C)C)(CCO1)C3=    | 0.26237  | 0.243453 |
| JIWPBHDLXKHUIY  | O=C(N1N=C(CC1C2=CC=CC=C2)C3=CC=CC=C3)C4=      | 0.238729 | 0.26335  |
| CBZLKDOSMRWOF   | CC(N(C)C)C1=C(C=CC=C1)C(O)(C2=CC=CC=C2)C3=C   | 0.301328 | 0.285554 |
| FGJSCJRVOKNQRT  | COC1=C(OC)C=C(C=C1)C(=O)ON=C(N)CC2=CC=C(Cl)   | 0.24087  | 0.24142  |
| HTWRVXQXRQFGJO  | ClC1=CC=C(SCCCCN2CCNCC2)C=C1                  | 0.276743 | 0.277375 |
| SAJUMWGDQUCTNA  | [O-][N+](=O)C1=CC(C(=O)NC2=C(F)C=CC=C2)=C(NC  | 0.243909 | 0.224004 |
| XQNKEFPXJRALFI  | CC1=C(NC(=O)C2=CC=C(CN3C=C(Cl)C=N3)C=C2)C=    | 0.242182 | 0.2297   |
| QJPYARHRMNJIKM  | CNC1=C(NC)N=C2C=C(C=CC2=N1)[N+](C([O-])=O)[N+ | 0.272746 | 0.240023 |
| ZOUZBYNFKZTCNL  | CC1N(C(C)=O)C2(CCCCC2)CC(C)(C)C3=C1C=CC=C3    | 0.251064 | 0.241683 |
| RJRWCDQVJJBARX  | COC1=C(OC)C=C(C=C1)C2=NOC(=N2)C3=C(C=C(Cl))   | 0.273981 | 0.256925 |
| DAOGNIPTKRWQJW  | COC1=CC=C(C=C1)C2=C(CN(C)C)C(C3=CC=CC=C3)C    | 0.278685 | 0.258549 |
| KQINOEXPQWEJAM  | BrC1=CC=C(C=C1)S(=O)(=O)NC2=CC=C(CC3=CC=NC    | 0.240033 | 0.226413 |
| MWXKPEOYDRTWIC  | CCN(CC)CCN(C)C1CCC(CC1)C2=CC=CC=C2            | 0.310398 | 0.311834 |
| SQFIEPRJZMJXRF  | COC1=CC=C(\C=C2\C(=O)OCC3=C2C=C(OC)C(OC)=     | 0.253443 | 0.245448 |
| MHRGHFADWRHYKY  | CCC(C)NCCOCCOC1=C(C=CC=C1)C2=CC=CC=C2         | 0.301892 | 0.232626 |
| ODXWTIQZKBOZDX  | CN(C)CCOC1=C(Br)C=C(Cl)C=C1                   | 0.272005 | 0.238658 |
| NCXKSMOKOSHEEE  | ClC1=C(OCCCNCC2=CC=CC=C2)C=CC(Br)=C1          | 0.264843 | 0.242828 |

|                 |                                               |          |          |
|-----------------|-----------------------------------------------|----------|----------|
| WTJDIXPHKATLQB  | CN(C)CCCCOC1=C(C)C=C(Br)C=C1C                 | 0.305926 | 0.276265 |
| KNTZMAYDEMUNCX  | CN(C)CCCCOC1=C(C=CC=C1)C2=CC=CC=C2            | 0.339629 | 0.302217 |
| ZBBUAIZGIYNBOY  | CC1=CC(CI)=C(OCCCCNCC2=CC=CC=C2)C(C)=C1       | 0.307363 | 0.252166 |
| XETJGRBNXWFOH   | CC1=CC(Br)=C(OCCCCNCC2=CC=CC=C2)C(CI)=C1      | 0.27672  | 0.252872 |
| WHIGUJZLRRODIW  | COC1=C(CCN2CCC(CC2)C(C)(C)C)C=CC=C1           | 0.297601 | 0.270705 |
| WJQZLOXABWPCAW  | COC1=C(OC)C=C(CCN(C)CC2=CC(OCC3=CC=CC=C3)     | 0.339181 | 0.271889 |
| YYDFKGIJNPKQQQ  | COC1=C(OCC2=CC=CC=C2)C=CC(CN(C)CCC3=CC=C      | 0.401605 | 0.360606 |
| ITNUOBZVVCQYIR  | CCN(CC)C1=CC=C(CN(C)CCC2=CC(OC)=C(OC)C=C2)    | 0.334503 | 0.299884 |
| XEYKJRJBLPXUCX  | COC1=C(OC)C=C(CCN(C)CC2=CC(OC)=C(OCC3=CC=C    | 0.325147 | 0.282293 |
| MLIFNSQYMKISJW  | CC1CC(C)CN(C\C=C\C2=C(C=CC=C2)[N+][O-])=O)C1  | 0.281585 | 0.227441 |
| QMPBAKPCKCRGHI  | CC1=C(C)C(=CC=C1)N2CCN(CCC3=CC=CC=C3)CC2      | 0.25568  | 0.226921 |
| IUBPKAQOGIZZMD  | CC1=CC=C(C=C1)N2CCN(CCC3=CC=CC=C3)CC2         | 0.288821 | 0.250854 |
| WRRZWDSPRAYBPJ  | COCCCNCCCOC1=C(Br)C=C(CI)C=C1                 | 0.299634 | 0.233344 |
| PCXONJJXYHRMLO  | CCCCNCCOCCOC1=C(Br)C=C(C)C=C1                 | 0.282992 | 0.266048 |
| QFJSLSKIXKEPTJ  | COCCNCCCOC1=C(Br)C=C(C)C=C1CI                 | 0.267079 | 0.223332 |
| SZDOLPMWCLBLPB  | CC1=C(OCCCCNCC=C)C=CC(Br)=C1                  | 0.248674 | 0.229995 |
| INVREHUUDVSVED  | CC(C)(C)NCCOCCOC1=C(C=CC=C1)C2=CC=CC=C2       | 0.238834 | 0.227292 |
| UWUNEDSBUNJFED  | CC(C)NCCCOC1=C(Br)C=C(CI)C=C1                 | 0.239915 | 0.241699 |
| WVFCDXUZPLZEQW  | CC1=CC(C)=C(C=C1)\N=C(/S)NCCC(C2=CC=CC=C2)C   | 0.24037  | 0.229318 |
| ZDJIVOYTTMIHIB  | SC(NCCC1=CC=CC=C1)=NC2CCCCC2                  | 0.255591 | 0.234471 |
| PTNNZVXQWGI VTC | COC1=CC(OC)=C(C=C1)\N=C(/S)NCCC(C2=CC=CC=C    | 0.246382 | 0.227297 |
| JYJAYGWGJVISOU  | COC1=C(OCC2=CC=C(CI)C=C2)C(Br)=CC(\C=N\O)=C   | 0.27093  | 0.272407 |
| WTJCHZPEHFPZBV  | O\N=C\C1=C(OCC2=C(CI)C=CC=C2)C=CC(CI)=C1      | 0.250658 | 0.250519 |
| KDTYLDXGROQMAF  | CCOC1=CC(C=NO)=CC(Br)=C1OCC2=CC=C(CI)C=C2     | 0.246765 | 0.233795 |
| UDJLUJZUDPOEGL  | SC(NCCSCC1=C(CI)C=C(CI)C=C1)=NC2=CC=CC=C2     | 0.248655 | 0.227818 |
| DUUYHYIRJTUWIV  | CN(C1CCCC1NS(=O)(=O)C2=CC=C(CI)C=C2)C3=CC     | 0.291317 | 0.289375 |
| GRHHTAWTWPMOCU  | COC1=C(C=CC=C1)C2=C(N=C3C=CC=CC3=N2)C4=C      | 0.272994 | 0.275834 |
| WXTQEVVFWKQQN   | CC1=CC=C(C=C1)C(=O)C2=C(C=CC(=C2)[N+][O-])=O  | 0.248788 | 0.234146 |
| XLFGZKSNBLRCLB  | CC1=C(C)C=C(C=C1)C(=O)C2=C(C=CC(=C2)[N+][O-]) | 0.249252 | 0.240692 |
| ZTQVXCWBAVXCSE  | COC1=CC(=CC=C1)N=C(S)NCCC(C2=CC=CC=C2)C3=     | 0.254426 | 0.237341 |
| UUKRSZSKURUMHQ  | CCS(=O)(=O)N1CCN(CC1)C2=CC(NC(C)C3=CC=CC=C    | 0.254859 | 0.250009 |
| AMNSTBWPBHSZPR  | CN1CCN(CC1)C2=C(C=C(C=C2)[N+][O-])=O)C(=O)C3  | 0.283707 | 0.267488 |
| MJYRMLLWMCTTIQ  | CN1CCN(CC1)C2=C(C=C(C=C2)[N+][O-])=O)C(=O)C3  | 0.293635 | 0.287741 |
| PQYVCNAZBXRPCW  | COC1=C(OC)C=C(C=C1)C(=O)ON=C(N)CC2=C(CI)C=C   | 0.276635 | 0.253194 |
| PFUGFBVKYUACM   | ClC1=CC=C(CN2CCC(CC3=CC=CC=C3)CC2)C=C1        | 0.277424 | 0.272434 |
| CMKIHTVZYQPCON  | CC1=CC=C(C=C1)C2=NN(C=C2CSC(N)=N)C3=CC=CC     | 0.270936 | 0.278969 |
| WTPMCLVFWZNZLZ  | CCN1CCN(CC1)C2=C(C=C(C=C2)[N+][O-])=O)C(=O)C  | 0.301531 | 0.273319 |
| JKMSYEBQUVJADV  | COC1=CC=C(OCC(O)CN2CCC(CN3C(=O)C4=CC=CC5      | 0.262012 | 0.240932 |
| AQXXEMGKTDAVAP  | CCCCN(CCCC)CC(O)CN(C1=C(OC)C=CC(=C1)[N+][O-   | 0.288332 | 0.237776 |
| ABHCKRUQSBLDMN  | NC(N)=N\N=C\C1=CC=C(OCC2=C(CI)C=CC=C2)C=C1    | 0.257896 | 0.245632 |
| JVWWXYXUTLHZCP  | CC1=C(NC(=O)C2=CC=C(CN3CCC(CC4=CC=CC=C4)C     | 0.319018 | 0.292276 |
| TUWASWOKSINXMU  | NC(N)=N\N=C\C1=CC=C(OCC2=CC=CC=C2)C=C1        | 0.325212 | 0.307717 |
| VOHLOXVZTUDANM  | N\C(CC1=CC=C(C=C1)[N+][O-])=O)=N/OC(=O)C(C2=  | 0.252031 | 0.269748 |
| YGTWHYDKFQWMCH  | NC(N)=N\N=C\C1=CC=C(OCC2=CC=C(CI)C=C2)C=C1    | 0.241435 | 0.242204 |
| BBIHYZVVPNDFEM  | CC1CCN(CCOCCOC2=C(Br)C=C(CI)C=C2)CC1          | 0.298705 | 0.259711 |
| UDGMUTVGJWZWCW  | CC1CCN(CCOCCOC2=C(CI)C=C(Br)C=C2)CC1          | 0.244909 | 0.257697 |
| UMJQMNYMVGJEGV  | COC1=C(CCNCC2=CC(OCC3=CC=CC=C3)=C(OC)C=C      | 0.263698 | 0.254971 |
| FYHJDLFXHYHVCBK | CC(C)C1=C(OCCNC(S)=NC2=C3C=CC=CC3=CC=C2)C     | 0.239342 | 0.227725 |

|                 |                                              |          |          |
|-----------------|----------------------------------------------|----------|----------|
| GXOGKKIFMLZWLU  | CC(=O)OC1=C(C(NC(=O)CC2=CC=CC=C2)C3=CC=CC    | 0.293168 | 0.256774 |
| FQYQIFZGAFMKAJ  | CC1CN(CC(=O)NC2=CC=CC(=C2)C(=O)NC3=CC=CC(=   | 0.238652 | 0.226907 |
| BJWLIQNCLGRWV   | CC(C)C1CCC(C)CC1OCC(O)CN2CCN(CC3=CC=CC=C     | 0.257906 | 0.225113 |
| LRIADFAHJSIJAO  | CCOC1=CC=C(C=C1)C2N(C(=O)CC3=C2C=C(OC)C(O    | 0.249514 | 0.239915 |
| IMSXHNJZMPDAEB  | [O-][N+](=O)C1=CC(=CC=C1)C2=NC(=NO2)C3=CC=N  | 0.239749 | 0.258163 |
| OUFLODBNKFDTL   | [O-][N+](=O)C1=CC=C(OC\C=C2/OC3=C(C=C(C=C3)) | 0.253403 | 0.227211 |
| DLFJEYJDKJLRAF  | CC1=C(NC(=O)C2=CC=C(CN3CCC4=C(C3)C=CC=C4)    | 0.24334  | 0.23137  |
| FXPMPLOCTNNVFP  | COC1=C(C=CC=C1)N2CCN(CC2)C(=O)C(SC3=CC=CC    | 0.282973 | 0.251696 |
| JYHAMVSBYCEZJP  | CC(=O)NC1=C(CN2CCN(CC2)C3=CC=C(F)C=C3)C4=C   | 0.247098 | 0.23522  |
| NVPULQRBTOUZRC  | CCN(CC)C1=CC=C(NC(=O)C2=CN=C(Cl)C=C2)C=C1    | 0.256886 | 0.237046 |
| GKMONRSASOZVEV  | ClC1=CC(NC(=O)CN2C=CSC2=N)=C(OC3=CC=CC=C3    | 0.256225 | 0.224262 |
| LMEPYNNZHODNKD  | ClC1=CC=C(C=C1)C(=O)ON=C2CCCCCN2             | 0.261029 | 0.244546 |
| UADSTFVNKMVGDE  | N(\N=C\C1=NC=CC=C1)C(=NC2=CC=CC=C2)C3=NC=    | 0.286497 | 0.292809 |
| KQYMEUWGNWTQNR  | CCOC1=C(CSC(N)=N)C=C(Br)C=C1                 | 0.281344 | 0.279148 |
| WDUWPOZKU AURIE | CC1=CC=C(C=C1)C(C)(CC=C)NCC2=CC=CC=C2        | 0.262989 | 0.278159 |
| JTKBDFHJBRBLSV  | COC(=O)C1=CC=C(C=C1)N=C(S)N2CCN(CC3=CC=C(C   | 0.269151 | 0.244285 |
| LDEYTFPHRHGQRH  | COC1=CC(OCCNC2=C(C=CC(=C2)N3CCCCC3)[N+](     | 0.249056 | 0.233926 |
| LSUAQIXSFSVXIF  | CN(C)CCCN\C=C1\C(=O)N(CC2=CC=CC=C2)C(=O)C3   | 0.247202 | 0.239207 |
| YPLQRLFGAHJJMA  | C(N1CCC(CC1)NC2=C3C=CC=CC3=NC(=N2)C4=CC=     | 0.289017 | 0.263103 |
| GQKRTCAGSAQWNB  | CCN(CC)CCCN\C=C1\C(=O)N(CC2=CC=CC=C2)C(=O)   | 0.258025 | 0.244755 |
| KQXYFFACRYKBSU  | CC1=C(C)C2=C(S1)N=CN=C2NCC(C)(C)N3CCOCC3     | 0.244776 | 0.234025 |
| KDHMYSSPRFRNGI  | COC1=CC=C(\C=N\NC2=NC(=NC(=C2)N(C)N(C)C      | 0.266296 | 0.24128  |
| NSQKAUNDMZCXQV  | CC1=C(C=CC=C1)N2N=NN=C2SC3=NN=NN3C4=CC       | 0.291403 | 0.27816  |
| FCZRGYLWLUFHGZ  | COC1=C(OC)C=C(C=C1)C2=NN3C(SC2)=NN=C3C4=C    | 0.245332 | 0.247939 |
| RRQBCJDYYQAJST  | CCN1CCN(CC1)C2=NC3=C(S2)C=CC=C3              | 0.24037  | 0.229621 |
| RBHZGVFTWLUADV  | OCl(=O)(=O)=O.CCN(CC)C1=NC(C2=C1C=CC=C2)=[N  | 0.245852 | 0.22294  |
| ZWNRUJRFBJWEW   | BrC1=CC=C(\C=N\NC(=O)C2=C(C=CC=C2)N3C=CC=C   | 0.260385 | 0.238299 |
| OWDUKYZZXKSFOO  | C1CCC(CC1)NC2=N\C(=N/C3CCCCC3)C4=C2C=CC=     | 0.360836 | 0.294729 |
| ROCHHJNADQTSRD  | CCNC(S)=NC1=CC=C(C=C1)N(C(C)C)C2=CC=CC=C2    | 0.270387 | 0.262171 |
| MORMFMXGUXFXPZ  | COCCNC(S)=N\N=C(/C)C1=CC=C(C=C1)N2C=CN=C2    | 0.292075 | 0.228418 |
| MJKRXXRUOWINKG  | CSC1=NC(=NC(=N1)C(Cl)Cl)C2=CC=CC=C2          | 0.250071 | 0.25862  |
| LWYDHIFSDUAOND  | CC1=CC=C(C=C1)C(N2CCC3=C2C=CC=C3)C4=NN=N     | 0.244246 | 0.232952 |
| BVSQAVPIRWSWLO  | COC1=CC=CC(=C1)C(=O)OC2=C(CN3CCOCC3)C=C(C    | 0.244879 | 0.227579 |
| WQWNBRGPFIQDJL  | COC1=CC=C(OCCNC2=C(C=CC(=C2)N3CCCCC3)[N+     | 0.251808 | 0.244449 |
| JLLCHARGIPYMIT  | CN(C#N)C1=NC(NC2=CC=C(C)C=C2)=NC(Cl)=N1      | 0.262774 | 0.260843 |
| SMEHUBTZJNZVHX  | CCN(CC)CC#CCC(C)(C1=CC=CC=C1)C2=CC=CC=C2     | 0.38835  | 0.336544 |
| YZEUWNDTGFSRCI  | CC1=NC(N\N=C\C2=CC=C(C=C2)[N+](O)=O)=NC(=    | 0.247765 | 0.260534 |
| PURCLPLAJBDPSN  | [O-][N+](=O)C1=C(\C=N\N2CCN(CC2)C3=NC=CC=C3  | 0.259568 | 0.253784 |
| MBMXWDHGHXRCPM  | NC1=NN=NN1\N=C\C2=CC(=C(C=C2)N3CCCCC3)[N     | 0.238929 | 0.234311 |
| QJZSHERJMUXCMW  | CC1=CC(C)=NC(SC2=C(C=C(C=C2)[N+](O)=O)[N+](  | 0.257076 | 0.234556 |
| HFBVLGXCYLGKMD  | CN(CC#CCC(C1=CC=CC=C1)C2=CC=CC=C2)C(C)(C)C   | 0.372097 | 0.314107 |
| GFBQXPRGIHEBLZ  | CCN(CC)CCSC1=NC2=C(N=N1)C3=C(C=CC(C)=C3)N    | 0.259049 | 0.247738 |
| BOPZIFGDYDKFKQ  | CN1CCN(CC1)C2=CC(=NC3=C(C(C)=NN23)C4=CC=C    | 0.264005 | 0.244663 |
| MGRKMZUXHDFOOZ  | COC1=CC=C(C=C1)N2C(=O)C3=C(SC4=C3CCCC4)N     | 0.281702 | 0.230283 |
| WJVYVQYNRUSJKO  | CN(C(=S)OC1=CC=C(C=C1)C(=O)NC2=CC=CC=C2)C3   | 0.246119 | 0.223807 |
| IBAJVZQIEQKVFA  | CCN1CCN(CC1)C2=CC(=NC3=C(C(C)=NN23)C4=CC=    | 0.240913 | 0.22458  |
| NIVKYFMSODCHBA  | CN1CCN(CC1)C2=C3C=CC=CC3=NC(=N2)C4=NC=C      | 0.329415 | 0.282151 |
| RSVSVTFVNBBOUK  | [O-][N+](=O)C1=CC(=CC(=C1)C2=NNC(=N2)C3=CC=C | 0.263427 | 0.264576 |

|                 |                                                          |          |          |
|-----------------|----------------------------------------------------------|----------|----------|
| XFUOWSIVPDOZPZ  | CC(C(=O)C1=CC=C(C=C1)C2=CC=CC=C2)[N+] <sup>3</sup> =CC=C | 0.268108 | 0.23712  |
| XTOYWMZBOPJBBF  | N=C1N(CC2=CC=CO2)C=NC3=C1C(=C(O3)C4=CC=C                 | 0.248664 | 0.248202 |
| JVYMSPPKDODTNF  | ClC1=CC=C(C=C1)C2=NN3C(SC2)=NN=C3C4=CC(=N                | 0.2496   | 0.244768 |
| PRCHRZJMNMUBL   | CN(C)CCSC1=NC(=NC2=C1C3=C(CCCC3)S2)N4N=C                 | 0.253736 | 0.222428 |
| RWEAXGZDJDTGQE  | CN(C)CCSC1=NC(=NC2=C1C3=C(COC(C)(C)C3)S2)N               | 0.280864 | 0.236126 |
| IYUNTXJINBRJRQ  | CCCCN1C(=O)NC(=O)\C(=C(\CC)NC2=C(OC)C=C(OC)              | 0.245617 | 0.225867 |
| JHWCAUPFKZRTML  | CN(C)CCCN(C(=O)C1=CC(C)=CC=C1)C2=NC(CC(=O)N              | 0.338251 | 0.282082 |
| HQHQLMLBBPGIHNK | CN1C2CCC1C=C(C2)N(CCC3=CNC4=C3C=CC=C4)C                  | 0.285992 | 0.24881  |
| GROOKPHVLDTGUFU | CC1=CC(CC(CC2=NC3=C(N2)C=CC=C3)C4=NC5=C(N                | 0.246313 | 0.227245 |
| PYRRMLCJNCDFH   | SC(NC1CC2CCCC(C1)N2C3CC3)=NC4=CC=C(Cl)C=C                | 0.302018 | 0.269984 |
| OUERQWUICBAUMO  | COC1=CC2=C(C=C1)N3CCN(CC4=CC=CC=C4)\C(=N,                | 0.265921 | 0.259951 |
| GRNUHFOJCOJSEC  | ClC1=CC(=CC=C1)N2C(=O)N=C3SC4=C(C=CC=C4)N:               | 0.240184 | 0.236639 |
| YWNDEYAFFWAJB   | CCOC(=O)C1=CC=C(C=C1)N=C(S)NC2CC(C)(C)NC(C)              | 0.295499 | 0.229362 |
| YTCMZQLKSYRJL   | CCOC1=CC=C(C=C1)C2=NC3=C(C=CC=C3)C(=NN2)C                | 0.24939  | 0.254651 |
| GEWWLRYGMYJUOD  | NC(CC1=CC=C(Cl)C=C1)=NOC(=O)C2=CC3=C(C=CC=               | 0.248826 | 0.273662 |
| IYHJBMSFLDJGMU  | CC1=C(C(=O)CN2CCN(C\C=C\C3=CC=CC=C3)CC2)C                | 0.263794 | 0.237549 |
| LVIRGEJLFCULO   | CCN1C2=C(C=C(Cl)C=C2)[N+](CC)=C1\C=C\N(C)C3=             | 0.254182 | 0.273631 |
| BJFQOTJNLNGRAJ  | COC1=CC=C(C=C1)C2=NC(=NC(=C2)C#N)N3CCN(C)                | 0.255563 | 0.262139 |
| GDKCAAWSNQLXNX  | CC1=NC(NCC2=CC=CC=C2)=NC(NC3CCCCC3)=C1                   | 0.264837 | 0.256431 |
| HUJNAXQVFZTBDR  | SC(NC1=CC=CC=C1)=NC2=CC=C(OCC3=C(Cl)C=C(Cl)              | 0.255    | 0.266112 |
| BKIOGOWYGSGBSJ  | CC1=CC2=C(C=C1)N=C(N2)C3CCN(CC4=NN=NN4)                  | 0.280227 | 0.238798 |
| OBKYREAEPMNVOJ  | ClC1=CC=C(CN2CCC(CC2)C3=NC4=C(N3)C=CC(Cl)=               | 0.303523 | 0.273599 |
| OCXSAVQTZUMWDB  | CC1=CC=C(CN2CCC(CC2)C3=NC4=C(N3)C=CC(Cl)=C               | 0.331812 | 0.278622 |
| DOLRSKODGZOLBF  | CC1=CC=C(CN2N=NN=C2CN3CCC(CC3)C4=NC5=C                   | 0.247172 | 0.236633 |
| ONORYECFZPCHNK  | CCOC(=O)NC1=CC2=C(SC3=C(C=CC=C3)N2C(=O)CC                | 0.245448 | 0.233303 |
| CKIKNERKNNTMPA  | CCN(CC)C1=C2N=CN=C2N(CC3=C(Cl)C=CC=C3Cl)C:               | 0.267831 | 0.242575 |
| YGUJRTGZNGUEFD  | CCN1C2=C(C=CC=C2)C3=C1C=CC(CN4CCN(CC4)S(C                | 0.267513 | 0.24145  |
| MBZRJXDWSXXRPA  | C1CN(CCN1C(C2=CC=CC=C2)C3=CC=CC=C3)C4=NC                 | 0.248705 | 0.233439 |
| YCGSVDGHSBHCMU  | COC1=C(C=CC=C1)N2CCN(CCCCOC3=C4C=CC=CC4                  | 0.313558 | 0.279757 |
| VOHCIXMVPQJCBT  | CC(CNCC1CCCO1)COC2=C3C=CC=CC3=CC=C2                      | 0.251533 | 0.241533 |
| GTWFZIQZWKDHQG  | COC1=C(C=CC=C1)N2CCN(CCCCCOC3=CC=C(F)C=                  | 0.298113 | 0.263616 |
| MDXWCEKNISCBOB  | CCN(CC)C1=C(C2=CC=CC=C2)C(N)=C3C=CC=CC3=N                | 0.240425 | 0.230594 |
| QLHAVMTYLGFGPT  | ClC1=CC(Cl)=C(CN2C=CC(=N)C=C2)C=C1                       | 0.271441 | 0.243274 |
| WVTBKMSZTWLEJF  | ClC1=C(CN2C=CC(=N)C=C2)C=CC=C1                           | 0.271074 | 0.262528 |
| HUYPSQORIFAKE   | CCCCCCN1C=CC(=N)C=C1                                     | 0.262247 | 0.244402 |
| IYHZRMBBRCHWHH  | COC1=CC=C(C=C1)C(=O)C(CCCCC(CN(C)C)C(=O)C2=              | 0.281717 | 0.242561 |
| XPUBUHIUUWTNML  | O=C(NC1=CC=C(C=C1)C2=CSC(=N2)C3=CC=CC=C3)                | 0.246698 | 0.246927 |
| OEXXRKSNZNGLHY  | COC1=C(OCCN2CSC(=S)N(C)C2)C=CC=C1                        | 0.253816 | 0.264487 |
| BNHBFAPJZHNXTE  | CCOC1=CC=C(C=C1)C2=CN=C3CCCN23                           | 0.272677 | 0.235484 |
| ZJCAADTWXGBVBW  | CCCCCOC1=C(C=C(CSC(N)=N)C=C1)[N+](O)=O                   | 0.249218 | 0.22495  |
| BJBBLXXEJYVLNN  | CCOC1=C(C=C(Br)C=C1)C(\C)=N\NC2=NCCN2                    | 0.26512  | 0.254706 |
| AYTQUIGQFYMRK   | CCOC1=NC(=NC(SCCOC2=C(Cl)C=C(Cl)C=C2)=N1)N               | 0.267378 | 0.243543 |
| CYTLIRHZWTZIJZ  | C(C1=CC=CC=C1)[N+] <sup>2</sup> =C3C=CC4=C(C=CC=C4)C3=C  | 0.2487   | 0.231302 |
| JXOJPBJBHDCLFP  | CCOC(=O)C1=C(OC2=C1C(CN3CCN(C)CC3)=C(O)C=C               | 0.246573 | 0.225478 |
| SKOYRHCAKHQCLN  | COC1=CC=C(C=C1)N2CCN(CC2)C(=O)CN3CCN(CC3                 | 0.259455 | 0.223898 |
| QQFAOBCJMZDGFZ  | CN(CC1=C(C)N(C)N=C1)S(=O)(=O)C2=CC3=C(C=CC               | 0.239592 | 0.259298 |
| GBXSKDSBFPTQMT  | CCN1C(=NC2=C1C=CC=C2)N3CCN(CC3)C(\S)=N\CC                | 0.267151 | 0.240905 |
| YULJENCEDMKCBO  | CCC1=CC=C(C=C1)N=C(S)NC2CC3CCCC(C2)N3CC4:                | 0.284357 | 0.250846 |

|                 |                                               |          |          |
|-----------------|-----------------------------------------------|----------|----------|
| HQFPUAJGLRNHNO  | CC1=CC=C(C=C1)N=C(S)NC2CC3CCCC(C2)N3CC4=C     | 0.295065 | 0.257934 |
| WBVWGGCUSNNYOF  | CC1=CC(=CC=C1)N=C(S)NC2CC3CCCC(C2)N3CC4=C     | 0.308497 | 0.270967 |
| SNFOZKYWNCUNHB  | CC1=C(C)C=C(C=C1)N=C(S)NC2CC3CCC(C2)N3CC4=C   | 0.283641 | 0.227691 |
| HKTRXPBQEMJXKL  | C(CC1OC2=C(SC3=C1C=CC=C3)C=CC=C2)CN4CCCC      | 0.316914 | 0.30781  |
| VCPJENOVITMSR   | C(C1=NC2=C(O1)C=CC=C2)C3=CC=C(CC4=NC5=C(C     | 0.299757 | 0.275173 |
| PGECPCGYLPPUBG  | CC1=C(C=CC(=C1)S(=O)(=O)N(CC2=CC=CS2)CC3=C(I  | 0.252013 | 0.228872 |
| NERDWIVQEVZSNB  | CCN1C(CN2CCN(CC2)C3=CC=C(CI)C=C3)=NC4=C1C     | 0.252168 | 0.234743 |
| MSELVEFUVDXEPF  | COC1=CC(OC)=C(C=C1)N2CCC3=C(C)N=C4C(OC)=C     | 0.276135 | 0.245015 |
| ZVCLXPNROWCWPR  | COC1=CC=CC2=C3N(CCC3=C(C)N=C12)C4=C(OC)C:     | 0.268771 | 0.230743 |
| BQVHJQPCNMOJBF  | ClC1=CC=C(C=C1)N2N=NN=C2C3=C(N=C(N=C3)C4:     | 0.243665 | 0.229535 |
| MXYNGMIPFOZVCR  | CC1=NC2=NC(=CN2C(=C1)N3CCN(CC3)C4=C(CI)C=     | 0.244122 | 0.243705 |
| BTDUZNAUJSTJOU  | CO\N=C\C1=CC(=C(C=C1)N2CCN(CC2)C(=O)C3=CC:    | 0.240237 | 0.227143 |
| RITAQUDKGCTMA   | C1CCCCC1.OCCN2CCN(CC2)C3CC4=C(SC5=C3C=C       | 0.28294  | 0.266781 |
| IAMLCAUGORULLB  | CN1CCN(CC1)C2=CC3=C(SC4=C2C=C(F)C=C4)C=C(C    | 0.293028 | 0.284276 |
| WWRPLVWWTUOKJ   | CN(CC\C=C1/C2=C(CSC3=C1C=CC=C3)C=CC=C2)CC     | 0.324258 | 0.310959 |
| YKTFPDPMGVDHHH  | COC1=CC=C(C=C1)N2N=CC(=C2C3=CC=C(CI)C=C3):    | 0.269567 | 0.255814 |
| HMRMLANCYBERPV  | ClC1=CC=C(C=C1)C2=C(C=NN2C3=CC=CC=C3)S(=O,    | 0.254434 | 0.239178 |
| IGIHZEVHFLGLQF  | COC1=CC=C(C=C1)C2=CC=NC3=NC(=NN23)N4CCN       | 0.246951 | 0.228403 |
| UHVLSVIMQYIHDO  | CC1=C(C(=O)N\N=C(/N)COC2=CC=C(CI)C=C2)C(=NC   | 0.272981 | 0.243256 |
| OUETVWDFEBXIIG  | CC(C)(C)N(NC(=O)NC1=CC(CI)=C(CI)C=C1)C(=O)C2= | 0.251624 | 0.230376 |
| PXIVFERFHLBIGX  | ClC1=CC2=C(NC=C2C3=NN=NN3C4=CC=CC=C4)C=       | 0.240473 | 0.233035 |
| MVHXEQFYJFVGQN  | FC1=CC=C(C=C1)N2N=NN=C2C3=C(N=C(N=C3)C4=      | 0.260204 | 0.231116 |
| NOGWKIKUGIOGRI  | CC1=CC2=C(C=C1)N=C(C)C=C2NC3=CC4=C(OCCO4      | 0.268129 | 0.225097 |
| ZJALJNUPIKLBOV  | CCOC1=C(OCC2=CC=C(F)C=C2)C(CI)=CC(CNC3CCCC    | 0.269672 | 0.258111 |
| GXEKCEZPKBONE   | OCCCCNCC1=CC=C(OCC2=CC=C(CI)C=C2)C=C1         | 0.270147 | 0.246912 |
| QOOVZEKTHKXNJ   | OCCCCNCC1=CC=C(OCC2=C(CI)C=C(CI)C=C2)C=C1     | 0.26296  | 0.243654 |
| CANIKTZQFIBYRL  | COC1=C(OCC2=C(F)C=CC=C2)C(CI)=CC(CNC3CCCC     | 0.287985 | 0.268563 |
| MRYDXMIUFMHLSD  | BrC1=CC=C(C=C1)C2=NC(N3CCSCC3)=C(N=N2)C4=     | 0.262059 | 0.264087 |
| IZGSUERWAGXCGI  | CCN1CCN(CC1)C2=NC(=NC(SC(C)C)=C2)C3=CC=C(C    | 0.240543 | 0.229686 |
| PMNWGMNJCRIDQV  | CCN1CCN(CC1)C(C2=C(NC(=O)C3=CC=CC=C3)SC(C)    | 0.276969 | 0.238416 |
| CJKCFLYRDSJZME  | COC1=CC(\C=N\NC2=NC(=NC(NC3=CC=C(C)C=C3)=     | 0.255239 | 0.235452 |
| WVBGVKOFVTPUES  | CN(C)C1=C(N=C(O1)C2=C(CI)C=CC=C2)P(=O)(C3=CC  | 0.253342 | 0.227641 |
| DGSLNAYNGJCLCL  | CC1CN(CC(C)N1)C2=C(N=NC(=N2)C3=CC=C(Br)C=C    | 0.303237 | 0.293099 |
| WRPDQUCFOSSPJS  | CN1CCN(CC1)C2=C(N=NC(=N2)C3=CC=C(Br)C=C3)(    | 0.251378 | 0.240815 |
| GYLHKEZFHVNIOV  | ClC1=CC(OP(=O)(NC2=CC=CC=C2)NC3=CC=CC=C3):    | 0.298656 | 0.249435 |
| AUILCEXTYULELM  | COC1=CC(C2=NNC(=C2)C3CCN(CC3)C4=C(C=CC=N      | 0.252365 | 0.243057 |
| PLHQKCFXFAHOHFS | BrC1=CC=C(OC2=NC=C(CN3CCN(CC3)C4=CC=CC=C      | 0.254929 | 0.229893 |
| OEFIQMOFTOGRZ   | Cl.CCOC1=CC(CNCCC2=CC=C(C=C2)S(N)(=O)=O)=CC   | 0.241554 | 0.222518 |
| GFQBXMRQGFENBF  | O=S(CC1=NC(=NC(SC2=CC=CC=C2)=C1)C3=CC=CC=     | 0.240356 | 0.226956 |
| CENHMPXIORHGRL  | ClC1=CC=C(C=C1)S(=O)(=O)C2=C(N=NS2)C3=CC=CC   | 0.242191 | 0.235364 |
| XWPUVAJJDJDDX   | COC1=CC(=CC=C1)N2CCN(CC2)C3=C(C#N)C(=NN3(     | 0.247449 | 0.222598 |
| OGPAHBYNEJBWTE  | CNS(=O)(=O)C1=C(C=CN=C1)N2CCN(CC2)C3=CC(=C    | 0.256322 | 0.232834 |
| LFTVZXRUGJNGFT  | COC1=CC=C(C=C1)N2CCN(CC2)C3=C4NC5=CC=CC:      | 0.254583 | 0.223995 |
| XMFRZFUHINORMI  | OC(N\C=N\OCC1=C(CI)C=C(CI)C=C1)=NOCC2=C(CI)   | 0.283842 | 0.281888 |
| YSKUMRJOXCGCBL  | CC1=C(CS(=O)(=O)C2=NC3=C(C=CC=C3)N=C2)C=CC    | 0.277092 | 0.257727 |
| YHXAHRDOPRQCT   | CN1CCN(CC1)C2=C(NC(=O)C3=CC=C(O3)C4=C(CI)C    | 0.272445 | 0.236843 |
| ODCWNXRKYVORLL  | CN(C)C1=NC(=CS1)C2=CC=C(C=C2)[N+](=[O-])=O    | 0.284667 | 0.274167 |
| QZPDHIOGDDQVGR  | CC1=CC(C)=C(NC(=O)C2=CC=C(CN3CCC4=C(C3)C=C    | 0.293524 | 0.255487 |

|                |                                              |          |          |
|----------------|----------------------------------------------|----------|----------|
| HQYYPEABZCQIEL | C1C1=CC=C(COC2=C(CNCC3=CN=CC=C3)C=CC=C2)(    | 0.30036  | 0.254454 |
| KTTXGCPAHAFTBD | CCC(=O)N1CCN(CC1)C2=CC=C(NC(=O)COC3=C(Cl)C   | 0.255071 | 0.226537 |
| ZCHSTDVIRRYJIR | CC1=CC=C(C=C1)N2C(SCC3=NC(=NO3)C4=CC=C(C)I   | 0.255798 | 0.248343 |
| RSFJKZMNGBNBFH | CCOC1=C(OCC2=CC=C(Cl)C=C2)C(Br)=CC(CNCCO)=   | 0.258411 | 0.245762 |
| BTIJWSSNPZJRY  | CCN(CC)CCN1C(=N)N(CCO2=CC=CC=C2)C3=C1C=      | 0.341264 | 0.311611 |
| HMVDPSBMURUMKW | CC1=CC=C(C=C1)C2=NOC(CSC3=NN=C(CC4=CC=CC     | 0.259091 | 0.269486 |
| DWJBIVQOEBBMFX | C1C1=CC=C(C=C1)C2=NOC(CSC3=NN=C(N3C4=CC=     | 0.242136 | 0.243139 |
| QPNWPFVICLCAAX | CCCN(CCC)C1=NC(=NC(N)=N1)C2=C(OC)C=CC(Cl)=   | 0.266316 | 0.25953  |
| QRDQOMFEFIBBJS | CN(C)CC1=C(C=CC=C1)C2(O)C3=C(CSC4=C2C=CC=C   | 0.271217 | 0.23783  |
| QOVIQRJRTXKFJU | C1C1=CC=C(NC(=O)NCCCN2CCC3=C(C2)C=CC=C3)C    | 0.296091 | 0.246647 |
| MDDRWSNZRGJWKC | COC1=C(CC(=O)NC2CC(C)(C)NC(C)(C)C2)C3=C(C=C1 | 0.258583 | 0.224234 |
| FEOPHKIAPXXDQZ | CSC1=CC=C(C=C1)C(=S)N2CCN(CC3=CC=CC=C3)CC:   | 0.245074 | 0.225781 |
| OLYZPQGCRYWJMC | COC1=C(OCC2=CC=C(Cl)C=C2)C=CC(CNCCN3CCOC     | 0.302001 | 0.246019 |
| VUEWAEOLVLURHX | CCCSC1=NC(=NC(=C1)N2CCN(C)CC2)C3=CC=C(OC)I   | 0.277369 | 0.264384 |
| NWCOFZGRQWJPBX | C(COC1=CC2=C(CCC2)C=C1)CN3C=NC4=C3C=CC=C     | 0.274285 | 0.263966 |
| YLBHFMBUTMFLKO | CN(C)CCNC(=O)C1=CC=C(COC2=C(Cl)C=C(Cl)C=C2)( | 0.277685 | 0.255412 |
| JNXNYTVXYJGSGV | COC1=C(OCC2=CC=C(F)C=C2)C(CNCCC3=CNC4=C3     | 0.268576 | 0.252809 |
| MCMRMQBQACIYAS | COC1=C(OCC2=CC(Cl)=CC=C2)C=CC(CNCC3=NC=CC    | 0.277395 | 0.239589 |
| PAPIOPHQCDRZNX | C1C1=CC=C(CN2CCN(CC2)C3=NC=NC4=C3C(=CS4)C    | 0.250623 | 0.229843 |
| HZOUVFXIEDZQBR | CC1=CC2=C(N=C(N=C2NCCCN3CCOCC3)C(F)(F)F)C    | 0.258292 | 0.22447  |
| WARDEZUQTYBQRX | CCN(CC(=O)NC1=CC(C)=NN1C2=NC(C)=CC(C)=N2)C   | 0.24035  | 0.226414 |
| VYOSGODVAZSQCF | NC1=NC(NC2=CC=CC=C2)=NC(CN3CCC(CC4=CC=C      | 0.288962 | 0.237617 |
| YAYHYWWKCFAPKI | COC1=CC=C(C=C1)C(CNC(=O)C2=C(OC)C=C3C=CC=    | 0.264231 | 0.253994 |
| QUHMQOAHHLRDNE | COC1=C(OCCCN2CCCC2)C=CC(\C=C\C)=C1           | 0.255939 | 0.238356 |
| NUODQPXIBAZSKZ | C(CCN1CCCC1)COC2=CC=C(OCC3=CC=CC=C3)C=C      | 0.257634 | 0.240084 |
| MPADXQRDLMSCFA | CCCN(CS)=NC1=CC=C(NC2=CC=CC=C2)C=C1          | 0.288323 | 0.251095 |
| CFPFBAMQBRZFTB | CCCN(CCC)CC#CCOC1=CC=C(OC)C=C1               | 0.271162 | 0.247791 |
| ZHTQDAFKFNIAEJ | C(COC1=CC=C(OCC2=CC=CC=C2)C=C1)CN3CCCCC:     | 0.257222 | 0.2592   |
| YBDBDLJYQGTTEL | CC1=C(OCCCCN2CCCC2)C(=CC=C1)C(C)(C)C         | 0.243866 | 0.224456 |
| KVXDMAVJTSWXQE | COC1=CC(OCCSC2=NC(N)=CC(N)=N2)=CC=C1         | 0.239818 | 0.223623 |
| RECJWNWZVDPHTR | CC1=C(C=O)C(C=O)=C(C)N1CC2=CC=CC=C2          | 0.244862 | 0.232724 |
| MLCOUDSAHVZGSZ | CCOC1=NC(=NC(NC2=CC(Cl)=C(OC)C=C2)=N1)N3C    | 0.269773 | 0.255403 |
| IZPMIQXCORNEBS | CCN(CCC(=O)NC1=CC(C)=C(Br)C=C1)CC2=CC=CC=C   | 0.256573 | 0.23563  |
| PAEBNEQLSFRKPA | O=C(NC1=CC=C(C=C1)C(=O)OC2CCCC2)C3CCCCC:     | 0.25204  | 0.237197 |
| NZQDIZLTOXEKBJ | CCNC1=NC(SCCOC2=CC=C(C)C=C2)=NC(NC(C)C)=N:   | 0.265105 | 0.242753 |
| VCAFBCJZFWGQQ  | CC1CCN(CC1)C(=O)N2C3=C(SC4=C2C=CC=C4)C=CC    | 0.250991 | 0.227216 |
| KZMNEUDJPXGUHK | C1C1=CC(Cl)=C(CN2C=C(\C=N\N3C=NN=C3)C4=C2C   | 0.244947 | 0.235614 |
| NCCDUMYZJREKV  | CCN(CC)C1=CC=C(C=C1)N2C(C)=CC(C=O)=C2C       | 0.256139 | 0.243559 |
| ZZAZHFYLWKJNNT | CC(C)(C)CC(C)(C)NCC(O)COC1=C(F)C=C(Br)C=C1F  | 0.245399 | 0.225201 |
| XCWZVWQOWUAVHN | CCOC(=O)C1=C(C)SC2=C1N(C(=O)CN(CC)CC)C3=C(S  | 0.294352 | 0.252865 |
| CXEOXHFRVSMJHA | CC1=CC(CN2CCN(CC3=CC=C(Cl)C=C3)CC2)=CC=C1    | 0.259853 | 0.250702 |
| BIEBYLJZXQGHFD | CC1=CC(=CC=C1)C(=O)O\N=C(/N)CC2=CC=C(C=C2)[  | 0.273664 | 0.266462 |
| IIRYXZKXMAAGME | C(N1CCN(CC1)C2=NC3=CC=CC=C3C4=C2C=CC=C4      | 0.241336 | 0.232658 |
| OMLVVIWJFYCDRC | CC(C)NCCOCCOC1=CC(C)=C(Cl)C(C)=C1            | 0.254571 | 0.247578 |
| XBVINISZBXHUEW | COC1=CC=C(C=C1)C(N)=NOC(=O)C2=CC(=CC=C2)[N   | 0.251064 | 0.236771 |
| FYDXTSDJPHQUMZ | CC1(C)CC2=C(C=CC=C2)C(NNC(=O)C3=NC=CC=C3)=   | 0.258864 | 0.259171 |
| BIEKBOAPWJBVSP | CCCN(\N=N\C1=CC(=CC=C1)[N+][[O-])=O)C2=CC=C  | 0.261652 | 0.282121 |
| CKMYOVXRWBUCBE | COC1=CC2=C(C=C1)C(C)=CC(=N2)N3CCN(CC3)C4=C   | 0.255031 | 0.25855  |

|                 |                                              |          |          |
|-----------------|----------------------------------------------|----------|----------|
| PAWJOLDYSVNDLF  | CCCCCOC1=CC=C(CN2CCN(CC)CC2)C=C1             | 0.286693 | 0.245299 |
| DEIZXTGKXXFXFL  | COC1=C(C=CC=C1)N2CCN(CC3=C(Cl)C=C(Cl)C=C3)C  | 0.238949 | 0.231574 |
| JFDUNNTVXUDHSF  | CCN(CC)C1=CC=C(CN2CCC(=CC2)C3=CC=C(F)C=C3)   | 0.283119 | 0.243135 |
| YLHNXEFEKGQGGX  | ClC1=C(C=CC=C1)C2=CC=C(CN3CCN(CC3)C4=CC=C    | 0.270965 | 0.243345 |
| HXAALNHUNDFNAG  | ClC1=CC(NC(=O)NC2=CC=CC=C2)=CC(Cl)=C1        | 0.245722 | 0.249688 |
| VWJAYGIZVFLNFB  | CN1CCCN(CC2=C(Cl)C=C(Cl)C=C2)CC1             | 0.251786 | 0.259278 |
| TWFBQVYJVVPGEV  | CCN1CCN(CC2=CC(OC3=CC=C(Cl)C=C3)=CC=C2)CC    | 0.306901 | 0.293709 |
| RHTVLVDZUFGCM   | CN1CCN(CC2=CC(OC3=CC=C(Cl)C=C3)=CC=C2)CC1    | 0.307474 | 0.271274 |
| YQZHTUZDSCIWGT  | CC1=C(C=CC=C1)N2CCN(CC3=CNC4=C3C=CC=C4)C     | 0.285961 | 0.245243 |
| CCNHJWKQNZUWBC  | CN(C)C1=C(C#N)C(=NC=C1)N(CC2=CC=CC=C2)CC3=   | 0.27707  | 0.261018 |
| HLWGQPDMRUMUBC  | CC1CCN(CC(O)COCCC2CC4CC(CC(C4)C2)C3)CC1      | 0.348043 | 0.277936 |
| UXFUFUAMAGXED   | CCN(CC)CCN1C(NC(=O)C2=CC=C(Cl)C=C2)=NC3=C1   | 0.248297 | 0.253075 |
| XHNLICSHYXRRRU  | CCCCN1CCC2=C(N)C3=C(C=CC(Br)=C3)N=C12        | 0.260035 | 0.228709 |
| MIQFBVNMSNEFFS  | O=S(=O)(OC1=CC=CC=C1)\C=C\C2=CC=CC=C2        | 0.295943 | 0.250122 |
| GUFZUGXNBXBWFF  | CC1=NC2=C(C=CC=C2)C(=C1)N3CCN(CC3)S(=O)(=O   | 0.253497 | 0.22249  |
| LRGXJHPESRPBJJ  | CCOC(=O)C1=C(NS(=O)(=O)C2=CC=C(OCC)C=C2)C(=  | 0.272353 | 0.241055 |
| SADMOYKKNMBFNC  | COC1=C(OC)C=C(C=C1)C2=C(C)NN=C2C3=C(O)C=C(   | 0.244513 | 0.229336 |
| JPWJXSIDSZJDAS  | COC1=C(C=CC=C1)N2CCN(CC2)C3CCN(CC3)S(=O)(=   | 0.287977 | 0.247834 |
| MXPFZKGBTAPXGI  | COC1=C(Br)C=C(CN2CCN(CC2)S(=O)(=O)C3=CC=C(C  | 0.243764 | 0.263949 |
| QJJDJGGXMIKHG   | CCN(CC)S(=O)(=O)C1=CC=C(C=C1)C2=CC=C(C=C2)S( | 0.241129 | 0.245988 |
| SGYJJYITWMLWJY  | CC(C)(C)N1N=NN=C1C(N(CC2=CC=CS2)CC3=CC=CC    | 0.307727 | 0.271183 |
| ZYWQCSWVZKNUOJ  | N#CC1=CC(=CC=C1)C(N2CCCCC2)C3=NN=NN3C4       | 0.258296 | 0.249588 |
| XJGLRLPMNQYBO   | COC1=C(C=CC=C1)C(N2CCCCC2)C3=NN=NN3CCC       | 0.302162 | 0.264554 |
| KYDHPCWYILKKLP  | FC1=CC=C(CN(CC2=CC=CC=C2)C(C3=CC=CS3)C4=N    | 0.247757 | 0.231548 |
| PHLXQWKNUVUFUHP | FC1=CC=C(C=C1)C(N2CCCC3=C2C=CC=C3)C4=NN=     | 0.247492 | 0.234254 |
| NUUCIGIMSHFSTN  | CC(C)(C)N1N=NN=C1C(N(CC2=CC=CC=C2)CC3=CC=    | 0.319273 | 0.309759 |
| FSBUWEPMPXKRBG  | COC1=CC(=CC(OC)=C1OC)C2=NN=C(O2)C3=CC=CC:    | 0.257155 | 0.336998 |
| HUQUQRMXRCGVHV  | CCOC1=NC(OCC)=NC(NC2=CC(Cl)=C(OC)C=C2)=N1    | 0.260138 | 0.265169 |
| KQFQDPQDZXEMJO  | CN1CCN(CC1)C2=CC(=NC3=CC(=NN23)C4=CC=C(F)    | 0.246146 | 0.242567 |
| KNLBJJWWKPSMLJ  | CCN1CCN(CC1)C2=CC(=NC3=CC(=NN23)C4=CC(F)=    | 0.244057 | 0.242604 |
| DTAVDUKDVHWDGI  | N(C1=NC(=CS1)C2=CC=NC=C2)C3=CC=CC=C3         | 0.254201 | 0.241849 |
| LLZBBUSYDDCIHI  | CCN(CC1=CC=CC=C1)C(C2=NN=NN2C(C)(C)C)C3=C(   | 0.24289  | 0.23784  |
| PUUZKSNYSNKYBU  | CCN(CC1=CC=CC=C1)C(C2=NN=NN2C(C)(C)CC)C3=    | 0.298531 | 0.295844 |
| DSIJIWPKYALVPW  | CCOC1=CC2=C(C=C1)N=C(NN=C2C3=CC=C(C)C=C3)    | 0.244884 | 0.276015 |
| QBMPNWRHTXHPPC  | CCCCOC(=O)CC(N1CCCC1)C(=O)OCCCC              | 0.239931 | 0.226294 |
| JQMVBGTGLWRZBN  | COC1=C2C=CC=CC2=C(C=C1)C(=O)C3=CC=C(C=C3)    | 0.252312 | 0.257148 |
| BKDOYQAYQBPWCW  | CCN1C(CNC2=CC=C(Cl)C=C2)=NN=C1SCC3=CC=C(C    | 0.245259 | 0.225344 |
| ZPHWBMFZZUNXAS  | CC1=CC(NC2=NC(=NC(=N2)N3CCCC3)N4CCCC4        | 0.241051 | 0.237882 |
| VLOLDCVHFBJWEG  | CC1=CC=C(CN2CCN(CC3=C(C=CC=C3)C(F)(F)CC2)    | 0.264588 | 0.243797 |
| YZUYACPEASIANE  | CCOC1=CC2=C(C=C1)N=C(NN=C2C3=CC=C(C)C=C3)    | 0.24471  | 0.25416  |
| JWOKQHIWSOTUTQ  | CC1=C(NC2=NC(SC3=NCCS3)=NC(NC4=C(C)C=CC=C    | 0.241394 | 0.237423 |
| KQEROGTWFRRPRET | FC(F)(F)C1=C(CN2CCN(CC3=CC=CC=C3)CC2)C=CC=   | 0.257027 | 0.251673 |
| RPSUUNBXYWODIB  | COC1=C(OC)C=C2C(CC(C)(C)N=C2SC)=C1           | 0.280025 | 0.267    |
| ICSZZKJAACPKQV  | CCN(CC)CCCNC1=C2C=CC=CC2=NC(=N1)C3=CC=CC     | 0.32861  | 0.267006 |
| NXFVZVNBQJQOMR  | CC=1C=C(N(N1)C=2N=C(N=C(N2)N(C3=CC=CC=C3))   | 0.256645 | 0.227422 |
| XXNRZZXPXAFYRJ  | CC1C(N(C)C(CC1(O)C2=CC=CC=C2)C3=CC=CC=C3)C   | 0.281737 | 0.241458 |
| XANBEVHQLOSTKB  | CC(C)C1C(N(C)C(CC1(O)C2=CC=CC=C2)C3=CC=CC=   | 0.309184 | 0.265047 |
| GMKOTCDQUJTHJW  | ClC1=CC=C(CN(CC2CCCO2)C(C3=CC=CS3)C4=NN=     | 0.317542 | 0.271964 |

|                 |                                               |          |          |
|-----------------|-----------------------------------------------|----------|----------|
| ZSXLRXQCIPPUBL  | CN1CCN(CC1)C2=NC(C)=NC3=C2C(C)=C(S3)C(=O)N    | 0.253299 | 0.236367 |
| CPIGJVVUIMHDJX  | FC1=CC=C(CN2CCCN(C2)C(=O)NC3=CC=C(CI)C=C3)    | 0.323143 | 0.301427 |
| KSQQBSHUOFGFPY  | FC1=C(C=CC=C1)N2CCN(CCCNC(=O)CCS(=O))(=O)CC   | 0.30267  | 0.254028 |
| MOUCFYOVUVZKGO  | CCN1C=C(C2=NC(C)CO2)C3=C1C=CC=C3              | 0.272297 | 0.278909 |
| IUQFASBFPJNXNL  | C(NC1CCCCC1)C2=CNC3=C2C=CC=C3                 | 0.2695   | 0.228095 |
| WAORDGOWMGVLES  | ClC1=C(NC(=O)C2CCN(CC3=C(N4C=CC=C4)N(N=C3     | 0.256367 | 0.257249 |
| XXJNZRSVXFNCF   | CC1=CC2=C(N=C(S2)N3CCC(CC3)C(=O)NCCCN4CC      | 0.258055 | 0.242893 |
| XDJPIAZHJWEVFX  | CCN(CC)C(C(=O)NC1=CC=C(C=C1)C(C)C)C2=CC3=C(   | 0.255766 | 0.233078 |
| ZOXGTPAJSZQQQL  | CN(C1CCN(C)CC1)C2=C3C=CC=CC3=NC(=N2)C4=C(     | 0.320793 | 0.261622 |
| GUUNSUFKFQVCAM  | CC1=C(C)C=C(C=C1)N=C(S)NC2CCN(CC3=CC=CC=C:    | 0.282272 | 0.258388 |
| FBPUSSTVPEHJZ   | CN1CCN(CC1)\N=C\C2=CC=C(C=C2)C3=CC=CC=C3      | 0.265678 | 0.262224 |
| CAKMYIPQMBADR   | CC\C(=N/NC(S)=NC(C)C)C1=CC(OC)=C(OC)C=C1      | 0.246971 | 0.249029 |
| JTFAPYUEBOLXAA  | CC(C)C1CCC(C)CC1OCC(O)CNC(C)C2=CC=CC=C2       | 0.270461 | 0.24232  |
| PZBQWXVZZSOME   | CC1=CC=C(C=C1)[N+]2=C3CCCN3C=C2C4=CC=CC=      | 0.257894 | 0.235865 |
| DSNJWBWIHZBKBY  | CC1=CC=C(C=C1)C23CC4CC(CC(CN))(C4)C2)C3       | 0.295495 | 0.248977 |
| JSJDJVKIJBHDEV  | CC1=C(CCN(CC2=CN=CC=C2)C(\S)=N\C3=CC(F)=CC:   | 0.248433 | 0.2402   |
| IOQOTMJQIOAEGE  | ClC1=C(CC2=CN=C(NC(=O)C3=NCCN3)S2)C=CC=C1     | 0.241567 | 0.234102 |
| RGXQSTAXYTZFAH  | CNC1=C(C=CC=C1)C(C)(C)C2=CC(=NO2)C3=CC=C(F)   | 0.254339 | 0.222917 |
| FFZPOJBEZPEIS   | CCOC1=CC=C(OCC(O)CNC2CCN(CC3=CC=CC=C3)C(      | 0.303127 | 0.270691 |
| RGERENBIMAVPHU  | CN(C)CCCN(CC1=CC=CC=C1)C(\S)=N\C2=CC(=CC=C    | 0.260451 | 0.272783 |
| MITHIUBSAMMSKI  | CCCN1CCC(CC1)=NNC2=C(C=C(C=C2)S(=O))(=O)N3C   | 0.261202 | 0.237231 |
| APGNGCGMAUPNGB  | COC1=C(C=CC=C1)N2CCN(CC2)C3=C(CI)C=C(C=C3)    | 0.243243 | 0.22657  |
| WGDSAFOTCQLQRE  | CC1=C(C=CC=C1Cl)\N=C(/S)NC2CCN(CC3=CC=CC=C(   | 0.30783  | 0.278931 |
| DSYPCNCZRPTQR   | SC(NC1CCN(CC2=CC=CC=C2)CC1)=NC3=C(CI)C=C(C    | 0.28007  | 0.269249 |
| UMMYMWVAVAFBMI  | COC1=CC=C(C=C1)C(\C)=N\N=C(/S)NCC(C)=C        | 0.276752 | 0.254756 |
| MUDFBKCKCRBPPG  | CC1CN(CC(O)COC(C2=CC=C(CI)C=C2)C3=CC=C(CI)C   | 0.252275 | 0.249417 |
| HNUKTONMTDKSNL  | CC(C)(C)CC(C)(C)\N=C(/S)NC1CCN(CC2=CC=CC=C2)  | 0.287308 | 0.270425 |
| ZTSTZMCJXAIHKT  | COC1=CC=C(C=C1)C(CNC2=C(C=C(C=C2)S(=O))(=O)N  | 0.26057  | 0.233946 |
| GYEAWEXUZSBOFM  | CCN(CC)C1=CC(CC(C)(C)C1)=[N+]2CCCC2           | 0.282649 | 0.251619 |
| KOLGEUCXCXNGKF  | CC(CCC1=CC=CC=C1)NC(S)=NC2=C(C)C=CC=C2C       | 0.249077 | 0.231689 |
| IRLFCKFNNDZJQF  | CCCCNC(S)=N\N=C\C1=C(F)C=CC=C1                | 0.25943  | 0.253975 |
| WGAIKQUMPSQOC   | COC1=CC(NP(=O)(OC2=C(CI)C=CC=C2)OC3=C(CI)C=   | 0.241621 | 0.244178 |
| JHLURTREAGIFPK  | CC1(C)CC(=CC(C1)=[N+]2CCCC2)N3CCCC3           | 0.253277 | 0.231637 |
| WJMIMXYRGJRXJX  | CC(NC(=O)NC1=CC(CI)=C(CI)C=C1)C(N2CCOCC2)C3   | 0.257532 | 0.248355 |
| XMHYKWUTXHOZPS  | CC(NC(S)=NC1=C(CI)C=C(CI)C=C1)C(N2CCCC2)C3=C( | 0.252378 | 0.233179 |
| XIRMZKNKBAGVWMK | OC(COC(C1=CC=C(CI)C=C1)C2=CC=C(CI)C=C2)CN3C   | 0.271347 | 0.261525 |
| RFDWBDBJZPGSDV  | OC(COC(C1=CC=C(CI)C=C1)C2=CC=C(CI)C=C2)CN3C   | 0.260448 | 0.244901 |
| SVSVLBHIFZWSRG  | CC1=C(NC2=NN=C(CS2)C3=C(F)C=CC=C3)C=CC=C1     | 0.254433 | 0.244371 |
| UJRLZGIGEHBNG   | NC(=O)C1=C(NC(=O)CN2CCCC2)SC(=C1)C3=CC=C(     | 0.245546 | 0.245693 |
| WHJMAVKRZMGXCB  | COC1=CC(OC)=C(\C=N\OCC(=O)NC(C2=CC=CC=C2)(    | 0.244935 | 0.23488  |
| CZHISYXHAMLNPP  | COC1=C(OC)C=C2CN(CCC2=C1)C3=NC(CN4CCCC4       | 0.244448 | 0.248398 |
| RATWPNWVUUMXKZ  | CC1CCN(CC1)C2=NC(CN3CCCC3)=NC4=C2C(=CS4       | 0.269432 | 0.251373 |
| GTMGOATVZUJYOY  | COC1=C(OC)C=C(C=C1)C2=NN(C=C2\C=N\NC3=NC:     | 0.241144 | 0.249326 |
| WIHHAAMSUSMUNX  | COC1=C(OC)C=C(CN(C)C(C)C(=O)NC2=C(CI)C=C(C=C  | 0.247926 | 0.226956 |
| FFRXGZVWUXIOFC  | CCC1=CC=C(C=C1)N=C(S)NC2CCN(CC3=CC=CC=C3)     | 0.265847 | 0.252621 |
| UHKRNZBRPHNBOS  | COC1=CC(=CC(OC)=C1OC)C2=NN=C(CSC3=NN=C(N      | 0.248032 | 0.235106 |
| UPICNCXVCNWBJJ  | FC1=CC(\C=N\NC(S)=NC2=C(CI)C=CC=C2)=CC=C1     | 0.243045 | 0.231542 |
| SBDIXHSCQKEGEH  | CCN(CC1=CC=CC=C1)C2=CC=C(\C=N\N=C(N)N)C=C:    | 0.25771  | 0.262021 |

|                 |                                               |          |          |
|-----------------|-----------------------------------------------|----------|----------|
| SLVVATXCONJWRI  | FC1=C(NC(=O)NC2=CC(Cl)=CC=C2)C=CC(Br)=C1      | 0.244086 | 0.248123 |
| GDTXUEISIGTSKV  | CC(C)C(C)NC(=O)COC1=CC=C(SC2=CC=C(OCC(=O)N    | 0.247817 | 0.240641 |
| UQSMUJOGDKXYLDZ | CC(C)C1=CC=C(C=C1)N=C(S)NC2CCN(CC3=CC=CC=C    | 0.262555 | 0.250498 |
| YISSDERVCSJHT   | C1CC2=C(CN1C3=NC=NC4=C3C(=CS4)C5=CC=CC=C      | 0.253868 | 0.234918 |
| RQLJXERUJHJDFLW | CN(CC1=NC(NC2=C(C)C=CC=C2)=NC(N)=N1)CC3=C     | 0.280409 | 0.255483 |
| STTBDSZTRDAOTP  | [O-][N+](=O)C1=CC(C(=O)N2CCC3=C2C=CC=C3)=C(C  | 0.258773 | 0.238622 |
| BRYADXWQXOCNNO  | CCNC1=NC(CN2CCCC2)=NC3=C1C(=CS3)C4=CC=C       | 0.288609 | 0.266619 |
| GQJNFXFTZTBLZ   | OC(CNC1CCCC2=C1C=CC=C2)COC3=C(Cl)C=CC=C3      | 0.242803 | 0.256259 |
| JSDVJMOIUAOCKP  | COC1=C(OC)C=C(CNCCC(C2=CC=C(F)C=C2)C3=CC=C    | 0.268216 | 0.26088  |
| UILQWCDDYAJXJZ  | COC1=CC=C(C=C1)N2N=NN=C2C3N(C)C(C)(C)CC4=     | 0.325976 | 0.300529 |
| QLJKULLHBGHQDQ  | CCN(CC)CC1=CC=C(NC(=O)C2=C(Cl)C3=C(S2)C=C(Cl  | 0.25698  | 0.236475 |
| QOAGYTJZVXSXHX  | CC(C)OP(=O)(C(NC1=CC=CC=C1)C2=CC=CC=C2)C3=    | 0.264216 | 0.227045 |
| WSPSTYUUVYFNI   | COC1=CC=C(C=C1)C(CCNCC2=CC=C(F)C=C2)C3=CC     | 0.25584  | 0.251794 |
| LTARLXNMDBFWOI  | COC1=CC=C(C=C1)C(CCNCC(C)C2=CC=CC=C2)C3=CC    | 0.242686 | 0.238863 |
| JKQHGOLFKHLBOU  | COC1=CC=C(C=C1)C(CCNCC2=CC=CC=C2)C3=CC=C      | 0.258667 | 0.238005 |
| VKNDOFXTCCPRML  | COC1=CC=C(CNCCC(C2=CC=C(F)C=C2)C3=CC=C(OC     | 0.268539 | 0.246418 |
| KQVIYHJSXGPHKZ  | COC1=CC=C(C=C1)C(CCNCC2=C(F)C=CC=C2)C3=CC     | 0.242441 | 0.263106 |
| RCNXXRUYIDGGD   | COC1=CC=C(C=C1)S(=O)(=O)N2C(COC3=C2C=CC=C     | 0.281529 | 0.223582 |
| DVXFIGSTXDVTMY  | CN(C)CCCNS(=O)(=O)C1=CC=C(OC2=C(Cl)C=C(C=N2   | 0.267121 | 0.258557 |
| WDPAIMDQTHEXQA  | CN1C2=C(C=CC=C2)C(\C=N\OC(=O)C3=CC=C(F)C=C    | 0.247936 | 0.23362  |
| LKVPXJLABQUOEI  | COC1=CC=C(CNCC(O)(C2=CC=CC=C2)C3=CC=C(Cl)C    | 0.267791 | 0.254083 |
| ZMIRPKQRKYFMDH  | COC(=O)C1=CC=C(C=C1)N2CCC(CC2)C3=CC(=NN3      | 0.243653 | 0.23307  |
| SLDHMWQQBRXOPJ  | CCOC(=O)C1(CCN(CC2=CC=C(Cl)C=C2)CC1)S(=O)(=   | 0.263577 | 0.255117 |
| BPJVHYKTKRZBIP  | ClC1=C(Cl)C=C(CN2C=C(CCN3CCS(=O)(=O)CC3)C4=   | 0.240144 | 0.226402 |
| DEAUJTDWFWZDHU  | CC1=CC=C(C=C1)S(=O)(=O)C2=C(OC3=C(C)C(C)=CC=  | 0.253902 | 0.239316 |
| XWRNYKBJTXUZEB  | CC1=CC2=NC(=C(CN3CCOCC3)N2C=C1)C4=CC=CC=      | 0.263791 | 0.24596  |
| FXMKRHIUUZIFV   | COC1=CC(=CC=C1)C(=C\C2=C(N=C3N2C=CC=C3)C      | 0.253718 | 0.227124 |
| ZECTTYWBFIVMLX  | CN(C)C1=C(C#N)C(OC2=CC=C(C=C2)C(C)(C)C)=NC=C  | 0.285124 | 0.260584 |
| DIKNWBKZSAJDIQ  | CN(C)C1=C(C#N)C(OC2=CC=C(Cl)C=C2)=NC=C1       | 0.254382 | 0.246646 |
| SCNLPUFJULYTHF  | COC1=C(SC2=CC(Cl)=CC=C2)N=C(N=C1)C3=NC=CC=    | 0.275853 | 0.241239 |
| UUDMVIMMEVTSAD  | COC1=C(SC2=C(Cl)C=CC=C2Cl)N=C(N=C1)C3=NC=C    | 0.26492  | 0.263236 |
| QKSGRSQVRBFEB   | COC1=C(OC)C=C(CNCC(O)(C2=CC=C(Cl)C=C2)C3=C    | 0.248013 | 0.238731 |
| NMEOYLUNPQMPFS  | COC1=C(CNCC(O)(C2=CC=C(Cl)C=C2)C3=CC=C(Cl)C   | 0.271317 | 0.234187 |
| BGVKRGSSHQCQDF  | COC1=CC=C(CNCC(O)(C2=CC=C(Cl)C=C2)C3=CC=C     | 0.262525 | 0.242372 |
| LZZXJXVVDIPROL  | COC1=C(SC2=CC=C(Cl)C=C2)N=C(N=C1)C3=NC=CC=    | 0.270523 | 0.238542 |
| ALSLDYJTFGXFLD  | CN(C)C1=NC(C2=C(Cl)C=C(Cl)C=C2)=C(C=N1)S(=O)( | 0.252113 | 0.245953 |
| JBGNGFJSYNQYML  | OC(CSC1=C(Cl)C=CC=C1)CN2CCN(CC2)C3=CC=C(F)    | 0.340483 | 0.279504 |
| JLCZXQCYGWUHC   | CCOC1=C(OCC)C(Br)=CC(CNCC2=CC=CS2)=C1         | 0.291985 | 0.238563 |
| JJKQQRKSKAEBE   | COC1=C(OCC2=C(Cl)C=C(Cl)C=C2)C=CC(CNCC3=NC    | 0.250162 | 0.224856 |
| NOEWXKXWASRWJB  | COC1=C(OCC2=C(Cl)C=C(Cl)C=C2)C=CC(CNCCN3CC    | 0.318243 | 0.282092 |
| YBVSECASAQHRMH  | FC1=C(COC2=C(CNCC3=CC=NC=C3)C=CC=C2)C=CC      | 0.29238  | 0.240816 |
| QFESFPVBIJPECI  | O=C1CC(=C(C2=CC=CC=C2)C3=CC=CC=C3)C(=O)N1     | 0.238684 | 0.222769 |
| AIXGNQFHVKZCMK  | ClC1=CC(Cl)=C(OCC(=O)N2CCCN(CC2)C(=O)COC3=C   | 0.25451  | 0.235772 |
| JGIYPOIEJZBYNH  | OC1=C2N=CC=CC2=C(CN3CCN(CC3)C4=CC=CC=C4       | 0.268944 | 0.230745 |
| CCHLMSUZHFPSC   | CC1=C(CSC2=NC3=C(N2)C=CC=C3)N=CC=C1OCC(F)     | 0.248925 | 0.227032 |
| OMVOIQOJAQKYML  | ClC1=CC=C(C=C1)C(N2CCSCC2)C3=NN=NN3CCC4=      | 0.266275 | 0.252164 |
| SKJFQDYGDDOQEC  | CC(C)(C)N1N=NN=C1C(N(CC2=CC=CO2)CC3=CC=C      | 0.281621 | 0.269151 |
| ZSCFGJKUZUBHLP  | FC1=CC=C(NC(=O)CN2CCC(CC2)C(=O)C3=CC=C(F)C    | 0.275539 | 0.268205 |



|                  |                                                                     |                                |          |
|------------------|---------------------------------------------------------------------|--------------------------------|----------|
| BXIXXXYDDJVHDL   | <chem>Nc1cc(Cl)ccc1N</chem>                                         | 4-Chloro-1,2-diaminobenzene    | 0.228573 |
| VVBLNCFGVYUYGU   | <chem>CN(C)C1=CC=C(C=C1)C(=O)C2</chem>                              | Michler's ketone               | 0.240754 |
| USSIQXCVUWKGNF   | <chem>Cl.CCC(=O)C(CC(C)N(C)C)(c1c</chem>                            | Methadone hydrochloride        | 0.285051 |
| VYZAHLCBVHPDDF   | <chem>O=[N+](O-)]c1cc(ccc1Cl)[N+](</chem>                           | 1-Chloro-2,4-dinitro           | 0.24828  |
| OUPZKGBUJRBP GC  | <chem>O=C1N(CC2CO2)C(=O)N(CC3C</chem>                               | 1,3,5-Triglycidyl isocyanurate | 0.225639 |
| STJLVHWMYQXCPB   | <chem>CCCC1COC(CN2C=NC=N2)(O1</chem>                                | Conazole Mix II (116           | 0.241877 |
| TXUZVZSFRXZGTL   | <chem>Oc1ccc(cc1)C(\c2ccc(OCCN(C</chem>                             | (Z)-4-Hydroxytamoxifen         | 0.227634 |
| OPNUROKCU BTKLF  | <chem>Cc2ccccc2NC(=N)Nc1ccccc1</chem>                               | 1,3-Bis(2-methylphe            | 0.244254 |
| VYWPPRLJNVHPEU   | <chem>O=C(CCl)c1ccc(Cl)cc1Cl</chem>                                 | 2,2',4'-Trichloroacetophenone  | 0.222392 |
| JAWNWEKHDFBPSG   | <chem>N=C1NC(=N)C2=C1C=C3C=CC</chem>                                | 1,3-Diiminobenz(f)-isoindoline | 0.265547 |
| NAZZKEZTSOOC SZ  | <chem>CC1=CC=NC2=C1C=CC3=CC=CN=C23</chem>                           |                                | 0.25202  |
| BRPQDJPIBCQFSR   | <chem>CC1=C(C)C2=C(N=CC=C2)C3=NC=CC=C13</chem>                      |                                | 0.241215 |
| GHYKV VHGPCZVOG  | <chem>C1COCCOC2=CC=CC=C2OCCOCCOCCOC3=CC=CC=C3OCCOCCO</chem>         |                                | 0.337227 |
| IYZPSKNKXWSFJB   | <chem>CC(CC1=C(SC2=C(O)C=CC=C2)</chem>                              | Specs, AE-641/30177025, NSC-2  | 0.236716 |
| BTMBDRIKPNQIGA   | <chem>CN1CC2CC3=CC=CC=C3SC4=CC=CC(=C24)C1</chem>                    |                                | 0.27999  |
| ODRWNMOVHUSDRV   | <chem>NCC/C=C1/C2=CC=CC=C2CSC3=CC=CC=C13</chem>                     |                                | 0.309386 |
| HCENOERZKIRXPE   | <chem>FC1=CC=C(C=C1)C(OCCN2CCCC2)C3=CC=C(Br)C=C3</chem>             |                                | 0.327283 |
| GHZNNDWKJRHDC K  | <chem>CC(OCCN1CCCC1)(C2=CC=C(F)C=C2)C3=CC=C(F)C=</chem>             |                                | 0.267714 |
| HLSOHEMSDNNTJI   | <chem>ClC1=CC=C2SCC3=CC=CC=C3(\C4=N\CCN4)C2=C1</chem>               |                                | 0.351451 |
| DQOHSEZYXSACCG   | <chem>CN(C)CC1=CC=C(SC2=CC=CC(=C2)Cl)C=C1</chem>                    |                                | 0.233094 |
| LRJYCOXCGLJCLI   | <chem>CN(C)CC1=CC=CC(=C1)SC2=CC=CC=C2Cl</chem>                      |                                | 0.298488 |
| DGDOAYXAWGZZMH   | <chem>CN(C)CC1=C(C)[N](CC2=CC=CC=C2)C3=C1C4=CC(=CC=C4C3=O)</chem>   |                                | 0.234983 |
| UNTIDFUZYGXBI    | <chem>OC(C1CN2CCC1CC2)(C3=CC=CC=C3)C4=CC=C(Cl)C=C4</chem>           |                                | 0.304612 |
| VWJJD NBPVIMITE  | <chem>CCCOC1=CC=C(C=C1Cl)\C2=C\ S\C3=N\CCN23</chem>                 |                                | 0.256073 |
| LNWZCAHWXGGAY    | <chem>CCN(CC)C1=CC=C(C=C1)\C=N\N=C(S)\NCC2=CC=C(OC)C=C2</chem>      |                                | 0.243089 |
| WHVNGICQKYBDDP   | <chem>FC(F)(F)C1=CC2=C(SC3=C(C=CC=C3)N2CCCN4CCN(CCCl)CC4)C=</chem>  |                                | 0.226867 |
| VBWVJZYUPVDPN    | <chem>FC1=CC=C(C=C1)C(=O)CCCN2CCC3=C(C2)C4=CC(F)</chem>             |                                | 0.248005 |
| AIEOARPRTKSOKM   | <chem>CC1=CC=C(C=C1)C(O)(C2CN: Chem Div, D090-015</chem>            |                                | 0.249766 |
| DJCAGMWMFPMXHO   | <chem>CCN1CSC(=S)N(C1)CC2=CC=CC=C2</chem>                           |                                | 0.280821 |
| RUAJRKRPPGDWBK   | <chem>NCCC1=C([N](C2=CC=CC=C2)C3=CC=CC=C13)C4=CC=CC=C4</chem>       |                                | 0.225931 |
| LURMIKVZJSMXQE   | <chem>CCN(CC)CCN1C2=C(SC3=C1C=CC=C3)C=CC=C2</chem>                  |                                | 0.271419 |
| QUXNTLCQMWWQBGC  | <chem>CCOC(=O)C1=C(C)[N](C2=CC=C(C)C=C2)C3=CC=C(O)C(=C13)CN(</chem> |                                | 0.226335 |
| SNBUOLJXURTGNE   | <chem>NC1=NC=NC(=C1\N=N\C2=CC=CC=C2)N</chem>                        |                                | 0.249263 |
| CSJUPLAKKSKSQQ   | <chem>CC[N]1C2=CC(=C(Cl)C=C2[N+](=C1\C=C\NC3=CC=C</chem>            |                                | 0.239913 |
| NWDOJCD SZHOIRR  | <chem>COC1=CC(=CC(=C1OC)OC)C2=NOC(=C2C#CC3=CC=</chem>               |                                | 0.23847  |
| RABUWGWSP OYGN O | <chem>BrC1=CC=C(CN2CC[C@H]3\C=C/CC4=CC=CC(=C34)C2)C=C1</chem>       |                                | 0.24224  |
| OVPXVDTVZJWVGC   | <chem>O=C1CCN(CCC2=CC=CC=C2)CCN1[C@H](CSC3=CC=CC=C3)C4=</chem>      |                                | 0.228265 |
| CDWTXYBGOGVCD S  | <chem>CNC(C)C#CC1=C(C)ON=C1C2=CC(=C(OC)C(=C2)OC)</chem>             |                                | 0.242049 |
| YNCQFVAVWUBVJA   | <chem>COC1=CC(=CC(=C1OC)OC)C2=NOC(=C2C#CC3=NC=C[N]3C)C</chem>       |                                | 0.223615 |
| ZBHN VUQCYBDIJW  | <chem>COC1=CC(=CC(=C1OC)OC)C2=NOC(=C2\C=C\C3=CC</chem>              |                                | 0.250499 |
| DOZLGCD BIUCXPZ  | <chem>COC1=CC(=CC=C1F)C2=C(C)ON=C2C3=CC(=C(OC)C(=C3)OC)OC</chem>    |                                | 0.253951 |
| LNFIOWKUVKUCNC   | <chem>O=C1CCN(CCN1[C@H](COC2=CC=CC=C2)CC3=CC=</chem>                |                                | 0.25847  |
| OCAXFDULERPAJM   | <chem>CN1C2CCC1CC(C2)OC(C=3C= 3-alpha-[(4-CHLOROPHENYL)PHI</chem>   |                                | 0.224289 |
| XDOMZLKSZGWQDP   | <chem>CCN(CC)CCCNC1=N[C@@H](C2=CC(F)=CC=C2)C(C(=O)OC)=C(C</chem>    |                                | 0.244843 |
| BNHZZSKSDXENCK   | <chem>COC1=CC(CNCCC2=CNC3=C2C=CC=C3)=CC=C1</chem>                   |                                | 0.229179 |
| ILTDMXMXER GEPX  | <chem>CCOC(=O)C1=C(N2CCN(CC2)C3=CC=CC=C3)C4=C(C=CC(OCC)=C</chem>    |                                | 0.233785 |
| SWZOJT TWWCZKTG  | <chem>COC1=C(C=CC=C1)C2CCN(CC3=C4C=CC=CC4=CC=C3)CC2</chem>          |                                | 0.284454 |
| RLJCULGZUPDOJI   | <chem>N1C(=NC(=C1C2=CC=CC=C2)C3=CC=CC=C3)C4=CC=CS4</chem>           |                                | 0.224551 |

|                |                                                         |          |
|----------------|---------------------------------------------------------|----------|
| SSWHDVCIDUKFPK | C1CCN(CC1)C2=C3C=CC=CC3=NC(=C2)C4=CC=CS4                | 0.231976 |
| KZKWTMMRPCTLNF | COC1=CC=C(SC[C@H])(CC2=CC=CC=C2)N3CCN(CCC               | 0.246608 |
| ACIVIROIWGWZTE | CCC(CC)COC(=O)C(C#N)C1=N( Vitas-M Laboratory,STK920545  | 0.237099 |
| ICPHJSKVAZMKIV | [H][C@@]1(CN(C)CCC2=CC(O R(-)-SCH-12679 mal€            | 0.263916 |
| LCYDVASONUXCGX | OC[C@@H]1[C@H](C=NN1C2=CC=CC=C2)C3=CC(Cl)=CC=C3)C       | 0.222724 |
| QVEISLUVGUTKAZ | C(N1C[C@@H]2C(C3=CC=CC=C3)C4(CC2(C4))[C@F               | 0.244223 |
| YZVGXJBXRGLPRH | OC(COC1=CC=CC=C1)CN2C(=N)N(CCN3CCCCC3)C4=C2C=CC=C       | 0.22865  |
| XCQBEENDHMMMRU | CSC1(S\C2=N\CCN2)SC3(NCCN3)S1                           | 0.276481 |
| HDIJLRXRAJUXQB | CCC1=C(CC2NCCC3=C2C=CC=C3)CC4N(CCC5=C4C=C(OC)C(OC       | 0.236854 |
| ZIJYGZOMZWSARO | CN(C)CC1=C(C=CC(=C1)C(F)(F)F)C(O)(C2=CC=CC=C2)C3=CC=CC= | 0.24649  |
| FVXMKGRYMOKOFX | OC1CC2CCC(C1)N2CCCN3C4=C(SC5=C3C=C(Cl)C=C5)C=CC=C4      | 0.229326 |
| GGRMGYJBCRHKM  | [O-][S+]1(=O)CCN(CC1)C2=C(CC(C3=C[NH]C4=C3C=CC=C4)C5=C  | 0.263386 |
| YQQOWRFAYJNTDF | CN(C)CCCN1C2=CC=C3C=CC=CC3=C2SC4=CC=CC(=C14)Cl          | 0.247082 |
| VKJJBAAUCOSHBQ | CCN(CC)CCN1C2=C(SC3=CC=C4C=CC=CC4=C13)C=CC=C2           | 0.234646 |
| IUBMTYVIPGXROV | ClC1=CC2=C(C=C1)C(NCCN3CCCCC3)=CC=N2                    | 0.249189 |
| LCHYXWHFOJGIHN | CN(C)C1=CC=C(C=C1)C(C2=CC=C(C=C2)N(C)C)C3=CC=C(C=C3))F  | 0.22254  |
| AAOYLOCWJSLIJU | OC1=C(C=C(Br)C=C1)C(=O)C(=O)C2=C(O)C=CC(Br)=C           | 0.256861 |
| ABWVZIKPCCNRGU | CN1CCN(CC(=O)N2C3=C(C=CC=C3)C(C)(CC2(C)C)C4             | 0.268061 |
| ACAYSFZBEWEESJ | CCN(CC(=O)NC1=C(OC)C=C(C=C1)[N+][O-])=O)C2=C(           | 0.240661 |
| ACEBDVMGZIEHJD | CN1C=C(CN2CCCC(C2)C(=O)NC3=CC(=CC=C3)C4=C               | 0.246922 |
| ACOCVPBXFYMYNV | COC1=CC(=CC=C1)N2CCN(CC2)C(=O)C3=C(C)NC(=C              | 0.240103 |
| AGCCYFQBWLFIQI | ClC1=CC(=CC=C1)N2CCN(CC2)C(=S)C3=CC4=C(OCC              | 0.248475 |
| AICDQXIWWSLIDU | CC1=CC=C(SCCN2CCN(CC3=CC=CC=C3)CC2)C=C1                 | 0.239281 |
| AJIKMVRVZGINJ  | CCOC1=CC=C(OCCOCCN2CCC3=C(C2)C=CC=C3)C=C                | 0.246674 |
| AKWKXFMCOJEAHL | CC1=CN=C(SC2=C(C=C(C=C2)[N+][O-])=O)[N+][O-]            | 0.248802 |
| AKYVRGYXXUMSTM | COC1=CC=C(OC)C2=C1SC(=N2)N(CCN(C)C)C(=O)C3              | 0.239841 |
| ALOCSDLPLYPB   | CC1=CC=C(NS(=O)(=O)C2=C(C)C=CC(=C2)C(=O)NCC             | 0.242532 |
| ALUAIUOWXSRNSF | COC1=CC2=C(SC=C2C3=CC=C(O)C=C3)C4=CC=C(S                | 0.241882 |
| AMCHGSHJMDQEAO | CN(C1=CC=C(C=C1)C(=O)N2CCN(CC3=CC=CC=C3)C               | 0.241391 |
| AMWRRGYURMZDDM | CC1(C)CCCC(C)(C)N1CC(O)COCCOC2=CC=C(Br)C=C              | 0.284319 |
| ANCNMIYALYWRQU | CCNC(S)=N\N=C\C1=CN(CC2=CC=C(F)C=C2)C3=C1C              | 0.248215 |
| ANQGVGTXLLOAND | CCCC1=CC=C(C=C1)C(C)NC(S)=NC2CCCCC2                     | 0.239583 |
| AODUIAGAJDMVAK | CN(C)C1=CC=C(\C=N\NC2=NC=CC=C2)C=C1                     | 0.240398 |
| AOGSEIZPHCFJRK | COC1=C(OC(F)F)C=CC(CN(C)C2=NC=C(C=C2)S(=O))(=           | 0.24829  |
| ASHAMCREPXTDMT | CC1=CC(OCCSCC2=NC3=C(N2)C=CC=C3)=CC=C1                  | 0.246707 |
| ASPBUIUVBTWTAK | CC1=CC=C(C=C1)S(=O)(=O)NCC2=CC=C(C=C2)C(=O)             | 0.253775 |
| ASYHJCPZWQIFAK | NC(=O)C1=C(NC(=O)C2=CC=C(O2)[N+][O-])=O)C3=C(           | 0.238706 |
| ATKYHVZXLZCIR  | OCCN1CCN(CC2=CC(OC3=CC=C(Cl)C=C3)=CC=C2)C               | 0.26551  |
| AUQGAUMQKXUNEM | CC(C)CCNC(S)=NC1=CC2=C(C=C1)N=C(C=C2)N3CC               | 0.244129 |
| AUZXBFTVQZNSY  | COC1=C2N=C3C=CC=C(C(=O)NCCN(C)C)C3=NC2=C1               | 0.254113 |
| AWHPVVQJIDGCTK | COC1=CC(CN2CCCC(C2)C(=O)C3=CC=C(C=C3)C(C)(              | 0.244715 |
| AWILWAIEQYZUEQ | CCC(C)C1=C(OCCCN2CCCC2)C=CC=C1                          | 0.244828 |
| AWPWKYKUKZMFHZ | CN1CCN(CC2=C3C=CC(Br)=CC3=CC=C2O)CC1                    | 0.242968 |
| AYWMOOPWNCZFLH | CCCCCCN1[C@@H](CC2=CC=CC=C2)CN=C1NC3=                   | 0.251073 |
| AZWWKRAUFGDLEV | CC1=CC(C)=NC2=CC(=NN12)C3=CC=CC=C3                      | 0.241632 |
| AZYYTGPPGUBKMK | C(CN1CCN(CC1)C2=CC=CC=C2)SC3=CC=CC=C3                   | 0.256086 |
| BCLKQHNNVNSIB  | CCOC1=CC2=C(C=C1)N=C(S2)N3CCCC(C3)C(=O)NC               | 0.239822 |
| BCQUHCBKPBGUBW | CC1CCN(CC1)C2=CC=C(NC(=O)C3=CC=C(O3)[N+][C              | 0.23985  |

|                 |                                               |          |
|-----------------|-----------------------------------------------|----------|
| BDIWRLFHQNJQPS  | NC1=NC(NC2=CC=C(F)C=C2)=NC(CSC(=S)N3CCN(CC    | 0.245061 |
| BEDWAXDWZAFXKE  | CC1=C(CN2CCC(CC2)C(=O)NCCCN3CCOCC3)N=C(O      | 0.254238 |
| BENHUXHIBFRHAF  | COC1=CC(CCC(C)NCCC(C2=CC=CC=C2)C3=CC=CC=C     | 0.244852 |
| BGXBASVKZMVIMZ  | COC1=CC=C(C=C1)C2=CSC3=C2C(=NC=N3)N4CCN(      | 0.243959 |
| BGYAWMGHQKHEHV  | COC1=C(CC(N)=NOC(=O)C2=C(C)C(=CC=C2))[N+][[O- | 0.264888 |
| BIHVOVYTUAZKHG  | CC(C)CCOC1=CC=C(\C=N\NC(S)=NC2=C(C)C=CC=C2    | 0.242393 |
| BKLVNZQTBJAKRV  | CCN(CC)C(=O)OC1=C(Br)C2=C(C=CC=C2)C=C1        | 0.243203 |
| BLKXRHHHEWFOMN  | COC1=CC=C(\C=N\NC(=O)CSC2CN(C2)C(C3=CC=CC     | 0.239228 |
| BMKCEUMCZXRNL   | ClC1=CC=C(CON2C3=C(C=CC=C3)N=C2C4=CC=C(Cl     | 0.256292 |
| BOGBUFCJECXELS  | CC1=CC=C(C=C1)C(=O)N=C(S)N2CCN(CC2)C3=C(C)C   | 0.240413 |
| BPOGDFBKCFMJIQ  | COCCN1CCC(CNCC2=CN(N=C2C3=CC=CC=C3)C4=C       | 0.250322 |
| BQDQCUMFHPQCKL  | COC1=CC(OC)=C(CNCC2=CC(OC)=CC(OC)=C2)C=C1     | 0.24597  |
| BRKYBGNMHLZFKM  | CC1=C(C)C2=C(C=CC=C2)C(=O)NCCCN3CCOCC3)N      | 0.248916 |
| BROKBQPCAUXVOP  | CSC1=NC(N2CCOCC2)=C(CC3=CC=C(OC(C)C)C=C3)C    | 0.239626 |
| BSIIBCCVRXMNQU  | C1CC[N+](C1)(CC#CC2=CC=CC=C2)CC#CC3=CC=CC:    | 0.256301 |
| BTNXMDVVSFARFLG | OCCN(CCO)C1=CC2=C(C=CC3=CC=CC=C23)C4=C1C      | 0.251465 |
| BUFSPPRZEBZAIM  | CN(C)CCNC1=NC2=C(C3=C(CCCCC3)S2)C(=O)N1CC     | 0.249634 |
| BWJGIXLFNCIUSJ  | CN(C)C1=CC=C(C=C1)P(=O)(COC2=CC=C(C=C2))[N+]  | 0.249217 |
| BWPADOCCBNXFAX  | [O-][N+](=O)C1=CC=C(C=C1)C(=O)C[N+](=O)C      | 0.242521 |
| BWRDWZMTGISINW  | CCCCC1=CC=C(NC(=N)NC2=N Chem Div,4477-280     | 0.245996 |
| BWUREMXPYRLHH   | CC1=CC=C(CNC2=NC3=C(CS2)C=CC=C3)C=C1          | 0.243892 |
| BYFVAWVWHDPHGP  | CC1=CCCC2C(CN3CCCC3)C(=O)OC2C=C(C)CC1         | 0.276248 |
| BYIUAKQEWUPRQD  | FC(F)(F)C1=CC2=C(SC3=C(C=CC=C3)N2C(=O)CN4CC   | 0.239393 |
| CASXYKFSVICGKG  | COC1=CC=C(C=C1)C2=CC=C(C=C2)C(=O)C3CC3        | 0.250906 |
| CBBCXYFTKWGBGY  | COCCC\N=C(/S)N1CCN(CC1)C2=NC(=CS2)C3=CC(O     | 0.242312 |
| CCVGPSSIPPYTFZ  | COC1=CC=C(C=C1)C2=NN(C=C2C(=O)N3C4CCN(C)C     | 0.239189 |
| CDTKKVKZZGALS   | CC1=CC=C(CN2N=CC3=C2N=CN=C3NN)C=C1            | 0.240821 |
| CDUPTXNAHOCCGC  | COC1=C(OC)C(CNCC2=CC=C(SC)C=C2)=CC=C1         | 0.258411 |
| CEYHTCEQRVERQ   | CC1=C(CO\N=C(/C#N)C2=C(Cl)C=CC=C2Cl)C(=NO1)   | 0.23992  |
| CHGRYVDOMCDAOT  | CC1=CC=C(C=C1)\N=C2/SC3=C(CN2CCN4CCOCC4)      | 0.250226 |
| CINVZWPFSYWSJX  | CN(C)CCCN(C(=O)C1=CC=C(C=C1)S(=O)(=O)N(C)C2C  | 0.240131 |
| CIUKMZPIIFWZBP  | SC(=N\N=C(\C1=CC=CC=C1)C2=NC=CC=C2)N(CC3=     | 0.248271 |
| CIXVTQBZSGIERE  | COC1=C(OCC2=C(Cl)C=CC=C2)C=CC(CNCCN3CCOC      | 0.319475 |
| CJKPBSUQNAAOAI  | O=S(=O)(NCC1=CC=CC=C1)C2=CC=C(C=C2)S(=O)(=C   | 0.258834 |
| CKBPBVOQBKBRML  | CN(C)CCC(=O)C(CC1=CC=CC=C1)C2=CC=CC=C2        | 0.240612 |
| CKFKBFSZCBLKGT  | CN(C)CCCN(C(=O)C1=CC2=C(CCCC2)C=C1)C3=NC4:    | 0.255609 |
| CLOUJGMPFHDOX   | COC1=C(C=CC=C1)C2=NC3=C(C=CC=C3)C(=C2)C(=C    | 0.24031  |
| CLTJAEIXEDUHGG  | CC1CN(CCN1C2=CC=C(C)C=C2)C(=O)NC3=CC(=CC=     | 0.251023 |
| CNAPXSVYNCJBGH  | OC1=C(CN2CCN(CC3=CC=CC=C3)CC2)C=C(Br)C=C1     | 0.258066 |
| CNRGCQAEKZRVAQ  | COC1=C(C=CC=C1)N2CCN(CC2)C(=O)C3=C(C)C4=C     | 0.241572 |
| CQVBTZIRVOVNHJ  | O=C(CN1CCN(CC1)S(=O)(=O)C2=CC=CC=C2)NC3=C     | 0.246688 |
| CRPZJMIZBLMWCK  | C1CCN(CC1)C2=NC3=CC=CC=C3C4=C2C=CC=C4         | 0.247016 |
| CTHMZUGHOXRSPZ  | CCCC1=C(CC)C(N)=C2C=C(C)C=C(C)C2=N1           | 0.247874 |
| CUNGLMWGFPBDBG  | COC1=CC(O)=C(C=C1)C2=C(C(C)=NO2)C3=CC4=C(O    | 0.242813 |
| CUPVITJALNDBTF  | CCCN(CCC)C1=C2C=CC=CC2=NC(=N1)C3=NC=CC=C      | 0.24429  |
| CVRJHVAQAVRFMR  | CN(C)CCCN(C(=O)C1=CC=C(C=C1)S(=O)(=O)N2CCCC   | 0.238698 |
| CWLOYLAJKOSCN   | COC1=CC=C(C=C1)N2CCN(CC2)C(=O)CC3=CSC(NC:     | 0.245959 |
| CYHNHIXLALJCGX  | COC1=CC(=CC=C1)C(=O)NCC(N2CCC3=C2C=CC=C3      | 0.258374 |

|                 |                                                |          |
|-----------------|------------------------------------------------|----------|
| CZTLMENWYKDRIV  | CC1=C(C=CC(CI)=C1)\N=C(/S)NCCC2=CC=C(CI)C=C2   | 0.242948 |
| DALXANAQFPUVST  | CN(CC1=CC=C(C=C1)C(F)(F)F)C2=C(C=C(C=C2)S(=O)  | 0.252192 |
| DBYCDKBEVKWZNL  | NNC1=NC(=CC(=N1)C2=CC=CC=C2)C3=CC=CC=C3        | 0.240298 |
| DDCMMHFKQIPWRB  | CCOC(=O)CN1C=C(N=C1[N+](=[O-])=O)[N+](=[O-])=O | 0.24977  |
| DDEPXLQZTPGPRT  | FC1=CC=C(CN2C=C(CCN3CCS(=O)(=O)CC3)C4=C2C:     | 0.246374 |
| DEXCOBKOWPYHFL  | O=S(=O)(\C=C\C=C\S(=O)(=O)C1=CC=CC=C1)C2=CC:   | 0.240965 |
| DGJHXQSBRSJUQL  | CC1=C(C)C2=C(S1)N=CN=C2N3CCN(CC3)S(=O)(=O)(    | 0.241923 |
| DGLAWAKKMLEAPT  | OC(CSC1=C(CI)C=CC=C1CI)CN2CCN(CC2)C3=C(F)C=    | 0.281209 |
| DLWFEKNOTMFPDS  | CC1=CC=C(C=C1)C2=CSC3=C2C(NCCN4CCOCC4)=N       | 0.244188 |
| DMCGEDUQPQSKBS  | CC1=CC=C(SC2=C(C=C(CN3CCCC3)C=C2)[N+](=[O-]    | 0.261137 |
| DMFRUFZGJWUTPH  | ClC1=CC(NS(=O)(=O)C2=C(Br)C=CC(Br)=C2)=C(C=C1  | 0.256414 |
| DPMVOLXFUXSYFM  | O=C(CC1=CC=CC=C1)NCC2=CC=C(C=C2)N3C=CC=C       | 0.247482 |
| DQCQUKZQVRZXPQ  | COC1=CC=C(C=C1)N2CCN(CC3=C(O)C=C4CCCC4=C       | 0.249493 |
| DQFZMCBEFYMOEH  | ClC(\C=N\N1C=NN=C1)=C\C2=CC=CC=C2              | 0.243187 |
| DSRGSSHFKNBGB   | OCCNC1=C(C=C(C(=C1)N2CCCCC2)[N+](=[O-])=O)[N   | 0.239699 |
| DSTKAXBTHYRORR  | CCNS(=O)(=O)C1=CC=C(CCC(=O)N2CCN(CC2)C3=C(I    | 0.245618 |
| DTLUOQNGNUEEPA  | CC1=NN(C(NC2=NC3=C(C=CC=C3)N=C2)=C1)C4=CC      | 0.245045 |
| DUIITUKMHKGDFO  | CCN1CCN(CC1)C2=C3C=CC=CC3=NC(=N2)C4=NC=C       | 0.260907 |
| DVAUHDRQKGLXCV  | CC1=CC2=C(C=C1)N=C3CCCC3=C2NC4=CC5=C(OC        | 0.251805 |
| DWCJGYVSROLRDX  | CC1CCN(CC(O)CN2C3=C(CCCC3)C4=C2C=CC(C)=C4      | 0.247155 |
| DXFQOZH IWCKOFB | ClC1=CC=C(CSC2=NC=CN2CC3=CC=CC=C3)C=C1         | 0.244906 |
| FALDMNVTRFXNIT  | N=C1N(CCCN2CCOCC2)C=NC3=C1C(=C(N3CC4=CC        | 0.238794 |
| FBELSXQLSAVMRE  | CNC(S)=N\N=C\C1=CC=C(C=C1)C(C)C                | 0.238467 |
| FBGRTVMOJNNXSR  | CC1=NC2=C(OC3=C2C=CC=C3)C(=N1)N4CCN(CC5=       | 0.24069  |
| FBKVMQMNKXKDOJ  | NC(N\N=C\C1=CNC2=C1C=CC=C2)=NC3=CC=CC=C:       | 0.247782 |
| FESEYQAWPFCPT   | CN1CCN(CCCNC(=O)C2=CC=C(CSCC3=CC(CI)=CC=C      | 0.240524 |
| FEQSHWFAEKVGMW  | CCOC1=CC2=C(C=C1)N=C(S2)N(CCCN(C)C)C(=O)C3:    | 0.251793 |
| FIAOAIAXJRLEKI  | FC(F)(F)C1=CC(=CC=C1)N2CCN(CC3CC4CC3C=C4)C     | 0.260866 |
| FKIMWLJCPAASGO  | CC1=CC=C(C=C1)C2=NOC(CCC(=O)NCCCN3CCN(CC       | 0.244652 |
| FKPPLKWOEVXWOX  | COC1=CC(=CC=C1)N2CCN(CC2)C(=O)CN3C(=O)NC(I     | 0.248671 |
| FLDNBQIVOBCKJJ  | COC1=CC(OCC(O)CN2CCC(CC3=CC=CC=C3)CC2)=C       | 0.259112 |
| FLOVYJLTXSWHOB  | COC1=C(F)C(F)=C(C(=O)NC2=CC=C(C=C2)N3CCN(CC    | 0.251271 |
| FLZMETVYJNPQMX  | CCOC1=CC=C(C=NN=C(S)NC2=C(C)C=CC=C2)C=C1       | 0.249328 |
| FMKZPYAVQWBLSF  | COC(=O)C1CC2=C(NC3=C2C=CC=C3)C4(CCN(CC5=C      | 0.242341 |
| FQMNXKJTBWHTO   | CC1CC(C)CN(C1)C2=CC(CC(C)(C)C2)=[N+]3CCCC3     | 0.24274  |
| FRBOSQJLOCHVIY  | COC1=CC(OC)=C(NC2CCN(CCC3=CC=CC=C3)CC2)C:      | 0.249057 |
| FRIIXSFULMALB   | O=S(=O)(CC(CN1CCCCC1)N2CCCCC2)C3=CC=CC=C:      | 0.252818 |
| FSSMNMJYMDGYBK  | CCCCN=C1N=C(S)N(C2=CC=CC=C2)C(C)=C1C(C)=O      | 0.244951 |
| FUGFLZGGLPTLSE  | CC1CCN(CCCOC2=C(C=CC=C2)[N+](=[O-])=O)CC1      | 0.255591 |
| FUXHOSSLOMXVJP  | CC[C@H](C)[C@H]1CNCCN1CCC2=CC(=CC(=C2)(        | 0.24793  |
| FVCSHCORWAOAEB  | CC1C(C)N(C(=O)CCl)C2=C(C=CC=C2)N1C(=O)CCl      | 0.251725 |
| FYBPVKZVCGENMO  | COC1=CC2=C(SC(=N2)N(CCCN(C)C)C(=O)C3=CC=C(I    | 0.254923 |
| FYQPQRIFFTINR   | CC1=CC2=C(NC(=N2)C3CCCN(C3)C(\S)=N\C4=C(C)C    | 0.238614 |
| GAIRREYVAQANTA  | CCCCCCCN1C(=N)N(CC(=O)C2=CC=CO2)C3=C1C=C       | 0.244677 |
| GANLGRNROBRFHX  | CCCCCCCN1C(=N)N(CC(O)C2=CC=CO2)C3=C1C=CC       | 0.240287 |
| GAPPGYVPJUGIHP  | C\C(=N/N=C(S)SCC1=CC=CC=C1)C2=NC=CC=C2         | 0.2526   |
| GASXTRAPCWRQAH  | CC\N=C(/S)N1CCN(CC1)C2=NC(=CS2)C3=CC(OC)=C     | 0.259376 |
| GBPRGJDUEMKMOK  | CC1=C(OCCNC(S)=NC2=CC=CC=C2)C=CC=C1            | 0.25386  |

|                 |                                               |          |
|-----------------|-----------------------------------------------|----------|
| GBQCHUUUTXAHAS  | FC1=C(CN2CCC(CC3=CC=CC=C3)CC2)C=CC=C1         | 0.239105 |
| GCEIBLLNWJRDPK  | FC(F)(F)C1=CC(=CC=C1)N2CCN(CC2)C(\S)=N\CC3CC  | 0.243729 |
| GCNZGZROTNFCTM  | CN1C(=N)N(CC(=O)C2=CC=CC=C2)C3=C1C=CC=C3      | 0.249861 |
| GDIRMWOXEPARKY  | CN(C)C1=C(C=C(C=C1)\C=N\N=C(N)N)[N+](([O-])=O | 0.264454 |
| GDPSFDWQTOIHIX  | CC1=CC(C)=NC(=N1)N(CCOC2=CC=C(Cl)C=C2)C#N     | 0.248629 |
| GDRWQEOJSGTFNQ  | CC(N)CC1=CN(CC2=CC=CC=C2)C3=C1C=CC=C3         | 0.248511 |
| GEMARUXNGYWZLQ  | COC1=C(OC)C=C(C=C1)C2CC(=NN2C3=CC=CC=C3)C     | 0.238929 |
| GGHXKKZQNZKZCW  | NC(N\N=C\C1=CC=C(Br)C=C1)=N\N=C\C2=CC=C(Br    | 0.252097 |
| GHJPBLCHQJHST   | CN(C(C1=CC=CC=C1)C2=CC=CC=C2)C(\S)=N\C3=CC    | 0.240522 |
| GHODQHWTFMVZTK  | OC(=NOC(=O)C1=CC=CC=C1)C2C3CC(C=C3)C2C(O):    | 0.24691  |
| GHONBSJAWLVFJJ  | COC1=CC(=CC=C1)C2=NN3C(=C2)N=C4CCCC4=C3       | 0.243534 |
| GKJOALAKKFHGH   | COCCN(CCOC)C1=C2C=CC=CC2=NC(=N1)C3=CC=C(C     | 0.23867  |
| GLUWQMOOSFQALM  | CC1=NN(CC2=C(Cl)C=CC=C2)C3=C1C=C(S3)C(=O)N    | 0.25364  |
| GMQRKHSIRSGZOM  | CCNC1=NC(N\N=C(/C)C2=CC=C(OC)C=C2)=NC(NCC     | 0.24387  |
| GMSMBWMTBLESFN  | CC1=CC(NP(=O)(OC2=CC=CC=C2)OC3=CC=CC=C3)=     | 0.243246 |
| GOZIJUKIJBIAGS  | CCOC(=O)C1(CCN(CC2=CC=C(C)C=C2)CC1)S(=O)(=O   | 0.290491 |
| GPIDCJLWCBZGQE  | CN(CCCNC(=O)CS(=O)(=O)CC1=C(C)OC(=N1)C2=C(F   | 0.24684  |
| GPMDFBYMHJZBTF  | FC(F)(F)COC1=NC(=NC(=N1)N(C2=CC=CC=C2)C3=C(C  | 0.247497 |
| GQPPEZBDSBAORQ  | CN1CCN(CCOC2=C(C=C(C)C=C2)[N+](([O-])=O)CC1   | 0.242559 |
| GQTPRLWQZDUWKJ  | CC1CC(O)C=C(C)CCC=C(C)CC(O)C2CC1OC(=O)C2=C    | 0.245148 |
| GRBXMROQYUPWNC  | CC1=CC=C(NS(=O)(=O)C2=CC(=CC=C2)C(=O)NC3CC1   | 0.242855 |
| GRLRRRSNDWCBML  | CCN1C(C)=C(C)C2=C1C=CC(=C2)C(=O)NCCCN3CCCC    | 0.257058 |
| GRTZXYPGLGOPL   | C1OC2=C(O1)C=C(C=C2)C3=NC4=C(N3)C=CC=C4       | 0.243044 |
| GSDPWYVVVAWAJZ  | CCOC1=CC=C(C=C1)N=C(S)N(CC2=CC=CO2)CC3=CC     | 0.243829 |
| GTHQDOILWCWUMQ  | CCOC(=O)C1=C(C)C2=C(O1)C=CC(CNC3CCCC3)=C:     | 0.254931 |
| GUAYXBOHGZCCLV  | CCOC(=O)C1=CC(=NC2=C1SC(=N2)N(CC)CC)C3=CC:    | 0.240767 |
| GVIRQIICSFDKFT  | CSC1=C(OCC2=CC(=NO2)C(=O)N3CCN(CC3C)C4=CC     | 0.251824 |
| GVTRMONEEFLKOO  | CCOC1=C(OCC2=C(F)C=CC=C2)C(Br)=CC(CNCCSC3=    | 0.272622 |
| GVUMMKJZZLDOJB  | CN(C)CCCNC(=O)COC1=CC(C)=C(Br)C(C)=C1         | 0.24314  |
| GWAVODRMPDBYNC  | OC1(=O)(=O)=O.CC1=CC=C(C=C1)C2=CC(C3=CC=C(C   | 0.242569 |
| GWBUAFKAMVXNPW  | CCOC(=O)C1=CC2=C(C=C1)N(CC)C(COC3=CC4=C(C:    | 0.26049  |
| GWHJFGPDVVLVBPL | COC1=C(OCC2=C(F)C=CC=C2)C(CNCCC3=CNC4=C3      | 0.240128 |
| GXDYIGGSLLQOSL  | CNC(S)=NC1=CC=C(C=C1)C2(CCCCC2)C3=CC=C(C=C    | 0.24061  |
| GXTKJIKDRWVCSN  | COC1=C(OC)C=C(C=C1)C2=NC(=C(N2)C3=CC=CC=C:    | 0.2428   |
| GZHJDXCKHQLJST  | COC1=C(C=CC=C1)C2=NC(N=C2C)C3=CC=C(F)C=C3     | 0.24945  |
| GZHYISGBALYJAE  | C\C(CC(C)(C)C1CCCC1)=N/N ChemBridge,56490:    | 0.245806 |
| GZRSQMRGRMVOML  | CC1=[N+](CC2=CC=CC=C2)C3=C(C=CC=C3)N1CC4=     | 0.248847 |
| GZUJTINYQUYPAL  | CO\N=C(/CS(=O)(=O)CC1=C(Cl)C=CC=C1)C2=C(Cl)C: | 0.241248 |
| HAMZZMBVWRGPBJ  | CCN1CCCC1CN(CC2=CC3=CC=C(C)C=C3NC2=O)C(\      | 0.255605 |
| HARBGVJRGOLCBC  | CN(C)CCNC1=C2CCCC2=NC3=C(C(C)=NN13)C4=C       | 0.261083 |
| HAWMIBLMDHZFKN  | CN(C1CCCC1)C(\S)=N\C2=CC=C(OC3=CC=CC=C3)C     | 0.24415  |
| HBDAYDNADGUJSK  | CCC1=CC2=C(C=C1)N=C(S2)N(CCCN(C)C)C(=O)C3=C   | 0.240651 |
| HBIXGQWYCSADMV  | CC(\C=N\N1CCN(CC2=CC=CC=C2)CC1)=C/C3=CC=C     | 0.239198 |
| HCHIBSZBHRTYPN  | CC1=C(C)C=C(C=C1)N2CCN(CC2)C(=O)N3CCOCC3      | 0.241626 |
| HCNCHPUSRLRNJS  | C\C(=N/N=C(S)N1CC2CCC(CC2)C1)C3=NC=CN=C3      | 0.248035 |
| HDBULXQOJUCQLD  | CC(C)OC(=O)C1=CN=C(C=C1)N2CCN(CC2)C3=C(F)C:   | 0.245399 |
| HESDAJYAHONPSE  | OC1=N/C/C=C/C2=C/C=C\C(OCC=C)=C/2)=N\C3=C     | 0.24716  |
| HFXFDAATZIEGHQ  | CN1N=NN=C1SCCNCC2=C(OCC3=CC=CC=C3)C=CC(       | 0.256254 |

|                  |                                               |          |
|------------------|-----------------------------------------------|----------|
| HGSRDXHNGMLSSA   | CN(C)CCCN(C(=O)C1=CC=C(C=C1)S(=O)(=O)N(C)CC2  | 0.25369  |
| HITBEPQTTWWGIFI  | COC1=CC=C(C=C1)C2=C(C#N)C(=NC(=N2)C3=CC(C):   | 0.241214 |
| HIZIGRVGOMXQPT   | C(N1CCN(CC2=CC3=C(C=CC=C3)C=C2)CC1)C4=CC=     | 0.244768 |
| HJVIUZHNRJYUTG   | COC1=CN=C(C=C)C2=C1C3=CC=CC=C3[NH]2           | 0.247243 |
| HKHVMNDUQXYNBE   | OC(CNC1=C2C=CC=CC2=NC(=N1)C3=CN=CC=C3)C4      | 0.245378 |
| HLNNKQLCUWHCKE   | NC1=C(C=C(C#N)C(=N1)N2CCN(CC2)C3=NC=CC=C3     | 0.244638 |
| HLQFMKXVPCAVOZ   | CCN(CC)CCNCC1=C(OCC2=C(F)C=CC=C2)C=CC(Cl)=    | 0.297131 |
| HMVBHXZQCYGYHH   | CC(=O)C1=CC=C(C=C1)S(=O)(=O)N2CCN(CCOC3=CC    | 0.239774 |
| HNGIURSRGBTUKQ   | CCCCNCCOCCOC1=C(C=CC=C1)C2=CC=CC=C2           | 0.246513 |
| HONMOBIEAAPGC    | BrC1=CC=C(CNC2=NC3=C(C=CC=C3)N2CCN4CCCC       | 0.249366 |
| HOVJAXXECPOCKW   | CN1CCN(CC1)C(=O)CCCN2C(=S)S\C(=C/C3=CC=CC=    | 0.248739 |
| HOZQYTNOQZBRCS   | CN1CC[C@H]2[C@@H](C1)C3=C(C=CC(C)=C3)N2S      | 0.24631  |
| HQFMIOZYIHXA     | O=C1N(CCN2CCCC2)C3=C(C4=C(CCCCC4)S3)C(=C      | 0.255787 |
| HRLXLJKVPAVREE   | CC1=NC2=C(S1)N(CCN3CCCC3)C4=C2C=C(Cl)C=C      | 0.2554   |
| HVMUWHZAZGTMJK   | CN1C=NC2=C1C(Cl)=NC(Cl)=N2                    | 0.255414 |
| HVSPWFLNYUPLJA   | COC1=CC=CC2=C1N=C(S2)N(CCCN(C)C)C(=O)C3=C(    | 0.241245 |
| HWFVHZCQEAUGJY   | CCOC(=O)C1=CC=C(N\C(=N/S(=O)(=O)C2=C(C)C=CC:  | 0.280309 |
| HWKCJOOJJUUWFA   | CC(C)(C)C1=CC=C(OCCNCC2=CC=CC=C2)C=C1         | 0.246489 |
| HWPVZTDNLUJHLN   | C1CN(CCN1\N=C\C2=NC=CC=C2)C3C4=C(C=CC=C4      | 0.28263  |
| HXNWDPAZQILIRT   | O=C(N\N=C\C1=CC=CC=C1)C2=NC=CC=C2)C3=CC=      | 0.240343 |
| HXWRRNFFOQYTF    | CC1=NC(=CC=C1)\N=C(/S)NC2=CC=C(OC3=CC=CC=     | 0.241556 |
| HXWVJOJFQXWXFE   | CCCC[C@H](CN[C@@H](CNC)[C@H](C)CC)NCCC1:      | 0.238683 |
| HXYZFUQPQOAXCW   | CCCCN(CC)C(\S)=N\C1=CC=C(C=C1)N=C(C=C2)N:     | 0.240003 |
| HYAAMKCMNGCQSE   | CC1=CC(=CC(C)=C1)C(=O)NC2=CC=C(NC(=O)C3=CC:   | 0.247619 |
| HYEHHPSWLBIMKF   | BrC1=CC(=CC=C1)C(=O)NCC2(CCCC2)C3=CC=CC=C:    | 0.240276 |
| IBSYIUYMCKJKTNI  | BrC1=CC=C(NS(=O)(=O)C2=CC(=CC=C2)C(=O)NC3CC   | 0.24767  |
| ICZZTNOOMSQNCH   | CC1=C(C)C(OC2=NC=C(C=N2)C3=CC=C(Cl)C=C3)=C(   | 0.239346 |
| IDIBHZDYXUVINB   | CCC1(ON(C1=O)C2=C(Br)C=CC=C2Br)C3=CC=CC=C:    | 0.242542 |
| IDPUFKCIPCGYIL   | OC(CC1CC12C3=C(C=CC=C3)C4=C2C=CC=N4)(C5=(     | 0.239604 |
| IFHMUNAIFQSUDX   | CC1=CC=C(C=C1)C(=O)CN2C=C(C3=CC=C(C)C=C3)[N   | 0.246793 |
| IGVFFEWTONRZIO   | CCCN1C(C)=NC2=C1C=C(N3CCN(CC3)C4=NC(=CS4)     | 0.240387 |
| IIIQJAKHUZXUHB   | CC1=CC=C(SCCN(C)S)=NC2=C(C)C=CC(C)=C2)C=C1    | 0.252163 |
| IINYNPFZSWDMKO   | CCN(CC)CCSC1=NC2=C(C=CC=C2)C(=S)N1C3=CC=C     | 0.25934  |
| IJAMBXTZXRKPN    | CC1=NN(C(NC2=C(Cl)N=C3C=CC=CC3=N2)=C1)C4=     | 0.243722 |
| IJEBYZKDEQWNC    | CCN1CCN(CC1)C2=C(NC(=O)COC3=C(Cl)C=CC(C)=C    | 0.243455 |
| IJLFPQDXCYIPKB   | COC1=C(C=CC=C1)\N=C(/S)N2CCN(CC2)C(C3=CC=C    | 0.243529 |
| ILOMPUSPHRMHIA   | FC1=CC=C(C=C1)N2C(CC3=CC=CC=C3)=NN=C2SCC.     | 0.247291 |
| IMCTTYPKPVYSTH   | FC1=CC=C(NC(=O)C#CC2=CC=CC=C2)C=C1            | 0.24821  |
| IMQWZNFAGK POT   | CCCS(=O)(=O)NC1=CC(=C(C=C1)N2CCCC2)S(=O)(=    | 0.253413 |
| INFUTCKSYWEKNB   | COCC(C)NC(=O)CSC1=NC=C(C( Enamine, T5231205   | 0.249535 |
| IOLHLRYDZRF SJM  | COC1=CC=C(C=C1)N2CCN(CCCNC(=O)C3=CC4=C(C:     | 0.241928 |
| IPBRVYOVATUEHJ   | CC1=CC=CC=C1C2=NC(=C(NCCN3CCOCC3)O2)S(=C      | 0.258273 |
| IPIFRBxBBIBXHI   | CC1=C(OCCCCN(C)(C)C)C=CC(Br)=C1               | 0.271454 |
| IPURTGGCIASEME   | CC(C)NC(NCC1=C(Cl)C=C(Cl)C=C1)=NC2=CC=CC=C2   | 0.240724 |
| IQNAWOZPXCRDHI   | CCN1CCN(CC1)C2=NC3=C(C=C(NC(=O)C4=CC=CS4)     | 0.244411 |
| IRBACGKLN DLBLX  | CC1=C(C(=O)OCCOC2=C(C)C=CC=C2)C(=NO1)C3=C(    | 0.247156 |
| IRCTUCGANJLJNZ   | CC(C)NCC(O)COC1CCC(CC1)C(C)(C)C               | 0.25426  |
| ITGNZSJYGD PB MN | CCN1CCN(CC1)C2=CC=C(NC(- Vitas-M Laboratory,' | 0.240915 |

|                 |                                              |          |
|-----------------|----------------------------------------------|----------|
| ITGWHCJBHDFZBN  | CCCN1CCN(CCCNC(S)=NC2=CC3=C(C=C2)N=C(C=C:    | 0.248948 |
| IUENWZALYXA EGL | CN(C)C1=CC=C(NC(=S)N(CCC2=CC=CC=C2)C3CC=C    | 0.238609 |
| IUZQRMQBYP SNOP | CCCCN1C(NCC2=CC3=C(OCO3)C=C2)=NC4=C1C=C      | 0.242351 |
| IVTVJPLZMWA ZDG | CCN1CCN(CC1)C2=C(Cl)C=C(NC(=O)C3=CC(F)=CC=C  | 0.244352 |
| IWAQYICUTFQLPL  | CCOC(=O)C1=C(SC2=C1CCCC2)N3C(C)=CC(C=O)=C    | 0.258475 |
| IWBVPWPPANA UJF | CC1=CC(C)=NN1CCCN2CCC(CC2)C(=O)NC3=CC(=CC    | 0.24587  |
| IXDMDZYRFMQNAZ  | COC1=C(OC)C(OC)=C(CN2CCN(CC2)S(=O)(=O)C3=C   | 0.241046 |
| IXEJOJCKIOCKJP  | COC(=O)C1=C(C[C@H]2CC[C@H]1N2C(=O)NC3C       | 0.24375  |
| IZCJMEWSRTWZMW  | CCN(CC)C1=NC2=C(C=C(NC(=O)C3=CC=C(Br)O3)C=C  | 0.251794 |
| JAIFWJBLUVGTN   | CC1=CC=CC(C)=C1NC(=O)C2=CC=C(CN3CCC4=C(C3    | 0.287829 |
| JAVKUZLFYJVUCI  | CC(C)(C)C1=CC=C(OCCC(=O)NC2=C(C=C(C=C2)N3C   | 0.239309 |
| JBSPVQWXYLGO FN | CC1CCCN(CCOC2=CC(OC3=CC=CC=C3)=CC=C2)C1      | 0.265656 |
| JCJSOROVNUFQFY  | NC1=C(C=CC=C1)C#CC2=CC=C(C=C2)[N+][O-]=O     | 0.283265 |
| JEMZTFFTDNRKRS  | CC1=CC(N2CCN(CC2)C3=NN=NN3C4=CC=CC=C4)=      | 0.238868 |
| JGQSQTHHVYQNZ   | C1CN(CCN1)N=C\C2=CN=CC=C2)C3C4=C(C=CC=C4     | 0.242869 |
| JHIDMNKFGHQ TND | COC1=CC=C(C=C1)C2=NOC(=N2)C3=C(C=CC=C3)C4    | 0.242429 |
| JIFCJGRLNKKNO   | CC1=CC(=CC=C1)N2C=C(CNCCC3=NC(C)=CC(C)=N3    | 0.24467  |
| JKDLOGLNPDVUCX  | CC1=C(N2CC2)C(=O)C(CO)=C(N3CC3)C1=O          | 0.250889 |
| JKMMTFLYXNGCTP  | CC(C)(C)NC1=NC(=NC(=N1)N2CCCC2)N3CCCC3       | 0.295199 |
| JLOWBNWESRIHFY  | CN(C)CC1=C(SC2=C(Cl)C=C(Cl)C=C2)C=C(F)C=C1   | 0.253444 |
| JMBDCADTM YGNQO | COC1=CC2=C(C=C1)N=C(N\N=C(/C)C3=NC=CC=C3)    | 0.246816 |
| JMUQRGSDGTX YBZ | OC1=CC=C(C[C@H]2CN=C(S)N2C[C@H]3CCCN3C(C     | 0.239684 |
| JMWYNZLUZZSLNI  | CCN(CC)CCNC(S)=NC(=O)C1=CN(N=C1C2=CC=C(OC    | 0.240686 |
| JMYQPHVQYYQNOG  | CC1CCCC(C)N1CC(O)COC2=C(F)C=C(Br)C=C2F       | 0.256946 |
| JNRDKMLQIYZVBV  | FC1=C(CN2CCN(CC2)C3=NC4=C(S3)C=CC=C4)C(Cl):  | 0.242399 |
| JRIKLERLKODIGN  | CC(C)C1=CC=C(OCCC2=C(C)NN=C2C)C=C1           | 0.244843 |
| JSTHCNBJOWNOBT  | O=C(NC1=CC(=CC=C1)N2C=CC=N2)C3CCCN(CC4=C     | 0.242008 |
| JTGNGCIGAYRRAG  | CC1=C(C=CC=C1Cl)\N=C(/S)N2CCCN(CC3=C(F)C=CC  | 0.24166  |
| JVFUNOJJRFQCJP  | CC(C)(C1=CC=CC=C1)C2=CC=C(OCCCNCC=C)C=C2     | 0.257874 |
| JWDKDEOZWRNCJP  | COC1=CC(=CC(OC)=C1OC)C2=CC(C(=O)NC3=C(OC)C   | 0.298189 |
| JWQJZUUTXPAMDH  | COC1=CC(CN2CCN(CC3=CC=C(C=C3)C(F)(F)F)CC2)=  | 0.239327 |
| JXSYVEMDOJHZNA  | CC1=CC(C)=C(C=C1)C(=O)NC(S)=NC2=CC=C(CN3CC   | 0.248124 |
| JYDNZIKPNQPVLU  | CC1=CC(C)=C(CN2C=NC(=C2)C3=CC=C(C=C3)[N+][O- | 0.241776 |
| JYWQNPPIDJENSS  | CNC(=O)OCC1=C(COC(=O)NC)N(C)C(SSC(C)(C)C)=N1 | 0.245017 |
| JZCVNTHDAGQJFQ  | CC1CCN(CC(=O)C2=C(C)N(C(C)=C2)C3=CC=C(F)C=C: | 0.2416   |
| KAZKIRQPJHCOPZ  | CCOC1=C(OCC2=CC=CS2)C(Br)=CC(CNCCO)=C1       | 0.294901 |
| KBUIURUSSHIMGT  | ClC1=CC(\C=N\N2CCN(CC3=CC=CC=C3)CC2)=CC=C    | 0.243531 |
| KBXMQGWYLAULEO  | CCN(CC)C1=NC(=NC(=C1)C(F)(F)F)C2=NC=CC=C2    | 0.265827 |
| KBXOFUBAOLRVGO  | CCN(CC)CCCNC(=O)C1=CC2=C(S1)C3=C(C=CC=C3)N   | 0.243599 |
| KCZCJQZQLKECEE  | CCOC1=CC=CC2=C1N=C(S2)N(CCCN(C)C)C(=O)C3=C   | 0.245055 |
| KDUQFKQFOXKDG D | COC1=CC=C(C=C1)C2=C(C)NN=C2C3=C(O)C(C)=C(O   | 0.241444 |
| KDWDAFPKFGQPMO  | CCN1C(COC2=CC=C(Cl)C=C2)=NN=C1SCC3=NC4=C     | 0.250622 |
| KECRXLZQHIYBOU  | CC1CCCN1C2=C(N=C(S2)S(C)(=O)=O)S(=O)(=O)C3=  | 0.239469 |
| KEDNXCYSCLGKU   | COCC\N=C(/S)N1CCN(CC1)C2=NC(=CS2)C3=CC=C(C   | 0.24491  |
| KELRDBMULRYLAZ  | COC1=C(OC)C=C(C=C1)C2CCCN2\C(S)=N\C3=C(C)C   | 0.2389   |
| KFEUHMSTVKWZAL  | COC1=CC(OC)=C(OC)C=C1C(=O)C(=C)CN(C)C        | 0.255135 |
| KFNHMGQTOQVWQC  | CC1=C(NC(=O)CN2CCC(CC2)C(O)(C3=CC=CC=C3)C4   | 0.251142 |
| KGCUCBMHEBZAAR  | CCOC1=C(C=C(CN(CCC)CC)C)C=C1)C(=O)OC         | 0.258968 |

|                 |                                               |          |
|-----------------|-----------------------------------------------|----------|
| KGEZINBWNGJLSR  | CCOC1=C(OCC2=C(F)C=CC=C2)C(Br)=CC(CNCC3=CC    | 0.245798 |
| KITYONMJHHLPCF  | COC1=CC2=C(C=C1)C=C(N=C2)C3=C(F)C=CC=C3       | 0.241012 |
| KKSZVUGVKVEOAK  | COC1=C(C=CC=C1)C(C[N+](O)=O)C2=CNC3=C2C=      | 0.244857 |
| KTPBMRRITWYSQL  | [O-][N+](=O)C1=C(C=CC(=C1)C(=O)N2CCN(CC3=CC=  | 0.238782 |
| KTRMCWILXYBTEP  | COC(=O)C1=C(OCCC(C)C)C=CC(CSC(N)=N)=C1        | 0.246335 |
| KUTCXVUIOVBICM  | CN1CCN(CC2=C(O)C=CC3=C2C(=CO3)C(=O)C4=CC=     | 0.239865 |
| KYIAUZRDCLQACY  | CCC1=CC(CNCCNCC2=C(O)C=CC(CC)=C2)=C(O)C=C:    | 0.249759 |
| LAANVYLBPQYPTP  | CC(O)CNCNCC1=C2C=CC=CC2=CC=C1OCC3=CC=(        | 0.256271 |
| LBNKQGYGRTRRD   | CC(=O)C1=CC=C(NC2=C3C=C(C)C=C(C)C3=NC(C)=C:   | 0.239888 |
| LCFWFLDEKVUPBD  | CN(C)CCCNC1=NC=NC2=C1C(=CN2C3=CC=CC=C3)(      | 0.246811 |
| LDOKEGXRBPYRMH  | COC1=CC=C(C=C1)C2=NN3C=NN(CC(=O)NCCCN4C       | 0.238992 |
| LDUYFILRMTVKOD  | COC1=CC=C(C=C1)C(N2CCN(CC2)C3=CC=CC=C3)C4     | 0.241215 |
| LGFPCLMEHARZNY  | CCCCN(CC(O)COC1=CC(C)=CC=C1)CC(O)COC2=CC(     | 0.245166 |
| LGUOGKPIPWKSHA  | CCOC1=C(OCC2=CC=CC=C2)C=CC(CNC3=CC=C(CNC      | 0.238487 |
| LGZSGCSPVHESJN  | CCOC(=O)CN1C(=NC(=C1C2=CC=CC=C2)C3=CC=CC:     | 0.244604 |
| LHILIMCFIJCSHA  | C(NC1=NCCN1)C2=C(SC3=C4C=CC=CC4=CC=C3)C=      | 0.24399  |
| LHMWCEVVOVBYIR  | OC(COCCC12CC3CC(CC(C3)C1)C2)CN4CCCCC4         | 0.269473 |
| LIAIKEXLWCJQDH  | CC(C)NCCOCCSC1=CC=C(CI)C=C1                   | 0.252018 |
| LJJRLLVBPWZLT   | COC1=C(Br)C=C(C=C1)C(=O)NC2=C(C=CC=C2)N3CC    | 0.244091 |
| LKPOXZKRWJOAIR  | CNC(S)=NC1=CC(=CC=C1)C2=NC3=C(C=CC=C3)N=C     | 0.240411 |
| LLABXOYGKIUMRT  | FC(F)(F)C1=CC(CI)=C(N=C1)N2CCCN(CC2)C(\S)=N\C | 0.244024 |
| LMDLYWVZOYMTET  | CCOC1=CC=C(CSCCNC(S)=NC2=CC=C(OC)C=C2)C=C     | 0.24042  |
| LMMAFKCGZFAZEO  | COC1=C(OC)C=C(\C=N\OCC(=O)NC(C2=CC=CC=C2)(    | 0.256539 |
| LOGCDTPZMHGKMP  | COC1=CC=C(C=C1)N2C(COC3=C4C=CC=CC4=CC=C:      | 0.272134 |
| LONMBINMTRDROA  | FC1=C(OCCCCCN2CCCC2)C=CC=C1                   | 0.278776 |
| LPHZYWPMOGWFEC  | SC(=NC1=CC=CC(Br)=C1)N2CCN3C=CC=C3C2C4=C      | 0.241593 |
| LRCLIANPNGHBFMA | CN(CC(=O)NC1=CC(F)=CC=C1)CC(=O)NC2=CC(=CC=    | 0.24794  |
| LTJWZEHNLIIVCEG | CC1=CC(=CC(C)=C1)N=C(S)NC2CC3CCCC(C2)N3CC     | 0.263803 |
| LUMYCUHRVRSNFU  | C\C(=N/NC1=NC(=CC(C)=N1)C2=CC=CC=C2)C3=CC:    | 0.247445 |
| LUURBQJWILSPPZ  | CCN(CC)C1=NC=NC2=C1C(=CS2)C3COC4=C(O3)C(      | 0.245265 |
| LWHZXTWETGZAPA  | C(N1CCOCC1)C2=C3C=CC4=CC=CC5=C4C3=C(C=C:      | 0.245078 |
| LXSKJZACELIGDN  | CC(=O)N1CCN(CC1)C2=CC=C(OC3=CC(=C(C=C3))[N+   | 0.239359 |
| LYANQLBZUJALFT  | COC1=C2N=C(C)C=C(NC3=C(C)C=CC=C3)C2=CC=C1     | 0.239763 |
| LYESBOJVXBJVBZ  | NCCNC[C@@H]1COC2(CCCCCCCCCC2)O1               | 0.24317  |
| LYIUREYWAKPINL  | C\C(=N/N=C(S)N1CCCCC1)C2=NC=CC=C2             | 0.25581  |
| MBUIARAVKHOPSP  | ClC1=CC(CI)=C(CN2C3=C(CCCC2=O)C=CC=C3)C=C1    | 0.242927 |
| MEDNNPLNMHHDHL  | CCN1CCN(CCCNC(=O)C2=CSC3=C2CCCC3)CC1          | 0.249148 |
| MFELZSOBTNRDDQ  | FC1=CC=C(CN2CCC(CC2)C(=O)N(CCC3=CC=CC=C3))    | 0.24431  |
| MFGGANWOTSXZQA  | COC1=CC(C)=C(C=C1)C(=O)C2CCCN(CC3=CC=CN3C     | 0.24396  |
| MIZYLCBOZXMRKC  | COC1=CC=C(C=C1)C2=NC3=C(C=CC=C3)C(NCCCN(C     | 0.242413 |
| MJUBMNNENZFDBB  | NC1=NC(NC2=CC=CC=C2)=NC(CSC(=S)N3CCN(CC3)     | 0.255684 |
| MKZLUAVLJPHTCA  | COC1=C(C=C(CI)C=C1)C(=O)C2CCCN(CC3=CN=C(C):   | 0.244612 |
| MNEUHRLPCBNVQP  | NNC1=NC(=NC(NC2=CC=CC=C2)=N1)N3CCCCC3         | 0.241306 |
| MNVFUIZSSLMYRD  | CCOC1=C(CNCCNCCO)C=C(CI)C=C1Cl                | 0.240959 |
| MOWXKVLGLKIYPZ  | CC1=CC(OCCCCN2C=CN=C2)=C(C)C=C1               | 0.282184 |
| MROUMGHYRREOGE  | COC1=CC(\C=C2\SC3=C(NC2=O)C=C(C=C3)C(=O)NC    | 0.249325 |
| MRYPRGFFMVYDJW  | COC(=O)C1=CN(CC2=CC(OC)=C(OC)C=C2)C=C(C1C3    | 0.239912 |
| MTKWLELVFSBWIP  | CCC1=CC=C(C=C1)C(CNC2=C3C=CC=CC3=NC(=N2)(     | 0.242766 |

|                |                                               |          |
|----------------|-----------------------------------------------|----------|
| MVNJVZVXVJTEKU | CN(C)CCCN(C(=O)C1=CC=C(C=C1)S(=O)(=O)N2CCCC   | 0.240783 |
| MVXZVUIEUSJAIH | CN(C1=CC=C(C=C1)C(=O)N2CCN(CC3=CC=C4OCOC      | 0.243333 |
| MXEAGZWZLNDZPO | CC(C)C1=CC=C(OCC(O)CNC(C)C2=CC=CC=C2)C=C1     | 0.258284 |
| MXJYBHVYFCOGNA | CCN(CC)S(=O)(=O)C1=CC(NC(=O)C2=CC=C(C=C2)N3   | 0.240819 |
| MYCMIKJKPAZFJD | COC1=CC=C(C=C1)N2CCN(CC2)C(CNS(=O)(=O)C3=C    | 0.247104 |
| MYJSZVZCIZXXGZ | CC(C)C1=C(NC(S)=NN(CC2=CC=CC=C2)C3=CC=CC=C    | 0.24939  |
| MZFVOAWLTVMEPG | CCN(CC)S(=O)(=O)C1=CC(=C(C=C1)N2CCN(CC2)C3=   | 0.243228 |
| NAACUODJWGVTLU | CN1CCN(CC1)C(=O)\C=C\C2= Enamine,T0508-118    | 0.262658 |
| NAHGSCRAUMNHIA | CC1CC(C)CN(CCCSC2=CC=CC=C2)C1                 | 0.244583 |
| NAUVDUAFMRTQQN | CC1=CC=C(NC2=C3CCCC3=N( Chem Div,3130-153     | 0.242692 |
| NBJSYTGLGDBHFD | C(NCC1=CC=C(OCC2=CC=CC=C2)C=C1)C3=CC=CS3      | 0.239236 |
| NBLBHHZNRGQSQN | COC1=C(NC(=O)NC2=NC(CC(=O)N3CCN(CC3)C4=CC     | 0.238996 |
| NCGHKOPCIZUFJ  | CCOC1=C(NC(=O)C2=CC(NC(=O)C3CCCC3)=CC=C2)C    | 0.253609 |
| NCRALVTUDQJLGN | CC1=C(CN2CCC(CC2)C(=O)NC Chem Div,C522-089    | 0.25194  |
| NDCGYKFGYLNZCW | COC1=C(OCC(=O)NC(C)(C)C)C=CC(CNC(C)C23CC4C    | 0.240674 |
| NESFIPBVVKVOMY | CCN(CC1CCCN(CCC2=CC(F)=CC=C2)C1)C(=O)C3=CC    | 0.242793 |
| NFSMEYMZCSXINM | COC1=CC=C(C=C1)C2=NC(=NC(=C2)C#N)N3CCNCC:     | 0.247035 |
| NGGRXCCACIAMPB | CCN(CC)C1=CC=C(NC(=O)NC2=CC=CC=C2)C=C1        | 0.249869 |
| NJMAOFNJCLSNQY | COC1=CC=C(OC)C=C1)C2=C(C#N)C(N)=NC(=C2)C3=    | 0.241555 |
| NKZYWBMSMZJJKO | CCCOC1=C(C)C=C(CCCN=C(N)N)C=C1                | 0.246797 |
| NLJHFNAOINRWEU | CCCCOC1=C(C=C(CSC(N)=N)C=C1)[N+][[O-]]=O      | 0.250474 |
| NNFCFDYRIJDRTR | [O-][N+](=O)C1=CC(=C(NC2=CN=CC=C2)C(=C1)[N+]( | 0.250621 |
| NNWLPSHIRKXURN | CCN(CC1=CC=CC=C1)S(=O)(=O)C2=CC=C(C=C2)C(=C   | 0.238789 |
| NORPBVDKCPDMPW | COC1=C(C=CC=C1)N2CCN(CC2)C(=O)C3=CC=C(COC     | 0.260129 |
| NPGHSFFDDMHHIK | COC1=CC=C(C=C1)N2CCN(CC2)C3=NC=NC4=C3C(=      | 0.259817 |
| NPGUYIWHZCFXDH | CC1=C(C)C2=C(S1)N=C(CN3CCCC3)N=C2C1           | 0.250321 |
| NPQZNMPPUASIAY | COC1=CC(OC)=C2N=C(C)C3=C(N(CC3)C4=CC=C(O)C    | 0.260844 |
| NRSZLJFVHLGBKL | CN(C)CCCN(C(=O)CCC1=CC=CC=C1)C2=NC3=C(S2)C    | 0.248565 |
| NRVTZAOZLYXAKX | COC1=CC(=CC(OC)=C1)C2=C(C3=CC=CS3)C4=C(C=C    | 0.255996 |
| NUFQQJRGQQZCOS | CCOC(=O)C1=C(NCCCN2CCOCC2)C3=C(N=C1)C(C)=     | 0.248123 |
| NVZZXTOSSAESJJ | ClC1=CC=C(NC(=O)OCCN2N=NN=C2C(N3CCOCC3)C      | 0.247821 |
| NWHRCFHGNQXGJD | FC1=CC=C(C=C1)N2CCN(CC2)S(=O)(=O)C3=CC(=CC=   | 0.25275  |
| NXGGPCHKCYCOAX | CN(C)CC(=C)C(=O)C1=CC2=C(OCO2)C=C1            | 0.241777 |
| NYLAUQJTBURUOI | C(N1CCN(CC1)\N=C\C2=CN=CC=C2)C3=C4C=CC=C      | 0.239698 |
| NYZGTUCQLQLOTI | ClCC(=O)NC1=C(C=CC=C1)C(=O)NC2=CC3=C(OCO3)    | 0.243288 |
| NZFUBWWCWIPTRM | CCN(CC)S(=O)(=O)C1=CN=C(C=C1)N2CCN(CC2)C3=    | 0.243826 |
| NZQWATWAVUWKFN | COC1=CC(=CC=C1)C(N(C(=O)CC2=CC=CS2)C3=CC(C    | 0.245071 |
| OAQPLTKFCVNYGE | CCOC1=C(C=CC=N1)C(=O)N2CCN(CC2)C(C3=CC=CC     | 0.242267 |
| OCENEPXQFHBLMK | CCN(CC)CC(=O)NC1=CC2=C(CCC3=C(C=CC=C3)N2C     | 0.320618 |
| OCESNVPJCFERML | CC1=CC(Cl)=C(C)C=C1S(=O)(=O)NC2=CC3=NNC=C3    | 0.249928 |
| ODFHSTUCJXXLQJ | CCC1=CN=C(CNCC2=CC=C(OCC(O)CN(C)CC3=CC=C      | 0.251904 |
| OEHRXJDSSPBTM  | CN(C)S(=O)(=O)C1=CC=C(NC(=O)N2CCN(CC2)C3=CC   | 0.23896  |
| OEKPRBMHQAEAGG | CCOC1=CC=C(C=C1)S(=O)(=O)NCC2=CC=NC=C2        | 0.269822 |
| OEWOYXMHZWAPJ  | CN(C)C(=S)N=C1SSC(=S)N1CC2=CC=CC=C2           | 0.244509 |
| OGEQWAXKLZAXPG | CN(C)CCCN(C(=O)C1=CC=C(C=C1)C(=O)C2=CC=CC=    | 0.249638 |
| OHDARSJSUPJOBG | COC1=C(CN(CC2=NC3=C(C=CC=C3)C(=O)N2)S(=O)(=   | 0.239646 |
| OHTLJXYBSOWPHN | COC1=CC=C(OC)C=C1)C2=C(OC(C)(C)N=C(OC(C)(     | 0.247273 |
| OHUPQINJOLRADC | C\C(=N/N=C(S)N(CC1=NC=CC=C1)CC2=NC=CC=C2)C    | 0.241534 |

|                |                                                |          |
|----------------|------------------------------------------------|----------|
| OIMLWOWVDNEGEN | COC1=CC(=O)C(OC)=C(OC)C1=O                     | 0.252368 |
| OJEVGRBYSIFLVB | CC1=C(Cl)C=C(NC(=O)CSC2=NC3=C(C=CC=C3)C(=O)    | 0.239759 |
| OJGPOHOXFKPODP | CSC1=CC=C(C=C1)C(=O)C2CCCN(CC3=CC=CN3C4=C      | 0.239209 |
| OJONFUYEVNZGMS | COC1=CC(OC)=C(C=C1)C2=[N+](C)CCN3C=CC=C23      | 0.240238 |
| OJZCDVLJMCJDQG | CCCCSC1=NC2=C(S1)C=C(NC3=NC(=NC(=N3)N4CC(      | 0.244021 |
| OKUZMGPFGBTMFL | COC1=C(OCC2=CC=C(F)C=C2)C=CC(CNCCC3=CNC4       | 0.253418 |
| OMMABXQBKXLFFT | CC(NCC(O)COC1=CC2=C(C=CC=C2)C=C1)C3=CC=CC      | 0.258012 |
| OMNBIEFISJHBDJ | CC1=C(CCNCC2=CC=C(Cl)C=C2)C3=C(N1)C=CC(OC(     | 0.243504 |
| ONZSYNDJBXYAM  | FC1=C(CNCCC(CC2=CC=CC=C2)C3=CC4=C(OCO4)C:      | 0.238638 |
| OOAPZUSKZNTZKO | CC(C)C1=CC(OCCCCN(C)C)=CC=C1                   | 0.261196 |
| OOEKANWELYHCMY | CC1=C(CSC2=NN=C(N2CC3=CC=CO3)C4=CC=CS4)C       | 0.24976  |
| OOJYVOXEFZVRNL | CCOC1=CC=C(C=C1)N=C(S)N2CCCN(CC3=C(C)C=CC      | 0.239148 |
| OQWWABIXMUFBUI | CC(CNC1=CC=C(C=C1)[N+](O)=O)OC2=NON=C2C        | 0.266686 |
| ORHQABFVUQKVIS | CN(C)CCCN(C=O)C1=CC=C(C=C1)S(=O)(=O)N2CCCC     | 0.24437  |
| OSEMTBZFAUSVMB | COC1=CC(OC)=C(C=C1)N=C2/SC3=C(CN2CCN4CC(       | 0.263174 |
| OWHDVIBZBONORH | CC(C)C1=C(OCC(=O)NC2=CC3=C(C=C2)N(C)C(CCN4     | 0.246116 |
| OWKZMPVHIVLZEX | CC(=C)C1CCC(CN2CCN(CC3=CC=CC=C3)CC2)=CC1       | 0.240397 |
| OXVQORLPGKNNFZ | CCCCN(C1CC2CCC(C1)N2C)C(=O)C3=CC=C(Cl)C=C3     | 0.241046 |
| PBFQBTABIKSPJC | COC1=CC(OC)=C(NC2=C3C=CC=CC3=NC4=C2CCC4        | 0.249054 |
| PBNSAAZNKRYIIS | C\C(=N/OCC1=CC=C(Br)C=C1)C2=NC=CC=C2           | 0.240468 |
| PBZPZRBFYOUOBJ | CCCCN(CC)CCNC(=O)C1=CC2=C(S1)C3=C(C=CC=C3)     | 0.249422 |
| PDICYFOXVGFINZ | COC1=C(C=CC=C1)N2CCN(CC2)\N=C\C3=CC(=C(Cl)     | 0.241765 |
| PDUPXVBNXBQTOH | C(N1CCCCC1)C2=CNC3=C2C=CC=C3                   | 0.268109 |
| PENGFPGDYHZNAP | COC1=C(CN2C=CC=N2)C=C(CN3CCCC(C3)C(=O)C4=      | 0.251591 |
| PENXDAMCASPCMY | CCOCCC\N=C(/S)N1CCN(CC1)C2=NC(=CS2)C3=CC=      | 0.256306 |
| PFUFOXKNRLGMSL | [O-][N+](=O)C1=NC=CN1CCNC2=C3C(C=CC=C3[N+      | 0.245174 |
| PHKAITMLWITDDV | CCN(CC)CCSC1=NC2=C(N=N1)C3=C(C=CC=C3)N2C(      | 0.261486 |
| PHZMYJRNQGSBG  | COC1=CC=C(C=C1N(C)S(=O)(=O)C2=CC=C(Cl)C=C2):   | 0.248895 |
| PIGWDDIGMRNVDO | CC1=CC(OCC(O)CN2CCN(CC2)S(=O)(=O)C3=C(C)C=C(   | 0.245047 |
| PIJBYDDOCXHZFH | N=C1N(CCN2CCOCC2)C=NC3=C1C(C4=CC=CC=C4)I       | 0.251164 |
| PJTXCMBEHDWJMJ | OC(CNC1CCCC1)COC2=CC=C(C=C2)C3=CC=CC=C3        | 0.250108 |
| PKERGGKJACRDCQ | CC1=NN2C(N=CC(C3=CC=CC=C3)=C2N)=C1C4=CC=       | 0.240477 |
| PKNFTRYZNWKASG | CCC1=CC=C(OCCCCN(C)CC2=CC=CC=C2)C=C1           | 0.252179 |
| PKTDIPACDGKPY  | COC1=C(NC2=C3C=CC=CC3=NC4=CC=CC=C24)C=C        | 0.243829 |
| PLHTVUFOHHOCSF | CN1CCN(CC1)C2=CC=C(C(=C2)N3N=C(C4=CC=CC=C      | 0.245059 |
| PMYNSLQJVYZORD | CC(C)C)C1=CC=C(C=C1)N=C(S)NCC2=CC=CS2          | 0.250576 |
| POQKFFNMUPZZRK | OCl(=O)(=O)=O.Oc(CN1C2=C(C=CC=C2)C3=C1C=CC     | 0.256586 |
| PTWKKKSNTGCGKY | CCCN1C(=N)N(CCOCC2=CC=C(OC)C=C2)C3=CC=CC(=     | 0.281532 |
| PTYQBUIBRXMOH  | CC(C)C\N=C(/S)N(CCC1=NC2=C(N1)C=C(C)C(C)=C2)   | 0.250122 |
| PWPWXLHAYGEBIS | CSC1=C(OCC2=CC(=NO2)C(=O)NCCN3CCCC4=C3C=       | 0.243432 |
| PWQZJFBQCSIYJG | CC1=NC2=C(C=CC=C2)C(=C1)C(=O)N3CCC(=CC3)C4     | 0.254396 |
| PXBLKWLLBSFBBD | CCCOP(=O)(C(NC1=CC=CC=C1)C2=CC=C(C)C=C2)C3     | 0.263519 |
| PXCQCBOGRVCHKF | C\C(=N/N1CCN(CC1)C2C3=C(C=CC=C3)C4=C2C=CC      | 0.266761 |
| PYEWRVJBQXWXNV | ClCC(=O)N=C1SC=CN1CC2=C(Cl)C=CC=C2             | 0.239395 |
| PZBATUNEVLSDIG | [O-][N+](=O)C1=CC(Cl)=C(NS(=O)(=O)C2=CC=CC=C2) | 0.246557 |
| QAFQNDKFLYMCFC | CCOC1=C(OCC)C=C2N3C=CC=C3C(NCC2=C1)C4=C(       | 0.252047 |
| QBEGUTHCSOWVOB | CCN(CC)CC(O)CN1C2=C(C=CC=C2)C3=C1C=CC=C3       | 0.265842 |
| QBYRWBBTOQMSDN | CN(C)CCCN1=C2C=CC=CC2=NC3=C1CCC3               | 0.265487 |

|                |                                               |          |
|----------------|-----------------------------------------------|----------|
| QCMZFCTUSGZVHX | OC(CNC12CC3CC(CC(C3)C1)C2)COC4=C(Cl)C=C(C=    | 0.244493 |
| QCWAHIREZGSIQK | CCC1=C(C=C(C=C1)C2=CC(C)=NO2)S(=O)(=O)N3CC1   | 0.259274 |
| QECYXZZAYWHQKA | COC1=CC=C(C=C1OC)CCNC=2C3=CC(=C(C=C3N=CN      | 0.249205 |
| QEKXMFPGXAXIOU | CCOC1=C(OCC2=CC=CC=C2)C(Cl)=CC(CNCCC3=CC=     | 0.268575 |
| QEQSXWLGYYHTFF | COCCN(CCOCC)C1=C2C=CC=CC2=NC(=N1)C3=CC=C(     | 0.249852 |
| QESGNZQXHOVHR  | ClC1=C(C=CC=C1)C(\N2CCOCC2)=N\C3=CC(Br)=CC    | 0.241862 |
| QFBBKUKXNCERIF | C\N=C(/S)N1N=C(CC1C2=CC=C(Br)C=C2)C3=CC=C(    | 0.292508 |
| QFMLSARVKDKZLE | CC1=CC(=CC(C)=C1)N=C(S)NCCN(C2CCCC2)C3CCC(    | 0.257241 |
| QFOHGRXAODPOFZ | CC1=CC=C(C)N1C2=CC=C(C=C2)C(=O)NC3CCN(CC4     | 0.247484 |
| QFTFZZJYAPSZFF | OC1CCCN(CC2=C3C=CC4=CC=CC5=C4C3=C(C=C2)C      | 0.241245 |
| QHOMAMNYIIILEC | CN(C)C1=CC=C(CNC2CC(C)(C)NC(C)(C)C2)C=C1      | 0.268293 |
| QIOCRCNQUZAYHU | CC1=NC(OCC(C)(C)C)=C(C(C)=C1)S(=O)(=O)C2=C(C) | 0.24688  |
| QIXGHKYUZRPJNK | COC1=CC=C(C=C1)C2=CSC3=C2C(=NC=N3)N4CCN(      | 0.257364 |
| QJEQNMXYYQUOAY | C\C(=N/NC(S)=NC1=CC(Cl)=CC=C1)C2=NC=CC=C2     | 0.250133 |
| QJRMVLSNYMICMY | CCOC1=C(OCC2=CC=C(F)C=C2)C=CC(\C=N\O)=C1      | 0.239551 |
| QKDMCYVRFPKIW  | COC1=CC=C(NS(=O)(=O)C2=CC(N)=C(C=C2)N3CCCC    | 0.240714 |
| QLEYAENRHBCCLS | CCCN(CCC)C1=CC(CC(C)(C)C1)=[N+]2CCCC2         | 0.250439 |
| QNFAGAPWMNDJKM | ClC1=CC=C(C=C1)C2=NC(N3CCSCC3)=C(N=N2)C4=     | 0.238757 |
| QNXYHIJIMBFHB  | CN1CCN(CC1)C2=CC=C(NC(=O)C3=CC=C(O3)C4=C(     | 0.251219 |
| QOABVBAPHTTZBQ | COC1=CC=C(C=C1)C(=O)C(CN2CCOCC2)C3=CC=CC:     | 0.25275  |
| QOXRKGCSSOOUCE | CCCOC1=CC=C(C=C1)C2=NC3=C(C=CC=C3)C(=N2)N     | 0.243833 |
| QPAUSEFRWOAHNY | CC1=CC=C(C=C1)C2=CN3CCCC3=[N+]2C4=CC=CC=      | 0.257601 |
| QPWQDQPRXBGKND | NNC1=NC2=C(N=N1)C3=C(C=CC(F)=C3)N2CC4=CC:     | 0.256968 |
| QPXLVBYIKHAFPH | COC1=C(C=CC=C1)\N=C(/S)N(CCCN2CCOCC2)CC3=     | 0.240922 |
| QQXBIXLVIFJHLJ | O=C(NC1=NC2=C(C=CC=C2)N1CCN3CCCC3)C4CC        | 0.247788 |
| QTDHFMBDIJSUNI | ClC1=CC=C(NC(=O)C2CCCN(C2)C3=NC=NC4=C3N=      | 0.239898 |
| QTHQMLMUIVEMBE | CCCCCCCCC[N+](C)(C)CC#C Vitas-M Laboratory,'  | 0.239958 |
| QTLRAYBBJLKXOP | COC1=CC=C(C[N]2N=NN=C2C(N3CCN(CC3)C4CCCC      | 0.239186 |
| QWKNZOOQCBSJMP | CN(C)CCCN(CC1=CC2=CC(C)=CC=C2NC1=O)C(\S)=N    | 0.252942 |
| QXCVDJEJBVQMAX | OC(CNCC1=CC=C(F)C=C1)(C2=CC=C(F)C=C2)C3=CC:   | 0.250409 |
| QXOKXZIVWIYPSI | COC1=CC(=CC(OC)=C1OC)C2=CC3=C(SC4=CSC=C       | 0.255185 |
| QYVJNOLAQFWVNH | CC(C)N1N=C(C)C(CN2CCC(CC2)C(=O)NC3=CC(=CC=    | 0.245241 |
| QZABAUGUFDUGHY | CC(=O)C(\SC1=C2N=CC=CC2=CC=C1)=N/NC3=C(Cl)    | 0.245095 |
| RAJNSLIDHIYJAD | ClC(Cl)(Cl)C1=NC2=C(C=CC=C2)N3N=NC=C13        | 0.242011 |
| RARVXOGFGVCHLE | CCCCOC1=C(CN(CCCl)CCCl)C=C(C)C=C1             | 0.243221 |
| RBGJBTCSPSNVCP | COC1=CC=C(CN2CCN(CC2)CC3=CC=CC=C3)C(=C1)C     | 0.251818 |
| RBPFQHWXRDLGK  | [O-][N+](=O)C1=CC(=CC=C1)C(=O)N2CCN(CC2)C3=C  | 0.239194 |
| RBRLGTLGTUBHPM | OC1=C(C=CC=C1)N2CCN(CC2)C(=O)C3=C4C=CC=CC     | 0.247917 |
| REKAMGPSQSKSHW | BrC1=CC=CC=C1N2C(=N)N(CCN3CCOCC3)C4=CC:       | 0.245886 |
| RFNVOGZLEKVTMA | OC(C1CCCN1)C2=C3C=CC=CC3=NC(=C2)C4=CC(C       | 0.260088 |
| RHKBXWCHOOPPSM | CCN(CC)CC(C)(C)C(=O)\C=C\C1=CC=C(C=C1)\C=C\C  | 0.239611 |
| RHVHUEROIBGXJT | CC(C)OC1=CC(=CC=C1)C(=O)C2CCCN(CC3=CC=CN3     | 0.245642 |
| RHZUUBXOXYENX  | COC1=CC=C(C=C1)C(CNC(=O)C2=CC(=CC=C2)S(=O)    | 0.241625 |
| RJCIRPVSLBLECQ | CCN1N=C(C(=O)NC2=C(C=CC=C2)N3CCCC3)C4=C(C     | 0.247368 |
| RJHKTRXMAXYCBF | COC1=CC=C(CCNCC2=C(N(C)C3=C2C=CC=C3)C4=C(     | 0.246113 |
| RJZNQJVLIVSQNQ | CC1=CC2=C(OCCN2C(=O)CCC(=O)NCCCN3CCC(CC4      | 0.248635 |
| RLDJXJNLXMWGOA | CC1=CC(NC2=C3C=CC=CC3=C(N=N2)C4=CC(=C(C=C     | 0.23926  |
| RNTSNHMJGYWEKC | CN(C)CCCN(C(=O)C1=CC=C(C=C1)S(=O)(=O)N(C)C2C  | 0.251835 |

|                 |                                                  |          |
|-----------------|--------------------------------------------------|----------|
| RPEUIPUAHNPTTQ  | CCOC(=O)C1=C(NC(=O)CSC2=NN=NN2C3=C(OCC)C:        | 0.241155 |
| RQDZLDRIYAKHKPP | CCC(=O)C1=CC=C(OCC(O)CN(CCC2=CC=CC=C2)CC3        | 0.258557 |
| RQVGCCGAQUDRPT  | C[N+](C)(C)CC1CCCC(C[N+](C)(C)C)C1=O             | 0.250118 |
| RUPBLWIJNNVTP   | CN(C)C1=NC(=NC(=N1)N(C)C)N(CCOC2=CC=CC=C2)       | 0.243341 |
| RVAARCEFQOBAS   | CC1=C(C2C(CCN)C2(C)C)C3=C(N1)C4=C(C=CC=C4)(      | 0.240238 |
| RVPBSHYEMHOHLI  | COC1=CC=C(C=C1)C2=NN=NN2C3=C(OC)C=CC=C3          | 0.301495 |
| RWKJZYJOUFZCBE  | CC1=NC2=C(C(=CS2)C3=CC=CS3)C(=N1)N4CCN(CC        | 0.243887 |
| RZTBKYKQRGWYHE  | O=C(CCC1=CC=CC=C1)NCC(N2CCC3=C2C=CC=C3)C         | 0.238874 |
| SAELUZHUVGEPDC  | CCN(C1=CC=CC=C1)S(=O)(=O)C2=CC=C(C=C2)C(=O)      | 0.24194  |
| SAMHYHOPAYQFKM  | CC1=C(C(=O)OCCOC2=CC(C)=CC=C2)C(=NO1)C3=C(       | 0.253901 |
| SBLKUDGIULXZDL  | COC1=C(OC)C=C(CC(C)N2CCN(CC2)C3=CC(=CC=C3)       | 0.239064 |
| SCACDDZDERNNJQ  | CC(C)NCCOCCOC1=C(Br)C=C(C)C=C1                   | 0.254607 |
| SCDCXJKXJWWTFC  | OCCC1CN(CC2=NC(=CS2)C3=CC=CC=C3)CCN1CC4=         | 0.247788 |
| SCLCQHFTAHMGLY  | COC1=CC=C(C=C1)C2=NC(CN3CCN(CC3)C4=C(OC)(        | 0.247001 |
| SCPOUXBOXZRUEC  | OC1=CC=C(C=C1)N2CCN(CC2)C3=NN=NN3C4=CC=          | 0.24602  |
| SCZAVKYSJQFZQE  | CN1CCN(CC1)C2=C(C=C(C=C2)[N+](O-)=O)C(=O)C       | 0.300636 |
| SEFPOGFLQJCNQ   | COC(=O)C1=C(NC(=O)N2C3=C(SC4=C2C=CC=C4)C=        | 0.24457  |
| SERARLPHLRPDEK  | COC1=CC=C2C=CC=CC2=C1C3=[N+](N=C(NC4=C(O         | 0.251573 |
| SESCWBOJVLPNPJ  | CCOC(=O)C2(CC1=CC(OC)=CC=C1)CCN(CC3=C(O)C(       | 0.244126 |
| SFAMFMRSBAURBQ  | CN1C=NC(=C1S(=O)(=O)OC2=C3C=CC=CC3=CC=C2)        | 0.240173 |
| SFLJKYWGKSRUHI  | CCC(C)(C)N1N=NN=C1C(N2CCN(CC2)C3=CC(=CC=C        | 0.252182 |
| SGTHCPWGCBBTQS  | CC1CN(CCCCOC2=CC(OC3=CC=CC=C3)=CC=C2)CC(         | 0.239105 |
| SHFSMMIREYPMIZ  | COC1=CC(=CC=C1)C2=C(C3=C(S2)C=CC=C3)C4=CC:       | 0.253749 |
| SHGHJFRHODQTAY  | NC(=N)SCC1=C2C=CC=CC2=CC=C1                      | 0.31074  |
| SIXYGYZZIPIIQY  | C\C(=N\NC1=C2C=CC(Cl)=CC2=NC=C1)C3=CC=C(N)       | 0.239027 |
| SJULWNAGWWLFPW  | CCN(CC)CC(=O)NC1=C(C(=O)C2=CC=CC=C2OC)C3=(       | 0.241348 |
| SLYAPTUIQBLMIT  | CC1=C(OCC(=O)NC2CCCC2)C=C(C(Cl)=C1)S(=O)(=C      | 0.241263 |
| SORBIQRUJDIFIF  | CCOC1=CC=C(C=C1)C2=NC3=C(C=CC=C3)C(=C2)C(=       | 0.251804 |
| SPSPOWPZVGSPTH  | OC1=C(NC(=O)C2=C(N=NS2)C3=CC=CC=C3)C=C(Cl)       | 0.239784 |
| SQBJBIZLVOLNJO  | CC1=NC(=NC(NC2=CC(Cl)=C(C)C=C2)=C1)N3CCOCC       | 0.243064 |
| SQJOFDOREZPAQN  | COC1=C(OC)C=C(CCNC2=C(C=CC=N2)C#N)C=C1           | 0.240019 |
| SRRXZDLALXNSBQ  | CCN1CCN(CC1)C(=S)C2=CC=C(Br)C=C2                 | 0.249755 |
| SSXVQELOGLQHU   | SC(=NC1CCCC1)N2CCOCCOCCN(CCOCCOCC2)C(S           | 0.241263 |
| STESNBKMEHDD    | ClC1=CC=C(C=C1)C2=C(CN3CCSCC3)N4C=CC=CC4:        | 0.241345 |
| SVCIDLBDONIET   | CN1C2=C(N=C1[N+])3=C(C=C(C=C3C4=CC=CC=C4)C       | 0.246654 |
| SVXRHEZOFABMBH  | C1CCC2=C(NC3=CC4=C(OCCO4)C=C3)C5=C(C=CC=         | 0.239439 |
| SWGJNUIYBDWJNN  | CC1=C(C)C=C(C=C1)C(=O)NCC(N2CCC3=C2C=CC=C:       | 0.245087 |
| SXZBYUVSZLNKJM  | COC1=C(OC)C=C(C=C1)C=C2\CSC\C=C\C3=CC(OC         | 0.248292 |
| SYERUUDLJVMPLJ  | CCCCN(CC)CCNC(=O)C1=CC2=C(S1)C3=C(NC2=O)C:       | 0.252913 |
| SYHIJYYMOZHSNX  | CC1=CC=C(OCCSCC2=NC3=C(N2)C=CC=C3)C=C1           | 0.250367 |
| SYXLOOHCNOJAFE  | CCC(N1CCN(CC1)C2CCCC2)C3=NN=NN3CC4=CC=           | 0.247569 |
| SYYGCUJYTYVGN   | [O-][N+](=O)C1=C(C=CC(=C1)C(=O)NC2=CC(Cl)=C(C=   | 0.251394 |
| TVFVSMYKTZQONF  | CN(CC1=CN(N=C1C2=CC=C(F)C=C2)C3=CC=C(C)C(=       | 0.250147 |
| TVKRDOZXUUNQKC  | CO\N=C(N1CCN(CC1)C2=C(Cl)C=C(C=C2)[N+](O-)       | 0.243489 |
| TVPLXFFKIHRXIQ  | CC(C)OC1=CC=C(C=C1)C(CCN' Vitas-M Laboratory,'   | 0.247541 |
| TVSQUWXEZAGGAK  | CC1=C(C(=O)NC2=NC3=C(CCCC3)S2)C(=NO1)C4=C(       | 0.243021 |
| TVTAROZZZQUKMA  | [O-][N+](=O)C1=CC=C(O1)C(=C Asinex Ltd.,BAS 070I | 0.241053 |
| TYCOHDNYAYQQMC  | CCOC(=O)NC1=CC2=C(C=C1)!: Chem Div,6204-000      | 0.240287 |

|                 |                                                        |          |
|-----------------|--------------------------------------------------------|----------|
| TYVVZRKDKNAKQL  | COC1=CC2=NC(=NC(N3CCN(CC3)C4=C(OC)C=CC=C               | 0.244287 |
| UAAALTLFXDOSFC  | CCN1CCN(CC(=O)C2=C(C)N(CC3=CC=CC=C3)C4=C2              | 0.24656  |
| UALDBRJEZANGIH  | CC1=C(CN2CCC(CO)(CC3CCCCO3)CC2)NC4=C1C=C               | 0.244347 |
| UBNQMQAKEHACQS  | CCOC(=O)N1CCC2=C3C1=CC4=C(C=C(OC)C(OC)=C4              | 0.239416 |
| UBNXZEQQZVZKGI  | CCN(CC)CCN(C(=O)C1=CC2=C(CCCC2)C=C1)C3=NC              | 0.248484 |
| UBQWKZBWKZJBQL  | C\C(=N/NC(=O)C(C1=CC=CC=C1)C2=CC=CC=C2)C3=             | 0.242639 |
| UCSWKWWBALRWHA  | CN(C)S(=O)(=O)C1=CC(NC(=O)CN2CCC(CC3=CC=CC:            | 0.246389 |
| UCWFKMCLVUTDNK  | CN(C)CCCN(C(=O)C1=C2C=CC=CC2=NC(=C1)C3=CC              | 0.240713 |
| UIJMDUXHELIQBM  | CC1=CC=C(NC2=NC(=NC(N\N=C\C3=CC4=C(OCO4)N              | 0.241678 |
| UINMGICZUPYDIS  | CCN1CCN(CC1)S(=O)(=O)C2=CC(C(=O)N(C)CCOC3=C            | 0.238807 |
| UJXNTMKNABVJLC  | CC(NC1=C(C=CC(=C1)N2CCN(CC2)S(C)(=O)=O)[N+](           | 0.239375 |
| UJYXJHAUJAVUPS  | CCOC(=O)C1=C(C)N(C2=C1C(CN(C)C)=C(O)C=C2)C3            | 0.247449 |
| ULIKHOKUJARYGT  | CN(C)CCNC(=O)COC1=CC=C(C=C1)C23CC4CC(CC(C              | 0.243786 |
| UONONLWVMSQVOV  | CC1=CC=C(C=C1)N2CCN(C2C3=CN=CC=C3)C4=CC=               | 0.248933 |
| UPDYFODQZAARMC  | NC1=NC2=C(C=CC=C2)N1CCOC3=C(CI)C=CC=C3                 | 0.25916  |
| UPYPKFGTIGBERH  | COC1=CC(NC(=O)CN(CC2=CC=C(F)C=C2)C3CCCCC3              | 0.250012 |
| UQGWTAWOZSDBV   | CC(\N=C(/S)NCC1=CC=C(F)C=C1)C23CC4CC(CC(C4)            | 0.246358 |
| UROAGBRHXNLTPV  | CIC1=CC=C(C=C1)C2=CN=C3CCCN23                          | 0.245719 |
| USVOEAYFZSWIIR  | CCOC1=CC=C(C=C1)C(=O)C(CN2CCOCC2)C3=CC=C(              | 0.240591 |
| USXULQFZBJCRHV  | COCCC\N=C(/S)N1CCN(CC1)C2=NC(=CS2)C3=CC=C              | 0.24516  |
| UTVTYBVMPOXYDT  | CC1CCN(CCC2=NC3=C(C=CC(NC(=O)COC4=CC=C(CI              | 0.260735 |
| UUIJAAPVQKLCRV  | CCN(CC)CCCNC(=O)C1=NOC(=C1)C2=CC=C(CI)C=C2             | 0.244432 |
| UUOFRWFOCBNQL   | CC1=CC(C)=C(C=C1)\N=C(/S)NCCC2=CC=C(CI)C=C2            | 0.243255 |
| UVPZPPRSQKHJX   | CN(C)C1=CC=C(N\C(S)=N\C23CC4CC(CC(C4)C2)C3)            | 0.2404   |
| UWPPLJAPAUPEGL  | COC1=CC=C(C=C1)[N+] <sub>2</sub> =C3SC(C)CN3C=C2C4=CC= | 0.245784 |
| UXEFRWPQRRAVAY  | COC1=CC(OCC(O)CN2CCC(CN3C(=O)C4=CC=CC5=C               | 0.240683 |
| UXLZBDSLOPHET   | COC1=C(C=CC=C1)N2CCN(CC3=CC=C(O3)C4=C(C=C              | 0.250002 |
| UYCPODUGTIKMQJ  | CCOC1=CC=C(CN2CCN(CC2)C(=O)C3=C4C=CC=CC4               | 0.244236 |
| UYLUHZDEWSZGQW  | CC1=CC=C(OCCN2C=C(C#N)C3=C2C=CC=C3)C=C1                | 0.253488 |
| UYTWVEVNIDBOOP  | CN1C2CCC1\C(=C/C3=CC=CC=C3)C(=O)\C2=C/C4=              | 0.241929 |
| VAJHKGKQGPAOTB  | CN(C)C1=C(CI)C(=O)OC(=C1)C2=CC=C(Br)C=C2               | 0.244281 |
| VBRPHTQWMPRTIL  | CC1CCCC(C)N1CC(O)COC2=CC=C(CI)C=C2                     | 0.240498 |
| VBSXPTVMOBQJBU  | FC1=CC=C(C=C1)C(=O)N=C(S)N2CCN(C\C=C\C3=CC             | 0.245464 |
| VBSXUUVLWVVBGPW | C1CC2=NC3=CC=CC=C3C(NC' Chem Div,C660-081              | 0.252663 |
| VBWIYMDGYOGPQH  | CC1=CC=C(C=C1)C2=C3C=CC=CC3=C(N=N2)N4CCC               | 0.240973 |
| VCBIEXLZPYLOK   | CN1C=NC(=C1S(=O)(=O)OC2=CC=C(CI)C=C2)[N+]( O           | 0.25181  |
| VCSUQZLXYTZUSA  | CC1=NN(C(NC2=CC=C(CI)C=C2)=C1)C3=CC(CI)=CC=            | 0.243027 |
| VFTDVICZBGDMMB  | COC1=CC=C(C=C1)C(=O)C2=C(OC)C=C(OC)C=C2                | 0.241962 |
| VITOPYUWSHTJCP  | CIC1=CC(CI)=C(OCCN2CCCC2)C=C1                          | 0.247906 |
| VIUARWLVOKKPBA  | COC1=CC(NC(=O)CC2=CSC(NC(=O)NC3=C(OC)C=CC              | 0.238761 |
| VIZQXDUFMCPNNR  | CC1SC2=C(NC1=O)C=C(C=C2)S(=O)(=O)CCC(=O)N3C            | 0.24433  |
| VJEYGFUKNKNUPI  | C\C(=N/N=C(S)N1CC2CCC(CC2)C1)C3=NC(C)=CC=C             | 0.247209 |
| VKJMTDRGVCGQAB  | FC1=CC=C(NC(=O)N2CCN(CC2)C\C=C\C3=CC=CC=C              | 0.239329 |
| VLRIXSOPPQTQRW  | OC(COC1=CC=C(C=C1)C(=O)C2=CC=CC=C2)CN3CC               | 0.256471 |
| VMFCPKMXXMFGCB  | CIC1=CC(NC(=O)CSC2=C(C=C3N4CCC(CC4)C3=N2)(             | 0.24346  |
| VNATTZOVBANMGI  | O=C(NCCCN1CCOCC1)\C=C\C2=CN(N=C2C3=CC4=                | 0.242623 |
| VNHQMMKCMKFKVIK | CN(C)C1=NC(SS1)=NCC2=CC=CS2                            | 0.248751 |
| VPLLEOWKJGEBQ   | CC1CCN(CCCNC(=O)C2=CC3=C(S2)C4=C(OC3)C=CC              | 0.251657 |

|                 |                                               |          |
|-----------------|-----------------------------------------------|----------|
| VPPSMUBPAGINDQ  | COC1=CC=C(CS(=O))(=O)C2=NC(=C(N2CC#C)C3=CC=   | 0.249151 |
| VPXGOSNPXCNGAI  | CSC1=CC=C(COC(=O)C2=C(C=CC(=C2)[N+](O)=O)N    | 0.253927 |
| VQNDYQDYUOUASP  | ClC1=C(\C=C\C=N\NC2=NC(=NC(=N2)N3CCOCC3)N     | 0.241725 |
| VRBRKGZQLMGDOZ  | CN(C)CCCN(CCCC1=CC=C(C=C1)C(C)(C)C(C)=O       | 0.240452 |
| VRJIARCVQYLUSK  | OC(COC(C1=CC=CC=C1)C2=CC=CC=C2)CN3CCN(CC      | 0.261817 |
| VROFFYZWONRMLJ  | CN(CCNC(=O)C1=CNC2=C1C=CC3=C2C=CC=C3)CC       | 0.251322 |
| VWMOAWMNLJJWES  | CC1=CC=C(C=C1)S(=O)(=O)NCC2CCN(CC2)C3=CC=C    | 0.253024 |
| VYYGUDPHNMYNOZ  | COC1=C2C=C3C=CC=CC3=NC2=C(C=C1)C(=O)NCC       | 0.25093  |
| VZJMIYLTPATHJF  | NC(=NC1=C2C=CC=CC2=CC(=N1)C3=NC=CC=C3)C4      | 0.26062  |
| WAOXRKSTEPNQHX  | FC(F)S(=O)(=O)C1=CC(=CC=C1)N=C(S)N2CCN(CC2)C  | 0.240745 |
| WAWQQSFPVMZFGI  | CC1=C(C)C(=CC=C1)N2CCN(CCNC(=O)CN3C=CC=C3     | 0.241251 |
| WCIBEZJZJGVGON  | CCN(CC)CCN1C2=C(N=C(C)S2)C3=C1C=CC(Cl)=C3     | 0.263197 |
| WCJPLNHOHLMXLW  | CN1C=C(CNCC2=CN(C)N=C2C3=CC=C(C=C3)C4CCC      | 0.249043 |
| WCVFHKQIKJXTB   | CN(C)\N=N\C1=C(C)NN=C1C2=CN=CC=C2             | 0.243383 |
| WDDZRPACTJCDQY  | ClC1=CC(Br)=C(OCCCNCC2=CC=CC=C2)C=C1          | 0.263614 |
| WDJCNXSMIWWVYFP | NC(N)=N\N=C\C1=CC=C(OCC2=C(Cl)C=C(Cl)C=C2)C   | 0.244928 |
| WETHLXVRTCYMEM  | COC1=C/C=C(CNC(=O)C(=C\C2=C\C=C/C(OC)=C\2O    | 0.247777 |
| WFMOFGWKZAWYQG  | COC1=C(OC)C=C2C(N)=NC(NC3=CC(Cl)=C(C)C=C3)=   | 0.240902 |
| WGQPJPGVHXXIAT  | O=C(NC1=CC=C(C=C1)S(=O)(=O)N2CCOCC2)C3=CC=    | 0.243777 |
| WJWDTOQCLKWEQZ  | COC1=CC=C(C=C1)C2=NC(NCC3=CN=CC=C3)=NC(=      | 0.240604 |
| WLHYVTHSELEICV  | COC1=CC2=C(SC(=N2)N(CCCN(C)C)C(=O)C3=CC=C(C   | 0.255516 |
| WLVBWARTACPUQP  | CCN(CC)C1=CC=C(\C=N\N2C(S)=NN=C2C3=C(Br)C=    | 0.243041 |
| WMVVRGRBAZJRT   | O=C(CSC1=NC2=C(S1)C=CC=C2)N3C4=C(SC5=C3C=     | 0.242171 |
| WODOFYSHORIFHD  | CN(C)CCCN(S(=O))(=O)C1=CC(=C(SC2=NN=C(C3CCCC  | 0.259931 |
| WQIYNLPMGLCLCN  | CC1=CC=C(C=C1)C2=CC(C(= Chem Div, K786-061    | 0.241555 |
| WQSKZUZWWWMTWP  | COC1=C(OC)C(OC)=C(CN(C)C(=O)C2=C3C=C(C)C=CC   | 0.245727 |
| WRAFTAVDGKMKAB  | CC1C(NC(C)C1=NO)C2=CC=C(C)C=C2)C3=CC=C(C      | 0.272942 |
| WRJNPNNNXDKGIT  | CN(CC1=CC=CC=C1)C2=NC(NCC3=CC=CC=C3)=C(C      | 0.239802 |
| WSAFOSLUYQLSH   | CC(O)=O.C\C(C1=CC(Cl)=C(Cl)C=C1)=N/N=C(N)N    | 0.241347 |
| WSKQJKVCLZTFGA  | SC(NCCC(C1=CC=CC=C1)C2=CC=CC=C2)=NC3=CC=C     | 0.243848 |
| WSNZTMMXOCBRKK  | CCN(CC1=CC=CC=C1)S(=O)(=O)C2=CC=C(C=C2)C=C    | 0.239883 |
| WVIRSODSHUDUOW  | COC1=CC=C(C=C1)N2CCN(CC(O)COC(C3=CC=C(F)C     | 0.252213 |
| WXPPGDOWCHYFSR  | CCOC(=O)C1=CCN=C1NC(S)=NC2=CC=C(Cl)C=C2       | 0.238522 |
| WXQWZSULCDJOPQ  | CN(C)C1=CC=C(CNC2=NC=CC=C2)C=C1               | 0.243964 |
| WXVSEVMFXFCFKU  | COC(=O)C1C(C(=O)OC)C(C(=O)OC)(C(=O)OC)C(C(=O) | 0.251772 |
| WYBNNZDNQBJYZ   | COC1=C(C=CC=C1)C(CCNCC2=CC=C(C=C2)N(C)C)C3    | 0.245168 |
| WYQBCCYUNHYXTC  | COC1=CC=C(C=C1)C(=O)CC(NC2=CC=C(C=C2)[N+](O   | 0.239692 |
| XBDYWBADVCXSTK  | OCCN1CCN(CC1)C2=NC3=C(C=CC=C3)C(=C2)C4=C      | 0.250742 |
| XCUBHVGZTRPNPL  | OC(C(CN1CCOCC1)C2=CC=CC=C2)(C3CCCC3)C4=C      | 0.244066 |
| XEJVOVDZHOXUAT  | CN(C)C1=C(C#N)C(OC2=C(C)C=C(Cl)C=C2)=NC=C1    | 0.259822 |
| XHJDLZKBWRACRS  | FC1=CC=C(C=C1)N2CCN(CCCNC(=O)C3CCCN(C3)C4     | 0.246751 |
| XHNKZHYGYVZHJ   | CCCCOC1=CC=C(C=C1)C(\C)=N\NC2=NCCN2           | 0.243925 |
| XHSAIGFLHNJOKP  | CCN(CC)C1=NC2=C(C=C(NC(=O)C3=CC=CS3)C=C2)C    | 0.240243 |
| XIGRAOLFCSXTG   | ClC1=C(Cl)C=C(C=C1)\N=C(/N2CCOCC2)C3=CC=CC    | 0.260059 |
| XIKYZTGDAQDTNU  | CN(CC(O)COC1=C2C=CC=CC2=CC=C1)CC3=CC=C(O      | 0.249032 |
| XIVYSLHGKXUJTD  | CC1=C(SC=C1)C(=O)C2CCCN(CC3=C(C=CC(C)=C3)N    | 0.23915  |
| XJHNORLJONUTKI  | O=C(OCC1=CC=CC=C1)N(CCCCN(CCCNCC2=CC=CC       | 0.246751 |
| XJYRYUOGCGZHDF  | CC1=C(C=C(Cl)C=C1)N2CCN(CC2)C(C3=NN=NN3C4     | 0.245844 |

|                 |                                                |          |
|-----------------|------------------------------------------------|----------|
| XKOVUBDUNUHXS0  | OC(CN1C2=C(C=CC=C2)C3=C1C=CC=C3)CN4CCN(C       | 0.242184 |
| XLKKCURUKPNNEA  | COC1=CC2=C(C=C1)[N+](CC3=C4N=CC=CC4=CC=C3      | 0.244628 |
| XLYSDMZAMKIWBN  | OCCN1CCN(CC1)C2=C(C3=CC=CC=C3)C4=C(NC2=C       | 0.251952 |
| XNHGVTDLRFSAPN  | CC1=NOC(\C=C\C2=NC(C)=CC=C2)=C1[N+](O)=O       | 0.252868 |
| XOIIRTQBVGWQOQ  | CCOC(=O)C1=C(C2=C(C=CC(OC)=C2)N1CCCN(C)C)C     | 0.262832 |
| XQPZUGBRDVZFDJ  | COC1=CC=C(C=C1)N2C=C(CNCCCN3C=CN=C3)C(=N       | 0.249752 |
| XSJWTEZTQHSADD  | CCCCCCCCCCCC[N+](C)(C)CC# Vitas-M Laboratory,! | 0.245582 |
| XUHGFSQXOLWNFW  | CCOC(=O)C1=CC(=NN1C2=C(F)C=C(F)C=C2)C3=CC=     | 0.250613 |
| XUTNMIQLYHXVJH  | CCOC1=C(OCC2=C(CI)C=CC=C2)C(Br)=CC(CNCCO)=     | 0.24593  |
| XVHFFYLQYILPQM  | CC1=C(N2C=CC=CC2=N1)C3=CSC(NC4=CC(C)=CC=C      | 0.245144 |
| XVINKGCPRSZLX   | CCC(\N=C(/S)NCC1=CC=C(F)C=C1)C2=CC=CC=C2       | 0.243957 |
| XVYSWTLMGNJWKT  | ClC1=CN=CC(CI)=C1N\N=C\C2=CC=NC=C2             | 0.262123 |
| XXVLKDRPHSFIIB  | CN(C)CCN1C(=O)C2=CC(=CC3=CC=CC(C1=O)=C23)[     | 0.242122 |
| XYKMESYITRVGTA  | OC1=CC=C(C=C1)[N+]2=C(C=C(C=C2C3=CC=CC=C3)     | 0.251264 |
| XZORRJRGPUBUJO  | CCC(C)NCCOCCOC1=C(Br)C=C(C)C=C1                | 0.25967  |
| YBXHHZVHHDHTOD  | [O-][N+](=O)C1=CC=C(\C=N\NC(=O)CN2C3=C(SC4=C   | 0.240759 |
| YDIIDGKQDPEWGP  | ClC1=CC(=CC=C1)C(=O)C2CCCN(CC3=C4C=CN=CC4      | 0.256101 |
| YDXNVEKPWOPIOB  | CC1=NC=C(N=C1)C(=O)NNC(=O)C2=CC=C(Br)C=C2      | 0.251588 |
| YECRMDXCCWJQRQ  | CN(C)CCCN(C(=O)C1=CC=C(C=C1)C(=O)C2=CC=CC=     | 0.24065  |
| YEZYPWUWHPIJFLE | C\C(=N/N=C(S)N1CCN(CC1)C2=NC=CC=C2)C3=NC=      | 0.256075 |
| YFODDWIUJODQNJ  | CC(C)OC1=CC=C(CNCCC2(CCOC(C)(C)C2)C(C)C)C=C    | 0.257049 |
| YFOISQFQTXOBA   | CN1\C=C/C(=O)C2=C(C)C=CC=C2)C3=C(CC1(C)C)C:    | 0.242321 |
| YHTDLQUZNMNIOR  | CC1=NOC(=C1)C2=CC(=C(C)C=C2)S(=O)(=O)NCCCN:    | 0.248604 |
| YIJBKFVBAAGOKC  | COC1=CC=C(C=C1)N=C(S)NC(N)=NC2=NC3=C(C=CC      | 0.239933 |
| YINNFAZGMMIJFN  | OCCCCNCC1=CC=C(OCC2=C(CI)C=CC=C2)C=C1          | 0.261008 |
| YIWWVKPIIIXLBSB | COC1=C(OCCCN2CCCC(C)C2)C=CC(CC=C)=C1           | 0.240066 |
| YKBOWZAAKMELLI  | CN(C)CCOC(=O)C1=C[N](CC2=CC=CC=C2)C3=CC=CC     | 0.240295 |
| YKKMJJGWUMHXHZ  | COC1=CC=C(C=C1)C2=C(C3=C(O2)N=CN(CC4=CC=C      | 0.239152 |
| YLWMAKXLSDXMED  | COC1=CC(CC(=O)NC2=NC(=CS2)C3=CC(OC)=C(OC)C     | 0.240167 |
| YNHWSBATNPTUPW  | CC(C)(C)N1N=NN=C1C(N(CC2=CC=CO2)CC3=CC=C(      | 0.240962 |
| YOMCMCXNHFXHSG  | CN1CCC2C(C1)C3=C(C=CC(C)=C3)N2C(=O)NC4=CC      | 0.299222 |
| YPRFHJIPLZZVDN  | COC1=C(C=CC=C1)C2=NC(CN2C3=CC=CC=C3)C4=C       | 0.247582 |
| YRWBDZODXRMJDJ  | COC1=CC(OC)=C(\C=C\C2=CC(C)(C)N=C(S)N2)C=C1    | 0.239335 |
| YSVZMAWDLNAATP  | CCN1CCN(CC1)S(=O)(=O)C2=CC(C(=O)NC3=C(C=CC     | 0.262162 |
| YUFKRFB0VWVWJRJ | N#CC1=C(N=C(C=N1)C2=CC3=C(OCCOCCOCCOCCOCC      | 0.239444 |
| YUPPELVWCBEYPQ  | CN(O)C(=S)C1=CC=CC=C1                          | 0.25317  |
| YUQBQMYRWOFRLV  | CC1(C)CC(=CC(C1)=[N+]2CCCCC2)N3CCN(CC4=CC=     | 0.239731 |
| YWVAFGKAVNYSSZ  | CC(C)(C)NC1=NC(NC(C)(C)C)=NC(NN)=N1            | 0.242922 |
| YXSUMTZEYLAKDC  | CC1=CC=C(CNC(N)=NC2=NC(C)=CC(C)=N2)C=C1        | 0.24048  |
| YYILJCASTDQTHM  | OC(CSC1=C(CI)C=CC=C1CI)CN2CCN(CC2)C3=CC=C(     | 0.260717 |
| ZANNRTNEIWXXEG  | COC1=CC=C(C=C1)N(C)S(=O)(=O)C2=CC(=CC=C2)C(:   | 0.242384 |
| ZBCONQPPSGNGCK  | O=C(N1CCN(C\C=C\C2=CC=CC=C2)CC1)C3=NN(CC4      | 0.243198 |
| ZCKCUBVQBIPCEZ  | COC1=CC(OC)=C(CN2CCN(CC3=C(C=CC=C3)C(F)(F)F    | 0.247869 |
| ZCMKKFLZOGVHPV  | CC1=C(\N=N\N2CCOCC2)C(=NN1)C(F)(F)F            | 0.2494   |
| ZCXJDVQGWDEQDD  | COC1=CC2=C(C=C1)N(C)C(C)=C2C(O)CN3CCC(CC4=     | 0.246047 |
| ZEDIOOZDWFAQFR  | CCCCCCC(O)(C(CN1CCOCC1)C2=CC=CC=C2)C3=CC:      | 0.241569 |
| ZEGIJHAYNYJTLA  | CN1CCN(CC1)C(=O)CCN2C(=S)S\C(=C/C3=C(CI)C=C    | 0.23988  |
| ZEGXDKXOBNMNHM  | CN(C)C1=CC=C(C=C1)C2C3CCCC4=C(C=CC=C4)C3=      | 0.263421 |

|                 |                                                         |          |
|-----------------|---------------------------------------------------------|----------|
| ZETGWOAMKIFVCD  | C1C1=CC=CC(Cl)=C1CN2C(=NC3=C2C=CC=C3)C4=C               | 0.247156 |
| ZFKSUSAQDQXBQU  | CCCCNCCCOC1=C(Br)C=C(C)C=C1                             | 0.23914  |
| ZGAVNXQAROBPJG  | C\C(=N/N=C(S)N1CCN(CC1)C2CCCCC2)C3=NC=CC                | 0.260434 |
| ZGSMAKABUUKIGZ  | COC1=CC=C(C=C1)N2CCC3=C(C)N=C4C(OC)=CC(OC               | 0.250934 |
| ZGTAJRXCMOHMGE  | CC1=CC=C(C=C1)S(=O)(=O)C2=C(N=C(N=C2)C3=CC=             | 0.254793 |
| ZGZKWXYPXZOLP   | CCOC(=O)C1=C(C)N(C)C(C)=C(C1C2=CC=C(C=C2)C(=            | 0.242628 |
| ZHSVAVLUGYWZLY  | FC1=CC=C(C=C1)N2CCN(CC2)C(CNS(=O)(=O)C3=CC              | 0.239119 |
| ZIADASSVEQFTPJ  | C1C1=CC(CSC2=NCCN2S(=O)(=O)C3=CC=CC=C3)=CC              | 0.239725 |
| ZKSCCNZKLCYNG   | C\C(=N/NC(S)=NC1=CC=C(C)C=C1)C2=NC=CC=C2                | 0.253654 |
| ZMEIUSLAHMLILY  | C\C(=N/NC1=NC2=C(S1)C=CC=C2)C3=NC=NC=C3                 | 0.265783 |
| ZNKZJFNZLZIBKB  | C1C1=CC(Cl)=C(CN2C=CC(C=C2)=NC=C(C#N)C#N)C=             | 0.250451 |
| ZOQUZJUOXNLBG   | SC(NC1CCCC1)=NC2=CC(Cl)=C(Cl)C=C2                       | 0.24986  |
| ZPKMAEIACURLLY  | NCC(C1=CNC2=C1C=CC=C2)C3=C(Cl)C=C(Cl)C=C3               | 0.246432 |
| ZQWQPIZBIBXILO  | FC(F)(F)C1=CC(=C(Cl)C=C1)S(=O)(=O)N2CCN(CC2)C:          | 0.244144 |
| ZRDDDLMFVDMLDV  | CC1=CC(OCNC2=C(C=CC(=C)N3CCOCC3)[N+](O-                 | 0.242109 |
| ZRPCBSVZDYOXLU  | OC(CN1C2=C(C=CC=C2)C3=C1C=CC=C3)CN4CCN(C                | 0.251721 |
| ZTSHUIKUXBMWIU  | COC1=C(CNCCC2=CC(Cl)=CC=C2)C=C(Br)C=C1                  | 0.243062 |
| ZVKRQQLIVGVTJW  | CC1=C(C(C)=C(C#N)C(SC2=CC=C(Br)C=C2)=N1)[N+](           | 0.272193 |
| ZVLDOCMMDSEFS   | CC1=NOC2=C1C(=NC=N2)N3CCN(CC3)C4=CC(Cl)=C               | 0.238589 |
| ZVRFHIOZZIRX    | CCN(CC)C1=CC=C(NC(=O)C2=CC3=C(N2)C=CC=C3O               | 0.250594 |
| ZWLLBMKHBAHHR   | CCN(CC)S(=O)(=O)C1=CC=C(CC2=C(Cl)C=C(C=N2)C(I           | 0.245013 |
| ZXLYQIGBMNBIGR  | CN1CCN(CC1)C2=C(NC(=O)C=C\C3=CC=C(F)C=C3)I              | 0.244455 |
| ZXPRMDFCJHQDNF  | C(CNC1=NC(=NC2=C1OC3=C2C=CC=C3)C4=CC=CC:                | 0.242826 |
| ZYGZEBPRTVGGB   | CC(C)(C)NC1=NN=C(CS1)C2=CC=C(Cl)C=C2                    | 0.244895 |
| ZYPWORFMWGRPSP  | CCCCC1(C)CC2=C(C=CC=C2)C(S)=N1                          | 0.246835 |
| ZYVNVSXHLQNSKF  | SC(NCCSCC1=C(Cl)C=CC=C1)=NC2=CC=CC=C2                   | 0.243746 |
| ZZBGZNIPTZCMW   | COC1=C(C=CC=C1)C2=C(C3=C(S2)C=C4OCOC4=C3)               | 0.25041  |
| ZZCOBZHGHUPJB   | COC1=CC=C(C=C1)N2C(COC3=CC=C(C)C=C3)=NN=C               | 0.259249 |
| AASRCBKEVNIKNS  | FC1=CC=C(C=C1)C(C#N)C2=CC=C(C=C2)C(=O)C3=CC=CC=C3       | 0.237494 |
| ACFMQNZEFBOBOS  | COC1=CC=C(C=C1)C2CCCN2CC(O)COC3=C(C=CC=C3)C(C)C         | 0.289474 |
| ACIVKCBUJZMHEJ  | COC1=CC(=CC(OC)=C1)C(=O)NC2=CC=C(C=C2)N3CCN(CC3)C(=C    | 0.241977 |
| ACLPGRMEXAUBOL  | CSC1=CC=C(C=C1)N2CCN(CCCNC(=O)NC3=C(F)C=CC=C3)CC2       | 0.224886 |
| ACYIFJVISTZKDH  | CCOC(=O)C2(CC1=CC(OC)=CC=C1)CCN(CC3=C4OCOC4=CC=C3)      | 0.247797 |
| ADAPKYLLFMLIQP  | CCN1CCN(CC1)S(=O)(=O)C2=CC(C(=O)N(C)CC3=C(Cl)C=C(Cl)C=C | 0.222704 |
| ADPFAIWAXXBVD   | CCN1CCN(CC1)S(=O)(=O)C2=CC(C(=O)N(C)CC3=C(Cl)C(Cl)=CC=C | 0.231533 |
| ADSUTYNVUAOYJE  | CC1=CC=C(NC(=O)NC2=CC(Cl)=C(F)C=C2)C=C1                 | 0.225507 |
| ADYMNXMINSVTR   | CN(C)C1=C(C2=CC=CC=C2)C(N)=C3C=CC=CC3=N1                | 0.232919 |
| AEKSGFBUSUPIU   | OCC2(CC1=CC=C(Cl)C=C1)CCN(CCCC3=CC=CC=C3)CC2            | 0.2842   |
| AFQJSVUEYGIVJR  | CCOC1=CC=C(C=C1)C2=CS\C(N2CC)=C(/C#N)C3=NN=C4CCCCC      | 0.226314 |
| AFVPSEWUXQUXPL  | CC1=CC2=C(C=C1)N=C([NH]2)C3CCN(CC3)CC4COC5=CC=CC=       | 0.224743 |
| AFWZWCFLKWMERJ  | CC1=CC=C(O1)C2=NOC(=N2)C3CCCN(C3)C(=O)C4=CC=C(Cl)C=C    | 0.22555  |
| AGCVPOVKAQCEKZ  | CN(C)CCOC1=CC=C(C=C1)C2=C(C(C)=C3C=CC=CN23)C4=CC=CC     | 0.255421 |
| AGJXMOUNRZOAQL  | CC1=CC(Br)=C(OCN2CCCC2)C(Cl)=C1                         | 0.277172 |
| AGMZYQRFQBWYMA  | CCOC1=CC=C(C=C1)C(O)(CCC(C)C)C(CN2CCOCC2)C3=CC=CC=C:    | 0.241531 |
| AGZPBADSPZYFK   | COC1=CC=C(OC(=O)NC2CCN(CC3=CC=C(Cl)C=C3)C2)C=C1         | 0.225463 |
| AHRRJYCTHQFNFIJ | CC1=CC=CC(C)=C1N2CCN(CC2)C(=O)NC3=CC4=C(OCCO4)C=C3      | 0.232099 |
| AHSMUGYEUDLUEJ  | CCOC1=C(OC)C=C(CN(C)CC2=CC(=O)OC3=C2C=CC(C)=C3)C=C:     | 0.230633 |
| AIARMSZYEHLPA   | CC1=CC=C(C=C1)N2CN(CCC3=CCCC3)CN=C2S                    | 0.234144 |

|                |                                                        |          |
|----------------|--------------------------------------------------------|----------|
| AIAUBLZIUFOPKQ | COC1=C(OC)C=C(CC(=O)C2=C(C)C(OC)=C(OC)C=C2)C=C1        | 0.260861 |
| AIHIQFKQKQRNDO | CN1CCN(CC1)C2=NC3=C(C=C(C=C3)N=C(S)N4CCCC4)C(C)=C2     | 0.224537 |
| AIPOQWXLFRZLBZ | FC1=CC=C(CN2CCC(CC2)C(=O)NC3=CC=C(OC4=CN=CC=C4)C=C     | 0.245715 |
| AISCERDTBIBFLE | CCC1=NOC(CN2N=C(C=C2C(=O)NCC3=CC=CS3)C4=CC=CC=C4)=     | 0.228875 |
| AIVPWARKSDFLRL | CCOP(=O)(C1=C(OC(=N1)C2=C(CI)C=CC=C2)N3CCCC3)C4=CC=    | 0.223151 |
| AJYMPTJHOJJOAX | OC(CSC1=C(CI)C=CC=C1)CN2CCN(CC2)C3=C(F)C=CC=C3         | 0.228084 |
| ALCDRILYESVMBT | CCOC1=CC=C(\C=N\NC(=O)COC2=C(C=CC=C2)C3=CC=CC=C3)C:    | 0.248478 |
| ALIGJLBZICSLG  | NC(=NOC(=O)C1=CC=CC=C1)C(CC2=CC=CC=C2)C(O)=NOC(=O)C:   | 0.288549 |
| ALLWYNNQMHUNLY | COC1=CC2=C(C=C1)C(C=C(S2)C3=C(OC)C=CC=C3)C4=CC=C(OCC   | 0.261341 |
| ALOLQKUQFQNHEP | COC1=C(NS(=O)(=O)C2=CC(NC(=O)NC3=CC=C(CI)C=C3)=CC=C2)  | 0.234222 |
| ALSZPRQIWXWJGV | COC1=C(C)C(OC)=C(\C=N\NC(=O)C2=CC=C(COC3=C(CI)C=CC=C3  | 0.235823 |
| AMJQCSLHSRWVTB | FC(F)(F)C1=CC(=CC=C1)N=C(S)N(CCCN2CCCC2)CC3=CC=CN3CC   | 0.230474 |
| AMYLJMRRCMPYGD | NC(=N)SCP(=O)(C1=CC=CC=C1)C2=CC=CC=C2                  | 0.251038 |
| ANHCGXPONAGNRS | CC1=CC(OCC(O)CN2CC3(C)CC2CC(C)(C)C3)=CC=C1             | 0.234722 |
| ANIBUTITUZXEIN | COC1=C(NC2=C3C=CC=CC3=NC4=C2CCC4)C=CC=C1               | 0.268164 |
| ANOXEUSGZWSCQL | COC1=C(OC)C2=C3[C@H](CC4=CC=C(OC5=C6[C@H](CC7=CC=C     | 0.304396 |
| AOMRGESQCJWXMU | CSC1=CC(NS(=O)(=O)C2=CC=C(C=C2)C3=COC(C)=N3)=CC=C1     | 0.255355 |
| APBGERKKEPNJPX | NNC(S)=NCC1=CN=CC=C1                                   | 0.232993 |
| APZNOVIGOGKSL  | BrC1=CC=CC(=C1)C2=NC(=NO2)C3=CC=NC=C3                  | 0.231923 |
| AQBXGPHZDHQKJU | COC1=CC=C(CCC2=CC(OC)=C(OC)C(OC)=C2)C=C1               | 0.282749 |
| AQDSFMDNNDYZQZ | CC1=CC=C(NC2=NC(CN3CCC4=C(C3)C=CC=C4)=NC(N)=N2)C=C:    | 0.269416 |
| AQIRCFUGHKTBRW | COC1=CC(=CC(OC)=C1)C(=O)NC2=CC=C(C=C2)C(=O)NC3=C(OC)   | 0.230892 |
| AQKSZPZBPSWIIF | COC1=CC=C(C=C1)C(=O)NNC(S)=NC(=O)C2=CC=CC=C2           | 0.22849  |
| AQLIQOWLNIWJQK | COC1=CC=C(OCC(=O)NC2=C(C=CC=C2)C3=CC=CC=C3)C=C1        | 0.284975 |
| ARFHVPIUSIFBRQ | O=C(NC1=CC2=C(CCC2)C=C1)C3=CC=CC=C3                    | 0.234587 |
| ASCMALAQEXFXOO | CC1=CC(NC(=O)C2=CC=C(COC3=C(CI)C=CC=C3)C=C2)=NC(C)=C:  | 0.22523  |
| ASGPCSXEGIHST  | CSC1=CC(CN2CCC(CC2)OC3=CC=C(C=C3)C(=O)N4CCCC4)=CC:     | 0.228897 |
| ASGYLGLHJVMQSD | CC1CN(CC(=O)NC2=NC(=CS2)C3=CC=C(CI)C=C3)CC(C)O1        | 0.235269 |
| ASINSSNRTKKCSK | CC1CC(C)CN(CCOC2=CC=C(Br)C=C2)C1                       | 0.246441 |
| ASMJXIDKPABPIX | COC1=C(C=CC=C1)C(=O)NC2=CC=NN2C3CCN(C\C=C\C4=CC=C(     | 0.235373 |
| ASODCVVTIYBPJW | C/N=C\1/C2=C(C3=CC(=CC=C3N2CCN1C)OC)C4=CC=CC=C4        | 0.229924 |
| ASVUGFSTHMYMMZ | COC1=CC(OC)=C(CN2CCN(CC2)C(=O)COC3=CC4=C(C=CC=C4)C=    | 0.225911 |
| ATEGWQFKEHLPHS | C(NC1=C2C=CC=CC2=NC(=N1)N3CCN(CC3)C4=CC=CC=C4)C5=(     | 0.225361 |
| ATKFQPJQNPDUHP | FC1=CC=C(C=C1)C2N(CCCN3C=CC=N3)CCC4=C2NC5=C4C=CC=      | 0.23311  |
| ATSPISXBGSVNJB | CC1=CC(NC2=CC=CC(=C2)[N+ Chem Div,4248-0392            | 0.229545 |
| ATTEYLKIDJNPW  | CCOC1=C(OC)C=C(CNC2CCCCC2)C=C1Br                       | 0.253714 |
| ATWQYIPIROSCR  | COC1=CC2=C(C=C1OC)C(C)N(CC3=C(OC)C=CC(\C=N\NC(=O)C4=   | 0.229011 |
| ATYQDOWOVFHSBG | COC1=CC=C(C=C1)S(=O)(=O)NC2=C(OC)C=CC(CI)=C2           | 0.239799 |
| AUBPAHGOPMKHON | CN1CCCN(CC2=C(Br)C=CC=C2)CC1                           | 0.225802 |
| AUHSCPWSQSCWHJ | CC1=NC(C)=C(S1)C2=CSC(NC3 Vitas-M Laboratory,STK135234 | 0.223193 |
| AUIABNOHKCXLLO | CC1=CC(OCCN2CCC3=C(C2)C=CC=C3)=C(C=C1)[N+][O-]=O       | 0.232733 |
| AUTKUCVVRPJBCM | C1=CC=C(C=C1)C2=NN=C(N=C2)C3=NC=CC=C3                  | 0.233558 |
| AVEBTIMALLPEHM | CCC(C)(N(N=O)C1=C(CI)C=CC=C1)C2=NN=NN2C3=C(C)C=CC=C3   | 0.232511 |
| AVMIDJMCARKKQD | CCCCOC1=CC=C(CN2CCSC2)C=C1                             | 0.223115 |
| AVQXSVWNHJNMRC | CN(CCC(=O)NC1=CC=C(CI)C=C1)CC2=CC=CC=C2                | 0.246379 |
| AVZUMYQYDQLHFF | ClC1=C(C=CC=C1)C2=CC=C(O2)\C=N\NC(=O)C3=CC=CC=C3       | 0.229733 |
| AWNGFBUYGOWSNY | ClC1=CN2C=C(N=C2C=C1)C3=CC4=C(OCO4)C=C3                | 0.231263 |
| AXCWVBQRHXIMP  | CN1C=CN=C1SCC2=CN3C=C(Br)C=CC3=N2                      | 0.226502 |

|                 |                                                                    |          |
|-----------------|--------------------------------------------------------------------|----------|
| AXGPAKQCBGOPEJ  | CN(C)CCCN(CC1=CC2=C(C)C=C(C)C=C2NC1=O)C(\S)=N\CC3=CC               | 0.229256 |
| AXGRPWAPOGHIQD  | COC1=CC(OC)=C(C=C1)C(=O)C2CCCN(C2)C3CC4=C(C3)C=CC=C4               | 0.269658 |
| AXRFHVSJXDUWGD  | COC1=C(C=CC=C1)N2CCN(CC3=CC(Br)=CC=C3)CC2                          | 0.254482 |
| AYDOMIXGYJLDMY  | COC1=C(OC)C(CNCC2=C(Br)C=CC=C2)=CC=C1                              | 0.263906 |
| AYELFEVAWGRWJK  | CN(C)CC\C=C1\C2=C(SC3=C1C=C(CI)C=C3)C=C(F)C=C2                     | 0.377801 |
| AYVUMJJNEANS DG | COC1=CC(=CC(OC)=C1OC)C(=O)N\N=C\C2=C(C)SC=C2                       | 0.240669 |
| AZJRNGLZWXWQT   | COC1=CC=C(C=C1)C2=C(SC(=N2)N3CCCCC3)C(=O)C4=CC=CC=C4               | 0.231472 |
| AZUPXLMDEBQPMR  | CC(C)NCC(O)C1=CC=C(C=C1)C2CCCC2                                    | 0.222923 |
| BAMHRHHJUIHVEL  | CN(C)C(CNC(=O)C1=C(CI)C=CC(=C1)S(=O)(=O)N(C)C2=CC=CC=C2            | 0.247382 |
| BAWIKNJTMONHPS  | CC1=NOC(=C1C(=O)O\N=C(/N)C2=CC=C(C=C2)C(C)(C)C3=CC=C3              | 0.23184  |
| BBNMGAAYWJNSLK  | COC1=CC=C(C=C1)C(\C)=N\N=C(/S)NCC=C                                | 0.223649 |
| BBVAPEPYNHBXNN  | CN1C=C(CN2CCN(CC2)C3=CC(C)=NC(C)=C3)C(=N1)C4=C(F)C=C4              | 0.24281  |
| BCHVIOYJXOCQFG  | CC1=CC=C(OC2=CC=C(C=C2)S(=O)(=O)NCC(C)(C)N3CCOCC3)C(=O)C4=CC=CC=C4 | 0.236161 |
| BCVQJQQTPWRCME  | CCC(N1CCN(CC1)C2=CC(=CC=C2)C)C3=NN=N[N]3C(C)(C)C                   | 0.235798 |
| BDDFHKQCQVEDIO  | CC(C)C1=C(OCC(O)CN(C)CC2=CC=CC=C2)C=C(C)C=C1                       | 0.254635 |
| BDSKZGMMUZJQQT  | COC1=C(OC)C=C(C=C1)C2=C(OC(C)(C)C)N=C(OC(C)(C)C)N=C2               | 0.319565 |
| BDSQWOPRSMBXAT  | CCOC(=O)CN1C(=N)N(CCOC2=CC3=C(C=CC=C3)C=C2)C4=C1C=C4               | 0.2527   |
| BEIOTRIMEFDJST  | COC1=CC=C(C=C1)C(=O)O\N=C\C2=C(SCC3=C(CI)C=CC=C3)N(C)C             | 0.224142 |
| BEKLGEVQKKS NLM | CCOC1=C(C=CC=C1)N2CCN(CC3=C(OC)C(OC)=C(OC)C=C3)CC2                 | 0.231657 |
| BFFQFOBHPRLZCN  | FC1=CC=C(C=C1)C2=NN=C(O2)C3=CC4=C(C=CC=C4)C=C3                     | 0.29579  |
| BFGKMEZYPPJWNA  | ClC1=CC=C(COC2=CC(CNCC3=CC=NC=C3)=CC=C2)C=C1                       | 0.226457 |
| BFJIMBWUFKWQDO  | CCOC(=O)C2(CCOC1=CC=CC=C1)CCN(CC3=CC(F)=CC=C3)CC2                  | 0.248952 |
| BFKGAYAKPZQXFE  | CCSC1=NSC(NC(=O)NC2=CC(F)=CC=C2)=N1                                | 0.22327  |
| BGGICLDHEUSDFV  | CSC1=CC=C(C=C1)S(=O)(=O)NC2=CC=C(F)C=C2                            | 0.232207 |
| BGOSATMJICJGCY  | COC1=CC=C(C=C1)C(N2CCN(CC2)C3=CC=C(OC)C=C3)C4=NN=N4                | 0.232081 |
| BHDNWYQMDQWZGK  | COC1=C(CI)C=C(C=C1)C2=CC=C(CNCCCN3CCOCC3)O2                        | 0.247144 |
| BHGWOZJFVFCQ    | CC1=CC=C(C=C1)S(=O)(=O)OC2=C(C=CC=C2)C3=CC=CC=C3                   | 0.270688 |
| BHPUCSXYFCWZKO  | C(COC1=C2C=CC=CC2=CC=C1)CN3CCCCC3                                  | 0.265849 |
| BIFMXJBRWDNSAA  | COC1=CC=C(C=C1)C2=C(C3=C(S2)C=CC=C3)C4=CC=C(O)C=C4                 | 0.234788 |
| BIPYEWPIKKNUMI  | CC(=O)NC1=NN(C(C)=O)C(C)(S1)C2=CC=CS2                              | 0.223997 |
| BISWIAQUGOELCK  | CCSC1=NC2=C(C=C(OC)C(OC)=C2)C(=N)N1CCCN3CCOCC3                     | 0.265593 |
| BJFHJAVFRVWDQJ  | COC1=CC=C(OCC2N(CCC3=C2C=C(OC)C(OC)=C3)C(S)=NC)C=C1                | 0.254213 |
| BJMUGVJXKMIWFB  | CC(NCC1=CC=C(OCC2=CC=C(CI)C=C2)C=C1)C(O)C3=CC=CC=C3                | 0.223347 |
| BJQKWSSXUZLJHP  | COC1=CC(CN2CCN(CC2)C(=O)C3=C(C)C=CC(=C3)S(=O)(=O)NC4=CC=CC=C4      | 0.232878 |
| BJRMIBIDQJDYPM  | CC(=O)N1CCN(CC1)C2=C(CI)C=C(NC(=O)C3=CC(=C(C=C3)N4CC=CC=CC4        | 0.225059 |
| BJUZJRDGGZMYBB  | CN(CC(O)COC(C1=CC=CC=C1)C2=CC=CC=C2)C3CCCCC3                       | 0.268393 |
| BKMXHRJXCXNEQV  | CC1=NC=C(CN2CCCC(C2)C(=O)NC3=CC=C(C=C3)C4=CC(F)=CC=C4              | 0.226393 |
| BLBOGNWRCZWBRL  | CCC(C)C1=CC=C(N\C(S)=N\C2=C(C)C=C(OC)C=C2)C=C1                     | 0.239345 |
| BLCDALNXTYIDY   | COC1=C(COC(=O)C2=CC(=CC=C2)N(C)C)C=C(C=C1)C(C)=O                   | 0.22492  |
| BLMLURKILFRZRZ  | COC1=C(OCC2=C(CI)C=CC=C2F)C=CC(CNCCN(C)C)=C1                       | 0.293234 |
| BLSVDFZAFIAGRO  | CC(=O)C1=CC(CN2CCC(CC2)C(=O)NC3=CC(=CC=C3)C4=CSC=N4                | 0.222908 |
| BLZMTXKDCRAJFA  | CC(C)(C)CC(C)(C)NCC(O)COCCOC1=CC=C(Br)C=C1                         | 0.231371 |
| BMBWRFABZOCADR  | CN(CC(=O)NC1=C(C=CC=C1)C2=CC=CC=C2)CC3=C(C)C=CC=C3                 | 0.229068 |
| BMGYCRITAPCASD  | CNCCCOC1=CC2=C(CCC2)C=C1                                           | 0.257926 |
| BMHG UWQJWGVXMD | C(SC1=NN=C(C=C1)C2=NC=CC=C2)C3=NC=CC=C3                            | 0.230966 |
| BMOIQSIAAWNCHF  | [O-][N+](=O)C1=CC(=CC=C1)C2=CC=C(CN3CCN(CC3)C4=CC=CC=C4            | 0.225686 |
| BNDNQOBIHDSIDO  | CC1=C(C)C=C(NC(=O)N2CCCN(CC3=CC=C(F)C=C3)C2)C=C1                   | 0.258858 |
| BOEIMGXBJBIBFB  | CC1CCCCN1C2=C3C=CC=CC3=NC=N2                                       | 0.229768 |

|                 |                                                        |          |
|-----------------|--------------------------------------------------------|----------|
| BOHJXWIKYKVKNM  | FC1=CC=CC(N\C(SCC2=CC=CC Vitas-M Laboratory,STK548494  | 0.229265 |
| BOSGQZOGZYRDLT  | SC(NCC(N1CCCCC1)C2=CC=CO2)=NCC3=CC=CO3                 | 0.223752 |
| BPJCPHVVMMHXPT  | O=C(NCCCCCCC1CCCCC1)C(C2CCCC2)C3CCCC3                  | 0.265998 |
| BPSUZGWXWZLOPC  | COC1=CC(NC(=O)C2=CC(=CC=C2)S(=O)(=O)N3CCN(CC4=CC=CC=   | 0.236329 |
| BQODYDMJEHLGFO  | CC1CC2=C(C=CC=C2)N1CC3=CC(=CC=C3)S(=O)(=O)N(C)C        | 0.247887 |
| BQPQYRCBUNHGPV  | CC1=C(C)C(=CC=C1)N2CCN(CC2)C(C3=CC=CS3)C4=NN=NN4C(C    | 0.229102 |
| BQVXYHYXISZSEZ  | ClC1=CC(NC(=O)NC2=CC=CC=C2)=CC=C1                      | 0.257285 |
| BQZXBDMZJFAFRA  | COC1=C(OC)C=C(CNC(=O)CC2=CC=C(C=C2)C3=CC=CC=C3)C=C1    | 0.233526 |
| BRTJTYYVQVSSDC  | COC(=O)C1=C(C=CS1)\N=C(/S)N2CCN(CC2)C3=C(C)C=CC(C)=C3  | 0.24367  |
| BRYSGTDRSIOCPS  | CCOC1=CC=C(NC(=O)C2=CC=C(CN3CCC4=C(C3)C=CC=C4)C=C2     | 0.224761 |
| BSMBZDDPUMOQPJ  | N(C1=N\C(=N/C2=NC=CC=C2)C3=C1C=CC=C3)C4=NC=CC=C4       | 0.242641 |
| BTHJSJWKKXLIKW  | COC1=CC2=C(NC(=C2)C(=O)N3CCN(CC4=CC=C(F)C=C4)CC3)C=    | 0.225883 |
| BTIQRDLMOKTWQC  | COC1=C(CNCC2=CC=C(C)C=C2)C3=C(C=CC=C3)C=C1             | 0.332308 |
| BTOPPOSOJXWFAJ  | CN1C=NC=C1C#CC2=C(SC3=C2C=CC=C3)C4=CSC=C4              | 0.22669  |
| BTPKXYVSPCTESF  | COC1=C(OCC2=CC=CC=C2)C(Cl)=CC(CNCCC3=CC=CC=C3)=C1      | 0.234719 |
| BTTVNTIBAFEWEV  | OC(COC1=CC=C(Cl)C=C1)CN2CCC(CC3=CC=CC=C3)CC2           | 0.269172 |
| BTVNLBYXURCKH   | CCC[C@@H](CN[C@@H](CNC)C(C)C)NCCCCC1=CC=CC=C1          | 0.224191 |
| BTXVDTFVASAZJF  | FC(F)(F)C1=CC(=CC(CCN2CCNC[C@@H]2CC3=CC=CC=C3)=C1)(    | 0.224064 |
| BUAHNKMYLRTGSL  | COC1=CC=C(C=C1)N2C=C(C3=C2N=CN=C3N4CCN(CCO)CC4)C5      | 0.241471 |
| BUNQSOFZXWJGTL  | CN(C)C1=NC(NC2=CC=C(F)C=C2)=NC(NN)=N1                  | 0.226677 |
| BUOCOYLLPODLCO  | CN(C)C1=CC=C(C=C1)C2N(CCN2C(=O)C3=CC=C(C)C=C3)C(=O)C   | 0.240204 |
| BUTMLLMFIQVESW  | CC1=CC(OCCN2CCCCC2)=C(C=C1)[N+][O-]=O                  | 0.268177 |
| BVRMUICYAKQBCW  | ClC1=CC=CC(=C1)[N]2C(=NN=C2SCC#N)COC3=CC=CC4=CC=CC=    | 0.224227 |
| BVZMDKSFUGHPNM  | O=C1N(CC2=CN=CC=C2)C[C@@H]3C[C@H](N4CCC[C@@]134        | 0.224449 |
| BWDSMWZBQJYVLD  | CN(C)CCOC1C2=C(CCC3=C1C4=C(C=CC=C4)C=C3)C=CC=C2        | 0.278688 |
| BWFJFDFSCPJWFL  | COC1=C(C=CC=C1)N2CCN(CC3=C(O)C=C(C)C(C)=C3)CC2         | 0.238928 |
| BXDSNVDDCYESMA  | CCOC1=C(OCC=C)C(Br)=CC(\C=N\O)=C1                      | 0.242257 |
| BXHHWAOVEHCDHF  | ClC1=C(C=CC(NC(=O)C2=CN=CC=C2)=C1)N3CCN(CC3)C(=O)C4=   | 0.226613 |
| BXJKOPVBUDWDQZ  | FC1=CC=C(CNC(=O)COC2=CC=C(Cl)C=C2)C=C1                 | 0.224681 |
| BXJXHNSQWRVHT   | CCC1=CC=C(C=C1)C2=NC3=C(C=CC=C3)C(=C2)C(=O)NN4CCN(C    | 0.228526 |
| BXSFUKRCGLOBQQ  | CN(C1=CC=CC=C1)C2=NC(=NC(=N2)[N]3C=CN=C3)N4CCCC4       | 0.224291 |
| BXYINYBUTMVQPS  | CC1=NC(=NC(=C1)N2CCOCC2)C3=C(O)C=CC=C3                 | 0.252139 |
| BXZQWBSRVZLWCC  | COC1=C(OCC2=CC(Cl)=CC=C2)C=CC(CNCCN3CCOCC3)=C1         | 0.307172 |
| BYTYAJKQMBGNK   | CC1=CC(CN2CCC(CNC(=O)NC3=C(C)C(Cl)=CC=C3)CC2)=C(C)C=C  | 0.275757 |
| BZACYZYRPQYTH   | [O-][N+](=O)C1=NC=C(C=C1)N2CCN(CC2)C3=CC(Cl)=CC=C3     | 0.243935 |
| BZIAEZXSQSIYSO  | COC1=CC=CC=C1N2CCN(CC2)C(C3=NN=N[N]3C(C)(C)C)C4=CC=    | 0.248249 |
| CACLSACREDIJKKA | CC1=CC=CC(=C1)N2CCN(CC2)C(=O)C3=CC=NC=C3               | 0.227805 |
| CAHYBXRVISPHFZ  | C\C=C(/C)CN1CCN(CC1)C2=CC(=CC=C2)C                     | 0.263234 |
| CBLQZPJUGCLDBK  | CC(C)COC1=CC(=CC=C1)C(=O)NC2=CC=C(CN3CCOCC3)C=C2       | 0.233119 |
| CBYUCPYFKGYOHO  | COC1=CC=C(OC)C(NC(=S)N(CCC2=C(C)NC3=CC=CC=C23)CC4=C    | 0.226976 |
| CCOPWNUUIGRDLJ  | CCN1C(=O)C=C(OCC(=O)NCCCN2CCN(CC2)C3=CC(Cl)=CC=C3)C    | 0.22587  |
| CDFYRTDHIKBKFK  | CN(C)S(=O)(=O)C1=CC(=CC=C1)C2=CN3C=C(Cl)C=CC3=N2       | 0.227464 |
| CDHZIABROIXFSK  | CC1=CC(NC(=N)NC2=NC(C)=C Chem Div,4477-2810            | 0.230941 |
| CDJKCCVJOSEVCN  | COC1=CC(=CC(OC)=C1OC)C(C[N+][O-])=O)C2=C(C)NC3=C2C=C(  | 0.227365 |
| CDOFQIKMXHKBAM  | CN(C)CCNC(=O)C1=CC(NS(=O)(=O)C2=CC=C(C)C=C2)=C(C=C1)N: | 0.224304 |
| CDQDBARFPXIBDL  | CCOC1=C(C=CC=C1)N2CCN(CC3=CC=CO3)CC2                   | 0.223888 |
| CEBGMERQJUUHQ   | COC1=CC(\C=N\NC(S)=NC2=CN=CC=C2)=CC=C1                 | 0.223044 |
| CEGNVVBQHXHNIS  | CCN(CC)CCCN(CC1=CC=C(C)O1)CC2=CC=C(C)O2                | 0.246589 |

|                 |                                                        |          |
|-----------------|--------------------------------------------------------|----------|
| CELVNGSELGNMX   | CN(C)CCCNC(=O)C(\NC(=O)C1=CC=CC=C1)=C/C2=CC=C(O2)C3=   | 0.232595 |
| CEONVQJNAZKJEP  | COC1=C(NC(=O)CN(C)C2CCCC2)C=C(Cl)C=C1                  | 0.225634 |
| CEZSIEYRNYQISC  | OC1=CC(\C=N\N2CCN(CC2)C3C4=C(C=CC=C4)C5=C3C=CC=C5):    | 0.227509 |
| CFDQVGFNCRRBHF  | CC1=NN2C=C(C=NC2=C1Br)C3=CC(Cl)=CC=C3                  | 0.231501 |
| CFGFKGXGORLUDT  | CC1=N[N](C2=CC=CC=C2)C(=C1)C(=O)NCCN3CCN(CC3)C4=CC=    | 0.257222 |
| CFLROMZYSCLTKV  | COC1=CC=C(NS(=O)(=O)C2=CC=C(C=C2)C(=O)N3CCCCC3)C=C1    | 0.231824 |
| CFQDHJAYMGIKSH  | CC(C)C(N(CC1=CC=CS1)CC2=CC=CC=C2)C3=NN=NN3C(C)(C)C     | 0.235233 |
| CFRXYOYUERVVQOJ | FC1=CC=C(\C=N\NC2=C3C=CC=CC3=NC(=N2)C4=CN=CC=C4)C=     | 0.226378 |
| CFVDXHSQQLTGMR  | CC1=CC(OCCN2CCC3=C(C2)C=CC=C3)=C(Cl)C=C1               | 0.237775 |
| CFWGNVBFHLHVDZ  | CN(C)CCOC2(CC1=CC=C(C)C=C1)CCC(CC2)C(C)(C)C            | 0.282242 |
| CFWRFUOXDOJOMS  | CCN(CC)C1=CC=C(C=C1)C(=O)N\N=C\C2=C(OC(F)F)C=CC=C2     | 0.224016 |
| CGFOMWCQKNHSDI  | NC1=C(Cl)C=C(C=C1Cl)\N=N\C2=CC=CC=C2                   | 0.255718 |
| CGNKPCLUWSNJCD  | [O-][N+](=O)C1=C(CN2CCN(CC3=CC4=C(C=CC=C4)C=C3)CC2)C=  | 0.23251  |
| CHGKOYRZOJKRGJ  | COC1=CC(CN(CCC2=C(C)NC3=C2C=C(C)C=C3)C(S)=NC(C)(C)C)=C | 0.23517  |
| CHJVUQSZTPIBOH  | COC1=C(Br)C=C(\C=N\N2CCN(CC3=CC=C(C)C=C3)CC2)C=C1      | 0.265746 |
| CHLGGFOIALNAM   | O\C(CN1CCN(CC1)C2=C(F)C=CC=C2)=C(\C#N)C3=NC(=CS3)C4=   | 0.227847 |
| CHWNQKIZEDLWAC  | CC1=C2COC(C)(C)CC2=C(C#N)C(=N1)N3CCN(CC4=CC=CC=C4)C    | 0.228759 |
| CIUJRBUERMUQIZ  | COC1=CC=C(C=C1)C2=NN(C(C2)C3=CC=CC=C3)C(=O)C4=CC(=C    | 0.259136 |
| CIXYZNFDMNWESE  | BrC1=CC=C(C=C1)S(=O)(=O)NC2=CC(=CC=C2)C(=O)NC3CCN(CC   | 0.235736 |
| CKMNSLDZNGQQFK  | CC(C)CC(=O)NC(C1=C(Cl)C=CC=C1)C2=C3C=CC=CC3=CC=C2O     | 0.223144 |
| CKOYRYPZEZRCO   | COC1=C(C=CC=C1)C2=C(C3=C(O2)C=CC=C3)C4=CC5=C(OCO5)C    | 0.226234 |
| CLBBSJHIPCURMH  | CC(C)NC1CCC(CC1)NC2=C3C=CC(Cl)=CC3=NC=C2               | 0.267144 |
| CLCZLSWNLPIOR   | COC1=C(C=C(Cl)C=C1)C(=O)NC2=C(C=CC=C2)N3CCN(C)CC3      | 0.25968  |
| CLESYUIRTDJQBD  | COC1=CC=C(CN2N=NN=C2CN(CC3=CC4=CC=C(C)C=C4NC3=O)(      | 0.223564 |
| CLNLJBXCSNSBRR  | OC1=C(CN2CCN(CC3=CC=CC=C3)CC2)C=C(Cl)C=C1              | 0.231376 |
| CMEZREFGTWJCD   | CCOC(=O)N1CCC(CC1)NC(S)=NC2=CC3=C(C=C2)N=C(C=C3)N4     | 0.226818 |
| CMRJNXIGRAVTPW  | ClC1=C(Cl)C=C(C=C1)C2=CN3CC4=C(C=CC=C4)C3=N2           | 0.223871 |
| CMZLSJOICXCPRS  | ClC1=C(C=CC=C1)N2CCN(CC3=CNC4=C3C=CC=C4)CC2            | 0.236301 |
| CNCQKPLZYJPG    | OC(=O)C(F)(F)F.C(CCNCCCNC1=CC=CC=C1)CNCCCNC2=CC=C      | 0.229559 |
| CNGTZCYFEYRLDM  | COC1=CC=C(OC)C(=C1)C(N2CCN(CC2)C3=CC=C(F)C=C3)C4=NN:   | 0.248287 |
| CNPYOSIWMMDNAMU | CCN(CC)CCCC(C)NC1=C2C(Cl)=CC=CC2=CC=N1                 | 0.274589 |
| CNSRUOBRAULBTH  | C(N1N=CC2=C1N=CN=C2N3CCN(CC3)C(C4=CC=CC=C4)C5=CC=      | 0.248017 |
| CNYRNWBKXAGLAB  | COC1=CC2=C(S(C3=C(C=C(OC)C=C3)C(C2)N4CCN(C)CC4)C=C1    | 0.354229 |
| COAXYFCHSALIKC  | COC1=C(OC)C=C(CCN(C=O)C2CCN(CC3=C(C)OC(=N3)C4=C(C)C=   | 0.227143 |
| COCFXAMJVUWCAE  | CC1=CC(C)=C(CN(\N=N\C2=NON=C2N)C3=NON=C3N)C=C1         | 0.233472 |
| COEGXHSYEOXWIM  | COC1=CC=C(OC2=NC3=C(C=CC=C3)C(C)=C2)C=C1               | 0.249312 |
| COGWQKWMKKWWTG  | CC1=CC=C(CON2C(=NC3=C2C=CC=N3)C4=C(Cl)C=C(Cl)C=C4)C=   | 0.222896 |
| CPGAZACKLLWLCI  | CN(CC1=CC=CC=C1)C(NC(=O)C2=CC=CC=C2)C(Cl)(Cl)Cl        | 0.224604 |
| CPYUHASOANZKJ   | CC1=CC(OCCOCCN2CCCC2)=C(C=C1)C(C)(C)C                  | 0.268285 |
| CREWBZNTQFJRTK  | ClC1=CC=C(C=C1)C2(CC2)C(=O)N3CCC(CC3)N4N=C(OC4=O)C5:   | 0.239514 |
| CRKWINMSRQMAMG  | OCC2(CCOC1=CC=CC=C1)CCN(CC3=C(OC(F)F)C=CC=C3)CC2       | 0.227057 |
| CROXNVPOHIITIU  | C(NC(NCC1=CC=CC=C1)=NCC2=CC=CC=C2)C3=CC=CC=C3          | 0.354574 |
| CRVUUBYQNLMAN   | CSC1=CC(=CC=C1)N=C(S)(CCN2CCCC(C)C2)CC3=CC=CS3         | 0.320991 |
| CSBCZTFCHKVEHH  | CC1=CC(Cl)=C(OCCCCN2CCOCC2)C=C1                        | 0.230217 |
| CSDXZWBEXVREQ   | COC1=CC=C(C=C1)C2=NC(=NO2)C3=CC=CS3                    | 0.237659 |
| CSVSFHSGBPJKL   | CCN(CCC(=O)NC1=CC(OC)=CC(OC)=C1)CC2=CC=CC=C2           | 0.223142 |
| CTABHCUZJBWUKN  | CCC1=C(C(N)=NC(N)=N1)C2=CC(N=[N+]=[N-])=C(Cl)C=C2      | 0.233401 |
| CTFGZCLXDDSDZSP | COC1=CC=C(C=C1)C2=CSC(=N2)N(CCCN(C)C)C(=O)C3=C(Cl)C=C  | 0.281027 |

|                 |                                                         |          |
|-----------------|---------------------------------------------------------|----------|
| CTHFPUVDOBFICV  | CCN1CCN(CCCN(CC2=CC=CO2)C(\S)=N\N\C3=CC(CI)=C(C)C=C3)C( | 0.293047 |
| CTRALNDVXGSNGG  | CCOC(=O)NC1=CC2=C(SC3=C(C=CC=C3)N2C(=O)CN4CCN(C)CC2     | 0.244615 |
| CTSMNTKHEBETQQ  | CC(CCN1CCN(CC1)C2=CC=CC=C2)C3=CC=CC=C3                  | 0.259407 |
| CUCBNBGILSWLMM  | COC1=CC(OC)=C(C=C1)N2CC(CC2=O)C(=O)NC3=C(C=CC=C3)N4     | 0.225912 |
| CUDAUFWNWXEKQT  | CCCCNC1=NC(=C2CN(C)CCC2=C1C#N)N3CCCC3                   | 0.227067 |
| CVDCNSWAKGHLPW  | CCOC1=C(C=CC=C1)N2CCN(CC2)C(=O)C(SC3=CC=CC=C3)C4=CC     | 0.244386 |
| CVLRQJYHVVASQZ  | CCOC(=O)C2(CCOC1=CC=CC=C1)CCN(CC3=CN=C(SC)N=C3)CC2      | 0.242496 |
| CVOWBCFITZKFG   | COC1=CC=C(C=C1)N(CC=C)C(=O)C2=CC=CC=C2                  | 0.240527 |
| CVRHZDVULXGZKK  | ClC1=CC(=CC=C1)N2N=NN=C2SCC#C                           | 0.247722 |
| CWAOFVPMZVLPDA  | CC1CCN(CCC2=NC3=C(C=CC(NC(=O)COC4=CC=C(C)C=C4)=C3)N     | 0.251721 |
| CWHPCVUWPBDYDN  | COC1=CC(NC(=O)CN2CCCC2)=C(OC)C=C1NC(=O)C3=CC(C)=CC      | 0.227559 |
| CWJUGFJMCXYHKKH | CC1=CC(C)=C(OCC(=O)NC2=CC=C(CN3CCCC3)C=C2)C=C1          | 0.252238 |
| CWLJSHKCKQBYCI  | COC1=C(OCC#N)C(Br)=CC(CNC2CCCCC2)=C1                    | 0.260064 |
| CXGKBIKEBNIOL   | CC1=NN=C(O1)C2=CC(=C(OC3=CC(C)=C(C)C=C3)C=C2)[N+](O)C   | 0.234553 |
| CXWDUNHYRYDJT   | COC1=C(OC)C=C(CCN(C=O)CSC2=CN(CC3=CC(C)=CC=C3)C4=C2     | 0.231406 |
| CYBCSVDRVUWPDN  | CC(CC1=CC=CS1)NC(S)=NC2=CC=CC=C2                        | 0.267553 |
| CYCYXQWOYFRCKV  | COC1=C(NC(=O)C2=CC=C(C=C2)[N+](O)C=C(C=C1)C(=O)NC       | 0.260794 |
| CYYQCICIVGWIRA  | CC1CC(C)CN(CC(O)COCCOC2=CC=C(Br)C=C2)C1                 | 0.253026 |
| CZMIHGKZSLTWDH  | ClC1=CC(CC2SC(N\N=C\C3=CC=CS3)=NC2=O)=CC=C1             | 0.227206 |
| DAAIJRXTWDBNW   | COC1=CC=C(C=C1)C2=NC(=C(O2)N3CCCCC3)C#N                 | 0.225958 |
| DABAZMUSWLQFIC  | C(OC(CN1CCCCC1)CN2CCCCC2)C3=CC=CC=C3                    | 0.266121 |
| DACRAQACYIOEFP  | CC(C)NC(=NS(=O)(=O)C1=CC=CC=C1)C(Cl)(Cl)Cl              | 0.243597 |
| DADKYQVHBKPSMQ  | CC1=CC=C(C=C1)C(N2CCN(CC2)C3=CC=CC(=C3)C)C4=NN=N[N      | 0.251053 |
| DAHVKHKOXKQRNL  | CC1CCCCN1CCNC(=O)C2=CC3=C(C=C2)S(=O)C4=C(C=CC=C4)C(     | 0.223606 |
| DAKQYIUMJPHKKX  | CN(C)CC(=O)NC1=CC=C(OC2=CC=C(Cl)C=C2)C=C1               | 0.273482 |
| DAKSQZZDXNAHO   | COC1=C(OCC2=CC=CC=C2)C(CNCCC3=CNC4=C3C=CC=C4)=CC=       | 0.230967 |
| DAOJEQLQWZKXBS  | CCN(CC)C1=NC(=CC(=N1)C(N)=O)C2=CC=CC=C2                 | 0.234698 |
| DBCUBSHSBILWMT  | CC1=C(F)C=C(C=C1)S(=O)(=O)NC2=CC(=CC=C2)C(=O)NC3CCN(C   | 0.232173 |
| DBWZSMKWALMPGA  | SC(NCC1CCCCC1)=NC2=CC=C(OC3=CC=CC=C3)C=C2               | 0.247151 |
| DBXXUXQUEUCCQQ  | COC1=CC(NC(=O)CN(C)CC(=O)NC2=C(C=CC=C2)C3=CC=CC=C3)     | 0.249485 |
| DBYBMKZBIDYVCC  | COC(=O)CC1=CC=C(C=C1)N=C(S)N2CCN(CC2)C3=C(C)C=CC(Cl)=   | 0.224785 |
| DBYCLOFOYRQWNH  | CCOC1=C(NC(=O)CN2CCC3=C(C2)C=CC=C3)C=CC=C1              | 0.223729 |
| DCHIGJKFAJLWRP  | CN(C)CCCNC(=O)C1=C2C=CC=CC2=NC(SC3=CC=C(C)C=C3)=C1      | 0.245018 |
| DCMLHASVCBLPNN  | CCC(C)NCCOCCOC1=C2C=CC=CC2=C(Cl)C=C1                    | 0.244916 |
| DCPQZEDTFBGXDX  | CCOC(=O)N1CCN(CC1)C2=C3C=CC=CC3=NC(=N2)C4=CC=CS4        | 0.223667 |
| DDNMSWYZEIZUAD  | ClC1=CC=CC=C1NC(=O)CSC2=NC(=NC(=N2)N3CCOCC3)NC4=CC      | 0.224072 |
| DDUMHFXTQIMXFR  | CN(C)CCNC(=O)C1=C2N=C3C(F)=CC=CC3=NC2=CC=C1             | 0.260806 |
| DEAURHCATALVPR  | COC1=CC=C(C=C1)C(N)=NOC(=O)CC2=CC(OC)=C(OC)C=C2         | 0.264921 |
| DEMDFVSPNYKHJF  | CCN(CC)CCN1C(NCC2=CC=C(OC)C=C2)=NC3=C1C=CC=C3           | 0.223287 |
| DEOIIOVUIGWUNZ  | COC(=O)C1=CC=C(OCCOC2=CC=CC=C2)C=C1                     | 0.226519 |
| DEURQQYOCUQBZH  | COC1=CC=CC=C1NC(=O)CN2CCN(CC2)CC(=O)NC3=CC=C(Cl)C(=     | 0.226257 |
| DFAZKXXYTBVFSM  | CC1=CC(N2CCN(CCCC3=CC=CC=C3)CC2)=C(C)C=C1               | 0.254936 |
| DFIBKKCZVMHTRL  | N\C(=N/O)C1=NC(=NC(=N1)N2CCCC2)N(C3=CC=CC=C3)C4=CC=     | 0.243062 |
| DFUSOVKMCNZCRI  | COC1=C(OC2=C3C=CC=CC3=C(Cl)C=C2)N=C(N=C1)C4=NC=CC(=     | 0.222681 |
| DGMBGNDGWVUWFU  | COC1=CC=C(C=C1)C2=C(N(C)C3=C2C=C(C=C3)C4=NNC=C4)C5=     | 0.222869 |
| DGOYFIDOIXRNR   | CCOC(=O)C1(SC2=C(NC1=O)C=CC(C)=C2)N(CC)CC               | 0.250163 |
| DHAMFUBSTHXWDX  | CCCCN(CCCC)CC(O)COC1=CC=C(Br)C=C1                       | 0.291383 |
| DHIINGHRFJVSJJ  | CCN1CCN(CC1)C2=NC3=C(C=C(NC(=O)CCC(=O)N4CCN(CC4)C5=     | 0.229648 |

|                 |                                                          |          |
|-----------------|----------------------------------------------------------|----------|
| DHKNVMARWYPUJF  | CCC1=CC2=C(S1)N=CN=C2N3CCN(CC3)C4=NN=C(CC)S4             | 0.226946 |
| DHMMQFBVMCMNCO  | FC1=CC(CN2CCN3CCCC3C2C4CCCC4)=CC=C1                      | 0.269176 |
| DHNWBWEYLRLFHM  | CCN(CC)C1=CC=C(C=C1)\C=N\O                               | 0.234262 |
| DHXSBDLDCWKDPQ  | CCN(CCNC(=O)NC1=CC=C(Cl)C=C1)C2=CC=CC=C2                 | 0.234881 |
| DIEHCOWDEVPAM   | CNC(S)=N\N=C(/C)C1=CC(C)=C(C)C=C1                        | 0.272506 |
| DIRHJRWJLBCERZ  | FC1=CC=C(C=C1)N2CCN(CC3=CN=C3C4=CC=C(F)C=C4)CC2          | 0.276391 |
| DIWDJLXPQLNOOB  | COC1=C(CN2CCN(CC3=CC=CC=C3)CC2)C4=C(C=CC=C4)C=C1         | 0.29878  |
| DJQKPIFCGBTKDP  | COC1=CC(=CC(OC)=C1OC)C(=O)NCC(N2CCC3=C2C=CC=C3)C4=       | 0.242341 |
| DJXXAAZCZQAFBJ  | CC(C)C1=C(C)C=C(OCCOCCN2CCCC2)C=C1                       | 0.246021 |
| DKEZYKPYNGDETM  | CC1=CC=C(SC2=C(C=C(CN3CCCC3)C=C2)[N+][[O-]]=O)C=C1       | 0.232049 |
| DKJLSDBYIWDWRK  | ClC1=CC=C(C=C1)C2=NC3=C(O2)C=CC(CN4CCCC4)=C3             | 0.278155 |
| DKKIFPJZIAESRV  | COC1=CC=C(C[N]2N=NN=C2C(N3CCN(CC3)C4=CC(=CC=C4)Cl)       | 0.224872 |
| DKNMWSHHJHRNMX  | ClC1=CC=C(NC(=O)NCC2CCN(CC3=CC(Cl)=CC=C3)CC2)C=C1        | 0.234966 |
| DMGILJRCIFDWJJ  | CC1=NC(NCC2=CC=CC=C2)=NC(N\N=C\3=CC=C(Cl)C=C3)=C1        | 0.235455 |
| DMRMUHYCIYWJAU  | C(N1CCN(CC1)C(C2=CC=CC=C2)C3=CC=CC=C3)C4=NN=NN4C5        | 0.286486 |
| DMTDVNHYYWDIHE  | CCN1CCN(CC1)C2=NC(C3=CC Enamine, T5595253                | 0.275922 |
| DMWDZPMAUFSSIX  | COC1=CC=CC(=C1OC)CN2CCN(CC2)C3=CC=CC=C3OC                | 0.234405 |
| DNFBNGGPAMFYIV  | CCCOP(=O)(OCCC)C1=C(NCC2=CC=CC=C2)OC(=N1)C3=CC=CC=C      | 0.222797 |
| DNTYWICAROEIIR  | CC1=CC(OCC2=NC3=C(N2)C=CC=C3)=C(C)C=C1                   | 0.231769 |
| DOKQGIRVWSSXKL  | COCCC\N=C(/S)NCCCNC1=C(C=C2C(C)=CC(C)=CC2=N1)C#N         | 0.223333 |
| DOOBXNPTUKTSNY  | ClC1=NC(CN2CCCC2)=NC3=C1C4=C(CCC4)S3                     | 0.243598 |
| DOUCZHOFEMSYAG  | CN1CCN(CCCN(CC2=CC=CS2)C(\S)=N\3=C(C)C=CC(Cl)=C3)CC1     | 0.255972 |
| DOXLERIYHMSOMJ  | CCN(CC)CCC(=O)NC1=CC2=C(CCC3=C(C=CC=C3)N2C(=O)CN(CC      | 0.225268 |
| DPHOJHQHHHIQCL  | CN1C=C(CNCC2=CN=C3C=CC=CN23)C(=N1)C4=CC=C(OC5=CC=C       | 0.264586 |
| DPYHNEPEJIWDCT  | CCC(C)C1=CC=C(OCCCCN2CCOCC2)C=C1                         | 0.239158 |
| DQKQMQQAJZCKTQ  | COC1=C(OCC2=CC=CC=C2)C=CC(=C1)C(=O)NCC3(CCCCC3)N(C)      | 0.232661 |
| DREJKENLGOKNAZ  | CCN1CCN(CC1)C2=C3C=CC=CC3=NC(=N2)C4=CC=CC=C4             | 0.279088 |
| DRFOYVAYXQSPB   | CN(C)C1=CC(Cl)=C(\C=N\NC(=O)C2=C3C=CC=CC3=CC=C2)C=C1     | 0.25259  |
| DRIGLOHKSIRHTN  | CCN1CCN(CC1)C2=NC=C(C(=O)NC3=CC(=CC=C3OC)Cl)C4=CC=C      | 0.237371 |
| DRLOMTNFDAXLP   | BrC1=CC=C(S1)C(=O)CN2C(=N)N(CC=C)C3=C2C=CC=C3            | 0.268558 |
| DRNLODMFWUMQSP  | NC(S)=NN=C1CCCCCCCC1                                     | 0.226479 |
| DRPQDKIQVZBZQF  | C(NC1=N/C(=N\C2=C\C=C/C=C\1\2)/C3=C/C=C\N=C/3)C4CCCC     | 0.236878 |
| DRUMPVMKOJHDRC  | C1CN2C=C(C3=CC=CC=C3)[N+](=C2S1)C4=CC=CC=C4              | 0.222801 |
| DSMKQBURCDVYOU  | C\C(CC(C)(C)N1CC1)=N/NC(=O)NC2=C3C=CC=CC3=CC=C2          | 0.234896 |
| DSWJVWIYKYRPS   | CN(C)CCN1=C(N=C(COC2=CC=C(C=C2)C3=CC=CC=C3)O1)C#N        | 0.23342  |
| DTWXHGYNVUCCSA  | CN(C)C1=C(C=NC(=N1)C2=CC=CC=C2)S(=O)(=O)C3=CC=CC=C3      | 0.234577 |
| DTYPZBRQTBSMGX  | COC1=C(OCC2=CN=C(Cl)C=C2)C=CC(CNCCC3=C(F)C=CC=C3)=C      | 0.290349 |
| DUJGQCJQVKGBBA  | [O-][N+](=O)C1=CC=C(N\N=C\C2=CC(=CC=C2)[N+][[O-]]=O)C=C1 | 0.26265  |
| DUKVGVACMPFMCR  | COC1=CC(=CC(OC)=C1OC)C(=O)N2CCN(CC2)C3=CC=C(C)C=C3C      | 0.24683  |
| DUXONKOEFSZBRM  | CCN(CC)C1CC2=C(C=CC=C2)N(C(=O)N(CC)CC)C3=C1C=CC=C3       | 0.265463 |
| DVLUMXSRCLLMQ   | CN(C)CC1=C(SC2=CC3=C(CCCC3)C=C2)C=CC=C1                  | 0.271961 |
| DVNGUIAUHYPPNY  | [O-][N+](=O)C1=CC=C(C=C1)C2=CSC(NN=C3CCCC3)=N2           | 0.257147 |
| DVZLRSRQJCWUDR  | CCOC1=CC=C(NS(=O)(=O)C2=CC=C(C=C2)C(=O)N3CCCC(C)C3)C     | 0.233035 |
| DWEHQOULYWLDKU  | COC1=C(OCC2=C(F)C=CC=C2)C(Br)=CC(\C=N\N=C(/N)S)=C1       | 0.225147 |
| DWKHSHKYUERWFEQ | ClC1=CC=C(C=C1)C2=NN(CC(=O)NCCC3CCN(CC4=CC=CC=C4))       | 0.229114 |
| DWMKFHNGYSTTPN  | CN1C=NC(=C1OC2=C3C=CC=CC3=CC=C2)[N+][[O-]]=O             | 0.22369  |
| DWOMXKJFILUXON  | C(N1CCN(CC1)C2CCCSC3=C2C=CC=C3)C4=CC=CC=C4               | 0.283428 |
| DWZFYKRGLXCPJR  | COCC\N=C(/S)N(CCC1=C(C)NC2=C1C=C(Cl)C=C2)CC3=CC=CS3      | 0.224178 |

|                 |                                                        |          |
|-----------------|--------------------------------------------------------|----------|
| DXCJPVMSHPSMOJ  | COC1=C(NC(=O)NC2=C(C)C(=CC=C2)[N+](O-)=O)C=C(Cl)C=C1   | 0.231603 |
| DXRCBRDEXSOCGK  | CNC(S)=N\N=C(/C)C1=CC(Cl)=C(Cl)C=C1                    | 0.222451 |
| DYHFAXLRWJHHNW  | CC1=CC=C(C(=C1)[N+](=O)[O-])OCC2=CC(=CC=C2OC)C=NNS(=O) | 0.236306 |
| DYVNGQCNSFPQKG  | CN(C)CCOCCOC1=C(Cl)C=C(Cl)C=C1C                        | 0.228782 |
| DZGRLYLKYCPFRS  | CCOC1=C(CN2CCN(CC3=CC4=C(N3)C=CC=C4)CC2CCO)C=CC=C      | 0.232523 |
| DZMNESXMQJGKKI  | COC1=C(OC)C(CN2CCC(CC2)N(CCC3=CC=CC=C3)CC4=CC=CC=C     | 0.228644 |
| DZXOAZAYQQTNL   | CN1N=C(C)C(CCNS(=O)(=O)C2=CC=C(F)C=C2)=C1OC3=CC=CC=C   | 0.228669 |
| FAHCSUHPPAUHAJ  | CC1C2=CC(=C(C=C2CCN1CC3=CC(=CC=C3OC)C4C5=C(C6=CC=C     | 0.226467 |
| FAIMXTPBTXEZOU  | COC1=CC=C(C=C1)N=C(S)N(CCC2=C(C)NC3=C2C=C(C)C=C3)CC4   | 0.22317  |
| FAONSHXBPKBFFM  | ClC1=CC2=C(C=C1)N=NN=C2C3=CC=CC=C3                     | 0.225222 |
| FAVNEIQETLCCMJ  | COC1=C(OC)C=C(C=C1)C2CCCN2\C(S)=N\C3=CC(Cl)=C(C)C=C3   | 0.222572 |
| FBDXJTMJDJGBLQ  | CC1=C(C=CC=C1)\N=C(/S)N2CCN(CC2)C3=C(Cl)C=CC=C3        | 0.247313 |
| FBFXKSNSAZWILX  | COC1=CC(NC(=O)CN2CCCC2)=C(OC)C=C1NC(=O)C3=C(F)C=CC     | 0.225634 |
| FBNFOLOPSHLEV   | CN1CCN(CC1)C2=C(NC(=O)C3=CC=C(OCC4=CC=CC=C4)C=C3)C=    | 0.237402 |
| FBGUSGCVXYLMEC  | NC(N)=N\N=C\C1=CC=C(F)C=C1)C2=CC=C(C=C2)C(F)(F)F       | 0.270413 |
| FBXCANGVJBRBNR  | COCCN1CCN(CC1)C2=CC(=NC=3N2N=C(C3)C4=CC=CC(=C4)F)C     | 0.23319  |
| FBZAJSFJQICZTP  | COC1=CC(=CC(=C1OC)OC)C2=NOC(=N2)C3=CC=CS3              | 0.24484  |
| FCMGAQVDVZZVMS  | CN1CCN(CC1)/C=N/C2=C(C3=C(S2)CCCC3)C#N                 | 0.228326 |
| FCVKDGDZUJYPSH  | COC1=CC=C(C=C1OC)C2=NC(=C(O2)N3CCOCC3)C#N              | 0.225593 |
| FDOSEIDYURVHEG  | N1N=C(N=C1C2=CC=CC=C2)C3=NC=CC=C3                      | 0.2382   |
| FDQPXONIZUKKOP  | CCCC(N1CCN(CC1)C2=C(OC)C=CC=C2)C3=NN=NN3CC4=CC=C(      | 0.256658 |
| FEIPKKUNQNPRSR  | ClC1=CC2=C(C=C1)C(N\N=C\C3=C(Br)C=CC=C3)=CC=N2         | 0.228784 |
| FEJOLHSHKJVETA  | CC1CCCN(CCC(=O)NC2=CC=C(Br)C=C2)C1                     | 0.244105 |
| FEMGCABIWSZTCY  | COC1=C(OC)C=C(C=C1)C2=NC(CN3CCC(CC3)C4=CC=CC=C4)=C(    | 0.260213 |
| FEMIEKUWTKIHRN  | CCN(CC)C1OC2=C(C=C3OCOC3=C2)C(C1C)C4=CC(OC)=C(OC)C(    | 0.279664 |
| FENXQLVGXFEBTI  | CC(=O)OC1=C(C(NC(=O)CC2=CC=CC=C2)C3=C(Cl)C=CC=C3)C4=(  | 0.225635 |
| FEPLCODWFOEWGR  | C=CCNC1=NC(=C(C#N)C2=C1CN(CC2)CC3=CC=CC=C3)N4CCCC(     | 0.227234 |
| FEQNWINUVOBUMS  | CCOC1=CC=C(NC2=C(N=C(O2)Vitas-M Laboratory,STK896245   | 0.239817 |
| FEYIQDUSEQEAQQ  | CCN1N=NC(=N1)C2=C(NC(=O)C3=CC(OC)=C(OC)C(OC)=C3)C=CC   | 0.222422 |
| FGANKVPJYTWBHR  | ClC1=CC=CC(=C1C[N]2C=NC3=C(N=CN=C23)N4CCCCC4)Cl        | 0.224797 |
| FHRGNLSZHKOTAT  | COC1=CC=C(C=C1)N=C(S)N(CCCN2CCCC2)CC3=CC=CS3           | 0.226754 |
| FIMZBUXFQJCLW   | FC1=C(C=CC=C1)N2CCN(CC3CC4CC3C=C4)CC2                  | 0.229791 |
| FIRQIZRGCGBDIR  | COC1=CC(C(N2CCN(CC2)C3=C(F)C=CC=C3)C4=NN=NN4C5CCC(     | 0.27021  |
| FIRVQBUFVTUCCI  | CC1=NC2=C(C=CC=C2OCCOC3=C(F)C=CC=C3)C=C1               | 0.225962 |
| FJAKLMISLRNGKE  | COC1=CC=C(C=C1)N2CCN(CC2)C(C3=NN=NN3C4CCCC4)C5=C(      | 0.225388 |
| FJBYQCDEDRMELR  | COC1=CC=C(OC)C(=C1)C(N2CCC3=CC=CC=C3C2)C4=NN=N[N]4     | 0.248204 |
| FJDNIGBGUJFUDB  | SC(=NCCCC1=CC=CC=C1)N2CCN(CC2)C34CC5CC(CC(C5)C3)C4     | 0.2331   |
| FJNLHZWCZQSEM   | CN1N=C(C)C(CN(CC2=C(C)OC(=N2)C3=C(F)C=CC(F)=C3)C4CC4)= | 0.280836 |
| FJSBOKGZRDNR    | CCN1CCN(CC1)C(=O)C2=C3C=CC=C4C(=O)N(C(=O)C(C=C2)=C34   | 0.225566 |
| FKFYQEWXJSWQAT  | COC1=CC(=CC(OC)=C1OC)C(=O)N\N=C\C2=C(C)C=CS2           | 0.250004 |
| FKIJJURFHQMUIJL | CCC(N(CC1=CC=CS1)CC2=CC3=CC(C)=CC=C3NC2=O)C4=NN=NN     | 0.23883  |
| FKMZPBSNNGNDGN  | CN1CCN(CC1)C2=CC=C(NC(=O)COC3=CC4=C(C=CC=C4)C=C3)C=    | 0.270037 |
| FLJGGKMZWAHJCQ  | CC1=NC(=CC(N\N=C\C2=CC=C(Br)C=C2)=N1)N3CCOCC3          | 0.25911  |
| FMADPVXRTFIHAS  | FC1=C(C=CC=C1)N2CCN(CC2)C(=O)C(SC3=CC=CC=C3)C4=CC=C(   | 0.228977 |
| FMEALALYOZMLJI  | CN1CCN(CC1)C2=NC(=NC=C2F)N3CCN(CC3)C4=CC=CC=C4         | 0.245931 |
| FMJZREWCDZABCY  | N=C1C2=C(CCC2)N(C3=CC=CC=C3)C4=C1CCC4                  | 0.246082 |
| FNICKYKABLLSJL  | CCN(C1=CC=CC=C1)S(=O)(=O)C2=CC(OC)=C(N)C=C2            | 0.248817 |
| FNKHNBXJOKKZGR  | COC1=C(C)C(C)=C(CN2CCC(CC3=CC=CC=C3)CC2)C=C1           | 0.315832 |

|                 |                                                           |          |
|-----------------|-----------------------------------------------------------|----------|
| FNPLGUOFZNEW CZ | CCCN(CCC)C(S)=NC(=O)C1=CC=C(C=C1)C2=CC=CC=C2              | 0.223817 |
| FOAQRHEMCKCECH  | CC1=C(C(=O)ON=C(N)C2=CC=CC=C2)C(=NO1)C3=C(Cl)C=CC=C3      | 0.242067 |
| FOBWHVBAUPMWAP  | CC1=CC(C)=C(C=C1)N2N=CC3=C2N=CN=C3SCC4=CN=CC=C4           | 0.222844 |
| FOCRVTZMMYEUOF  | COCCNCCOC1=CC=C(C=C1)C(C)(C)C2=CC=CC=C2                   | 0.259777 |
| FOGDQAOHTOYVSF  | CNCCCOC1=CC(OC(C)C)=CC=C1                                 | 0.241793 |
| FORFCNAFUW TYPN | CN1CCN(CC1)\N=C\C2=C3C=CC=CC3=C(Cl)C4=CC=CC=C24           | 0.22839  |
| FOWCHVLUWQUTGX  | CCOC(=O)C2(CCC1=CC=CC=C1)CCN(CC3=CC4=C(OCCO4)C=C3)        | 0.244436 |
| FPINGFDOQFIVJE  | CCN(CCNC(=O)C1CCN(CC2=C(C)OC(=N2)C3=CC=C(Cl)C=C3)CC1      | 0.22433  |
| FPJCKMLPYYNAN   | FC1=C(\C=N\N2CCN(CC3=C(Cl)C=CC=C3)CC2)C=CC=C1             | 0.249317 |
| FPRXCNSGMDHDM   | NC(=NOC(=O)C1=CC2=C(C=CC=C2)C=C1)C3=CN=CC=C3              | 0.224914 |
| FQIBZBRPAORTIW  | CN(C)CCNC1=C2C=CC=CC2=NC(=N1)C3=CC=C(Cl)C=C3              | 0.227925 |
| FQXIH YRHMIGVLB | COC1=CC=C(C=C1)N2CCN(CC2)C3=C4C=C(OC)C=CC4=NC=C3S(        | 0.225272 |
| FRHSRBZOZ FJKHM | CC(=O)N1CCN(CC1)C2=NC(=N Enamine, T5282149                | 0.252855 |
| FRVKAMAPGDOAOR  | FC(F)(F)C1=CC(OCCN2CCN(CC3=CC=CC=C3)CC2)=CC=C1            | 0.236173 |
| FSCHTKXZGZZBEI  | CC1=C(C)C2=C(S1)N=CN=C2N3CCN(CCO4=CC=C(C)C=C4)CC3         | 0.22336  |
| FSKOZAKNLVZSJY  | CN1CCN(CC1)\N=C\C2=C(C)N(C(C)=C2)C3=CC=C(Cl)C=C3          | 0.29976  |
| FSLNQLUXMDYMQS  | CC(C)(C)NC1=NC(NC2=CC=CC=C2)=NC(Cl)=N1                    | 0.223047 |
| FSMSIQBJGBFHOD  | CC(C)[C@H](NC(=O)C1=C(Cl)C=C(C=C1)[N+](=[O-])=O)C(=O)N2CC | 0.227679 |
| FSTUGIAOYRQVER  | COC1=CC(C)=C(C(=O)CC(=O)C2=C(C)C=C(OC)C=C2)C(C)=C1        | 0.226373 |
| FTCZSQZSQPLFK   | CN(CC(=O)NC1=C(C(N)=O)C2=C(CCC2)S1)CC(=O)NC3=CC=C(C)C     | 0.226939 |
| FTNZGDP EMBMSRL | CN(C1=CC=C(OCC2=NN=C(O2)C3=CC=CC=C3)C=C1)S(=O)(=O)C4      | 0.227752 |
| FTVOQPHLIRK GNE | [O-][N+](=O)C1=C(\C=N\NC2=CC=CC=C2)C=CC=C1                | 0.25689  |
| FUDFOMIUCNYRPS  | O=C(\C(=N\NC1=CC=CC=C1)C2=CC=CC=C2)C3=CC=CC=C3            | 0.247611 |
| FULWIWRWOXIENS  | CCN1CCN(CC1)C2=NC3=C(C=C(C=C3)N=C(S)N4CCN(CC4)C5=C(       | 0.228854 |
| FVBRWQIUJUHLKQ  | CC1=CC(C)=NC(=N1)\N=C(/N)NCCC2=CC=CC=C2                   | 0.269376 |
| FVMDKJMUUVLQFT  | C(N1CCN(CC1)C2=NC3=C(C=CC=C3)C(=N2)N4CCOCC4)C5=CC=        | 0.238503 |
| FVMHRIIKBTULDQ  | CC(CN1CCNCC1)(NS(=O)(=O)C2=CC=CC=C2)C3=CC=CC=C3           | 0.27069  |
| FVXJBIBSUXZZOB  | CSC1=CC=C(CN2CCC(CC2)N3N=CC=C3NC(=O)CCCC4=CC=CC=C         | 0.240291 |
| FWMDRV RWLSQQKS | CCOC(=O)C1=C(N2CCN(CC2)C3=NC=CC=C3)C4=C(N=C1)C(OC)=       | 0.245263 |
| FWMGJOMHHMSLRH  | CCOC(=O)C1=C(C)C(C(=O)OCC)=C(NC(=O)CCN2CCCCC2)S1          | 0.234276 |
| FWOQORGCRAJKQQ  | CCN1CCN(CC1)C2=NC3=C(C=C(C=C3)N=C(S)NCCN(C)C)C(C)=C2      | 0.257098 |
| FWTUXKISATUREG  | CCN(CC)CCCN(C(C)=O)C1=NC(=CS1)C2=CC(=CC=C2OC)OC           | 0.243156 |
| FXBWUMYZDFNSIT  | CCOC1=C(O)C(CN2CCCC(C2)N3CCC4=C(C3)C=CC=C4)=CC=C1         | 0.255796 |
| FXEQPMSYJAWBQO  | COC1=CC=C(Cl)C(=C1)N2CCN(CCCNC(=O)NC3=CC=C(C)C=C3)C(      | 0.244616 |
| FXGLYTICQZTCBR  | NN1C(CC2=C3C=CC=CC3=CC=C2)=NN=C1SCCO4=CC=C(Br)C=          | 0.226572 |
| FXHJIMQXQWJNSM  | [O-][N+](=O)C1=NN(C2=CC3=C(OCCO3)C=C2)[N+](=[O-])=C1NC4=  | 0.22461  |
| FXIXZADJVWSXHM  | COC1=C(NC(=O)C2=C(Cl)C=CC=C2)C=CC(NC(=O)C3=CC=CO3)=C      | 0.229207 |
| FXJAEQYVUIYOGT  | COCCNCCCCOC1=C(C=CC=C1)C2=CC=CC=C2                        | 0.251226 |
| FXJLTMMMLBWKDB  | FC1=C(CN2CCCN(C2)C(\S)=N\C3=CC(Cl)=CC=C3)C=CC=C1          | 0.292759 |
| FXODFKSCTMISKJ  | CCOC(=O)C2(CCO1=CC=CC=C1)CCN(CC3=C(Cl)C=C(O)C(OC)=C       | 0.223814 |
| FYIPNJMDLPBTAZ  | [O-][N+](=O)C1=CC(=CC=C1)C(=O)ON=C2CCCCN2                 | 0.266227 |
| FYLQXNREZWACS   | CCN1C(=S)N(CC(=O)NCCC2=CC=CC=C2)N=C1C3=CC=C(C)C=C3        | 0.224815 |
| FZKZQIQMQNHFF   | CC(C)CCN(C(C)C1=CC=NC=C1)C(\S)=N\C2=C(Cl)C=C(C)C=C2       | 0.253926 |
| FZOIGUDNUCIBHK  | COC1=CC(NC(=O)CN(C)CC(=O)NC2=C(Br)C=CC=C2)=C(OC)C=C1      | 0.237241 |
| GBEICOCUEFDHJG  | COC1=CC=C(C=C1)C(N2CCN(CC2)C3CCCC3)C4=NN=N[N]4CCC         | 0.251662 |
| GBSMJQFLFZCWRI  | COC1=CC=C(C=C1)N2CCN(CCCNC(=O)CCC(=O)N3CCOC4=C3C=         | 0.22662  |
| GBTWBJLHCODVDI  | COC1=C(OC)C(CNC2=NC3=C(C=CC=C3)N2CCN4CCCC4)=CC=C          | 0.229211 |
| GBZVAFHGNJO CMQ | CCN(CC)C(=O)OC1=C2C=CC=CC2=C(Br)C=C1                      | 0.234698 |

|                 |                                                        |          |
|-----------------|--------------------------------------------------------|----------|
| GCVLEBDECBRVJQ  | CC(COC1=CC=CC=C1)N2CCC(CO)(CCC3=CC=CC=C3)CC2           | 0.225569 |
| GCWVFAKIMDGKKD  | CCOC(=O)C=C1C2=CC(=CC=C2OC1CN3CCCCC3)OC                | 0.230634 |
| GCZMZXAUIJZPUNB | CN1C(CSCC2=CC=C(F)C=C2)=NN=C1SCC(=O)N3CCN(CC3)C4=C(C   | 0.222432 |
| GDPMPIOBOVLEFC  | COC1=C(OC)C=C(C=C1)C2=NC3=C(C=CC=C3)C(=C2)C(=O)NCC(N   | 0.237672 |
| GEACFDKUFUTDHQ  | CCOC1=CC2=C(C=C1)N=C(CN3CCN(CC4=C(OCC)C=CC=C4)C(CC     | 0.237733 |
| GECZCJFICUIMSI  | COC(=O)C1=C(CN2CCN(CC2)C3=C(C)C=CC=C3C)C(=CC=C1)[N+](  | 0.223136 |
| GEMVZPHXNBWWMU  | CCN(CC)C1=CC=C(\C=N\N=C(/S)NCC2=CC=CC=C2)C=C1          | 0.224972 |
| GEQNCGFQSPMLJV  | CN(C)C1=CC=C(C=C1)C(=O)OCC2=CC=C(Br)C=C2               | 0.243033 |
| GERMESKNXWUMHU  | COC1=CC=C(CN2CSC(=S)N(CC3=CC=CC=C3)C2)C=C1             | 0.247558 |
| GERPWQVNLHBOO   | COC1=CC(OC)=C(C=C1)\N=C(/S)NCC2=C(Cl)C=CC=C2           | 0.222553 |
| GFBPVKIACSQGE   | CC1=NC(SCC2=NN=C(O2)C3=CC=CC=C3)=C(C#N)C(C)=C1         | 0.236527 |
| GDFDIMKBMBRKCK  | [O-][N+](=O)C1=CC=C(C=C1)C(C2=CC=C(C=C2)[N+](O)C3=C    | 0.346202 |
| GFJNNGKTSOPVAY  | ClC1=CC=C(C=C1)C2=C[N]3CCCC3=N2                        | 0.230855 |
| GFUVCRKEKDTQLI  | C\C(=N/N1CCN(CC1)C2=CC=C(Cl)C=C2)C3=CC(=CC=C3)[N+](O-  | 0.248697 |
| GFUXOVBMILUFAl  | CCOC(=O)C1=C(CN2CCC(C)CC2)OC3=C1C=C(OC)C=C3            | 0.238342 |
| GFWQVGZOCSTMLG  | CN(C)C1=CC=C(\C=N\OC(=O)NC2=CC=CC=C2)C=C1              | 0.225873 |
| GGBKVCLOHXJYCD  | ClC1=CC=C(C=C1)C(=O)NC2=NC3=C(C=CC=C3)N2CCN4CCCC4      | 0.227795 |
| GGIWODNVLZJOOT  | CN(CC1=CC=C(OC(F)F)C=C1)C(=O)C2=CC(=CC=C2)S(=O)(=O)N3C | 0.242122 |
| GGNVUUYFBLWSNA  | FC1=CC=C(C=C1)C2=CSC(=N2)N3CCC(C3)C4=CC=CC=C4          | 0.222429 |
| GGOPXJDIHLBUFA  | COC1=C(CN2CCCC(C2)C(=O)C3=C(OC)C=CC=C3)C=CC=C1         | 0.281938 |
| GGUSVJNBCCGLN   | COC1=CC=C(C=C1OC)C2\N=C(\C3=CC=CC=C3)C(C)(C)N2O        | 0.244282 |
| GIIGIGNNZPCHTH  | COC1=CC=C(C=C1)C(OCC(O)CNC(C)C2=CC=CC=C2)C3=CC=C(OC    | 0.246547 |
| GIJMFAXZRUVIID  | CS(=O)C1=C(C#N)C(=CC(=N1)C2=CC=C(Br)C=C2)C3=CC=CC=C3   | 0.223011 |
| GIWODWVYEOAGQV  | COC1=C(C=CC=C1)N2CCN(CCC3=CNC4=C3C=C5OCOC5=C4)CC       | 0.233657 |
| GJBMKWRVTJKJMB  | CC1=NC2=C(C(=N[N]2)C(=C1)NCCCN3CCOCC3)C4=CC=C(F)C=C    | 0.242367 |
| GJDUWIZZYNPMPM  | COC1=CC(CN(C)CC2=CC=CC=C2)=CC(OC)=C1O                  | 0.224323 |
| GJTJFBHITMENPA  | CCC1=NC(C)=CN1S(=O)(=O)C2=C(Cl)C=CC(=C2)[N+](O)C3=C    | 0.223281 |
| GLHFLADPKLAAEW  | CN1CCN(CC1)C2CC3=C(SC4=C2C=CC(F)=C4)C=CC(Cl)=C3        | 0.324472 |
| GMGOWYUFAKEZNV  | CC1=CC(CN2CCCC(C2)C(=O)C3=CC4=C(OCO4)C=C3)=C(C=C1)N    | 0.245182 |
| GMHDMQBFGWPQNB  | CN1CCN(CC1)C2=CC=CC=C2NC(=O)C3=CC=CC(=C3)OCC4=CC=C     | 0.23196  |
| GMKWAECOPLCWIU  | CCN1C=C(CNC(=O)C2=NOC(COC3=C(Cl)C=C(F)C=C3)=C2)C=N1    | 0.228509 |
| GMZKPSNHHJCDHS  | NC1=C2CCCCC2=NC3=C1C4=C(CCCCC4)S3                      | 0.22569  |
| GNERZWOWHNEPQY  | COC1=CC=C(C)C2=C1N=C(S2)N(CCCN(C)C)C(=O)C3=CC4=C(OCC   | 0.259342 |
| GNEYUFAQVQXLDT  | CN(CC1CCCN(CCC2=CC(=CC=C2)C(F)(F)F)C1)CC3=CC=C(NC(C)=  | 0.244021 |
| GNQPUMLOPMZMFD  | CCN(CC)S(=O)(=O)C1=CC(NC(=O)CCSC2=CC=C(Cl)C=C2)=CC=C1  | 0.224485 |
| GNUBRPMYIYQREU  | O=C(COC1=C2C=CC=CC2=CC=C1)N3C4=C(CCC5=C3C=CC=C5)C      | 0.234402 |
| GNYVZJXAVMJYCL  | ClC1=C(CN2CCC(CC3=CC=CC=C3)CC2)C=CC=C1                 | 0.245649 |
| GNZNPBWUFBQNO   | COC1=CC(OC)=C(C=C1)C(=O)ON=C(N)C2=NC=CC=C2             | 0.244099 |
| GOTFOTVSQWHRPI  | C1CN(CC2=NN=C(O2)C3=CC=CC=C3)C4=CC=CC=C4C1             | 0.236154 |
| GOUYUKOYEGKQEP  | CC(C)(C)CN1CCN(CC2=NC(=CS2)C3=CC=C(F)C=C3)CC1CCO       | 0.2497   |
| GOYZZBUIRKBKF   | ClC1=CC(SC2=NC3=C(C=CC=C3)C(=C2)C(=O)NCC4=CN=CC=C4)=   | 0.223758 |
| GPHKEFTVUJXMFE  | CC1=C(C=C(Cl)C=C1)\N=C(/S)\N=C\2=C3C=CC=CC3=CC=C2      | 0.230966 |
| GPZVOIQOWJGZNX  | CC1=C(NS(=O)(=O)C2=CC=CC=C2)C=CC(=C1Cl)[N+](O)C3=C     | 0.239033 |
| GQTJICULGXVQYFK | CN1CCN(COC2=CC=C(CC3=CC=CC=C3)C=C2)CC1                 | 0.311654 |
| GQYYPZGNULJLX   | OCCN1CCN(CC#CCN2C3=C(C=CC=C3)C4=C2C=CC=C4)CC1          | 0.231664 |
| GRECSEGRAXDXTR  | CN1CCN(CC2=CC=C(OCC3=CC=CC=C3)C=C2)CC1                 | 0.266045 |
| GRPWIUUZNMITRR  | CN1CCN(CC1)C2=C(C=CC(=C2)N3CCNCC3)[N+](O)C3=C          | 0.319182 |
| GRWSQAQXMPBGJF  | CCOC(=O)C1=C(C)OC2=C1C=C(OCC3=C(C)OC(=C3)C(=O)OC)C=C   | 0.223047 |

|                 |                                                          |          |
|-----------------|----------------------------------------------------------|----------|
| GRXZPUPSNRQSLN  | CC1=CC(CN2C=C(C=O)C3=C2C=CC=C3)=CC=C1                    | 0.233392 |
| GSAAGSUVRWCSLI  | CCOC(=O)C2(CCC1=CC=CC=C1)CCN(CC3=CN=C(S3)N(C)C)CC2       | 0.239368 |
| GSDKCMWRUKEVLN  | CC(C)C1=NC(=CS1)C(=O)N2CCCC(C2)N3CCN(CC3)C4=CC(CI)=CC    | 0.222675 |
| GSMKCRRJOLCONI  | COC1=CC(OC)=C(CN2CCN(CC3=CC=C(C)C=C3)CC2)C=C1            | 0.282398 |
| GSSRESKKVSYJBV  | CCOC(=O)C1=C(C)N(N=C1C)C2=CC=C(NC(=O)C3=CC=CS3)C=C2      | 0.252283 |
| GSTUWJWXDCPWJC  | COC1=CC(NC(=O)C2=CC=CC(C Asinex Ltd.,ASN 05211794        | 0.235008 |
| GTDGCZAGEYQBAY  | CC1CCCN(CCOCCSC2=CC=CC=C2)C1                             | 0.275778 |
| GTERTOOLLXWSZ   | COC1=CC=C(NS(=O)(=O)C2=C(CI)C=CC(N\C(=N\S(=O)(=O)C3=CC:  | 0.223055 |
| GTLWHVUWUKACHV  | CC(C)(C)C1=CC=C(C=C1)\C=N\N=C(/S)NCC=C                   | 0.236091 |
| GUAXLFYUHSZDEJ  | CC1=C(C=CC=C1)\N=C(/S)NCC2=CC=CC=C2                      | 0.244539 |
| GUDCJDDWCVHWCJ  | CSC1=NC=C(CN2CCC(CC2)C(=O)NC3=CC(=CC=C3)C4=CSC=N4)C      | 0.229672 |
| GUFALNAJWRRFDJ  | ClC1=CC=C(CCN(C(=O)NC2=CC(CI)=CC=C2)C=C1                 | 0.229109 |
| GUHVLTSSVAHUPR  | CN(C)C1=CC=C(\C=N\C2=CC(=NN2C3=CC=CC=C3)C4=CC=CC=C       | 0.244955 |
| GUJLSPBIMKSORO  | COC1=C(OC)C=C(CCNCC2=CC=C(C=C2)C3=CC=CC=C3)C=C1          | 0.308041 |
| GUVDQOJQJFBGOG  | [O-][N+](=O)C1=CC=C(C=C1)N2CCN(CC2)C(\S)=N\C3=C(F)C=C(F) | 0.226033 |
| GVCAJCMWYITQHP  | COC1=CC=C(C=C1)C2=C(C#N)C(CI)=NC(=N2)C3=CC=CC=C3         | 0.228478 |
| GVHZDMRBDLOKDN  | CC(C)(CN1CCN(CC1)C2=CC=CC=C2)NS(=O)(=O)C3=CC=CC=C3       | 0.234912 |
| GVMJKGBKSBKKG   | COC1=CC(=CC(OC)=C1OC)C2=C3C=C(Br)C=CC3=NO2               | 0.239147 |
| GVUGEKWJLJBSME  | CC1=C(CS(=O)CC(=O)NCCN2CCCCC2)N=C(O1)C3=CC=C(CI)C=C      | 0.228558 |
| GVZJSCMVVSKDGI  | CCOC(=O)C1=C(C)C(C(=O)OCC)=C(CN2CCN(CC2)C3=CC=C(OC)C:    | 0.239275 |
| GWCMQHSUMBHFOV  | COC1=CC=C(C=C1)C(CNC(=O)C2=CC(NS(=O)(=O)C3=CC(F)=C(C)C   | 0.253214 |
| GWPBCLLSUFIEQ   | CC1=CC(\C=N\NC(=O)C2=CC=CS2)=C(C)N1C3=CC(C)=CC=C3        | 0.231212 |
| GWPVLAMALAXBBS  | CN(C)C1=CC=C(C=C(C2=NN=NN2C3=CC=CC=C3)C4=NN=NN4C5        | 0.230877 |
| GXIYXTKEJHCQKQ  | CCOC1=CC2=NC(=NC(=C2C=C1OC)N3CCOCC3)C4=CC=C(OC)C(:       | 0.226947 |
| GXOIDTTXZUMBPM  | C1CN(CCN1)C2=NC3=C(C=CC=C3)C(=N2)C4=CC=CC=C4             | 0.24425  |
| GXTQAAKFDCCZOW  | ClC1=C(C=CC=C1)C(N2CCN(CC3=CC=CO3)CC2)C4=NN=NN4CC!       | 0.229136 |
| GYZIRVEMCRRLN   | COC1=C(OC)C=C(CC2=NOC(CN(C)CC3=CC(=CC=C3)N4C=CC=N4       | 0.292673 |
| GZFKDIVFUIWLBN  | CN(C)C1=C2C=CC=CC2=C(NC(=O)CC3=CC=CC=C3)C=C1             | 0.247074 |
| GZSUOVWERIQSOD  | COC1=CC=C(N\C(C)=C\C2=[N+](C(=CS2)C3=CC=CC=C3)C4=CC=(    | 0.22546  |
| HADBTEMVDIMDLW  | COC1=CC=C(C=C1)C(CNC(=O)C2=CC(NS(=O)(=O)C3=CC(F)=C(C)C   | 0.224353 |
| HAIISKYDVPHGQW  | COC1=CC=C(C=C1)C2=NC(CN3CCN(CC4=CC(F)=CC=C4)CC3)=C(      | 0.229503 |
| HAJLSVZWWIZPKO  | CCC1=CC=C(C=C1)S(=O)(=O)N2C3CCN(C)CC3C4=C2C=CC(C)=C4     | 0.237509 |
| HBCOFKWCWJCOHJQ | COC1=CC=C(\C=N\N)2C(=NN=C2C3=CC=CC=C3)SC)C=C1C           | 0.228174 |
| HBDRUYIKYFKALI  | COC1=CC(CC2(CO)CCCN(CC3=CC4=C(N3)C=CC=C4)C2)=CC=C1       | 0.227727 |
| HBQNDKWJHWTOSZ  | C1CN=C(N1)C2C3=C(CSC4=C2C=CC=C4)C=CC=C3                  | 0.309989 |
| HBVIRPOPLIFNHY  | CCN(CC)C1=CC=C(C=C1)C(=O)OCC(=O)NC2=C(C=CC=C2)C3=CC=     | 0.230662 |
| HCAYDEBXAFFBPA  | CCOC1=CC=C(OCC2=CC=C(O2)C(=O)NC(C)(C)C)C=C1              | 0.230292 |
| HESAYFLMAHLMGI  | COC1=CC(OC)=C(C=C1)C(N2CCC(C)CC2)C3=NN=NN3C4CCCC4        | 0.24583  |
| HFKZYMPEMMAFOG  | ClC1=CC(=CC=C1)C2=NN=C(O2)C3=CC=CC=C3                    | 0.251292 |
| HFRAYEALNRDZAA  | CN(C)C1=C(N=C(O1)C2=CC=CC=C2Cl)C#N                       | 0.252926 |
| HFTBUYNKBJOJMS  | OC(COC1=CC=C(C=C1)[S+](O-)(=O)N2CCOCC2)CN3CCN(CC3)C      | 0.223463 |
| HFTYZLAWHVLZCM  | CCOC(=O)C2(CCCC1=CC=CC=C1)CCN(CC2)C3CCCC3                | 0.273099 |
| HGIDBTSZCANBC   | OC(COC1=CC=C2C=C(Br)C=CC2=C1)CN3CCCC3                    | 0.232547 |
| HGQYANJAVUDYOU  | O=S1(=O)CCS(=O)(=O)C1C2=CC=CC=C2                         | 0.257122 |
| HHLJKQAHDJERX   | CN1CCC2=C(C1)SC(NC(=O)COC3=CC4=C(C=CC=C4)C=C3)=N2        | 0.233893 |
| HHUNIUFQOPFKBB  | CCN1CCN(CCOC2=C(OCC3=CC=CC=C3)C=CC=C2)CC1                | 0.288044 |
| HHVHRBNNVYQGO   | COC1=CC=C(C=C1)C2CC(=NN2C(=O)CN3CCCC3)C4=CC=C(Br)C=      | 0.319311 |
| HXXBUEDUJDFQEA  | CCOC(=O)C1=NC2=C(C=CC=C2)C1=[N+]=[N-]                    | 0.225799 |

|                  |                                                         |          |
|------------------|---------------------------------------------------------|----------|
| HIELOUZGQULWCY   | CC1=C2CC(OC2=C3C=CC=CC3=N1)C(C)(Cl)Br                   | 0.224097 |
| HIGQBYWQSGFTR    | CCOC1=CC=C(C=C1)N2N=NN=C2C3=NC4=C(S3)C=CC=C4            | 0.22474  |
| HIHIGEUVECSANJ   | C1CCN(CC1)C2=NC(=NC(N\C=C\3=CNC4=C3C=CC=C4)=N2)N5       | 0.222611 |
| HIHZFTNEEQAKJI   | CCCN(CCC)C1=NC=NC2=C1C=NN2C3=CC=C(OC)C=C3               | 0.235778 |
| HIJNKVCALQPZDU   | CN1N=C(C2=CC=C(C=C2)C(=O)N3CCN(CC4=CC=CC=C4)CC3)C5=     | 0.224705 |
| HIWLGEQTJTUJIU   | CCN1C2=C(C=C(C)C=C2)C3=C1N=C(SCCN4CCCC4)N=N3            | 0.234117 |
| HIZVPOSTRMNMOK   | OC1=C(C=CC=C1)C2=NC(=NN2)C3=C(O)C=CC=C3                 | 0.222622 |
| HIZXBECURMQHTA   | COC1=CC(CN2CCN(CC2)C(=O)C3=CC=C(C=C3)C4=CC=CC=C4)=C     | 0.223186 |
| HJAPVMMMLKRVJSJW | CN(C)S(=O)(=O)C1=CC(Cl)=C(C=C1)N2CCN(CC2)S(=O)(=O)C3=CC | 0.247187 |
| HJUXGLLHBMPOHN   | O=C(NC1=CC=C(C=C1)N2CCOCC2)C3=C4C=CC=CC4=CC=C3          | 0.233315 |
| HKLVXLJTGPBFMX   | SC(NCC1=CC=C(Cl)C=C1)=NC2=CC=NC=C2                      | 0.228346 |
| HLARMCFCXXGSBI   | OC(C(N1CCOCC1)C2=CC=CC=C2)(C3=CC=CC=C3)C4=CC=C(F)C=     | 0.264265 |
| HLIKMPYBPSBSSF   | COC1=C(OC)C=C(CN2CCC(CC3=CC=CC=C3)CC2)C=C1              | 0.26018  |
| HLMDXVXISRHHOA   | CCN(CC)CCNC(=O)C1=CC=C(NC(=O)C2=CC=C(C=C2)S(=O)(=O)N3   | 0.240205 |
| HLTBWYWHWCSST    | COC1=CC=C(C=C1)N=C(S)N2CCN(C\C=C\C3=CC=CC=C3)CC2        | 0.237644 |
| HMLVFUWQWMPWKQ   | CC1C(N(C)C(C)C1(O)C#CC2=CC=CC=C2)C3=CC=CC=C3)C4=CC      | 0.223413 |
| HMWQYKGAJZEVGV   | CC1=CC(N)=CC(C)=C1C2=C(Br)C=C(N)C=C2Br                  | 0.23413  |
| HNDBTGRZKRHNHB   | CCOC1=CC2=C(NC(=N2)C3=CC=CC=C3)C=C1                     | 0.22592  |
| HNJQORNOYZWCSS   | BrC1=CC(CNCC2=CC=NC=C2)=C(OCC3=CC=CC=C3)C=C1            | 0.234992 |
| HNXVXXIPESJDSF   | CCN(CC)C1=CC=C(C=C1)C2NC(=O)C3=C(N2)C=CC=C3             | 0.225641 |
| HOABSRFVIVDIIQ   | ClC1=C(C=CC(NC(=O)C2=CC3=C(OCCO3)C=C2)=C1)N4CCCC4       | 0.226264 |
| HOSZHAPBMXUGHN   | BrC1=CC=C2OCCOCCOCCOC3=CC=C(Br)C=C3OCCOCCOC2=C1         | 0.238855 |
| HPBYXKYAIRHMX    | FC1=CC(=CC=C1)C2=CC(NC(=O)C3CCN(CC4CCOC4)CC3)=CC=C2     | 0.224    |
| HPEPXRUMTGVIPA   | CN(CC(=O)NC1=C(Cl)C=CC=C1)C(=O)C2=CC(=CC=C2)S(=O)(=O)N  | 0.224264 |
| HPGIERMBOVEBRN   | CC1=CC=C(C=C1)S(=O)(=O)NC2=C(C=CC=C2)N3CCOCC3           | 0.238855 |
| HQJNJFVKALQGS    | OCC1=C/C=C(\C=N\1)C(=O)NN=CC2=C(O)/C=C\C3=C\C=C/C=C\    | 0.223179 |
| HQSGVANNJFLMFK   | CC1=CC=C(OCCCN2CCC3=C(C2)C=CC=C3)C=C1                   | 0.251182 |
| HQVSYDCPHPKQMR   | CC1=CC=C(C=C1)C2=NN(C(C2)C3=C(F)C=CC=C3)C(=O)C4=C(F)C   | 0.228521 |
| HRAFYRYVAHBEW    | COC1=CC=C(C=C1)C2=NN(C=C2CO)C3=CC=CC=C3                 | 0.229553 |
| HRCITNWLOQMDGX   | C(N1CCN(CC1)C2=CC=CC=C2)C3=C4C=CC=CC4=NC=C3             | 0.237112 |
| HRTMRFLKYRRWRK   | CC1=CC(Br)=C(OCCCCCN2CCNCC2)C=C1                        | 0.248256 |
| HRWZLSGNASCXOO   | CN(C)CCCN(C=O)C1=CC=CO1)C2=NC3=C(S2)C=C(Cl)C=C3         | 0.277911 |
| HRZJKYJOXWGSPG   | COC1=CC=C(C=C1)C(N2CCN(CC2)C3=C(F)C=CC=C3)C4=NN=NN      | 0.269108 |
| HSOFMPNGAGDYGZ   | CCOC(=O)C1=CC(=NN1C2=CC=CC=C2)C3=CC=C(C=C3)N4CCOC       | 0.263362 |
| HTHMHMCMMLGKYFL  | CN1CCN(CC1)C(=O)NC23CC4CC(C2)CC(C4)(C3)C5=CC=C(C)C=C    | 0.246238 |
| HUSBTGWYEQTSSS   | CCOC(=O)C1=CC=C(C=C1)N=C(S)N(CCN(C)C)CC2=CC=CS2         | 0.232715 |
| HVHPQMBRWAKQKF   | CCOC(=O)C1=C(CN(C)C)N(C2=C1C=C(O)C(Br)=C2)C3=CC=C(C)C=  | 0.238977 |
| HVMDLOCSGFODDK   | CN(C)CCCN(C=O)C1=CC(C)=C(C)C=C1)C2=NC3=C(S2)C=C(Cl)C=   | 0.240672 |
| HWAVRYVDKATCPW   | C(CC12CC3CC(CC(C3)C1)C2)N4CCNC[C@@H]4CC5=CC=CC=C5       | 0.235792 |
| HWJWHNLIKCTRLU   | FC1=CC=C(C=C1)N2CCN(CC2)C(=O)C3=C(C=CC=C3)C(=O)N4CC     | 0.230007 |
| HWLGXOFSMYQGBA   | CC1=C(C=CC=C1)C(=O)N2CCN(CC2)C3=CC=C(NC(=O)CSC4=CC=     | 0.223535 |
| HWMASQCYVGFIE    | C1=CC=C(C=C1)N2C=C(C(=N2)C3=CC=C(C=C3)Br)CSC(=[NH2+])I  | 0.231062 |
| HWMGCIBPEVSOIV   | COC1=CC=C(C=C1)C2SCCN2\C(S)=N\C3=CC(Cl)=CC=C3           | 0.226449 |
| HWTBJWYIGDBEA    | CCCC[C@@H]1CNCCN1CCC2=CC(=CC=C2)C(F)(F)C(F)(F)F         | 0.229086 |
| HXPLNKYQPETFS    | COC1=CC(=CC=C1)C2=NN(C=C2CN(C)CC3=C(C)N=C4C=CC=CN3      | 0.225639 |
| HYBVVHAETRLEFE   | CN(CC(C(=O)C1=CC=CC=C1)C2=CC=CC=C2)CC3=CC(Cl)=CC(Cl)=   | 0.271842 |
| HYCVPCISSUCAZ    | C1CCN(CC1)C2=C3C=CC=CC3=NC(=C2)C4=CC=CC=C4              | 0.265106 |
| HYOYFRGAFYROPQ   | CC1=C(OCCNCC2=CC=CC=C2)C=CC(Br)=C1                      | 0.250215 |

|                |                                                        |          |
|----------------|--------------------------------------------------------|----------|
| HYQLDXYGOJREDF | O=C(CCN1CCC2=C(C1)C=CC=C2)NC3=CC=CC=C3                 | 0.236996 |
| HZIQSBATGNZGL  | CC1=CC(C)=C(C)C=C1CN2CCC(CC2)N3N=CC=C3NC(=O)C4=C(Cl)   | 0.224568 |
| IAGSPPNEMBPKMI | CN(C)CCCNC1=C(N=C(O1)C2=CC=C(Cl)C=C2)C#N               | 0.228206 |
| IANCZQXGGKBOTP | CCOC1=CN=C(O1)C2=CC=C(Cl)C=C2                          | 0.244124 |
| IBBJVLJKTNANGK | CNC(S)=N\N=C(/C)CCC\C(C)=N\N=C(S)NC                    | 0.27159  |
| IBGPJBXGKDMHHH | CC1=C(C)C(OCC(O)CN2CCC3=C(C2)C=CC=C3)=C(C)C=C1         | 0.243004 |
| IBLVRWXMJGVKAV | COC1=CC=C(NC2=NC=NC3=C2C(=CS3)C4=CC=C(OC)C=C4)C=C1     | 0.23318  |
| IBVDUESHTFZMLI | C1CN(CCO1)C2=NC(=NC3=CC=CC=C23)C4=CC=CC=N4             | 0.223002 |
| ICBICEUBDGNXDW | COC1=CC=C(C=C1)N2CCN(CCNC(=O)NC3=C(OC)C=C(C=C3)[N+](   | 0.239276 |
| ICSBTSRZHYVGZ  | CCC1C(OC2=C(C=C3OCOC3=C2)C1C4=CC(OC)=C(OC)C(OC)=C4)    | 0.244918 |
| ICJCBXYUQYODIT | CC1=C(C=C(Cl)C=C1)N2CCN(CC(=O)NC3=CC=C(CN4CCCC4)C=     | 0.264265 |
| IDDQIYZGJMLTCJ | CCOC(=O)C1=C(SC\C=N\NC2=CC=CC=C2)=C1C3=C(Cl)C=CC=C3    | 0.22699  |
| IDFLLYMCUVPBPR | CC1CCN(CC(O)COC2=CC=C(C=C2)C3=CC=CC=C3)CC1             | 0.242979 |
| IDGKROPBCDYPCE | COC1=C(OC)C=C(C=C1)C2=NC(=NO2)C3=C(OC)C=CC=C3          | 0.239311 |
| IDPCEAGLYFHFT  | COC1=CC=CC(=C1OC)C(N2CCN(CC2)C3CCCC3)C4=NN=N[N]4C(     | 0.233552 |
| IDQGIKHEHYTHX  | O=C(NC1=CC=C(C=C1)S(=O)(=O)N2CCCC2)C3=CC=C(CN4CCCC5=   | 0.226288 |
| IDTSOTQCVWNYBM | CC1CC(C)CN(CCCNC(=O)C2=CC=C3SC(N4CCCC4)C(=O)NC3=C(     | 0.252097 |
| IEAQEGSZTNJBFC | COC(=O)C1=CC=C(NC(=O)NC2=CC(Cl)=C(F)C=C2)C=C1          | 0.225954 |
| IEFLQJYSYFXCQH | CN1CCN(CC1)S(=O)(=O)C2=CC=C(NC(=O)NC3=CC(Cl)=CC=C3)C=  | 0.246298 |
| IEHAFFWCRXYSF  | [O-][N+](=O)C1=C(F)C=CC(=C1)S(=O)(=O)CCCN2CCOCC2       | 0.229185 |
| IEIJYXPXGFJHX  | CN1CCN(CC1)C2=C3C=CC=CC3=NC(=N2)C4=CC(=CC=C4)[N+](C    | 0.285615 |
| IENYSTZWERREFN | CCOC1=CC=C(OCCN(C)CC2=CC=CC=C2)C=C1                    | 0.297063 |
| IETSDSVFULQJY  | CN1CCN(CC1)C2=NC(=NC3=CC=CC=C23)C4=CC=NC=C4            | 0.272094 |
| IEZDTNCUMWPRTD | [O-][N+](=O)C1=C(C=C(C=C1)N2CCNCC2)N3CCCC3             | 0.246455 |
| IFCJHZPIQXTBIM | COC1=CC(C2=CSC(NC(=O)CC3=CC=C(F)C=C3)=N2)=C(OC)C=C1    | 0.230575 |
| IFGOXKISHLDSOC | CCC1=CC=CC=C1OCCCN2CCCC2                               | 0.239071 |
| IFHDQENIOFOWNT | COC1=CC=C(C=C1)N2CCN(CC2)C(C(C)NS(=O)(=O)C3=CC=CC=C3   | 0.22349  |
| IGFDWKFTWISJQF | COC1=CC=C(C=C1)C2=NN(C(C2)C3=C(Cl)C=CC=C3)C(S)=NC      | 0.242451 |
| IGHSNESWYQWJKG | OCCN1CCN(CC1)C2=NC=NC3=C2C(=CN3C4=CC=C(Br)C=C4)C5=     | 0.228464 |
| IGPUFUHRMWSPGW | COC1=CC(=CC(OC)=C1OC)C2=NC3=C(C=CC=C3)C(=C2)C4=NN=C(   | 0.25795  |
| IGVDXOCVFAZDBF | CCC1=C(CC)N=C2C=C(C=CC2=N1)C(=O)NCCCN3CCN(CC3)C4=C     | 0.268431 |
| IHPAPQFVGNWMBN | CCOC(=O)C1=CC=C(C=C1)N=C(S)N(CCCN2CCCCC2)CC3=CC=C(     | 0.27345  |
| IIEOHBPTLRILF  | CCCCN1C(=NC(=O)C2=CC=CO2)C(=CC3=C1N=C4C=CC=CN4C3=      | 0.283521 |
| IINVJSTLHFZNN  | CCC1CCCCN1CCCNC(=O)C2=CC3=C(C=C2)N(C)C(C)=C3C          | 0.244205 |
| IISUIBFUGHJUBG | CSC1=C(C=CC=C1)C2=NN=C(O2)C3=CC=C(Cl)C=C3              | 0.229771 |
| IYJBJQVZSYERE  | O1N=C(N=C1C2=CC=CC=C2C3=CC=CC=C3)C4=CC=CN=C4           | 0.241204 |
| IJBZONJMXCXSXW | CCN(CC)CC(O)C1=CC2=C(C=C1)C=CC3=C2C=C(O)C=C3           | 0.247328 |
| IJGSXXQMYBXCHB | CCN(CC)CCN1C(=N)N(CC(O)COC2=CC(C)=CC=C2)C3=C1C=CC=C    | 0.230852 |
| IJYHPISIGXOPFY | CC1=C(C)C2=C(N1)C=CC(=C2)C(=O)N3CCN(CC3)C4=C(C)C(C)=C( | 0.225112 |
| ILHXEMLHKPZGJK | CCN(CC)C1=C2C=C(Br)C=CC2=NC=N1                         | 0.231026 |
| ILNJPDOMRDGGOM | CCOC1=CC=C(C=C1)S(=O)(=O)NC2=C(OC)C=CC(OC)=C2          | 0.262369 |
| IMNKEUHUAVZSTA | C1C1=CC=C(CN/2\C=C/C(=N)/C=C2)C=C1                     | 0.277878 |
| IMYIETUJQGZVGC | COC1=NC(OC2=CC(=C(C=C2)[N+](O-)=O)[N+](O-)=O)=NC(OC)=  | 0.229258 |
| INATXWGGHFJGIQ | SC(=NC1CCCC1)N2CCN(CC2)C3=CC=C(Cl)C=C3                 | 0.222872 |
| INDGKFWVKZOQMH | CN1C(=O)N(C)C2=C1C=C(N3CCN(CC3)C(=O)C4=C(Br)C=CC=C4)(  | 0.236768 |
| INPNMBZFXUQZPZ | CCOC1=CC=C(C=C1)C2=NN=C(NC3=NCCCC3)O2                  | 0.224476 |
| INVMJJKFELVUKU | CC1CCN(CCOC2=CC(Br)=CC=C2)CC1                          | 0.289189 |
| IOCCMLDPNDBVDE | C\C(=N/N=C(\S)NCC1=CC=CC=C1)C2=CC3=C(C=CC=C3)C=C2      | 0.241372 |

|                 |                                                        |          |
|-----------------|--------------------------------------------------------|----------|
| IOENYQZRXBUTBA  | C(OC1=CC2=C(C=CC=C2)C=C1)C3=NC4=C(N3)C=CC=C4           | 0.245987 |
| IOWSODAHYNSLUK  | CCCOC1=CC=C(CNC(S)=NCC2=CC=C(OC(C)C)C=C2)C=C1          | 0.289754 |
| IPBGOGJVRVDOMV  | FC(F)OC1=CC=C(CN2CCC(CC2)N3N=CC=C3NC(=O)C4CCCC4)C=     | 0.232826 |
| IPCDJMHCUSAOOJ  | CCCN(CCC)CC(C)(C)NS(=O)(=O)C1=CC=C(Cl)C=C1             | 0.222592 |
| IPNYWESNDBXTQP  | SC(=NCC=C)N(CC1=CC=CC=C1)CC2=CC=CC=C2                  | 0.230858 |
| IPWIMNYYYYMAPFC | COC1=CC=C(C=C1)C2=NC(=C(C#N)C(=C2)C3=CC=CC=C3)S(C)=O   | 0.228943 |
| IQJMUBVOUOHXRP  | OP(O)(=O)CN1CCNCCN(CP(O)(O)=O)CCNCC1                   | 0.276209 |
| IQRNBJJJJYIMT   | CN(C)C1=NC(N\N=C\C2=CC(Br)=CC=C2)=NC(NCC3=CC=CC=C3):   | 0.223559 |
| IRMLBVBGBZYXZNV | C([C@H]1CNCCN1CC2(CC2)C3=CC=CC=C3)C4=C5C=CC=CC5        | 0.272189 |
| IRMNUGAFPPNLKP  | CCN(CC)C(=S)SCC(=O)NC1=NC(=C(O1)C2=CC=CC=C2)C3=CC=CC   | 0.239021 |
| IRRUJGMCBGBHEH  | CCOC(=O)C1=C(C)NC(C(=O)OCC2=C(C)ON=C2C)=C1C            | 0.244914 |
| IRVJESCRIBTULW  | CC1=CC2=C(NC(=O)C(CN(CC3=CC=CC=C3)CC4=NN=NN4CC5=CC=C   | 0.250181 |
| IRXYWNURKDCDAW  | NC(=O)C(C1=CC=C(Br)C=C1)C2=CC=C(C=C2)C(=O)C3=CC=CC=C3  | 0.244057 |
| ISDZPMGIXQBLRG  | CC1=C(OC2=C1C=C(C)C=C2Cl)C(=O)N3CCN(CC3)C4=CC=NC=C4    | 0.230948 |
| ISTFTATZQQNYEU  | COC1=C(C=CC=C1)\N=N\C2=NC(=C(N2)C3=CC=CC=C3)C4=CC=C    | 0.225884 |
| ISWBJEGHXZRLFP  | CC1=CC(=NN1CC2=CC=C(C)C=C2)C(=O)NC3=CC=C(Br)C=C3       | 0.223222 |
| ITAHKLCZQWHDIN  | COC1=C(NC(=O)C2=CC=C(CN3CCN(CC3)C4=CC=CC=C4)C=C2)C=    | 0.223709 |
| ITEMLMXMYOMKQF  | CC1=NN(C(C)=C1\C=N\N2CCN(CC2)C3=CC=CC=C3)C4=CC=CC=C    | 0.243253 |
| ITEQRTWMTYJAE   | FC(F)(F)C1=C(C=NC(=N1)N2CCCC2)C3=NN=NN3C4=CC=C(Cl)C=   | 0.225736 |
| ITMSURDFRPXGBI  | COC1=CC=C(C=C1)N2CCN(CC(=O)NC3=C(SC)C=CC=C3)CC2        | 0.231605 |
| ITOIFNLKDKMKOA  | CCOC(=O)C1=C(OC2=C1C(CN(C)C)=C(O)C(CN(C)C)=C2)C3=CC=C  | 0.228546 |
| ITWKHNKRPIXIABE | CC1=CC=C(C=C1)N2C=C(CNCCC3=CSC=N3)C(=N2)C4=CC=C(F)C    | 0.287142 |
| IUFSXUHCYBGFAM  | CCOC1=CC=C(C=C1)S(=O)(=O)N2CCN(CC(O)COC3=CC(=CC=C3))   | 0.248236 |
| IUQGXMQYGXRRDW  | COC(=O)C1=CN(C=C(C1C2=CC(=CC=C2)[N+][O-])=O)C(=O)OC)C3 | 0.229494 |
| IVAWCVDHOTUAQF  | CSCCC(NC(=O)C1=CC=CC=C1)C(=O)N2CCN(CC3=CC=C(Cl)C=C3)   | 0.231273 |
| IVPPXEYDMTEQN   | COC1=C(OC)C=C(C=C1)C2=CN=C2C3=C(O)C=C(OCC(C)=C)C=C3    | 0.233355 |
| IVYFMXZYAAQEV   | CCOC1=CC=C(NC(=O)CN2CCN(CC(=O)NC3=CC(=C(Cl)C=C3)C(F)(  | 0.22742  |
| IWDGWQZJFLVDSG  | COC(=O)C1=CN(CC2=CC=C(C)C=C2)C=C(C1C3=CC(F)=C(F)C=C3)  | 0.2247   |
| IWNVURXZAIYEGZ  | Cl.CCCC(N1CCN(CC1)C2=CC(Cl)=CC=C2)C3=NN=NN3CC4=CC=C    | 0.234048 |
| IXHRPSIJGXCI OH | COC1=C(C=CC=C1)C2=C3N=C(C)C=C(N3N=C2)N4CCCCC4          | 0.249195 |
| IXRFXROGXPJAGZ  | [O-][N+](=O)C1=C(Br)C=C(N2CCCC2)C(F)=C1                | 0.278176 |
| IYINIJNBCAQUCX  | CCCN(CC1=CC=CC=C1)C2CCN(CCC3=CC=CC=C3)CC2              | 0.328276 |
| IYLYIQZUZPGQNN  | CC1=CC=C(CN2CCN(CC2)\N=C\C3=CC=CC=C3)C=C1              | 0.230406 |
| IYRBMNSXGNPBSQ  | ClC1=CC(=CC=C1)C2CC(=O)NC3=C2C=C4CCCC4=C3              | 0.229454 |
| IYWGNQQLTCZOTC  | CC1=NN(C(C)=C1\C=N\NC(=O)CSC2=NN=C(N2C3=CC=C(Cl)C=C3   | 0.242196 |
| IZFAYTPVDGJXAT  | C(CC(CC1=CC=CC=C1)C2=CC=CO2)NCC3=CC=CC=C3              | 0.23848  |
| JAOSEIAJTQKXPZ  | CC1=CC=C(C=C1)S(=O)(=O)NCCC(C2=CC=CO2)C3=CC=CC=C3      | 0.232106 |
| JATLPCOUVWPKNJ  | FC1=C(CNC(C2=CC=CC=C2)C3=CC=CC=C3)C(Cl)=CC=C1          | 0.262315 |
| JAXHRWLWPCLFRN  | CN1CCN(CC1)C2=C(NS(=O)(=O)C3=C(Cl)C=CC=C3)C=C(Cl)C=C2  | 0.261911 |
| JBBSWMJFTCEOLT  | CN(C)CCCN1C(=O)C2=C(C=CC=C2)N=C1SCC(=O)NC3=NC(=CS3)    | 0.225498 |
| JBCQAORKQPODRW  | CC(=O)C1=C(C)NC(C(=O)OCC2=C(F)C=CC=C2)=C1C             | 0.232526 |
| JBLNZNDTQWAJDN  | COCCCNCCOCCOC1=C(Br)C=C(Cl)C=C1                        | 0.243436 |
| JBPDVHTSPXTOM   | O=C(C1CCCN(CC2CC2)C1)C3=C4C=CC=C5CCC(C=C3)=C45         | 0.229581 |
| JBSAJONOVKCGOQ  | C1CCCN(CC1)C2=NC(=CS2)C3=CC=CC=C3                      | 0.254869 |
| JBXVXHBWBMJGIP  | N#CC1=C(N=C(C=N1)C2=CC3=C(OCCOCCOCCOCCOCCO3)C=C2       | 0.226725 |
| JCDSUXLNHJBRFG  | CCOC1=CC=C(C=C1)C2=NN=C(SCC3=NN=C(O3)C4=CC=CC=C4)N     | 0.228542 |
| JCLWLOGOGKBEGR  | CC1=CC=C(C=C1)C2=NOC(CCC(=O)NCCCN3CCN(CC3)C4=CC(Cl)    | 0.255822 |
| JCMQQNRPYKUQNS  | CCOC(=O)C1=CC=C(NC(=O)CCC2=NC(=NO2)C3=CC=CC=C3Cl)C=    | 0.222626 |

|                 |                                                        |          |
|-----------------|--------------------------------------------------------|----------|
| JCSBDYJALPKIB   | CCN(CC)S(=O)(=O)C1=CC=C(C=C1)C2=NOC3(C2)N(C)C4=C(C=CC  | 0.23393  |
| JCTUXAQXOAUKHI  | CC1=C(C)C2=C(C=C1)C(=CC(=N2)C3=CN=CC=C3)C(=O)N4CCN(C   | 0.223557 |
| JDQNUEOWXXAZHW  | COC1=CC(OC)=C(C=C1)C(=O)NC2=CC3=C(C=C2)N=C(C=C3C)N4C   | 0.224456 |
| JDWJAJQDBOFSCS  | CC1=C(C=CC=C1)\N=C(/S)NCCSC2=CC=C(Cl)C=C2              | 0.229814 |
| JEDYDGPKXXCAMR  | COC1=CC=C(CN2N=NN=C2C(N3CCN(CC3)C4CCCC4)C5=CC=CC       | 0.267008 |
| JEEPBTWHGGAFCL  | COC1=C(OC)C(OC)=C(CNCCC2=CC=C(Cl)C=C2)C=C1             | 0.28257  |
| JEFKGGPWVUONSR  | COC1=CC=C(C=C1)C2=CSC(CCN3N=C(C)C=C3C)=N2              | 0.23095  |
| JEJWQCTZDAJWOX  | CC1=CC=C(C=C1)S(=O)(=O)NCCC2=CC=C(C=C2)C(=O)NCCN(CC3=  | 0.225909 |
| JEOAQTNLXBCMAF  | OC1=C(C=CC=C1)N2CCN(CC2)C3=C(Cl)C=C(C=C3)[N+][[O-]]=O  | 0.223471 |
| JEWNHEWDQGXKSB  | C(CCN1CCCC1)COC2=CC(OC3=CC=CC=C3)=CC=C2                | 0.264553 |
| JEWOVFPNPJKWHN  | OC(CNC1CCCC1)CNC2=C3C=CC(Cl)=CC3=NC=C2                 | 0.23801  |
| JEXHFRROVBBQCA  | CN(C)CCCN(C(=O)C1=CC2=C(C=CC=C2)C=C1)C3=NC4=C(S3)C=C   | 0.230169 |
| JEXNGXDZDIALR   | CCOC1=C(OCC2=C(Cl)C=C(Cl)C=C2)C(CNCCO)=CC=C1           | 0.226174 |
| JFECUBGECCGCS   | CN1C=C(CN2CCCC(C2)C(=O)C3=C(F)C=CC(F)=C3)C4=C1C=CC=C   | 0.263816 |
| JFIGKXRBNOWCTJ  | NC(N)=NN=C(N=NC1=CC=CC=C1)C2=CC=C(Cl)C=C2              | 0.302471 |
| JFOVJQCUIHRYOI  | CN(CC1COC2=C(O1)C=CC=C2)C3=C4C=CC=CC4=NC(=N3)C5=C      | 0.237136 |
| JFXJZFHPBYCODG  | CC1CCN(CC1)C(=S)C2=CC=C(C=C2)N(C)C                     | 0.229105 |
| JGXMWNIVIDLSHR  | COC1=C(C2=C(N=C(C)C=C2)C(=C1)[N+][[O-]]=O)[N+][[O-]]=O | 0.242647 |
| JGYJCRUVWAQTJL  | CCCCOC1=CC=C(C=C1)C(=O)C(CN2CCOCC2)C3=CC=CC=C3         | 0.226408 |
| JGZOWIZUUCOWBI  | COC1=C(OCCCC2=C(Br)C=C(C)C=C2C)C=CC=C1                 | 0.237929 |
| JHGXRJAFYGXXHM  | CC(C)OC(=O)NC1=CC2=C(CCC3=C(C=CC=C3)N2C(=O)N4CCN(C)    | 0.236299 |
| JINAMQIRPMDXCD  | CN1CCN(CC1)C(=S)C2=CN(CC3=CC(F)=CC=C3)C4=C2C=CC=C4     | 0.239978 |
| JIWLATPWTJVSEH  | OC(COC1=CC=CC=C1)CN(C2=CC=CC=C2)S(=O)(=O)C3=CC=CC=C    | 0.224047 |
| JJRKCJKZOGFYPI  | CC1=C(CC=C)C(N\N=C\C2=CC=NC=C2)=NC(=N1)C3=CC=CC=C3     | 0.226694 |
| JJTYWBMDBLXULI  | ClC1=CC2=C(C=C1)C(N\N=C\C3=CC(Br)=CC=C3)=CC=N2         | 0.239082 |
| JKBNVHANVPUPKE  | CCN1C=CN=C1CN(C)CC2=CN(N=C2C3=CC(C)=CC=C3)C4=CC=C(     | 0.223254 |
| JKHAICNBAJGKSQ  | CN(C)CCCN(C(=O)C1=CC2=C(S1)C3=C(S2)C=CC=C3             | 0.242284 |
| JLOBHBFPMZARDU  | CC1=NN=C(C2=CN(N=C12)C3=CC=CC=C3)C4=CC(Br)=CC=C4       | 0.235778 |
| JLSLZBCBNKGSPP  | COC1=C(OC)C=C(C=C1)N=C(S)N2CCN(C\C=C\C3=CC=CC=C3)CC    | 0.226982 |
| JLTONPRENNPEAR  | COC1=CC=C(NC2=NC(=NC(=N Asinex Ltd.,BAS 07354379       | 0.246747 |
| JLTXVLMENAZLNM  | CCN1CCN(CC2=CC=C(OCC3=CC=CC=C3)C=C2)CC1                | 0.261234 |
| JNIDCDDMCZGKCX  | COC1=CC=C(C=C1)C2(O)CCN(CCCCOC3=CC=CC=C3)CC2           | 0.228036 |
| JOGWHDSFGXCBJM  | CN1CCN(CC1)C2=NC3=C(C=C(C=C3)N=C(S)N4CCCCC4)C(C)=C     | 0.238026 |
| JOIDIVUDKPRITIS | [O-][N+](=O)C1=CN=C(C=C1)N2CCN(CC3=CC=CC=C3)CC2        | 0.226207 |
| JOJSQJRJKUTDEU  | CCN1CCN(CC1)C(=O)C2=C(C=CC=C2)N(CC3=CC=CC=C3)S(=O)(=   | 0.272356 |
| JOWHAUBDIRDYTL  | CCCN(CCC)CCCN(C(S)=NC1=CC2=C(C=C1)N=C(C=C2C)N3CCN(C    | 0.233333 |
| JPBNGWPHLUZKBL  | CCOC1=C(OCCN2CCC(CC3=CC=CC=C3)CC2)C=CC=C1              | 0.301886 |
| JPHOMPNOKNRQQR  | FC(F)(F)C1=NN=C(NC2=CC=C(Cl)C=C2)S1                    | 0.2367   |
| JPJOVOODFZGOBN  | OC(COC1=CC=CC=C1)CN2CCN(CC2)C3=CC=C(C=C3)[N+][[O-]]=C  | 0.234928 |
| JPPIQETUUBNFCC  | CCOC1=CC=C(C=C1OCC)C2=NC(=NO2)C3=CC=CC=C3              | 0.230526 |
| JPURAYRMIBQZRY  | CC(C)N(CCOC(C1=CC=CC=C1)C2=C(C)C=CC=C2)C(C)C           | 0.269919 |
| JQAJLVIVGYEBAG  | OCCN1CCN(CC1)C2C(NS(=O)(=O)C3=CC=CC=C3)C4=C5C2=CC=C    | 0.240437 |
| JQCRYKFJQAXIGC  | CC1CCCC(C1)N2CCN(CC2)C3=C(C)C=CC(C)=C3                 | 0.247982 |
| JQPRWNFWMSGCNX  | C(NC1CCCC1)C2=C(OCC3=CC=CC=C3)C=CC=C2                  | 0.269498 |
| JQUOFAHAMJITJLC | CC(C)N(CC1=NC(=NO1)C2=CC=C(C)C=C2)C(=O)C(C3=CC=CC=C3   | 0.229363 |
| JQWSTJBTMKYCEO  | COC1=CC(NC2=C3C=C(C)C=CC3=NC(C)=C2)=C(OC)C=C1          | 0.303287 |
| JRALGXVGNCFV    | CCOC1=CC=C(CNC(=O)NC2=CC=CC=C2)C=C1                    | 0.232954 |
| JRYZLOINKNIRJT  | CCOC(=O)C1=C(C)[N](CCN2CCN(C)CC2)C3=CC=C(OC)C=C13      | 0.227162 |

|                 |                                                      |          |
|-----------------|------------------------------------------------------|----------|
| JSGLPQUQCAJGX   | CC1=C(CN2CCCC2C3=NC=CS3)N=C(O1)C4=C(F)C=C(F)C=C4     | 0.228689 |
| JSJBMZPEAGTQLQ  | COC1=C(NC(=O)NCC2CCN(CC3=C(C)C=CC(C)=C3)CC2)C=C(C)C= | 0.231271 |
| JSNNVLCYCHVEHC  | CCCCOC1=CC=CC(=C1)C(=O)NC2=CC=C(C=C2)N3CCN(CC)CC3    | 0.225637 |
| JTFWJZSDIREVFS  | CSC1=C(OC2CCN(CC3=CC=CC=C3)CC2)C=CC=C1               | 0.340908 |
| JTMQGPLGCCHGPD  | ClC1=CC=C(NC(=O)NC2=CC(=C(C=C2)N3CCCC3)S(=O)(=O)NC4= | 0.236982 |
| JTMZNFHJPKPQDT  | CC1=CC(CN2C(=CC3=C2N=CC=C3)C(C)(C)C)=CC=C1           | 0.271131 |
| JUEAKQUMMBNRJE  | CC1=C2C=CC=CC2=NC(NCC3=CC=CC=C3)=C1                  | 0.231729 |
| JUNITZPKTVZOBL  | CN(CCCOC(C)=O)CC\C=C1\C2=C(CSC3=C1C=CC=C3)C=CC=C2    | 0.288524 |
| JUUBFXIMFOJFOF  | CCC1=C(C(N)=NC(N)=N1)C2=CC(=C(CI)C=C2)[N+](O)=O      | 0.250458 |
| JVLGQDDHLXXDIU  | CC(C)(C)C1=CC=C(CN(CC2=CC=CO2)CC3=NN=NN3C4CCCC4)C=   | 0.22253  |
| JVMNOSIVRDMOOI  | CCOC1=CC(NC(=O)CN2CCC(CC2)NC(=O)C3=CC(F)=CC=C3)=C(O  | 0.251416 |
| JWIQRHJOQFUKQG  | [O-][N+](=O)C1=CC=C(C=C1)N=C(S)NCC2=CC=NC=C2         | 0.247205 |
| JWLVUMDTLQKCBN  | CCC(C)NC(=O)NC1=C(CI)C=C(Br)C=C1                     | 0.240564 |
| JWUZFQWYBYNHLW  | CCCCOC1=C(C=NN2C(C)=NN=C2N3N=C(C)C=C3C)C4=C(C=CC=C4  | 0.22541  |
| JXKGRWTUSHVHIN  | CC1=C(C)C=C(C=C1)N=C2N=C(N)C3=C2C=CC=C3              | 0.239148 |
| JXLWBGZKWDKAY   | O=S(=O)(N1CCC(CC1)OC2=CC=C(C=C2)N3C=NN=N3)C4=CC=CC   | 0.242508 |
| JXNJCTVONYQNOB  | CC1=CC(=CC(C)=C1)N=C(S)NC2CC3CCC(C2)N3CC4=CC=CO4     | 0.237643 |
| JXPRESUBWIPPEI  | CN(C)CCN[C@H]1CCC2C3CC=C4C[C@H](O)CC[C@]4(C)C3C      | 0.223278 |
| JYGQRLQMJKRAQM  | C(SC1=NN=C(O1)C2=CC=NC=C2)C3=CC=CC=C3                | 0.236171 |
| JYPNBRZXZWBVCJ  | COC1=C(OC)C=C(\C=N\NC(=O)CCN2C=NC(=C2C3=CC=CC=C3)C   | 0.225151 |
| JZJDBAQXXFLGET  | CCC1=C(OCCCCN2CCCC2)C=CC=C1                          | 0.262105 |
| JZXKGDVUHZCZAG  | CCOC(=O)C1=C(N=C(N2CCN(CC2)C3=NC=CC=C3)C(=C1)C#N)C4  | 0.233248 |
| JZMQVIHLDJAZFB  | ClC1=CC(CI)=C(CSCCNC(=O)C2=CC=C(CN3CCOCC3)C=C2)C=C1  | 0.223441 |
| KAPNTNCOCCNYHW  | C\C(=N/N=C(\S)NCC1=CC=CC=C1)C2=CC=C(CI)C=C2          | 0.228087 |
| KATBYCBPLVGOSL  | O=C(CN1CCN(CC1)C2CCCC2)NC3=C(C=CC=C3)N4CCCC4         | 0.233509 |
| KBGPTRHFZMERIT  | CN(C)CC(O)C1=CC=C(\C=C\C2=CC=C(CI)C=C2)C=C1          | 0.27744  |
| KBJNMSFZNNKLAR  | CN1CCN(CC1)C2=NC(=NC(=N2)N3CCOCC3)NC4=CC=CC(=C4)C(   | 0.227634 |
| KBSCTGNEANFMTI  | CC1=C(C[N]2C=CC=C2\C3=N\C(CO3)C4=CC=CC=C4)N=C(O1)C5  | 0.229886 |
| KCANVEYUHCAMAP  | CN(C)P(=O)(N(C)C)C(CI)=C(N1CCCCC1)N2CCCCC2           | 0.222743 |
| KCGKYNZVRUJZQT  | COC1=CC(OC)=C(C=C1)C(=O)C2CCN(CC3=CC=C(C)S3)C2       | 0.281642 |
| KCQPDQZKZHYEG   | CNC(S)=N\N=C\C1=CC(OCC2=C(F)C=CC=C2)=CC=C1           | 0.240951 |
| KCXHNZGGTPMYAO  | O\N=C\C1=CN(N=N1)C2=CC=C(CI)C=C2                     | 0.26659  |
| KDBMTBGGSOYBFT  | FC1=CC=C(OCC2=NC(=C(O2)N3CCN(CC3)CC4=CC=CC=C4)C#N)(  | 0.224811 |
| KDFDQZTQJHHPU   | CC1=CC(C(=O)ON=C(N)C2=CC=C(Br)C=C2)=C(C)C=C1         | 0.260282 |
| KDMMSLIGTXPHPC  | C(CC1=NC=CC=C1)NC2=CC3=C(C=C2)C4=C(C3)C=CC=C4        | 0.233774 |
| KDOOEZRRXACFFT  | CC1=NN(CC(O)COC2=CC3=C(CCC3)C=C2)C(C)=C1Br           | 0.23467  |
| KDXXZHBZHFASCN  | CCN1C=C(CN2CCC(CC2)C(=O)NC3=CC=C(OC4=C(F)C=CC=C4)C=  | 0.22428  |
| KDZAFEAXRMURGE  | CC1=CC(C)=NC(=N1)N(CCOC2=CC=CC=C2)C#N                | 0.265341 |
| KEDKUNDQJRZHCY  | COC1=CC(OC)=C(Br)C=C1CN2CCN(C)CC2                    | 0.261326 |
| KEMGTVYZPCBGOZ  | BrC1=CC=C(NC(=O)C2=CC(OC(=S)N3CCOCC3)=CC=C2)C=C1     | 0.244464 |
| KEPUOYACJXZYTQ  | CCN1CCN(CC1)C2=CC=C(N)C=C2                           | 0.253997 |
| KETQGNPDHAUPMQ  | COC1=CC=C(\C=C\CN2CCCC(CO)(CC3=CC(CI)=CC=C3)C2)C=C1  | 0.224285 |
| KFAYLGCSTUTEDG  | ClC1=CC=CC=C1OCCCCN2CCCC2                            | 0.223001 |
| KFLNUTIUYWTQNV  | OC1=C(C=CC=C1)C(=O)NC2=CC3=C(C=CC=C3)C=C2            | 0.222884 |
| KFMJDJOTJHGYPD  | COC1=CC=C(C=C1)S(=O)(=O)NC2=C(OC)C=CC(=C2)[N+](O)=O  | 0.232696 |
| KFQVNFHNLPHYDBU | CC1=C[N+](CC(=O)C2=CC=C(C=C2)C3=CC=CC=C3)=CC(C)=C1   | 0.234019 |
| KGCBYKIMDOLQAS  | N=C1N(CCCN2CCOCC2)C=NC3=C1C(=C(O3)C4=CC=CC=C4)C5=    | 0.274316 |
| KGHCKYAADOQTDL  | COC1=CC=CC2=C1N=C(S2)N(CCCN(C)C)C(=O)C(C3=CC=CC=C3)( | 0.22428  |

|                 |                                                         |          |
|-----------------|---------------------------------------------------------|----------|
| KGXPAEXNOWUTLY  | [O-][N+](=O)C1=CC(C(=O)C2=CC=C(Br)C=C2)=C(C=C1)N3CCCCC: | 0.223041 |
| KHBXLWYPAHPKPS  | CCOC1=C(OCCOCCN2CCN(CC3=CC=CC=C3)CC2)C=CC=C1            | 0.232553 |
| KHKINSFQHMMKAG  | COC1=CC(NS(=O)(=O)C2=CC=C(SC)C=C2)=C(OC)C=C1            | 0.259358 |
| KHQBLGXKDHEXLY  | FC1=CC=C(CN2CCC(CC2)C(=O)N3CCN(C\C=C\C4=CC=CC=C4)CC     | 0.224606 |
| KHWOFOKQCKHWOQ  | CCC1=CC=C(C=C1)C2=NN=C(NC3=CC(=CC=C3)S(=O)(=O)N(C)C)S   | 0.223699 |
| KHZZMTAJRIDFIB  | CCN(CC)C1=CC=C2C3=C(OC)C(OC)=C(OC)C=C3CC[C@H](NC)C2     | 0.223766 |
| KIGGDAAHNWHMSMB | C(N1CCN(CC1)C(C2=CC=CC=C2)C3=CC=CC=C3)C4=NN=NN4C5       | 0.294418 |
| KIUBOTVFTXCRLM  | CC1=C(CSCC2=NC3=C(N2)C=CC=C3)C=CC=C1                    | 0.229887 |
| KIUJEASPRLEBRK  | COC1=CC=C(CC2(CO)CCN(CC2)C(C)COC3=CC=CC=C3)C=C1         | 0.238843 |
| KIYVHIIADWNBLP  | COC1=C(OC2=CC(Cl)=CC=C2)N=C(N=C1)C3=NC=CC=C3            | 0.225048 |
| KJCOJSQXSSWBOW  | C1CC(CCN1)C2=CC(=NN2)C3=C4C=CC=CC4=CC=C3                | 0.295404 |
| KJJNTQIFGZQDBH  | CC1=C(CS(=O)CC(=O)NCCC2CCN(CC3=CC=CC=C3)CC2)N=C(O1      | 0.25136  |
| KJXSVDPEQQZMBQ  | COC1=CC=C(OC2=C3C=CC=CC3=NC(SC)=N2)C=C1                 | 0.226344 |
| KKEGVNCPHQPGEI  | CN1C2=C(OC3=C1C=C(N=N3)N4CCN(CC5=CC=CC=C5)CC4)C=C1      | 0.226999 |
| KKJZHOSFNMOHED  | O=C(N1CCN(CC1)C2=CC=CC=C2)C3=CC(=CC=C3)S(=O)(=O)N4C(C   | 0.242551 |
| KKUPAQXIWRJBGX  | CC\C(=N/NC1=C2C=CC=CC2=CN=N1)C3=CC=C(F)C=C3             | 0.245846 |
| KLCDQSGLLRINH   | NC1=C(\N=N\C2=CC=CC=C2)C3=C(C=CC=C3)C=C1                | 0.225048 |
| KLDJVUCROBXZPY  | COC1=C(C)C=C(CN2CCC(CC3=CC=CC=C3)CC2)C(C)=C1            | 0.264482 |
| KLNDWVFAKPPOLR  | CC(NC(=O)C1=CC(=CC=C1)S(=O)(=O)N2CCN(C)CC2)C3=C(Cl)C=C  | 0.226613 |
| KLTOIPJAYFPKPX  | ClC1=CC=C(OCCSCC2=NN=C(NC(=O)NC3=CC(Cl)=CC=C3)S2)C=C    | 0.223317 |
| KLYSZBKELNHMBM  | COC1=CC(=CC(OC)=C1OC)C(=O)N\N=C\C2=CC=C(C=C2)N(CCCl)    | 0.249804 |
| KMEORUDTMIYUQO  | CN1CCN(CC1)C(=S)C2=CC=C(OCC(=O)NC3=CC(=CC=C3)C(F)(F)F)  | 0.222909 |
| KMJAIOIQANQPJDX | COC1=CC=C(CC2(CO)CCN(CC3=CC=C(OC(F)(F)F)C=C3)CC2)C=C1   | 0.263187 |
| KNHQDHACCVXHFJ  | COC1=CC=C(C=C1OC)C2=NN=C(O2)C3=CC=CN=C3                 | 0.228933 |
| KOEKRBDZZOVZ    | COC1=CC=C(OCC(O)CN2C(=N)N(CC3=CC=CC=C3)C4=CC=CC=C2      | 0.225321 |
| KOFWLPMUYUZFP   | CN(CCOC1=CC=C(Cl)C=C1)CC(O)C2=CC=CC=C2                  | 0.274452 |
| KOGKLWVBRDGOX   | C1CN(CCN1C2=CC=CC=C2)C3=NC(=NC(=N3)C4=CC=CC=C4)N5C      | 0.244484 |
| KORDZYYEBBVDAZ  | COC1=CC=C(NC2=NC=NC3=C2C=N[N]3CC4=CC=CC=C4)C=C1O        | 0.248243 |
| KOUOYJYRICGOSC  | N1C=CC2=C1C=CC(=C2)C3=CN=CC=C3                          | 0.225907 |
| KOVIKBQUWRXSED  | COC1=CC(=CC=C1)C2=C(C3=C(S2)C=CC=C3)C4=CC=C(OCCN5C      | 0.230043 |
| KPFNCQBDQIVSJG  | CCOC1=C(OC)C(Br)=CC(=C1)C(=O)NC2=CC=C(F)C=C2            | 0.25203  |
| KPMYNDOTFPMRGX  | CSC1=CC=C(CN(C)C(=O)C2=CC(=CC=C2)S(=O)(=O)N3CCN(CC4=C   | 0.225111 |
| KPXBSOCMUBSBS   | COC1=CC=C(CN2CCN(CC2)S(=O)(=O)C3=CC=C(Br)C=C3)C=C1      | 0.294165 |
| KQERGFNGNIWLDR  | CC[N]1C2=CC=CC=C2N=C1C3=CC=C(C=C3)N(C)C                 | 0.271357 |
| KQIHSDIGUBVIJR  | COC1=CC=C(SC2=C(OC)C=NC(=N2)C3=NC=CC=C3)C=C1            | 0.232626 |
| KQIYRTRYFJCLHP  | COC1=CC2=C(OC(C)=C2C(=O)N3CCN(CC3)C4=CC=CC=C4)C=C1I     | 0.23112  |
| KRFARVYVEIJXSQ  | CC1=CC(=CC(C)=C1)N=C(S)NCC2=CC=C(F)C=C2                 | 0.239387 |
| KTBYFABLDEWPS   | [O-][N+](=O)C1=C(N=CC=C1)N2CCC(CC2)C3=CC(=NN3)C4=CC=C   | 0.230744 |
| KTHPCIRABJFDML  | C1CN(CCN1)C2=NC(NC3=CC=CC=C3)=NC(NC4=CC=CC=C4)=N2       | 0.283197 |
| KTWSKIQUAVAPQO  | OC1=C(CNCCCNC2=C(O)C=CC=C2)C=CC=C1                      | 0.23918  |
| KUGLEHGRXKMLME  | CCCCNC1=NC(=NC(=N1)N(C)C2=CC=CC=C2)N3C=CN=C3            | 0.228386 |
| KUKMFSKXMCRUCL  | COC1=C(OC)C=C(C=C1)C2=NN=C(COC3=CC4=C(C=CC=C4)C=C3      | 0.277756 |
| KUSKQSLFNPHSJH  | CC1=CC(Br)=C(OCCCCN2CCCCC2)C=C1                         | 0.287186 |
| KVFRNVSKTWFZLZ  | FC(F)OC1=CC=C(C=C1)N=C(S)N2CCN(CC3=CC=CC=C3)CC2         | 0.226878 |
| KVHRLKBZRBQJDR  | FC1=C(\C=N\NC(S)=NC2=C(Cl)C=C(Cl)C=C2)C=CC=C1           | 0.232812 |
| KWWTUELROYQXKO  | CC1=C(C)C(NC(=O)C2=NN(C(=N2)C3=CC=CC=C3)C4=CC=CC=C4     | 0.23416  |
| KWYQGFAGMNSBQW  | ClC1=CC(=CC=C1)N2CCN(CCCN3CCN(CC3)C4=CC=CC=C4)CC2       | 0.360586 |
| KXEZBQTZEBDTNH  | CC1=C(C#N)C(Cl)=NC(N)=C1C#N                             | 0.223116 |

|                 |                                                        |          |
|-----------------|--------------------------------------------------------|----------|
| KXFYGCOGCADHLM  | COC1=C(C=CC=C1)C2CCN(CC3=CC(Cl)=C(Cl)C=C3)CC2          | 0.277491 |
| KXPJBGWZIZEBLM  | CCC1=CC=C(C=C1)C2=NC(CN3CCC(CC3)C(=O)NCCC4=CC(OC)=C    | 0.222641 |
| KXTYPELBHVVWFC  | ClC1=C(CN2CCN(CC2)\N=C\3=CC=NC=C3)C=CC=C1              | 0.256583 |
| KYAKSESTNXAPNO  | CC(CCCN(C)C)C(CC1=CC=CC=C1)C2=CC=CC=C2                 | 0.32244  |
| KYXSKURMRIMYFM  | CC1=C(CSCC(=O)NC2=C(C=CC(Cl)=C2)N3CCCC3)C(C)=NO1       | 0.253731 |
| KYZWFXSCKYQHNC  | CN1CCN(CC1)C2=C3C=CC=CC3=NC(=N2)C4=CC=CS4              | 0.235735 |
| KZNNKGUYBGZWFY  | COC1=CC=C(C=C1)N2CCN(CC2)C3=C4C=CC(Cl)=CC4=NC=C3       | 0.224033 |
| KZWNTXVNZWECJU  | O=C(OCCN1CCCC1)C2(CCCC2 Vitas-M Laboratory,STK555169   | 0.230883 |
| KZXCSEFVNVIGEKX | CCN(CC1=CC=CC=C1)C(C2=CC=CC(=C2)C#N)C3=NN=N[N]3C(C)(   | 0.240999 |
| LAENUZQHPWDHFN  | COC1=CC=C(C=C1OC)C(=O)N2CCN(CC2)C3CCC(CC3)C4=CC=CC     | 0.22541  |
| LAGZXGNBDUFGPI  | COC1=C(OC)C=C(NC(=O)C(=O)NCC(N2CCC3=C(C2)C=CC=C3)C4=   | 0.226278 |
| LAJIJUOIBRLOMO  | OCCC1CN(CC2=CN=C(S2)C3=CC=CC=C3)CCN1CC4=CC=CC=C4       | 0.251236 |
| LAPZPUGWSBIQQC  | CN(CCC1=NC=CC=C1)C2CCCN(C2)S(=O)(=O)C3=C(C)C=C(Cl)C(C) | 0.224566 |
| LBAFURBQIAJSLW  | COC1=C(SC2=CC(Cl)=CC=C2)N=C(N=C1)N(C)C                 | 0.227098 |
| LBEQPUMCFYHPIM  | CC1=CC=C(C=C1)S(=O)(=O)N2CCC3=C(CC2)C=CC=C3            | 0.28032  |
| LBSIRYRCMMQUAB  | COC1=CC=C(C=C1)C(O)C(CN2CCCC2)C3=CC=CC=C3)C4CCCC       | 0.240791 |
| LBVFWJILNBYIOO  | COC1=CC2=C(C=C1)C=C(C=C2)C3=NNC=C3CN4CCCC4C5=NON       | 0.233937 |
| LCKMLQCVCBPQQI  | CCCCNCCCOC1=C(Cl)C(Cl)=CC=C1                           | 0.268276 |
| LCKUBQBEDRQTRC  | ClC1=CC2=C(NC3=C2CNCC3)C=C1                            | 0.242494 |
| LCLHNZWVBURZBA  | [O-][S+](=O)(CC(CN1CCCC1)N2CCCC2)C3=CC=C4C=CC=CC4=C3   | 0.227339 |
| LCRABWZMGNEZJV  | CC1=C2C=CC=CC2=NC(=C1)N3CCNCC3                         | 0.249301 |
| LCVIGDYZEMTQLA  | COC1=CC=CC=C1N2CCN(CC2)C(=O)C3=C(C)ON=C3C4=CC=CC(=     | 0.244093 |
| LCWXCNKXPUOIIU  | CC1=CC=CC2=C1N3N=NN=C3C(CN(CC4=NN=NN4C5CCCC5)C         | 0.240954 |
| LCYPBPWKIODAKD  | CCN(CC)C1=CC=C(C=C1)\C=N\NC2=NC=C(C=C2)[N+][[O-]]=O    | 0.228141 |
| LDBGXYHYHGCKLH  | CCCC(N1CCN(CC1)C2=CC=CC(=C2)C)C3=NN=N[N]3CC4CCCC       | 0.230956 |
| LDNFVOBONUXXME  | CN1C(=N)N(CC(O)C2=CC=CC3=CC=CC=C23)C4=CC=CC=C14        | 0.231279 |
| LDSNGCZYDAXOBG  | CCOC1=CC=C(C=C1)\C2=C\3C(N2CC=C)C(=O)C#N)C3=NN=C4CC    | 0.224932 |
| LDZQSFJRJWGBZEP | CCOC1=C(C(=O)N2CCN(CC2)C3=CC=CC=C3)C4=C(C=CC=C4)C=C    | 0.231223 |
| LEGVQFQAMCUMQW  | COC1=CC(=CC(OC)=C1OC)C(=O)C2=CC(OC)=C(OC)C=C2          | 0.252156 |
| LEJHIUNKJREDRV  | CC1=C(C=CC(Cl)=C1)C(=O)C2CCCN(C2)C3CCSCC3              | 0.254048 |
| LEQWXTTZROBKHE  | CC1=CC(=NC(OC2=CC=CC(C)=C2C)=C1S(C)(=O)=O)C3=CC=CC=C:  | 0.229139 |
| LERFXNHGOBLKHJ  | CCOC(=O)C1=C(N=C(N2CCCC2)C(=C1)C#N)C3=CC=CC=C3         | 0.229874 |
| LFCRESUTNYKKS   | CC1=CC=C(C)C(=C1)N2N=NN= Enamine,T5334664              | 0.228731 |
| LFGYSWPEUKSZOQ  | COC1=CC=C(OC)C(CN2CCCC Vitas-M Laboratory,STK138773    | 0.248713 |
| LFXFFBJIBSLMNJ  | CC(C(=O)C1=CC=C(C=C1)C2=CC=CC=C2)[N+]=3=CC=C(C)C=C3    | 0.233274 |
| LGBBDZXRVTQNU   | CN(C)CCCOC1=CC(Cl)=CC=C1                               | 0.271559 |
| LGDWSMMLDYQYJBZ | CC(=O)OC1=CC(SCCCCCN2CCOCC2)=C(OC(C)=O)C=C1            | 0.223794 |
| LGEINYZXOUVJFZ  | CC(C)C)C1=CC=C(OCCCCCN2CCNCC2)C=C1                     | 0.262373 |
| LGGGUQCRIDQESW  | CCOC1=CC=C(C=C1)N(CCC#N)[S+][[O-]](=O)C2=CC=C(OC)C=C2  | 0.23064  |
| LGLCVGFUDURYVOD | OCC1=C(OCCCN2CCC(CC3=CC=CC=C3)CC2)C=CC=C1              | 0.239661 |
| LHFHPCWQLUDMAB  | CCN(CC)CCNC(=O)C1=CC(NS(=O)(=O)C2=CC=C(C)C=C2)=C(C=C1  | 0.235214 |
| LHPDDBGADQDQLZ  | O=C(NC1=CC=CC(=C1)NC(=O)N2CCN(CC2)C3=CC=CC=C3)N4CC     | 0.234123 |
| LHTCYYGJZPGMG   | CCC1=CC(OCCCCNCCCOC)=CC=C1                             | 0.241458 |
| LJPALRNNMOQAQU  | CC1=C(Cl)C=CC(OCC(O)CN2CCC3=C(C2)C=CC=C3)=C1           | 0.234759 |
| LKJBCQWMMWWEHB  | COC1=CC2=C(SC(=C2)C3=CC=C(O)C=C3)C4=CC(OC)=CC(OC)=C4)  | 0.23419  |
| LKTVCBAYEHDGNF  | ClC1=CC(=CC=C1)N2CCN(CC2)C(=O)CCC(=O)N3CCN(CC3)C4=C(   | 0.23013  |
| LLYNLQDHLONHOO  | CN1CCN(CC1)C(=O)CCN2C(=S)\C(=C\3=CC=C(C)C=C3)C2=O      | 0.230163 |
| LMBGOBJQESYQAC  | CC1=CC=C(NC2=C3C=CC=C(C)C3=NC(C)=C2)C=C1               | 0.262498 |

|                 |                                                        |          |
|-----------------|--------------------------------------------------------|----------|
| LMGOXKZSDSQEGF  | CSC1=C(NC(=O)CN(C)CC(=O)NC2=CC(Br)=CC=C2)C=CC=C1       | 0.276047 |
| LMNMFISQCMTDB   | CN(C)CCCCOC1=C(Cl)C=C(Cl)C=C1C                         | 0.28833  |
| LMYPKWMJCDIHHF  | O=C(CSC1=NC(=NC(=N1)N2CCCC2)N3CCCC3)N4CCN(CC4)C!       | 0.222507 |
| LNFXLMNTXMDCOI  | COC1=C(OC)C(Cl)=CC(CNC2CCCCCCC2)=C1                    | 0.284939 |
| LOLQYDGGGAQMCGH | CCC(C)C1=C(OCCCCN2CCCC2)C=CC=C1                        | 0.280798 |
| LOQNMLHIQHBJV   | FC1=CC(CN2C=C(C=O)C3=C2C=CC=C3)=CC=C1                  | 0.228063 |
| LOZNUSRYBQAASV  | CC(N(CCN(C)C)\S)=N\C1=C(C)C(Cl)=CC=C1)C2=CC=CO2        | 0.243494 |
| LPAJESSQHVIDM   | CCN(CC)CCNC(=O)C(Cl)=C1C(Cl)=C(Cl)C(Cl)=C1Cl           | 0.248022 |
| LQWYEXCCDMWGMB  | O=C(NC1=CC=C(C=C1)N2CCN(CC2)C(=O)C3=CC=CC=C3)C4=CC!    | 0.239672 |
| LQZDYPHFVGRHKD  | CC1=NC2=C(C=C1)C=CC3=C2N=CC=C3                         | 0.306735 |
| LRRFOPNECJYNMY  | FC1=CC(Br)=C(OCC(=O)NC2=C(C=CC=C2)N3CCOCC3)C=C1        | 0.242739 |
| LRXLNMZQHJZBB   | CN(C)CC(C)(C)CNC(=O)C1CCN(CC2=C(O)C=CC=C2)CC1          | 0.227419 |
| LRYLEYCCZSAPD   | CC1=C(CCCNC2CCCC2)C3=C(N1)C=CC=C3                      | 0.272759 |
| LSJRRRNUMMUDPM  | ClC1=C(\C=N\N2CCN(CC3=CC=CC=C3)CC2)C=CC=C1             | 0.239589 |
| LSKZDQMPCSMAOG  | ClC1=C(Cl)C=C(NC(=O)NC2=NOC=C2)C=C1                    | 0.230615 |
| LSQQORZIBMVTDA  | CCN(CC)CCNC(=O)C1=CC=C(NC(=O)CC2=C3C=CC=CC3=CC=C2)(    | 0.255062 |
| LSYYZRIAKZKIKI  | COC1=C(C)C=CC(NC(=O)NCCN2CCN(CC2)C3=CC=C(Cl)C=C3)=C1   | 0.234338 |
| LTBKHBIPKHIHLF  | NC1=NC(=NC2=CC=CC=C2)C3=C1C=CC=C3                      | 0.225725 |
| LTLPHMSJMFUGED  | COC1=CC(OC)=C(NC2=C3C=C(Br)C=CC3=NC=N2)C=C1            | 0.229156 |
| LTRBEDXMFQKQZ   | COC1=C(\C=C\C2=N\C=C(N(C)C)C(=O)O2)C=CC=C1             | 0.236253 |
| LTZOIUVFTDNHAC  | CN(CCOCCOC1=C(Br)C=C(Cl)C=C1)CC2=CC=CC=C2              | 0.280401 |
| LUWUGYXTIVKHKC  | ClC1=C(NC2=NC(=CS2)C3=CN=CC=C3)C=CC=C1                 | 0.232263 |
| LVGSNEOJUMDTFM  | CCOC(=O)C1=C(NC(=O)CCN2CCC(C)CC2)C3=C(N1)C=CC(Br)=C3   | 0.227107 |
| LVPMCHZTOXKOHN  | CCN1CCN(CC1)C2=C(N=C(O2)C3=CC=CC=C3)S(=O)(=O)C4=CC=(   | 0.272528 |
| LVUNXLQSNWTIHG  | CC1=CC=C(C=C1)C2CC3CCC(C2)N3CC4=C(F)C=CC=C4            | 0.280467 |
| LVZJHCULSIRZLW  | CC(C)OC1=C(OCCOC2=C3N=CC=CC3=CC=C2)C=CC=C1             | 0.228203 |
| LWBFQYZDAH HQOY | C(CN1CCNCC1)NC2CCCCCCCCC2                              | 0.354122 |
| LWHUJWSFJIYWGH  | ClC1=CC(NC(=O)OCCOC(=O)NC2=CC(Cl)=CC=C2)=CC=C1         | 0.240284 |
| LWLWWFQDABJJFE  | O=C(CN1CCN(CC1)C2=CC=CC=C2)NC3=C(SC4=CC=CC=C4)C=CC     | 0.243553 |
| LWWPJRYUNFTHPP  | CC(C)(CN1CCC2=C(C1)C=CC=C2)NS(=O)(=O)C3=CC=C(Cl)C=C3   | 0.224593 |
| LWWPQTIAHAKPKT  | CC1CCN(CC(=O)N2C3=C(CCCC3)C4=C2C=CC=C4)CC1             | 0.226767 |
| LXLLBCDJEITFLG  | COC1=C(NC(=O)CN2CCN(CC2)C3=C(F)C=CC=C3)C=C(C)C=C1      | 0.235255 |
| LXLKXSWZSSPDT   | CC(C)CN1C(\C=N\NC2=NC3=C(N2)C=CC=C3)=NC4=C1C=CC=C4     | 0.234595 |
| LYHNXOLTRNCOGM  | FC1=CC=C(C=C1)C2=NN=C(CN3CCC(CC3)C4=NC5=C(S4)C=CC=(    | 0.223361 |
| LYSTXBLNUSUUQY  | CN1CCN(CC1)C2CC3=C(SC4=C2C=CC(=C4)C(F)(F)F)C=CC=C3     | 0.329511 |
| LYVCFZODSMSCFI  | CCN1C(=NC2=C1C=CC=C2)N3CCN(CC3)S(=O)(=O)C4=CC=C(OC)    | 0.263297 |
| LZCNZJRG NPKXNZ | CC1=CC=C(C=C1)N2C=C(CN3CCN(CC3)C4=NC=CC=C4)C(=N2)C!    | 0.33371  |
| LZHKJGDGNDVNAT  | CC1CCN(CC1)CC(O)COC2=C(C)C=CC(=C2C)C                   | 0.23389  |
| LZTFBZHIRAVIKX  | ClC1=CC(Cl)=C(OCC2=CC(=NO2)C3=CC=CC=C3)C=C1            | 0.225416 |
| MAAFYYHIGLBPFM  | CC(C)NC(=O)O\N=C(/C)C1=C(C)N=C(S1)C2=CC=C(Cl)C=C2      | 0.226658 |
| MASXUXOPBHEMES  | CCC(C)NCCCCOC1=CC=C(Br)C=C1                            | 0.26531  |
| MATVQBKTCQLKHX  | CCOC1=C(C=CC=C1)N2CCN(CC2)C(=O)C3=C(OC)C=C4C=CC=CC     | 0.229418 |
| MAZMDDQJPLHOGX  | COC1=CC(=CC(OC)=C1OC)C(=O)OCCC2=CC3=C(C=CC=C3)C(=O)(   | 0.232859 |
| MBFJXJXTFLDDHM  | COC1=CC=C(NS(=O)(=O)C2=CC(N\C(=N)\S(=O)(=O)C3=CC=CC=C3 | 0.239287 |
| MBJXWDYDOGMUJI  | COC1=C(OC)C=C(CCN(C)S)=NCCC2=CC(OC)=C(OC)C=C2)C=C1     | 0.244022 |
| MBYRHGK OUBURHB | [O-][N+](=O)C1=CC=C(C=C1)C2=CSC(=N2)N3CCCCC3           | 0.223195 |
| MCELMSQHTKQYLN  | CCN(CC)CC(=O)NC1=NC(=CS1)C2=CC=C(Cl)C=C2               | 0.227735 |
| MCOOYONNVNRHBQ  | COC1=CC=C(C=C1)C(CNC(=O)C2=CC(NS(=O)(=O)C3=CC=C(Br)C=  | 0.225793 |

|                 |                                                          |          |
|-----------------|----------------------------------------------------------|----------|
| MCRQBNZKVVYOII  | CN(C)CC\C=C1/C2=C(SC3=C1C=C(CI)C(F)=C3)C=CC=C2           | 0.289403 |
| MCTCFRQYPIHWTI  | CCN(CC)CCCNC1=C(N=C(O1)C2=CC=CC(=C2)CI)C#N               | 0.227528 |
| MCYLLDYDHQBNTN  | CCN(CC)C1=CC=C(NC(=O)C2=CC(=CC(=C2)OC)OC)C(=C1)C         | 0.222697 |
| MCYRPWJNPNZAT   | CCCCOC1=CC=C(NC2=NC3(CCCC3)N=C(N)N2)C=C1                 | 0.230198 |
| MDNVEDZFPGSWSN  | CCN(CC)CCOCCOC1=CC(C)=C(CI)C(C)=C1                       | 0.258201 |
| MDSZVKQTJAQFFG  | COC1=C(OC2CCCC2)C(Br)=CC(CNCC(C)C)=C1                    | 0.234232 |
| MEEFFYUZIUCGGQ  | COC(=O)\C1=C(/C)N(C)\C=C(/C1C2=CC=C(F)C(=C2)Br)C(=O)OC   | 0.224829 |
| MENNRQXMFWMWAH  | CCNC1=NC(=CS1)C2=CC=C(CI)C=C2                            | 0.258612 |
| MFDISVMGGKXHMR  | CC1=C(C)C(C(N2CCN(CCO)CC2)C3=CC=C(CI)C=C3)=C(NC(=O)C4    | 0.230014 |
| MFKATAJWLKTKPM  | CCN(CC)CCNC1=NC(=C(S1)C2=CC=C(OC)C=C2)C3=CC=C(OC)C=C     | 0.260814 |
| MFPKDUIMNIPMSH  | CCCCNCCOC1=C(C=CC=C1)C2=CC=CC=C2                         | 0.266096 |
| MFROXXGQCVDJFE  | CIC1=C(CN(CC2=CC=CC=C2)C(C3=CC=CS3)C4=NN=NN4C5CCCC       | 0.272057 |
| MFSFAIBGVJXGNV  | CC(C)C1=CC(OCC(O)CN2CCC3=C(C2)C=CC=C3)=CC(C)=C1          | 0.225313 |
| MFTIGMUEIADPNR  | CIC1=C(C=CC(NC(=O)C2=CC=CS2)=C1)N3CCCC3                  | 0.231409 |
| MFUANMKFOSVLLJ  | COC1=CC2=C(C=C1OC)C(=C(S2)C3=C(OC)C=CC=C3)C4=CC=C(O      | 0.226152 |
| MFUCBYRUQFMVJU  | COC1=C(SC2=CC=C(F)C=C2)N=C(N=C1)C3=NC=CC=C3              | 0.223398 |
| MGAPEMLRADUNBX  | COC1=C(OC)C=C(CN2CCCC(O)(CC3=CC(CI)=CC=C3)C2)C(CI)=C     | 0.237476 |
| MGXNYBVKEOWFQD  | FC1=CC=C(C=C1)N2CCN(CC2)C(=O)C3=CC(=CC=C3)C(=O)N4CC      | 0.241059 |
| MHXGKAPEFLBBDT  | CC1=NC2=C(C=CC=C2)C(NC3=CC(Br)=CC=C3)=C1                 | 0.24724  |
| MISTWAYDZLXUKR  | FC1=CC=C(C=C1)C(N2CCN(CC2)C3=CC=CC=C3)C4=NN=NN4CC        | 0.262698 |
| MJHDJQNJJVZMOI  | N=C1N(CCN2CCCC2)C3=C(C=CC=C3)N1CC(=O)C4=CC=CS4           | 0.284813 |
| MJWWSXOBWDMJJP  | SC(NC1CCCC1)=NC2=CC=C(OC3=CC=CC=C3)C=C2                  | 0.222387 |
| MKBPIXLWYBWKRN  | CIC1=NC(=NC(CS(=O)(=O)C2=CC=CC=C2)=C1)C3=CC=CC=C3        | 0.2423   |
| MKCPUDVEFDAXLS  | O=S(=O)(OC1=C(C=CC=C1)C2=CC=CC=C2)C3=CC=CC=C3            | 0.299698 |
| MLADKRXBDKHQRM  | N#CC(C#N)=C1SC(=N/C2=CC=CC=C2)\C(N1C3=CC=CC=C3)=N\C      | 0.269445 |
| MLLXHGHZOGOBQS  | CCCC(=O)N1CCN(CC1)C2=NC3=C(S2)C=C(Br)C=C3                | 0.225281 |
| MLSJRXCETXEQCG  | CIC1=C(C=CC=C1)C(=O)NC2=CC=C(C=C2)N3CCN(CC3)C(=O)C4=     | 0.235173 |
| MLUXVLCNFWSIJG  | CCOC(=O)C2(CCOC1=CC=CC=C1)CCN(CC3=C(OC)C=CC(OC)=C3)      | 0.225335 |
| MMOBBISAVIKZPP  | C(CN1CCCC1)N2C(NCC3=NC4=C(C=CC=C4)N3CC5=CC=CC=C5         | 0.232415 |
| MMPRERRXDROFNS  | CC1=CC(NC(=O)N2CCN(CC3=CC=C(CI)C=C3)CC2)=CC=C1           | 0.238198 |
| MMROUTXCZBZOQOB | FC1=CC=C(CN(CC2=CC=CC=C2)C(\S)=N\CC=C)C=C1               | 0.225568 |
| MNMXYGUYRMIBKV  | CC1=C(C=C(CI)C=C1)N2CCN(CC2)C(\S)=N\CCC3=CC=CC=C3        | 0.223377 |
| MNTVKKVDXXLKKV  | CCOC(=O)N\N=C\C1=CC(OCC)=C(OCCSC2=CC=C(CI)C=C2)C=C1      | 0.244565 |
| MOQCKKLCFQKGQK  | CN1C=C(CN2CCN(CC2)C3=CC=CC=C3)C4=CC=CC=C14               | 0.274214 |
| MOUFAXAHQFOEA   | FC1=CC=C(NC(=O)NC2=NN=C(COC3=C(F)C=CC=C3)S2)C=C1         | 0.225951 |
| MPGPLWGAOFVVRH  | CN(CC\C=C1/C2=C(CSC3=C1C=CC=C3)C=CC=C2)CC=C              | 0.329983 |
| MPXWIWCJZHUHQR  | CN1CCC(CC1)OC2=C(SC3=CC=C(C=C3)C(F)(F)F)C=CC=C2          | 0.234346 |
| MQRVZQONLUTKMA  | CCC(COC)NCC1=CN(N=C1C2=CC(F)=CC=C2)C3=CC=C(OC)C=C3       | 0.245043 |
| MQTJTRXFDSDSOO  | O=C(OC1CN2CCC1CC2)C34CC5CC(CC(C5)C3)C4                   | 0.24313  |
| MQVPADVOISVUVJ  | CC[N+]=C(OC2=C1C=CC=C2)\C=C\N(C)C3=CC=CC=C3              | 0.243358 |
| MSEWEKWTCTRFOSN | [O-][N+](=O)C1=C(\C=N\NC(S)=N\N=C\C2=C(C=CC=C2)[N+][[O-] | 0.264813 |
| MSWDFRIWVJZPPP  | Cl.CCN(CC)CCN(C(=O)C1=C/C=C(\C=C\1)S(=O)(=O)N2CCCC2)C3   | 0.377831 |
| MSXJLGPMPFKMAX  | CC1=CC=C(C=C1)S(=O)(=O)OC2=C(\C=N\N=C(/N)S)C=CC=C2       | 0.234305 |
| MSZIWZSPLVWFC   | CC1CCN(CCNC(S)=NC2=CC=C(CI)C=C2)CC1                      | 0.293474 |
| MTTFIFPOMXQPCT  | NC(=O)N\N=C/C(CCCCC\C(C1=CC=CC=C1)=N/NC(N)=O)C2=CC=C     | 0.239284 |
| MTUAPGDJRRQAHE  | CCOC(=O)C1=C(CN2CCCC2)[N](C)C3=CC=C(OC)C=C13)Br          | 0.252439 |
| MUBRJekkjanjnx  | CN(C)CCCC1SC2=C(SC3=C1C=CC=C3)C=CC=C2                    | 0.361686 |
| MUJWOXGLZLOSIV  | CN(CCOC1=CC=CC=C1)CC(O)COCC2=C(F)C=CC=C2                 | 0.242121 |

|                 |                                                         |          |
|-----------------|---------------------------------------------------------|----------|
| MUWHRGFVOPWZOJ  | COC1=C(O)C=C(\C=N\N2CCN(CC2)C3C4=C(C=CC=C4)C5=C3C=C     | 0.25729  |
| MVFCUKAAQGQILZ  | CN1CCN(CC1)C(\S)=N\C2=CC(CI)=C(CI)C=C2                  | 0.24753  |
| MVFPBEURBHRCAM  | CCOC(=O)C1=C(C)N(C)C(C)=C(C1C2=CSC=C2)C(=O)OCC          | 0.236852 |
| MVZKFDJVVINAQD  | CCOC(=O)C2(CC1=CC(OC)=CC=C1)CCN(CC3=C(OC)C=CC=C3)CC     | 0.269732 |
| MWIAMPGAACPVE   | COC1=CC(OC)=C(Br)C=C1CN2CCN(CC2)C3=CC=C(F)C=C3          | 0.238368 |
| MWNXWDMQBOTMKX  | CC(C)COC1=C(CI)C=C(C\N=C(/N)N=C(N)N)C=C1                | 0.23559  |
| MWXFTOXDRVAKHI  | [O-][N+](=O)C1=C(CI)C=CC(NC(=O)CN(C2CCCC2)C(=O)C3=C(CI) | 0.222791 |
| MXBMUNASOBPHAY  | COC1=CC=C(C=C1)N=C(S)N\C(=N\S(=O)(=O)C2=CC=C(CI)C=C2)C  | 0.223534 |
| MXHWGHJBQPQAJ   | CC1CCCN(C1)C2=C(N)C=C(F)C=C2                            | 0.249301 |
| MXJXDBQPBACLHB  | C(N1CCN(CC1)C2=NC3=C4C2=CC=CC4=CC=C3)C5=CC=CC=C5        | 0.238792 |
| MXXNAZFNHJOMJ   | CC1=C(C=CC(F)=C1)S(=O)(=O)NC2=C(C=CC=C2)C(=O)NC3CCN(C   | 0.222566 |
| MXXPOBMGINPDNZ  | CN(C)CCCNC(=O)C(\NC(=O)C1=CC=C(C)C=C1)=C\C2=CC=C(O2)C   | 0.241409 |
| MYUVOPXZMCGDAD  | CC1=CC=CC2=C3N(CCC3=C(C)N=C12)C4=C(F)C=CC=C4            | 0.270714 |
| MZGDYPYPJYRXIN  | CN(C)CCCNC1=CC(C)=C(C#N)C2=NC3=C(C=CC=C3)N12            | 0.223842 |
| MZJADLNSIFQRAD  | OC(COCC1=CC=CS1)CN2CCN(CC2)C3=CC(=CC=C3)C(F)(F)F        | 0.240154 |
| MZLZAPCURITIDY  | NC1=CC(=NN1CC2=CC=CC=C2)C3=CC(Br)=CC=C3                 | 0.227613 |
| MZPFILZBJZGYHV  | CN1\C(SC2=C1C=C(C)C=C2)=C\C3=[N+](C)C=CC=C3             | 0.231265 |
| MZYURQUUEUMCEN  | CCN(CC)CCN1CCN(CC1)C2=NC(=CN=C2)C3=CC4=C(C=CC=C4)C      | 0.236176 |
| NAVBYVMNDQAODN  | CSC1=C(C=CC=C1)C(=O)C2CCCN(CC3=CN(N=C3)C4=CC=CC=C4)     | 0.266511 |
| NAVODTIWKOIFKW  | CCOC(=O)C2(CCOC1=CC=CC=C1)CCN(CC3=CC=C(OC)C=C3)CC2      | 0.251465 |
| NBASXBUUNPZFKJ  | O=C(N1CCN(CC1)C(C2=CC=CC=C2)C3=CC=CC=C3)C4=CC=C(C=C     | 0.224915 |
| NBGRRSVGTIFHDF  | CN1CCN(CC1)C(=O)C2=CC=C(\C=C3/SC4=C(C=CC=C4)N(CC5=C     | 0.243335 |
| NBKOLADYUCUELK  | COC1=CC(=CC(OC)=C1OC)C2NC(S)=NC(=C2)C34CC5CC(CC(C5)C    | 0.229427 |
| NBRRQUKYSKMP CJ | CCCCCCN1C2=NCCCN2C3=C1C=CC=C3                           | 0.26022  |
| NBSBWIMTXRSXFJ  | CCN(CCCCN(C)C)CC1=CC2=C(O1)C=CC=C2                      | 0.290093 |
| NCFXAMQSYIPRDN  | COC1=C(C=CC=C1)C(=O)NC(CCSC)C(=O)NCCCSC2=CC=CC=C2       | 0.231126 |
| NCIAFIKSYBXAIL  | COC1=CC=C(C=C1)C2=NOC(=N2)N3CCC(CC3)C(=O)NC4=CC(OC      | 0.224304 |
| NCSSTRALCUMWTF  | [O-][N+](=O)C1=CC=C(NC(=O)NCCN2CCC3=C(C2)C=CC=C3)C=C1   | 0.225946 |
| NCVYEHIMKMRBGA  | CIC1=CC=C(\C=N\NC(=O)CN2C3=C(SC4=C2C=CC=C4)C=CC=C3)     | 0.224977 |
| NDPZKSDUMMEMSO  | COC1=CC=C(C=C1)C2=C3C=C(CI)C=CC3=NO2                    | 0.227716 |
| NEAXSQKYNELCG   | COC1=CC=C(C=C1)C2=NOC(=N2)C3=CC=C(CI)C=C3               | 0.263806 |
| NEFUEHMALDWNGS  | COC1=CC(=CC(OC)=C1)C2=C(C3=C(C=CC(=C3)C4=CC=CC5=C4C     | 0.230977 |
| NEKJZJSWJMAZRZ  | COC1=C(C=CC=C1)N2CCN(CC3=C(OC)C(OC)=C(OC)C=C3)CC2       | 0.242823 |
| NEXKTFZNLLSLEA  | CC1N(CCC2=C1C=C3OCCOC3=C2)C(=O)C4=CC=C(CI)C=C4          | 0.227404 |
| NEYNGVZPW CJUMP | CCN1CCN(CCCOC2=C(OC)C=C(C=C2)\C=C\C)CC1                 | 0.252141 |
| NFFRAGZFPYNZGL  | CC1=CC(N2CCN(CC2)C3=C(C=CC=N3)[N+](O)=C(C)C=C1          | 0.291482 |
| NFWFNKQJHIUIBD  | N#CC1=C2CCN(CC3=CC=CC=C3)CC2=C(N=C1N4CCCC4)N5CC         | 0.228373 |
| NGDDKXSLDUONKY  | O=C(CN(CC1=CC=CC=C1)CC2=CC=CC=C2)NC3=C(C=CC=C3)C#N      | 0.231371 |
| NGLCJCLFLUWKGH  | COC1=NC(=NC(=N1)N2CCOCC2)N3C=CC=C3                      | 0.249403 |
| NGSKLXHESMVWCC  | CC(=O)C1=C(C)NC(C(=O)OCC2=CC=C(Br)C=C2)=C1C             | 0.232204 |
| NGXUEHOVTWDIHS  | COC1=C(OCC2=C(CI)C=C(CI)C=C2)C=CC(=C1)C(=O)NCCC(C)C     | 0.226166 |
| NHGOPUUUGHBRSD  | CC(=C)CNC(S)=N\N=C\C1=CC=C(C=C1)N2CCOCC2                | 0.234985 |
| NHGRAHAVFNGAOG  | C[C@H](CO)N1C[C@H](C)[C@H](CN(C)CC2=CC=CC=C2)OC3=C      | 0.228438 |
| NHXXAIOLFGICFD  | CN1CCN(CC1)C2=C(NC(=O)CCC3=NC(=NO3)C4=CC=C(C)C=C4)C     | 0.23216  |
| NHYVUVPOXQKFDX  | CC1=C(CN2CCC(CC2)C(=O)N3CCN(CC3)CC4=CC=CC=C4)N=C(O      | 0.233755 |
| NHZBQJDEXLJZPQ  | COC1=C(OCC2=CC=CC=C2)C=CC(CN3CCC(C)CC3)=C1              | 0.250758 |
| NIJTUDCAEFZYJX  | CC(C)NS(=O)(=O)C1=CC=C(OC2=C(CI)C=C(C=N2)C(F)(F)F)C=C1  | 0.247566 |
| NIKUGIVXOLBYIT  | C(N1N=NN=C1C(N2CCN(CC3=CC=CC=C3)CC2)C4=CC=CC=C4)C       | 0.334247 |

|                 |                                                         |          |
|-----------------|---------------------------------------------------------|----------|
| NIUUWDFMVWJKAN  | CC1=C(C)C(CN2CCCCC2)=C(NC(=O)C3=CC=C(F)C=C3)S1          | 0.258062 |
| NIWPGRIRBQXFLJ  | COC1=CC=C(C=C1OC)C2=CC(Chem Div,C130-0360               | 0.233245 |
| NJPYPBRTHCCIND  | CN(CC1COCCO1)CC2=NC(=NO2)C(C3=CC=CC=C3)C4=CC=CC=C       | 0.223789 |
| NJSCBCNYQNEEFZ  | COC1=C(OCC2=CC=CC=C2)C=C(CN3CCN(CC3)C4=NC=CC=C4)C:      | 0.230855 |
| NJSNJYYYFPTSXR  | CN1N=NN=C1SCCNCC2=C(OCC3=CC=C(Cl)C=C3)C=CC=C2           | 0.269951 |
| NJSSNAKBDXXDTB  | COC1=CC(OC)=C(C=C1)C2C(C)C(OC3=C2C=C4OCOC4=C3)N5CC      | 0.249421 |
| NJVIJAZYKLEPBH  | OCl(=O)(=O)=O.CC1=[N+](CCC2=CC=CC=C2)C(=CC(=C1)C3=CC=C  | 0.235902 |
| NJYXCXKGCXKMB   | COC1=C(OS(=O)(=O)C2=CC=CC=C2)C=CC(\C=N\NC(=O)C3=CC=C    | 0.240582 |
| NKEAWKMGMDMDQI  | OC(COCC1=CC=C(Cl)C=C1)CN2CCN(CC2)CC(O)COCC3=CC=C(Cl)    | 0.2552   |
| NKHPIUHDBXIEIT  | COC1=CC=C(N\C(S)=N\N(C)C(\S)=N\C2=CC=C(OC)C=C2)C=C1     | 0.225608 |
| NKLGHVMBNHNNG   | OC1=CC=C(C[C@H]2CNCCN2CCCC3CCCC3)C=C1                   | 0.257142 |
| NKYSCFSNEBARFK  | CCN(CC)S(=O)(=O)C1=CC=C(OC2=CC=C(C=C2)S(=O)(=O)N(CC)CC  | 0.249693 |
| NLBCTXFSWJUTED  | COCCCN1=NN=C(CS1)C2=C(C)N(C(C)=C2)C3=CC=CC=C3F          | 0.243912 |
| NLCXYBYOMZRHXHQ | COC1=C(O)C=CC(CN(C)CC2CCN(CCC3=CC(=CC=C3)C(F)(F)F)C2    | 0.236994 |
| NLEDPRHIQSRERF  | C\C(=N\NC1=CC(Cl)=C(Cl)C=C1)C2=CC=C(C=C2)N3C=CN=C3      | 0.235946 |
| NLPGJEYPMXWQX   | COC1=C(OC)C(CN(C)CC2CCN(CCC3=CC=C(Cl)C=C3)C2)=CC=C1     | 0.322405 |
| NMCKETLUGKTIKJ  | CN(C)S(=O)(=O)C1=CC=CC(CSCC2=CC=CC(=C2)S(=O)(=O)N(C)C)= | 0.26485  |
| NMGVVVOTFVENON  | CCOC1=CC=C(C=C1)S(=O)(=O)N(C)C2=CC=C(OC(=O)NCC3CCCC     | 0.24759  |
| NNAYUDQWATWDIH  | CN(CCOC1=CC(Cl)=C(Cl)C=C1)CC2=CC=CC=C2                  | 0.239553 |
| NNBOWLVAZHNNP   | CCOC(=O)C1(CCOC)CCN(CC2=CC(OC3=CC=CC=C3)=CC=C2)CC:      | 0.233504 |
| NNMIYIGWDKMLNX  | ClC1=CC=C(NC(=O)NC2=NN=C(CSC3=CC=C(Cl)C=C3)S2)C=C1      | 0.230715 |
| NNPNQLZPNNQNSI  | COC1=CC=C(CN2CCN(CC3=C(F)C=CC=C3)CC2)C=C1               | 0.262034 |
| NNQVKTYGEHCQRH  | CCCN1CCN(CC1)C2=NC=NC3=C2N=N[N]3CC4=CC=CC=C4            | 0.238649 |
| NODDDZXVWVZZRD  | CCSC1=NC2=C(C=CC=C2)N1CC3=CC(=CC=C3)[N+](O)=O           | 0.222439 |
| NOOFIJSXSDSEBF  | COC1=CC(O)=C(C=C1)C2=NOC(C)=C2C3=NC4=C(C=CC=C4)C=C3     | 0.227127 |
| NOWWAJANJXDNIM  | CN(CCCNC(=O)CSC1=CC(=O)N(C)C2=C1C=C(Cl)C=C2)CC3=CC=C    | 0.227526 |
| NOYMGARZIVMHHD  | CCN1C(=S)N=C(N2CCN(CC2)C(C3=CC=CC=C3)C4=CC=CC=C4)C(     | 0.226482 |
| NPAULTDWEBGYBH  | CCCCOC1=CC=C(CN2CCN(CC)CC2)C=C1                         | 0.259732 |
| NPFJSHWFQCKVOT  | FC1=C(C=CC=C1)C(N2CCN(CC3=CC=CC=C3)CC2)C4=NN=NN4C       | 0.240869 |
| NPKXHGFROMICTD  | [I-].CC[N+]=C(\C=C\C2=C\C(=C/C=C\2O)[N+](O)=O)/C=C\C3=  | 0.290346 |
| NPLRQONUDJNTDV  | COC1=C(OCC2=C(Cl)C=CC=C2Cl)C(Br)=CC(CNN3N=NN=C3N)=C     | 0.240794 |
| NQAPTYPIVMULPE  | CC1=C(\C=N\NC2=C3C=CC(Cl)=CC3=NC=C2)C=CC=C1             | 0.231179 |
| NQLJNUIURVHLKPA | CCN(CC1CCN(CCC2=CC(F)=CC=C2)C1)CC3=CC=C(O)C=C3          | 0.245332 |
| NQTKVLVVQBKXOK  | CCOC(=O)C1=CC=C(C=C1)N=C(S)N(CCCN2CCCC(C)C2)CC3=CC=C    | 0.260099 |
| NQUWDWKVYGPVAA  | COC1=CC=C(C=C1)C(N2CCC(C)CC2)C3=NN=NN3C4CCCC4           | 0.241849 |
| NQVKNMMSJMBTSN  | CCN1C2=C(C=C(Cl)C=C2)C3=C1N=C4C=CC=CC4=N3               | 0.231015 |
| NRAHRUHGPGBWSI  | N1C=CC(=N1)C2=CN=C(S2)C3=CC=CC=C3                       | 0.226261 |
| NRIBYXIOCGUVEW  | CCC1=NC(SCC2=CC=C(OC(C)C)C=C2)=NN1                      | 0.227726 |
| NRTOUGPMXLJETQ  | COC1=CC(=CC(OC)=C1O)C2=CC(OC)=C(O)C(OC)=C2              | 0.251874 |
| NRXCJQXKEIOFHO  | COC(=O)C1=CC=C(CSC(N)=N)O1                              | 0.264993 |
| NTDIRJAXHHBYGY  | CC1=CC(NC(=O)COC2=COC(CN3CCC4=C(C3)C=CC=C4)=CC2=O):     | 0.225776 |
| NTRYPVBJLOOHU   | CCN1CCN(CC1)C(C(C)NS(=O)(=O)C2=CC=C(Br)C=C2)C3=CC=CC=C3 | 0.235383 |
| NUDBAUWWKREJBT  | ClC1=CC=C(CN2C3=NCCCN3C4=C2C=CC=C4)C=C1                 | 0.248707 |
| NUFCKOACLZMZR   | CC1=CC=C(CSCC2=NC3=C(N2)C=CC=C3)C=C1                    | 0.229795 |
| NUFNKYNBZYIQDG  | CCC1=C(C(N)=NC(N)=N1)C2=CC(=C(C=C2)N(C)CC3=CC=CC=C3)[   | 0.244423 |
| NUYMLBCETWIHJM  | C[N]1C=C(CN2CCC3=CC=CC=C3C2)C4=CC=CC=C14                | 0.22958  |
| NVJHCEJHMDWDFNV | CN(C)C(CNC1=NC=C(C=C1)C(F)(F)F)C2=CC=CC=C2              | 0.22731  |
| NWDMYZDYCGOYAZ  | CCOC1=C(\C=N\N2CCCCC2)C=CC=C1                           | 0.256487 |

|                |                                                        |          |
|----------------|--------------------------------------------------------|----------|
| NWFHWIJRCYRLGB | CC1=CC(C)=NC(N\N=C\C2=C(OCC3=CC=CC=C3)C=CC=C2)=N1      | 0.240984 |
| NWSJIQYNDOWTDK | COC1=C(C=CC=C1)N2CCN(CC3=C(Br)C=C4OCCOC4=C3)CC2        | 0.248846 |
| NWVBMKUDSFGYDY | C1CCN(C1)C2=NC=NC3=C2C(=CS3)C4COC5=C(O4)C=CC=C5        | 0.246918 |
| NWVGHEMPUOSLMU | CC1=CC(N=C(S)N\N=C2/CCCCC3=C2C=CC=C3)=C(C)C=C1         | 0.232984 |
| NXHUITDSVPREHK | CCOC1=CC2=C(NC(=O)C(CN(CC3=CC=CS3)CC4=NN=NN4C(C)(C)    | 0.230964 |
| NYAWOVVANLFBCL | CC1=C(C=CO1)C(=O)NC2CCCN(CC3=CC=C(Cl)C=C3)C2           | 0.228514 |
| NYFOZLVGZIFOIG | COC1=C(OC)C=C(CC2=NC3=C(O2)C=C(C=C3)C(=O)N4CCN(C)C(C   | 0.233072 |
| NYKHZQZVEDDAKR | COC1=C(OC)C=C(CCN2=NC(=NC(=N2)N3CCCCC3)N4CCCCC4)(      | 0.253609 |
| NYRBOWGJJQEQOK | COC1=C(C=CC=C1)N2CCN(CC(O)COC3=CC4=C(OCO4)C=C3)CC2     | 0.223953 |
| NYWREHRGJLDICR | COC1=C(COC2=CC=C(F)C=C2)C=C(C=C1)C3NCCC4=C3NC5=C4C     | 0.226179 |
| NYXUKPHUZOEPNR | CN1CCN(CC1)C(=O)COC2=CC=C(C=C2)C3=NC4=CC=CC=C4S3       | 0.226416 |
| NZBRDGAGPLPQPH | CCN(CC1=CC=CC=C1)C2=CC=C(C=N\NC(S)=NC(C)C)C=C2         | 0.265238 |
| NZH0HWSINPTXPQ | COC1=CC=C(CN2N=NN=C2C(C(C)C)N3CCN(CC3)C4=C(OC)C=CC     | 0.244259 |
| NZIGRAASRJILNH | COC1=C(OC)C=C2CN(CC(=O)NC3=C(Cl)C=C(Cl)C=C3)CCC2=C1    | 0.227193 |
| NZJWCUHISVYEOK | CC1=CC=CC(NC(=O)C2=NC=C(C=C2)C(=O)NC3=CC=CC(C)=C3)=C   | 0.241218 |
| NZZYIRXZGXNWJR | CCOC(=O)C2(CC1=CC(OC)=CC=C1)CCN(CC3=C(OC)C(OC)=CC=C3   | 0.290667 |
| OAHORWXWNJJTCJ | OC(COC1=CC=CC=C1)CN=C2SC3=C(C=CC=C3)N2CC(O)COC4=C(C    | 0.22637  |
| OAKVQEUFBQIFTE | CC(C)NC1=NC(=NC(NC(C)C)=N1)N(CCOC2=C(Cl)C=C(Cl)C=C2)C# | 0.229525 |
| OAPPEBNXKAKQGS | C1=CC2=C(C=C1)N=C3C(C=CC4=C3C=CC=C4)=C2                | 0.235269 |
| OASVHPVKKHWSHO | FC1=CC=C(C=C1)C(=O)N=C(S)NC2CCN(CC3=CC=CC=C3)CC2       | 0.23711  |
| OBAOVVRDVKOEAF | C\C(CCN1CC1)=N/NC(=O)NC2=C3C=CC=CC3=CC=C2              | 0.236051 |
| OBHKLQMTGZZBU  | COC1=C(OCC(=O)NC2=CC(=CC=C2)C(F)(F)F)C=CC(=C1)C(=O)NCC | 0.292299 |
| OBOZOKPRZDQAO  | OC(CN1CCCC1)CN(C2=CC=CC=C2)C3=CC=CC=C3                 | 0.238781 |
| OBUAGBRWSIDKKW | CC1=CC=C(SCCCCN2CCNCC2)C=C1                            | 0.224527 |
| OCAUAABUWCCDBI | COC1=CC=C(NS(=O)(=O)C2=C(C=CC(NC(=O)C3CC3)=C2)N4CCCC   | 0.232637 |
| OCCMEOCLGLVGC  | COC1=C(NC2=NC=NC3=C2C(C)=C(C)N3CCCN(C)C)C=CC=C1        | 0.250954 |
| OCMRFULKMXDHL  | CS(=O)(=O)NC1=C(C=CC=C1)C(=O)NC2=CC(Cl)=CC(Cl)=C2      | 0.225392 |
| OCPNFFSUIXBUEH | COC1=CC=C(NC(=O)C2=CC=C(C=C2)C3=CSC(C)=N3)C=C1         | 0.227245 |
| OCRQTOAPOJRQHU | CN1C=C([C@H]2C[C@H]3CN(CC4=CC(Cl)=CC=C4)C(=O)[C@H]     | 0.240621 |
| ODDAUEGZSNPDPQ | CCOC1=C(CN2CCN(CC3=CC4=C(OC3)C=CC(OC)=C4)CC2CCO)C=     | 0.226218 |
| ODNPRNWBYSQJGS | CCCCCCCC1CC(CSC(N)=N)OC1=O                             | 0.229392 |
| ODXKOGOMZIMVSZ | COC1=CC=C(C=C1)C2=C(C3=C(S2)C=C(OC)C=C3)C4=CC=C(OCC1   | 0.240236 |
| OEKJPBBWZWSQCJ | CC1=CC(NC2=NC(=CS2)C3=CN=CC=C3)=C(C)C=C1               | 0.223616 |
| OESIOUJUQWGFHC | CC1=NC(NC2=NC(=CS2)C3=CC=C(F)C=C3)=CC=C1               | 0.239959 |
| OEVWPQYNFDZFUL | CC1=CC=CC(C)=C1OCC(O)CN(CC2=C(O)C=CC=C2)C3CCCCC3       | 0.239052 |
| OFRYUDPPDRCHBQ | FC1=C(F)C=C(C=C1)C2=CSC(NC(=O)CN3CCCCC3)=N2            | 0.237626 |
| OFYMUOTCCXAHG  | CC(C)N1CCC(CC1)N2CCN(CCCC3=CC=CC=C3)CC2CCO             | 0.274477 |
| OGEGHNXZKVBMSM | CC1=CC(=NC(=N1)C2=CC=CC=C2)N3CCN(CC3)C4=CC=CC=C4       | 0.241954 |
| OGMPHYQPNSUBSE | CC1=CC(C)=C(NC(=O)NCC2CCN(CC3=C(Cl)C=CC(C)=C3)CC2)C=C  | 0.241376 |
| OGSIYSLYFZJQBT | CCOC(=O)C1=C(CN2CCN(CC2)C3=CC=C(F)C=C3)NC(=O)NC1C4=    | 0.232166 |
| OHDXDNUPVVYWOV | CNCC1=C(SC2=C3C=CC=CC3=CC=C2)C=CC=C1                   | 0.313421 |
| OHRHJQXHIWOGAW | CN(C)CCCN1C(C)=C(C)C2=C1N=CN=C2NC3CCCCC3               | 0.223176 |
| OHUNCUXJHFATEQ | CC1=CC(C)=C(NC(=NOCC2=C(Cl)C=C(Cl)C=C2)C3=NON=C3N)C=   | 0.223306 |
| OILQRYVUKMDUKO | CN1CCN(CC1)C2=CC=C(NC(=O)COC3=C(Cl)C=C(Cl)C=C3)C=C2    | 0.240558 |
| OIPUPAUENHDVRT | CCN(CC)C1=CC=C(CNC2=NC3=C(C=CC=C3)N2C(C)C)C=C1         | 0.228222 |
| OIRSXCBBXUDET  | CN1C=C(CCNCC2=CN=C2C3=CC=C(C=C3)C4=CC=CC=C4)C=N1       | 0.284319 |
| OJMFUZETINIEJ  | COC1=CC=C(CN2N=NN=C2CN(CC3=CC4=CC=CC(C)=C4NC3=O)(      | 0.227338 |
| OJNBWCGDUWDYIZ | COC1=CC(CN2CCN(CC3=CC=CC(OC)=C3OC)CC2)=CC(OC)=C1OC     | 0.232664 |

|                 |                                                       |          |
|-----------------|-------------------------------------------------------|----------|
| OJXKQCJWSXNCLH  | CCOC(=O)C2(CC1=CC(OC)=CC=C1)CCN(CC3=C(OC)C=CC(OC)=C3  | 0.279937 |
| OKDGOSIKJZJDTQ  | BrC1=CC(=CC=C1)C(=O)NC2=CC=C(CN3CCCC3)C=C2            | 0.281595 |
| OKDKHOBVYMXHNMN | CC1=CC=C(NC(C(=O)C2=CC=CC=C2)C3=CC=CC=C3)C=C1         | 0.228374 |
| OKVQPIRTVQSAKV  | COC1=CC=C(C=C1)C(N2CCN(CC2)C3=CC=CC=C3)C4=NN=N[N]4    | 0.261568 |
| OKXJVJAKOAJGBF  | CC1CN(CCOC2=C(Br)C=C(C)C=C2)CC(C)O1                   | 0.239593 |
| OLDOPIUASGGWJD  | CC1=C(OC2=CC=CC=C2)C(=NN1)C3=C(O)C(C)=C(OCC4=CN(N=C   | 0.227115 |
| OLIMZMGPCNLWIN  | CC1=CC(C)=C(C=C1)\N=C(/S)\N=C\C2=C(Cl)C=CC=C2Cl       | 0.233239 |
| OLRQEYHHPDXGTO  | C1CCN(CC1)C2=NC3=C(C=CC=C3)C(=N2)C4=CC=CC=C4          | 0.234198 |
| OMCKFLDQQYNNMS  | ClC1=CC=C(CN\2C3=CC=CC=C3N4CC/N=C24)C=C1Cl            | 0.247929 |
| OMFXLHYTWYKQQR  | CCN(C(C)C)C1=CC=C(NC(=O)C2=CC=C(C=C2)N3CCCC3=O)C=C1   | 0.230672 |
| OMSSNTRYIIEBGA  | COC1=C(Br)C=C(C=C1)C2=CSC(C)=N2                       | 0.232855 |
| ONDBOJRMDBRDNH  | CC1=CC=C(C=C1)C(N2CCSCC2)C3=NN=NN3CCC4=CC=CC=C4       | 0.257184 |
| ONMJCLPUHLOIPE  | NC(=NOC(=O)C1=C(Cl)C=C(Cl)C=C1)C2=CC=C(Cl)C=C2        | 0.234693 |
| ONNMQUCZUHOJPE  | CC\C(=C/C1=CC=C(C=C1)N(C)C)C2=CC=NC=C2                | 0.239138 |
| ONQRAYLUTWMTGL  | COC1=NC(=NC(=N1)N(C2=CC=CC=C2)C3=CC=CC=C3)N4C=CN(     | 0.247572 |
| ONTKMNGLPHNQMU  | ClC1=CC=C(C=C1)C(=O)N2CCC(CC2)C(=O)NC3=C(C=CC=C3)N4C  | 0.246384 |
| OODCZOSKGSOHOM  | COC1=C(C=CC=C1)N2C(=O)C3=CC=C(Cl)C4=CC=CC(C2=O)=C34   | 0.227704 |
| OOKVIAGCVJKVCS  | CN(CCCCCN(C)CC1=C(O)C=CC=C1)CC2=C(O)C=CC=C2           | 0.249758 |
| OOORMPLAZXXCBH  | OC(COC1=CC=C(C=C1)C\2CC\C=C2)CN3CCCC3                 | 0.23344  |
| OOPQTTTHZIVMBFO | CCCN1C(CC)=NC(=C1S(=O)(=O)C2=CC=CC=C2)[N+](O)=O       | 0.228262 |
| OOYDGWVHUBKVBPQ | CN1CCN(CC1)C(=O)C2=CC=C3C=CC=CC3=C2                   | 0.239192 |
| OPAGGJQWNIEXLG  | CC1=CC=C(C=C1)C2=NN=C3SCC(=NN23)C4=C(Br)C=CC=C4       | 0.2245   |
| OQAWLIMCQATBNU  | ClC1=CC=C(OCC2=NN=C(SCCN3CCCC3)N2CC4=CC=CO4)C=C1      | 0.241346 |
| OQILUCZKMMCJSH  | CCOC(=O)C1CCCN(CC(=O)NC2=NC(=CS2)C3=CC=CC=C3)C1       | 0.227469 |
| OQPYPSPSGERKU   | ClC1=CC=C(C=C1)C2=NOC(=N2)CN3CCCC3                    | 0.264712 |
| OQRDOWLIUBNBSG  | CN(C)CCN1=NC(CSC2=CC=CC=C2)=NC3=C1C(C)=C(C)S3         | 0.234478 |
| ORAARQDOHVSIAU  | FC1=CC(=CC=C1)C(=O)NC2=C(C=CC=C2)N3CCN(CC3)C4=CC=CC   | 0.237226 |
| ORPXTNFWZCYREN  | CCN(CC)C1=CC=C(C=C1)C(=O)[N]2C=NC3=CC=CC=C23          | 0.228426 |
| ORRBRQWJGYRRF   | [O-][N+](=O)C1=CC(NC2=NC(OCC#C)=NC(OCC#C)=N2)=CC=C1   | 0.22958  |
| OSSDAJIOWFKNQ   | COC1=CC=C(C=C1)C2=NN3C(S2)=NN=C3C4=CC=C(F)C=C4        | 0.266293 |
| OSFHFLPITLKMLA  | CC1=CC=C(CN2N=C(N=C2C3=CC=CC=C3)C4=CC=CC=C4)C=C1      | 0.233843 |
| OSTARNDTDVKCCZ  | ClC1=CC(=CC=C1)N2CCN(CC2)C(=O)C3=CC=C(CS(=O)CC4=C(Cl) | 0.22971  |
| OSUVDSBKOMZSNS  | CCN(CC)CCOC1=CC(Cl)=C(Cl)C=C1                         | 0.278416 |
| OSUYXBHXTKKQEJ  | OC1=C2N=CC=CC2=C(CN3CCC(CC4=CC=CC=C4)CC3)C=C1         | 0.225033 |
| OTBQDOKDJFEZPM  | C1CN=C(NC2=CC3=C(CCCC3)C=C2)O1                        | 0.293452 |
| OTFKDWIYZMRZMS  | CCOC1=CC=C(C=C1)O)C2=C(C=N[NH]2)C3=CC=C(OC)C(=C3)OC   | 0.224468 |
| OUNDFXNOOKXWCF  | CNC1=C(N=C(O)C2=CC=C(C)C=C2)P(=O)(C3=CC=CC=C3)C4=CC   | 0.224935 |
| OUTSTXGLOZDZJL  | COC1=C(OC)C=C(C=C1)N=C(S)N2CCN(CC2)C(C3=CC=CC=C3)C4=  | 0.235942 |
| OUMEFUOUGFYFY   | CC1=C(C)C(NP(=O)(OC2=C(F)C=CC=C2)OC3=C(F)C=CC=C3)=CC= | 0.248213 |
| OZVVRXOLAXSU    | CCCOP(=O)(C(O)C1=C(Cl)C=C(Cl)C=C1)C2=CC=C(C=C2)N(C)C  | 0.229196 |
| OVAKAUBQMKPERV  | CC1=CC(OCCCCN2C=CN=C2)=CC(C)=C1Cl                     | 0.237724 |
| OVCZPKQZQWRAGV  | COC1=CC=C(CN2N=NN=C2C(N3CCN(CC3)C4=CC=CC=C4)C5=C(     | 0.240429 |
| OVHRPJNENURSDV  | CCOC(=O)C2(CC1=CC=CC=C1C(F)(F)F)CCN(CC2)C3CCN(CC3)C(C | 0.254699 |
| OVOUZRZKLVFYQV  | FC1=C(OCCNC(=O)C2=CC(=CC=C2)S(=O)(=O)N3CCN(CC3)C4=CC  | 0.226255 |
| OVQYKMPGGSKZPK  | CCCCOC1=CC(=CC=C1)C(=O)NC2=CC=C(NC(=O)C3=CC=CS3)C=C   | 0.229504 |
| OVUNTSIMUSJINY  | C1CCCN(CC1)\N=C\C2=NC3=C(C=CC=C3)C=C2                 | 0.240621 |
| OVZUSWLKWNSJOD  | COC1=CC(=CC(OC)=C1OC)C2=CC(C(=O)NC3=CC(OC)=C(OC)C=C3  | 0.236501 |
| OWDTUONCXUNSSA  | CC(NCCCCOC1=C2C=CC=CC2=CC=C1)C3=CC=CC=C3              | 0.226735 |

|                 |                                                        |          |
|-----------------|--------------------------------------------------------|----------|
| OXDABQBVHMGPKN  | COC1=CC(NC(=O)CCOC2=CC(C)=CC=C2)=C(OC)C=C1             | 0.229476 |
| OXIUUAPQNJSCOB  | COC1=C(OC)C=C(C=C1)C2=NOC(CSC3=NN=C(CC4=CC=CC=C4)N     | 0.237593 |
| OXQLTPGYKFBPHQ  | CN(C)C1=C(N=C(O1)C2=C(Br)C=CC=C2)S(=O)(=O)C3=CC=C(C)C= | 0.233101 |
| OYBNZMLVTNWHAG  | FC1=CC=C2[N](N=NC2=C1)C3CCN(CC3)CC(=O)NC4=CC=C5CCC     | 0.23317  |
| OYBUCLJKIOAAADI | CCNC(S)=N\N=C(/C)C1=CC(=CC=C1)[N+][[O-]]=O             | 0.228858 |
| OZEPKGBSALEXRT  | CC1=NC(=CN2C1=NC3=C2C=CC=C3)C4=CC=CC=C4                | 0.237274 |
| OZQHJTWIGIWIJC  | COC1=C(C=CC=C1)\N=C(/S)N(CCN2CCCCC2)CC3=CC=CS3         | 0.257128 |
| OZUGAJOHMPMGBEQ | ClC1=CC2=C(NC(=N2)C3CCN(CC4=CC=CC=C4)CC3)C=C1          | 0.294061 |
| OZZZNNWJPKCYDI  | COC1=CC(=CC(=C1OC)OC)CN2CCN(CC2)C3=CC=CC(=C3)Cl        | 0.257203 |
| PATQZWQCQOLOBF  | CC(C)(C)C1=C(OCCOCCN2CCCCC2)C=CC=C1                    | 0.236394 |
| PAVUUPCGSDKDRN  | FC1=C(F)C=C(CN2CCN3CCCC3C2C4CCCC4)C=C1                 | 0.264503 |
| PBEQKEQBBDWRC   | CCOC1=CC=C(NC2=C3C=C(C)C=CC3=NC(C)=C2)C=C1             | 0.233993 |
| PBIHNXAJBLOCMX  | CC1=C(C=C(Cl)C=C1)\N=C(/S)NCCCSC2CCCC2                 | 0.22333  |
| PCJPGFSVSHLPA   | CCOC1=CC=C(C=C1)S(=O)(=O)NC2=CC=CC(=C2)C(=O)NCC3(CCC   | 0.223952 |
| PCKQHEDPQDBDDQ  | ClC1=CC(=CC=C1)C2=NC3=C(C=CC=C3)C(=C2)C(=O)NC4=NC=C(   | 0.231884 |
| PCPKYJIEWIMBSR  | COC1=CC2=C(SC=C2C3=CC=C(OCCN4CCCC4)C=C3)C5=CC=CC(      | 0.264106 |
| PCTVRHUKEDNDHW  | CCOC1=NC=CC=C1C(=O)OCC2=CC=C(C=C2)C(=O)OC              | 0.225854 |
| PCUNCOIBDCFEGQ  | COC1=C(C=CC=C1)N2CCN(CC2)C(=O)C3=CC(=C(Cl)C=C3)S(=O)(= | 0.223463 |
| PDCTWJVTWDDQFM  | CCN1C=CN=C1CN2CCC3=C(NC4=C3C=CC=C4)C2C(C)(C)C          | 0.229822 |
| PDIBOQMOKOEPCF  | COC1=CC=C(C=C1)C2=NOC(=N2)C3=CC=C(C)C=C3               | 0.224321 |
| PDIPALLOXOFUBU  | NC(CC1=CC=C(Cl)C=C1)=NOC(=O)C2=C3C=CC=CC3=CC=C2        | 0.224989 |
| PDIQWISRAALROZ  | COC1=CC=CC(CNCC2=CC(Br)=C(OC)C=C2)=C1OC                | 0.250639 |
| PDMCEANFOLKQBG  | CCOC1=CC=C(NS(=O)(=O)C2=CC(=CC=C2)C(=O)N3CCN(C\C=C\C   | 0.222877 |
| PDMZJRHSPLGFQQ  | FC1=CC=C(COC2=CC(CNCC3=CC=NC=C3)=CC=C2)C=C1            | 0.278316 |
| PDSHNUNLUUHOES  | CC1=CC(=C(C)S1)C2=NN(C=C2CN3CCCC(CO)C3)C4=C(F)C=CC=C   | 0.233648 |
| PEDXFVUGTVCQDZ  | COC1=C(CN2CCN(CC2)C3=NC=CC=N3)C=C(Br)C=C1              | 0.245896 |
| PEJZJCVAZAFKKV  | COC1=C(CN(C)C(=O)C2=C3C=CC=CC3=NC(=C2)C4=CC=CS4)C=C    | 0.234301 |
| PENRCLWAKGETBX  | CN(C)CCCN(C(=O)C1=CC=CO1)C2=NC3=C(S2)C=C(Br)C=C3       | 0.229385 |
| PEUNWKYKBOFBPY  | COC1=C(Cl)C=C(C=C1)N=C(S)N(CCCN2CCCC2)CC3=CC=CN3CC4    | 0.225206 |
| PFCHQLSWOQFFKU  | ClC1=CC=C(C=C1)S(=O)(=O)CC2=C(Cl)C=C(Cl)C=C2           | 0.258638 |
| PGAOLCBUVAGNHE  | CN1N=C(C=C1NC(=O)NC2=CC(Cl)=CC(Cl)=C2)C(C)(C)C         | 0.229301 |
| PGMDWBTVIQYXDF  | CCOC1=CC=C(C=C1)S(=O)(=O)NC2=CC(=CC=C2)C(=O)NCC(N(C)C  | 0.249186 |
| PGPBUCYUXBJKLD  | CN(C1CCN(C)CC1)C2=C(N=C(O2)C3=C(Cl)C=CC=C3)S(=O)(=O)C4 | 0.258725 |
| PHBUHYXWJRLCBG  | COC1=CC(CNCC2=C3C=CC=CC3=C(OC)C=C2)=CC(OC)=C1OC        | 0.233489 |
| PHTZFBVQTCNNBO  | C1CCN(CC1)C2=C3NC4=CC=CC=C4C3=NC=N2                    | 0.239697 |
| PIEMAKWMQOKSEB  | CN1CCN(CC1)C2=C/C=C\C=C\2NC(=O)C3=C/C=C(O\3)/C4=C/C=   | 0.340409 |
| PIUWHSYGOKWZOL  | CC(C)C1=CC(OCCOCCN2CCCC2)=C(C)C=C1                     | 0.223059 |
| PJELQLUIVZHAI   | CC1=NOC(=C1)C2=CC(=C(C)C=C2)S(=O)(=O)NCCCNC3CCN(CC3)C  | 0.226087 |
| PJSGJCDZKKZHRB  | COC1=C(C)C=C(CN2CCC(CC2)N3N=CC=C3NC(=O)CCOC4=CC=C(     | 0.231103 |
| PKAIJGXARQUEAV  | BrC1=CC=C(CC(=O)NC2CCN(CC3=CC=CC=C3)CC2)C=C1           | 0.245856 |
| PKAQMEXZOQVWHP  | CC1=CC=C(C=C1)C2=NN(C=C2\C=N\O)C3=CC=CC=C3             | 0.272725 |
| PKCMIINJWNKUKY  | ClC1=C(C=CC=C1)C2=NC(=C(NCCCNC3CCOCC3)O2)S(=O)(=O)C4=  | 0.260183 |
| PKPWGSRONAQDSI  | C\C=C1\SC(=NC1=O)N2CCCC2)C3=CC=C(Br)C=C3               | 0.228618 |
| PKTJMZWZUHORSIX | CC1=C(C=CC=C1)N2CCN(CC3=CC4=C(OCO4)C=C3)CC2            | 0.230326 |
| PKTVGZCDARFICO  | COC1=CC=CC=C1NC(=O)CN2CCN(CC2)C3C4=CC=CC=C4C5=CC=      | 0.229744 |
| PKUUIPIUCXLTDX  | CC(NC1=N/C=N\C2=C1\C=C/S2)C3=C/C=C\C=C\3               | 0.395613 |
| PLKWIFSIXRUXPJ  | COC1=C(C=C(CSC(N)=N)C=C1)[N+][[O-]]=O                  | 0.240144 |
| PLNWQIRHGIFOMO  | CC1=CC(C)=C(OCCNCC2=CC=CC=C2)C(C)=C1                   | 0.224857 |

|                 |                                                          |          |
|-----------------|----------------------------------------------------------|----------|
| PLQJFNMUCXTPKU  | CSC1=CC(=NC(=C1)C2=CC=NC=C2)C3=CC=C(Cl)C=C3              | 0.237375 |
| PLXIPEBXLVKFAJ  | ClC1=CC2=C(C=C1)C(=CC=N2)N3CCN(CC3)S(=O)(=O)C4=CC(Br)=   | 0.222526 |
| PMAPOQYCXJXXVRO | COC1=C(OC)C=C(C=C1)\C=N\NC(=O)N\N=C\C2=CC(OC)=C(OC)C     | 0.255079 |
| PMJFTDJHOQAWCY  | CNCC1=C2C=CC=CC2=CC=C1OCC3=CC=CC=C3                      | 0.328232 |
| PMKGRFSNNPPKJU  | ClC1=CC=C(C=C1)C(=O)C2CCN(CC2)CC(=O)NC3=CC=C4OCCOC4      | 0.22271  |
| PMSTUHXQPKTZSE  | CN(C1CCCC1)C(=O)C2=CC=C(C=C2)C3=CC=CC=C3                 | 0.231331 |
| PMYJRLDFFZDOBQ  | COC1=C(OC(C)C)C(Cl)=CC(=C1)C(=O)NCC(N(C)C)C2=CC=CS2      | 0.222704 |
| PNDZMKGAZPUNES  | COC1=CC=C(CC2=NOC(=N2)C3=CC=C(OC)C(=C3)OC)C=C1OC         | 0.223703 |
| PNEFFBLLDPIINJ  | CN(C)CCN(C(=O)C1=COCCO1)C2=NC3=C(S2)C=C(Cl)C=C3          | 0.244315 |
| PNKRIBLRABUUOP  | CSC1=CC=C(CNC2=C3C=CC=CC3=CC=C2)C=C1                     | 0.229768 |
| PNSVMQCTQNBWKW  | SC(NCC1=CC2=C(OCO2)C=C1)=NC3CCN(CC4=CC=CC=C4)CC3         | 0.252833 |
| PNTYXZGREWTUFY  | OC2(CSC1=CC=C(F)C=C1)CCN(CC2)S(=O)(=O)C3=CC=CC=C3        | 0.226009 |
| PNUKEUIHMNPWLA  | CC1=[N+]2C=C(C3=CC=CC=C3)C(=CC2=CC=C1)C4=CC=CC=C4        | 0.230616 |
| PNWANAPQVIFWRQ  | OC1=CC=C(C[C@H]2CNCCN2CC3(CC3)C4=CC=CC=C4)C=C1           | 0.227271 |
| POCINPNNLOIUJL  | CC1=CC=C(C[N]2N=NN=C2CN3CCC(CC3)[N]4N=NC5=CC(=CC=C       | 0.226796 |
| PODKYEDAHNPAGP  | CC1=CC(OCCNCC2=CC=CC=C2)=C(C)C(C)=C1                     | 0.28459  |
| POIOHLGVMZIVHW  | CN1CC2=C(N=CC=C2)N(C)CC3=C1C=CC(Cl)=C3                   | 0.277562 |
| PPHZEVLBHZMQJA  | CN1C(=O)\C(SC2=C/C=C\C=C1\2)C(=O)NCC3CCCO3)=C\C4=C\      | 0.291042 |
| PPLAOTVRDZHLS   | C\C(C1=CC=CC=C1)=N/OCO\N=C(/C)C2=CC=CC=C2                | 0.225625 |
| PPSGNRXSOMBVDX  | CC(C)NCCCCOC1=CC(Br)=CC=C1                               | 0.254965 |
| PPSVWVPMRLUHQD  | CC1=CC=C(CN2CCN(CC2)\N=C\C3=CC(=C(Cl)C=C3)[N+][([O-])=O) | 0.29611  |
| PPVBXIWNUGYMPA  | CC1=CC2=C(C=C1)N=C(C=C2C3=CC=CC=C3)C4=CC=NC=C4           | 0.232688 |
| PPXSQWLNQKTBHD  | ClC1=CC=C(C=C1)C2=NOC(CCCC(=O)NC3CCCC3)=N2               | 0.227032 |
| PPYHEDHGZOLTTA  | CN(C)S(=O)(=O)C1=C(C)C=CC(=C1)N=C(S)NC2CCCC2             | 0.229823 |
| PQCZYLWTHDSHDF  | COC1=CC=CC2=C1N=C(S2)N(C)C3=CC=CC=C3                     | 0.252448 |
| PQJZMXBWFCAZTB  | CC1=NC2=C(C=CC=C2)N1CCOC3=CC=C(C)C=C3                    | 0.249398 |
| PQWNLDPZLWCBA   | CSC1=CC(=CC=C1)N=C(S)N(CCCN2CCCC2)CC3=CC=CS3             | 0.315062 |
| PRHAGQIVBZRUBO  | CCOC(=O)C2(CCOC1=CC=CC=C1)CCN(CC3=CC=CS3)CC2             | 0.23111  |
| PRJOGZWQBKIJAU  | CC(=O)NC1=CC=C(NC(=O)C(=O)NCC(N2CCC3=C(C2)C=CC=C3)C4     | 0.224054 |
| PRLFTRPRRKDIAZ  | COC1=CC=C(C=C1)C(\C)=N\NC2=NC(=CC(C)=N2)C3=CC=CC=C3      | 0.252854 |
| PRSDSEXRDGXJPO  | CCOC(=O)C1=CN=C(N=C1NC2=CC=C(C=C2)N(C)C)[N]3N=C(C)C=     | 0.22863  |
| PRSZSMVFSUELRT  | CNC1=C(\C=N\N=C(N)S)N=CC=C1                              | 0.285562 |
| PSGHMUSVWHDVRN  | BrC1=CC=C(C=C1)N2N=CC3=C(C=CC=C3)C2=O                    | 0.228571 |
| PSUWUZOXZUGHPC  | CC1CC(C)CN(CCCNC(=O)C2=CSC3=C2CCCC3)C1                   | 0.245284 |
| PSVJMIZHURBTDI  | BrC1=CC2=C(OC3=C(N=C2)C(=NC=N3)N4CCCC4)C=C1              | 0.243105 |
| PTHSETRJGDLJGD  | CC1=CC(=CC=C1)C2=NC(=C(C)O2)CN3CCCC(C3)C(=O)NC4CCCC      | 0.233857 |
| PTJJHGMNKVNER   | CCNC1=NC(=NC(SCC2=CC=CC=C2)=N1)N3CCOCC3                  | 0.240423 |
| PTLMVVWYWFMSMLQ | CC1CC(C)CN(CCCOC2=C(C=CC=C2)[N+][([O-])=O)C1             | 0.260801 |
| PTOHLKZGNYWIPW  | COC1=CC=C(\C=C\CN2CCC(CO)(CC3=C(Cl)C=CC=C3)CC2)C=C1      | 0.231944 |
| PUVXHJNHJICBBO  | CN1C(=N)N(CC(=O)C2=CC=C(Br)C=C2)C3=C1C=CC=C3             | 0.266849 |
| PUVZZTMYSZJISL  | COC1=CC2=C(C=C1)N(CCN(C)C)C3=C(S2)C=CC=C3                | 0.275927 |
| PVTUMZHWOKQGQX  | ClC1=C(C=CC=C1)C(=O)N\N=C\C2=CN(N=C2C3=CC=CC=C3)C4=      | 0.226089 |
| PWCMZCSGGQBFY   | CCOC(=O)C2(CCOC1=CC=CC=C1)CCN(CC3=CC=CN3C4=CN=CC=        | 0.264133 |
| PWCZINXPDHUFKO  | CN1CCC(CC1)NC(=O)CCCOC2=CC=C(Cl)C=C2C                    | 0.227755 |
| PWSLNADMFIPISL  | COC1=C(Cl)C=C(NC(=O)COC2=C(C=CC=C2)C(=O)NCC(N(C)C)C3=    | 0.280091 |
| PXDJSUVMLSUBMG  | [O-][N+](=O)C1=C(C=C(C=C1)N2CCCC2)N3CCCC3                | 0.227272 |
| PXIYBXVBWJIZLO  | CC(C)CN(CC(C)C)CC(O)CN(C1=CC=CC=C1)S(=O)(=O)C2=C(C=CC=   | 0.256406 |
| PXJLCUCNAHNABV  | CC1=C(C)C(NC(=O)C2=CC=C(CN3CCC4=C(C3)C=CC=C4)C=C2)=C     | 0.264344 |

|                 |                                                        |          |
|-----------------|--------------------------------------------------------|----------|
| PXOMUSMGYFLSLS  | CCCCC1=CC=C(NC2=NCCCS2)C=C1                            | 0.268447 |
| PXTKIYADTRPNT   | O=C(CCN1C(=O)OC2=CC=CC=C12)N3CCN(CC3)C(C4=CC=CC=C4     | 0.237748 |
| PYLSWXYTNI MYDR | CN1C2CCC1CC(C2)N(CCC3=CC=CC=C3)C(=O)C4=CC(C)=CC(C)=C   | 0.224263 |
| PYTRMEMFWBKJEC  | CN(CC1=C(O)C=CC(C)=C1)CC2=C(O)C=CC(C)=C2               | 0.272894 |
| PZDKFVOFPGYELB  | COC1=CC2=C(C=C1)C=C(C=C2)C(=O)NCC3=C(CN4CCCC4)C=CC=    | 0.261033 |
| PZMVHWBTAAZMTQ  | COC1=C(C=CC=C1)N2CCN(CCNC(=O)NC3=C(C)C(C)=CC=C3)CC2    | 0.255786 |
| PZXFYCXNAXKKKR  | CN1C(NN=O)=NC2=C1C=CC=C2                               | 0.229482 |
| QAGYGLBDCVOGB   | CC1=NN(C(CI)=C1\C=N\NC2=NC3=C(S2)C=CC=C3)C4=C(CI)C=C   | 0.239183 |
| QANPJOOBDBRKDL  | COC1=C(O)C(Br)=CC(CN2CCN(CC2)C3=C(C)C(C)=CC=C3)=C1     | 0.226082 |
| QAPZAHBJVOOYBD  | CN1CCN(CCOCCOC2=C(CI)C=C(Br)C=C2)CC1                   | 0.256438 |
| QAZDTBLCRVKABV  | COC1=C(CI)C=C(C=C1)N=C(S)N(CCN(C)C)C(C)C2=CC=CO2       | 0.244801 |
| QBORKFJAKFLCW   | CC1=NC2=C(C=CC=C2)N1CC3=C(Br)C=CC=C3                   | 0.263688 |
| QBWFMAFOUIMMOD  | CN1CCN(CC1)C(=O)C2=CC=C(O2)C3=CC=C(Br)C=C3             | 0.234924 |
| QBXWXWIHOCXUHG  | BrC1=CC(\C=C\C(=O)NC2CCN(CC3=CC=CC=C3)CC2)=CC=C1       | 0.222572 |
| QCCDASOPVJFNAY  | CC1=CC(C)=C(C(C)=C1)S(=O)(=O)OC2=C(C=CC=C2)[N+][O-]=O  | 0.254152 |
| QCKHVNJOGWFAMO  | [O-][N+](=O)C1=CC(OCCCN2CCC(CC3=CC=CC=C3)CC2)=CC=C1    | 0.265287 |
| QCLYSNBFAOOKB   | ClCCN(CCCl)C1=CC=C(\C=N\C2=CN=C(S2)C#N)C=C1            | 0.242627 |
| QCPYMEACPSNFNB  | ClC1=CC2=C(C=C1)N=CC(C3=NN=NN3C4=CC=CC=C4)=C2C5=C      | 0.257747 |
| QDUKGM PARKWDLS | CN(C)C1=CC=C(C=C1)C(=O)N2CCN(CC2)C3=C4C=CC=CC4=NC(=    | 0.24316  |
| QDUMNIXEJNBCJ   | CCC1=C2CSC(C)(C)CC2=C(C#N)C(=N1)N3CCNCC3               | 0.236271 |
| QDWRYKRMAKJIGF  | BrC1=CC=C(C=C1)S(=O)(=O)N2CCCC(C2)C(=O)N3CCN(CC4=CC=   | 0.241997 |
| QDZYWFQEOAHJRB  | CC1=CC(=CC(C)=C1)N=C(S)NCCSC2=CC=C(CI)C=C2             | 0.238286 |
| QEPDEESHPAOVON  | CCOC(=O)C2(CC1CC1)CCN(CC3=CN(C)C4=C3C=CC=C4)CC2        | 0.265582 |
| QETWCIZJGMNCR   | FC1=CC=C(NC2=NC(=NC(=N2)N3CCOCC3)N4CCOCC4)C=C1         | 0.269651 |
| QEUVQEMDXMIDPV  | CNCCCOC1=C(OC)C=C(C=C1)\C=C\C                          | 0.233073 |
| QEYKVSJFGFOGHF  | COC1=C(OC)C=C2CN(CCC(C)C3=CC=C(CI)C=C3)CCC2=C1         | 0.30947  |
| QFBNXUJMKJRPCR  | COC1=C/C=C(\C=C\1)N2\N=C3/C(=C2/C)/C(C)=N\N=C\3N4CCC   | 0.310009 |
| QFVKPTZTSNICRC  | COC1=CC=C(CI)C2=C1N=C(S2)N(CCN(C)C)C(=O)C3=CC4=C(OCC   | 0.248867 |
| QGDPUOFWKLLFOFY | ClC1=CC(NC(=O)NC2CCN(C2)C3CCCCC3)=CC=C1                | 0.247944 |
| QGNJGCSZPBNCIE  | BrC1=C(CN2CCC(CC3=CC=CC=C3)CC2)C=CC=C1                 | 0.249672 |
| QGSFDXOMOOGDSK  | C1CN(CCN1C2=CC=CC=C2)C3=NC4=C(C=CC=C4)N=C3             | 0.228385 |
| QGZRBSNMXGCSFE  | CC1=NC=C(CCN2=CC3=C(C=CC=C3)C=C2)C=C1                  | 0.248293 |
| QHBDYLBWYSEIIL  | CCC1=CC=C(C=C1)N=C(S)NC2CC3CCC(C2)N3CC4=CC=CO4         | 0.283643 |
| QHIVLRLOQJFRMW  | ClC1=CC=C(OCC2=CC=C(C=C2)C(=O)NCC(N3CCCCC3)C4=CC=C     | 0.239362 |
| QHSODUVKFCSEIW  | NC(CCS(=O)(=O)C1=CC=C(CI)C=C1)=NOC(=O)C2=C(C=CC=C2)C(F | 0.226734 |
| QHZVNNJHHNXPY   | S=C1SCN(CC2=CC=CO2)CN1CC3=CC=CO3                       | 0.233732 |
| QITKCQWRUKVTKJ  | NC(N)=N\N=C\C1=CC(CI)=C(CI)C=C1                        | 0.267985 |
| QITXFIQUENDJAS  | COC1=C(C=CC=C1)C(N2CCN(CC2)C3=CC=CC=C3)C4=NN=NN4C      | 0.256416 |
| QJECGTSVNHFPFB  | CN(CC(=O)NC1=C(C)C=CC=C1C)C(=O)C2=CC(=CC=C2)S(=O)(=O)N | 0.222649 |
| QJXHHRVPXGGQDG  | C(CN1CCN(CC1)C(C2=CC=CC=C2)C3=CC=CC=C3)OC4=CC=CC=C     | 0.282191 |
| QJZHQABIAZLOIL  | CCN1CCC2=C(C#N)C(=NC(=C2C1)N3CCOCC3)N4CCCCC4           | 0.228215 |
| QKBMJXWTFKVSCO  | CCOC1=CC=C(C=C1)C2=CC(CCCC(=O)NC3=C(OC)C=CC(OC)=C3)-   | 0.229848 |
| QKCWWARXJOJFKM  | COC1=CC=C(NS(=O)(=O)C2=C3C=CC=CC3=CC=C2)C=C1           | 0.229362 |
| QKGONMGEFYJKEZ  | CN1CCN(CC1)C2=NC(=CC(=N2)C3=CC=CS3)C(F)(F)F            | 0.239952 |
| QKYKQQMTTWZNNG  | CN1C=C(CN2CCCC(C2)C(=O)C3=CC=C(C=C3)C4=CC=CC=C4)C(C    | 0.256473 |
| QLIPLXZIEDFREV  | CC(=O)N1CCN(CC(=O)NC2=C(SC3=CC=CC=C3)C=CC=C2)CC1       | 0.237003 |
| QLPICJMQRAXDA   | CCN(CC1=CC=CC=C1)C(C2=CC=CS2)C3=NN=NN3C4CCCCC4         | 0.234776 |
| QLYRCNUDUMNWH   | FC1=CC=C(CN2N=NN=C2C(N3CCCCC3)C4=CC=CS4)C=C1           | 0.244468 |

|                 |                                                         |          |
|-----------------|---------------------------------------------------------|----------|
| QMOMYIRVYSPAKB  | CCOC(=O)C2(CC1CCCCO1)CCN(CC3=C(F)C=C(OC)C=C3)CC2        | 0.232468 |
| QMSBNHQGBWJGQW  | CC1=NN(C=C1)C(=O)NCCCN2CCN(CC2)C3=C(C)C=CC(Cl)=C3)C     | 0.225584 |
| QNEQAAAVYIGQLU  | CC1CCN(CC1)C2=CC(=NC(=N2)[N]3N=C(C)C=C3C)C              | 0.223019 |
| QNLXJYQUWCNYBH  | OC1(CCNCC1)C2=CC=C(Br)C=C2                              | 0.254874 |
| QNWITCFETJUORD  | COC1=CC(NC2=C(C=NC=C2[N+][[O-]]=O)[N+][[O-]]=O)=CC=C1   | 0.245412 |
| QNYXZWCJSLPQKO  | COC1=CC(OC)=C(NC(=O)C2=C3C=CC=CC3=NC(=C2)C4=CC(OC)=     | 0.25241  |
| QNZUKQBTSDHTBA  | ClC1=CC=C(CN/2\C=C/C(=N)/C=C2)C=C1Cl                    | 0.243338 |
| QOKAIPLCDPHDIW  | CC(C)C1=CC=C(C)C=C1OCC(=O)NC2=CC=CC=C2N3CCN(C)CC3       | 0.253497 |
| QOTBRBTZSQDUQQ  | COC1=CC=C(C=C1OC)C2=NOC(=N2)CN(C)[S+][[O-]](=O)C3=CC=C  | 0.232522 |
| QPDWOBVCJVJMBU  | CNC1=NC(C)=CC(C)=C1S(=O)(=O)C2=CC=C(C)C=C2              | 0.231738 |
| QPFMMJLXNBJTPA  | COC1=CC(OC)=C(C=C1)C(=O)O\N=C(/N)C2=CC=CC=C2            | 0.260934 |
| QPKQHAOORMNUQW  | CSC1=C(OCC2=CC(=NO2)C(=O)N3CCN(C)C(C3)C4=CC=CC=C4)C     | 0.230589 |
| QQIUJXHQZFWLHK  | CC(C)CC1=CC=C(C=C1)C(C)C(N)=NC2=CC=C(O)C=C2             | 0.278475 |
| QQWPAAYLSWYFAO  | CC(C)C1=C(C=CC=C1)\N=C(/S)NC2CCN(CC3=CC=CC=C3)CC2       | 0.275865 |
| QRCNADYEMNSBRW  | CN(CC(=O)NC1=CC=C(Cl)C=C1)CC(=O)NC2=CC(=CC=C2C#N)Cl     | 0.230312 |
| QRHJAHSNXTXASJS | ClCCN(CCCl)C1=CC=C(\C=N\NC2=NC=CC=N2)C=C1               | 0.258981 |
| QRKFYUKUGTZALL  | [O-][N+](=O)C1=C(Cl)C=CC(=C1)S(=O)(=O)NCCCN2CCOCC2      | 0.222454 |
| QRKLUICYAXZGJB  | FC1=C(C=CC=C1)N2CCN(CC2)C3=NC=NC4=NNC=C34               | 0.239918 |
| QRPGGRCHUPLCMK  | ClCCN(CCCl)C1=CC=C(C=C1)N2C=NC3=C2N=CN=C3Cl             | 0.23471  |
| QRVMQIUAEISBOS  | COC1=CC=C(C=C1)N2CCN(CC3=NC(NC4=CC(Cl)=C(C)C=C4)=NC     | 0.222594 |
| QRWBTPGKKOIKO   | COC1=C(OC)C(CN(C)CC(=O)NC2=C(C=CC=C2)C(=O)NC3=CC=CC=    | 0.266088 |
| QSARQDDLCZSVDS  | COC1=C(OCC(O)CN2C(=N)N(CC3=CC=CC=C3)C4=C2C=CC=C4)C      | 0.23538  |
| QTCAKMPBKAQAHZ  | COC1=CC(NS(=O)(=O)C2=C(C)C(C)=C(OC)C=C2)=C(OC)C=C1Cl    | 0.228304 |
| QTDWKLWXZCNFZ   | CC1=CC(=C(O)C(CN2CCN(CCC#N)CC2)=C1)C3(C)CCCC3           | 0.225332 |
| QTHXJXNQUMVBAG  | CCCN(CC(=O)NC(=O)NC1CCCC1)CC(=O)NC2=C(Cl)C=CC(Cl)=C2    | 0.232627 |
| QTKRXJOKZCYAGZ  | N\C(S)=N/N=C/C1=C(OCC2=CC=CC=C2)C=CC=C1                 | 0.225929 |
| QTRQJBWCSNJCAU  | CC1CCC\C(C1)=N\NC2=NC3=C(C=CC=C3)C=C2                   | 0.223792 |
| QTUKEQREUWREAO  | FC1=C(NC2=NN=C(CS2)C3=CC=CC=C3)C=CC=C1                  | 0.228594 |
| QUDDHHSLEAGDEC  | CC1=C(NC(NCCCN2CC2)=NC3=C(C)C=CC=C3)C=CC=C1             | 0.344403 |
| QUMWLIWTPWCOOQ  | SC(NCCN1CCOCC1)=NC2=CC=CC(=C2)S(=O)(=O)NC3=CC=C(Br)C    | 0.235447 |
| QURJSJMDOQGACP  | CCOC1=CC=C2N=C(O)C(=CC2=C1)CN(CC3=CC=CS3)CC4=NN=N       | 0.24063  |
| QUZTWGZXAYXRIU  | N\C(CC1=CC=C(C=C1)[N+][[O-]]=O)=N/OC(=O)C2=C(Br)C=CC=C2 | 0.225117 |
| QVMYGMWIMBAYRRL | CN(C)CCOC(C1CCCC1)C2=C(C)C=CC=C2                        | 0.297695 |
| QVVQWIYNZZPAJX  | C[N+][[O-]]=CC1=CC(OCCN2CCN(CC2)C3=C(Cl)C=C(C=N3)C(F)(F | 0.233362 |
| QWBIZNDBLRAIKV  | CC1(C)CC2CC(C)(CN2C3=NC=NC4=CC=CC=C34)C1                | 0.228189 |
| QWLZUXANZYJJ    | CC1CC(C)CN(CC(=O)NC(C2=CC=CC=C2)C3=CC=CC=C3)C1          | 0.228138 |
| QXFGNIAWGPBCAC  | CN(CC(O)COC1=CC2=C(C=CC=C2)C=C1)CC3=CC=C(C)C=C3         | 0.252483 |
| QXJSNVAFIUZCMX  | ClC1=CC=CC=C1N2CCN(CC2)C(=O)CCN3C(=O)OC4=CC=CC=C34      | 0.226868 |
| QXOSABCPDHNIAL  | CC1=CC=C(C=C1)C2=NC(=NO2)C3=CC=CC=C3                    | 0.23376  |
| QXUGQXHZIXSGKU  | CS(=O)(=O)C1=C(C#N)C(=CC(=N1)C2=CC=C(Br)C=C2)C3=CC=CC=  | 0.239663 |
| QYAFVXAGTSETMW  | COC1=CC(CC=C)=C(OCCN(C)CC2=CC=CC=C2)C=C1                | 0.243584 |
| QYPSFPTUCHKUAX  | CCN(CC1=CC=CC=C1)C2=CC=C(\C=N\N=C(/S)NCC=C)C=C2         | 0.222488 |
| QYRFUAMRNAKEET  | N(\N=C\C1=CN=CC=C1)C2=NC(=CC(=N2)C3=CC=CC=C3)C4=CC=     | 0.225894 |
| QYRGRUQZJHZIFZ  | CC1=C(\C=N\N=C(/N)C2=NC=CN=C2)C=CC(=C1)N(CCCl)CCl       | 0.253997 |
| QYSUKZQLGIRKGW  | CC(C)C1=C(OCCN2CCC3=C(C2)C=CC=C3)C=C(C)C=C1             | 0.229653 |
| QZFRAGYQZYNTFT  | ClC1=CN=C(NC(=O)NCC2CCCC(CNC(=O)NC3=NC=C(Cl)C=C3)C2     | 0.260945 |
| RAAMDBRJYZVAQD  | CN1C(CCN2CCN(C)CC2)=NC3 InterBioScreen,STOCK5S-49612    | 0.241497 |
| RAERZXDPSRTSKL  | COC(=O)C1=CN(CC2=CC=C(OC Chem Div, K813-0031, NSC-261   | 0.229548 |

|                |                                                         |          |
|----------------|---------------------------------------------------------|----------|
| RAESDTULQDNSBP | FC1=C(C=CC=C1)N2CCN(CC2)C(CNC(=O)COC3=CC=CC=C3)C4=C     | 0.25055  |
| RAOGOTKLNJUKFF | CCN(CC)CCCNC(=O)C1=NOC(=C1)C2=CC=CC(=C2)Cl              | 0.286737 |
| RBIMEIXDDYSEGP | CSC1=CC=C(CN2CCN(CC2)C(=O)C3=CC=C(C=C3)[N+](=[O-])=O)C= | 0.227878 |
| RCBSDKHPNVVQHC | NN1C(CC2=C3C=CC=CC3=CC=C2)=NN=C1SCCOC4=CC=C(F)C=C       | 0.243612 |
| RCCWZWLILTAEV  | FC(F)(F)C1=CC(CN2CCSCC2)=CC=C1                          | 0.230851 |
| RCPSBCNJFQYDLM | CC(C)C1=C(OCCCN2CCC3=C(C2)C=CC=C3)C=C(C)C=C1            | 0.222405 |
| RCXPUJWOBYOJJW | NC(N)=N\N=C\C1=CN(N=C1C2=CC=CS2)C3=CC=CC=C3             | 0.232438 |
| RDBGRPXIQRPBJ  | CC(C)(C)NCC(O)(C1=CC=C(Cl)C=C1)C2=CC=C(Cl)C=C2          | 0.261453 |
| RDHDTXRBAUHQAD | CN(CC1=CN(C)N=C1C2=CC(Cl)=CC=C2)CC3=C(C)C=NC=C3         | 0.26704  |
| RDMDBLYGUNAKBH | ClCCN(CCCl)C1=CC=C(C=C1)C2=NCCC3=C2C=CC=C3              | 0.230053 |
| REHRLWIZZMGLP  | CN(C)C1=CC=C(C=C1)\N=N\C2=C(C=CC=C2)C(=O)OCC(=O)N(C)C   | 0.235514 |
| REIKLHYZOGQSRQ | CN(C)CCNC(=O)C1=CC=CC2=C1N=C(N2)C3=CC=NC=C3             | 0.240144 |
| RENAWGQIHCWXQF | FC1=CC=C(NC(=O)NC2=C(F)C=CC=C2)C=C1                     | 0.231077 |
| REVHAZQWZXMKQE | FC1=CC2=C(C=C1)C(CC3=C(S2)C=CC(Cl)=C3)N4CCN(CCC5OCCC    | 0.29474  |
| RGBGXPAVLXGXON | ClC1=CC(Cl)=C(C=C1)C2=NC3=C(C=CC=C3)C(=C2)C(=O)NNC(=O)  | 0.227441 |
| RGDNNHVBAWSEKK | COC1=CC=C(C=C1)C(CNC(=O)C2=CC(Br)=CC=C2)N3CCCC3         | 0.257483 |
| RGFADXLNILIEQ  | CC1=CC=C(\C=N\NC(=O)COC2=C(C=CC=C2)C3=CC=CC=C3)C=C1     | 0.223196 |
| RGIJVFWDHXTTD  | CCOC1=C(O)C(CN(C)CC2CCN(CCC3=CC=C(Cl)C=C3)C2)=CC=C1     | 0.278185 |
| RGMAPPXLXVKJJH | COC1=CC=C(C=C1OC)C(N2CCN(CC2)C3=CC=C(F)C=C3)C4=NN=I     | 0.228113 |
| RGUGPYBGFLDYN  | CCOC(=O)C1=C(C)C=C(NC(=O)NC2=CC=C(Cl)C=C2)S1            | 0.230562 |
| RHGRSYWNRCWBAO | ClC1=C(OC2=CC=C(C=C2)S(=O)(=O)NCCN3CCOCC3)C=CC=C1       | 0.244175 |
| RHMCMTSHSSXER  | FC1=CC=C(C=C1)N2CCN(CC2)C(=O)C3=CC=C(CN4CCC5=C(C4)C     | 0.240688 |
| RHPYTLPXMYNISV | FC1=C(C=CC=C1)C(N2CCN(CC3=CC=CO3)CC2)C4=NN=NN4CC5       | 0.230674 |
| RHTUQQMQAVBSGS | [O-][N+](=O)C1=C(NC(=O)CN2CCCCC2)C=CC(Br)=C1            | 0.225963 |
| RICBSTFZGAJTFJ | FC1=C(\C=N\NC2=C(Cl)C=NC=C2Cl)C(Cl)=CC=C1               | 0.244707 |
| RJHCGCBEVHOGBY | C1=CC=C(C=C1)C=2N=C(ON2)CSC3=NN=C(N3C4=CC=CC=C4)CC      | 0.248889 |
| RJJINACFKMZQI  | ClC1=CC2=C(SC(=N2)C3CCNCC3)C=C1                         | 0.225809 |
| RJQJUPDWOUTAH  | C(CC1=C2C=CC=CC2=CC=C1)N3CCNC[C@@H]3CC4=CC=CC=C4        | 0.282706 |
| RLECCWRYKOQKCK | CCOC1=CC(O)=C(C=C1)C2=NNC(C)=C2OC3=CC=C(OC)C=C3         | 0.227691 |
| RLGJSJOPBCLECE | COC1=C(C=C2C=CC=CC2=C1)C(=O)NC3=NC=CC(C)=C3             | 0.236245 |
| RLHCOHXXAVGTHB | CC(C)N(C1=CC=CC=C1)C2=CC=C(C=C2)N=C(S)NCCN(C)C          | 0.357731 |
| RLHRDPKMXSPON  | CN(C)CCOC1=CC=C(C=C1)C2=C(SC3=C2C=CC=C3)C4=CSC=C4       | 0.291268 |
| RLJPEHJIOJINEG | CN(C)CCOC(C1=CC=C(C)C=C1)C2=CC(=CC=C2)C(F)(F)F          | 0.309864 |
| RMFQIIXCTLNZRC | N(C1=NC(=NS1)C2=CC=CC=C2)C3=CC=CC=C3                    | 0.243947 |
| RMQVNBGPACWTMA | COC1=CC=C(C=C1)C(=O)NNC(S)=NC(=O)C2=CC=C(Cl)C=C2        | 0.239861 |
| ROQMHVNDXNSVSQ | CC(C)C1=C(C=CC=C1)\N=C(/S)NC(C)C2=CC=CC=C2              | 0.228417 |
| ROVVVYHPFBDPLO | CC1=CC=C(C=C1)C2=NOC(CCC(=O)NCCN3CCN(CC4=CC=CC=C4)      | 0.223711 |
| RPACPATUCIVNSK | FC1=CC(=C(F)C=C1)C2=NN=C(NC3=C(F)C=CC=C3)SC2            | 0.251101 |
| RPGZZXUOBIAJNE | CC1=NC2=CC=CC=C2C(=N1)SCCOC3=CC=C(C=C3)OC               | 0.236467 |
| RPKPBLGOGRELES | CN1CCN(CCCN(CC2=CC=CS2)C(\S)=N\C3=CC(C)=C(C)C=C3)CC1    | 0.283744 |
| RPOONTYLVSDHLY | COC1=C(OC)C(OC)=C(\C=N\N2C(SC)=NN=C2C3=CC=CC=C3)C=C     | 0.250711 |
| RQAPLMHASVVSSW | CC1=NC(=CC(N\N=C\C2=CC(F)=CC=C2)=N1)N3CCOCC3            | 0.224611 |
| RQDLEWXZDCLCRS | CCN(CC)CCNC(=O)C1=NN(C2=C1CCC3=C2C=CC(OC)=C3)C4=CC      | 0.256127 |
| RQRCEVNKLAYFPF | CC1CCC\C(C1)=N\NC(=S)NC2: Vitas-M Laboratory,STK083070  | 0.223774 |
| RRMSMKQFFNOZRL | NC(=O)CCN1CCN(CCOC2CC3=C(SC4=C2C=CC=C4)C=CC(Cl)=C3)     | 0.279925 |
| RRUHRQCUOJRTHJ | COC1=CC(=C(OC)C=C1)S(=O)(=O)N2CCN(CC2)C34CC5CC(CC(C5    | 0.222792 |
| RRWNGHNOEYOFFB | C(CN1C(CNC2=CC=CC=C2)=NC3=C1C=CC=C3)OC4=CC=CC=C4        | 0.229584 |
| RRXRGDXVXFYRD  | CC1CCCC(C)N1CC(O)COC2=CC(=CC=C2)C                       | 0.245971 |

|                 |                                                          |          |
|-----------------|----------------------------------------------------------|----------|
| RRZJGAZTGINHFZ  | FC1=CC=C(C=C1)C2=NN(C=C2CNCC3=CC=CC=C3)C4=CC=CC=C4       | 0.228281 |
| RSUNVBITOJEYPG  | CCC1=NC2=C(C3=C(CCCC3)S2)C(=N1)N4CCN(CC4)C(=O)C5=CC=C5   | 0.228761 |
| RSWRBALYBXCPPU  | ClC1=CC=C(SCCOCCN2CCCC2)C=C1                             | 0.282325 |
| RSXFMHFYIPOTDZ  | OC(COC1=CC=C(Br)C=C1)CN2CCC(CC3=CC=CC=C3)CC2             | 0.252966 |
| RTHWJTSKQJWTDG  | COC1=CC=C(CN2CCC(CC2)C(=O)NC3=CC=C(OC4=CN=CC=C4)C=C4     | 0.226617 |
| RTPXMZUKAWAOMU  | O=C(NC1=CC=C(C=C1)N2C=CC=N2)C3CCCCN3CC4=C5N=CC=C5        | 0.226878 |
| RUIVQZQTJIUASI  | CC[N+](CC)(CC#CC1=CC=CC=C1)CC#CC2=CC=CC=C2               | 0.233061 |
| RULBLZKSANQWSB  | COC1=C(SC2=C(OC)C=NC(=N2)C3=NC=CC=C3)C=CC=C1             | 0.244033 |
| RUXJQRMOHFTVDC  | CC1=CC(C)=C(C=C1)N2CCN(CC2)C3=C(C=CC=N3)[N+][O-]=O       | 0.236116 |
| RVBSLUQLFIASQC  | N=C1N2CCCCCCCCCCCC2=NC3=C1C=CC=C3                        | 0.237292 |
| RVCVRTKVCVPKSD  | CCOC1=C(OCC(=O)NC2=C3C=CC=CC3=CC=C2)C=CC(CNCCCN4C        | 0.242143 |
| RVDGYJRNXYZSRV  | CC1=CC=C(S1)C(=O)NC2=C(C=CC(Cl)=C2)N3CCCCC3              | 0.24688  |
| RVGYUVJAABJREK  | CCN1CCN(CC1)C(S)=N\C2=CC3=C(C=C2)N=C(C=C3C)N4CCN(C       | 0.295405 |
| RVLXBSYISIMSQS  | FC1=CC=C(\C=N\NC(S)=NC2=C(Cl)C=C(Cl)C=C2)C=C1            | 0.26197  |
| RVOJEUDQOHLIER  | CN(C)C1=CC=C(C=C1)\C=N\N2CCCCC2                          | 0.277543 |
| RWAJJRZLHXZLNG  | CC(C)C(N1CCC2=C1C=CC=C2)C3=NN=NN3C4CCCCC4                | 0.239932 |
| RWPDRRSKJTUEDJ  | CCN1CCN(CC1)C(C2=NN=NN2C(C)(C)C)C3=CC(OC)=C(OC)C=C3      | 0.227429 |
| RXAQMQYOIAFNIL  | CCN(CC)C1=C(C=NC(=N1)C2=CC=CC=C2)S(=O)(=O)C3=CC=C(C)C    | 0.234048 |
| RXMDCSNWVQQFHW  | CCCCOC1=C(C=C(Br)C=C1)C(\C)=N\NC2=NCCN2                  | 0.230369 |
| RXVVMJTWVLQTIH  | COC1=C(COC2=C(F)C=CC=C2)C=C(C=O)C=C1                     | 0.228502 |
| RXVXNNJBPMJSKS  | CN(C1=C(C)C(=CC=C1C)S(=O)(=O)N2CCN(C)CC2)S(=O)(=O)C3=C(C | 0.236139 |
| RYCATPIUCIAASG  | CCOC1=C(C=CC=C1)\N=C(/S)N(CCCN2CCOCC2)CC3=CN(C)C4=C      | 0.274082 |
| RYDQMWWJIIQZSLQ | COC1=CC=C(CCNC(=NS(=O)(=O)C2=CC=C(Cl)C=C2)C3=CC=CC=C     | 0.228555 |
| RYHDJWCZARFFAF  | CC1=CC2=C(C=C1C)N3CCC\N Vitas-M Laboratory,STK498416     | 0.2618   |
| RYKULGMWGVPEJS  | CCN(CC)CCNC(=O)C1=CC=C(NC(=O)C2=CC=C(COC3=CC=CC=C3)      | 0.222951 |
| RYQIVWHYPCDZML  | ClC1=CC(CN2C[C@@H]3C[C@H](N4CCC[C@@]34C2=O)C5=C          | 0.231101 |
| RZPVJAQOZBEKNJ  | FC1=CC(F)=C(C=C1)N2CN(C3=C2N=C4C=CC=CC4=N3)S(=O)(=O)     | 0.224184 |
| RZUSMBUUTPOWAW  | SC(NCC1=CC=CC=C1)=NC2=C3C=CN=CC3=CC=C2                   | 0.226722 |
| RZWVBSYMPVCZNJ  | CCOC=1N=C(N=C(N1)SCCOC=2C=CC=CC2)N(C)C                   | 0.2247   |
| SAWMOFBFQZCITM  | CC1=NOC(=C1)C2=CC(=C(C)C=C2)S(=O)(=O)NCC3CCN(CC4=CC(F    | 0.239971 |
| SBSKJQAIRJNTGA  | CN1CCN(CC1)C2=C(Cl)C=C(NC(=O)COC3=CC=CC=C3)C=C2          | 0.243868 |
| SBUSMVQQRPYJAD  | CN(C)CCNC(=O)NC12CC3CC(C1)CC(C3)(C2)C4=CC=C(C)C=C4       | 0.280131 |
| SBUXGQJJMZYVEL  | CC1=CC(=CC(C)=C1)C(=O)N(NC(=O)NC2=CC=C(Cl)C=C2)C(C)(C)C  | 0.234594 |
| SBUXWFCQUBSXSX  | COC1=CC=C(OC)C(=C1)C(N2CCN(CC2)C3=CC=CC=C3)C4=NN=N       | 0.228497 |
| SCAPGNQQZIVBLA  | ClC1=C(SC2=C1C=CC=C2)C3=NN=C(O3)SCC#N                    | 0.230897 |
| SCDAIUAKJXSYDU  | CC(C)(CN1CCNCC1)NS(=O)(=O)C2=CC=C(Cl)C=C2                | 0.312271 |
| SCDIWFUXVDYCEM  | CCOC(=O)C2(CCOC1=CC=CC=C1)CCN(CC3=CC4=C(OCCO4)C=C3       | 0.259966 |
| SCPRJXKNFHBUKU  | CN1CN(C)C2=C3C1=CC=CC3=C(C=C2)[N+][O-]=O                 | 0.241958 |
| SDGFSCPELJHBP   | COC1=CC(OC)=C(C=C1)C(=O)C2=CC=C(C=C2)N(C)C               | 0.276096 |
| SDWMHFRLYBCUOT  | CN(C)CCNC(C(=O)NC1=CC(Cl)=CC(Cl)=C1)C2=CC=CC=C2          | 0.265831 |
| SECHNLXDFGYFOW  | CN1CCC2C(C1)C3=C(C=CC(C)=C3)N2\C(S)=N\C4=C(Cl)C=C(Cl)C   | 0.253962 |
| SFSRKURQYUVABX  | ClC1=CC(Cl)=C(CO\N=C\C2=C(N=C3SCCN23)C4=CC=CC=C4)C=C     | 0.24359  |
| SGSVTCJUBQIDLH  | CC1=CC=C(NC(=O)CCN2CCC(CC3=CC=CC=C3)CC2)C=C1             | 0.256123 |
| SGXZHDKUJYHHBK  | CCC(C)(C)[N]1N=NN=C1C(N2CCN(CC2)C3=NC4=CC=CC=C4S3)C      | 0.22694  |
| SHHGHUVUBNVWJE  | CN(C)CC1=C(C)C=C2C=CC3=C(C=CC=C3)C2=C1                   | 0.292332 |
| SHOJTIXYLTWTNM  | CCC1=C(NC(=O)C2=CC=C(CN3CCC4=C(C3)C=CC=C4)C=C2)C(C)=     | 0.225847 |
| SIBQPTPZFXIELI  | CN(CCOC1=C(Br)C=C(C)C=C1C)CC2=CC=CC=C2                   | 0.324147 |
| SIJGYHUCFYARBW  | COC1=C(Br)C=C(CN2CCC3=C(C2)C=CC=C3)C=C1                  | 0.228239 |

|                 |                                                        |          |
|-----------------|--------------------------------------------------------|----------|
| SIXSFDVHDGTUML  | COC1=CC=C(C=C1)N(CC2=CC=CC=C2)S(=O)(=O)C3=CC=C(C)C=C:  | 0.230172 |
| SJIJWGNUPUGTPQ  | CCOC1=C(NC(S)=NC2=C(C)C=CC=N2)C=CC=C1                  | 0.226866 |
| SJKTXCSMIYIWAD  | [O-][N+](=O)C1=C(OCC(=O)NC2=CC=C(C=C2)N3CCN(CC3)C(=O)C | 0.222439 |
| SJMBNLLHJPEHNV  | CC12CNCC(C)(CN(C1)C(C3=CC=CC=C3)C4=CC=CC=C4)C2         | 0.318074 |
| SKFXGBGSVNETSS  | [O-][N+](=O)C1=C(\C=N\NC2=C(CI)N=CC=N2)C=CC=C1         | 0.234284 |
| SKIIMHFNSMYMPI  | COC1=CC=CC(=C1OCCN2CCN(CC2)C3=CC=CC=C3OC)OC            | 0.226412 |
| SKSQMTDHWXDWFS  | COC1=CC(=CC=C1)C2=NN=C(O2)C3=CC4=C(C=CC=C4)C=C3        | 0.257457 |
| SKZOLTHIWBTQAL  | N#CC1=CC=C(C=C1)C(N2CCCCC2)C3=NN=NN3CCC4=CC=CC=(       | 0.237535 |
| SLFDFJFMZDAKGZ  | FC1=CC=C(CN2N=NN=C2CN3CCC4=C(C3)C=CC=C4)C=C1           | 0.279396 |
| SLFYZNIJPKHGX   | COC1=CC=CC(=C1)CN2CCCN(CC2)[S+](O)C3=CC=C(Br)C=(       | 0.239848 |
| SLGDRZFZLVKLF   | CC1=NC=C(CN2CCCC(C2)C(=O)NC3=CC=C(C=C3)C4=CC(F)=CC=(   | 0.269775 |
| SLIGTSUZRAYWEB  | COC1=C(OCC2=C(C)NN=C2C3=C(O)C=C(OCC(C)=C)C=C3)C=CC=C:  | 0.265367 |
| SMDGYUXIZWCCHF  | COC1=CC(=CC(OC)=C1OC)C2C(C)C(C)(OC3=C2C=C4OCOC4=C3)    | 0.233743 |
| SMFDUNBACDAAQN  | CC(C)CCN1CCN(CC1CCO)C2CCN(CC2)C3=C(C)C=C(F)C=C3        | 0.289713 |
| SMLCPCWGRWUNBJ  | C\C(=N/NC1=NC(=CC(C)=N1)C2=CC=CC=C2)C3=CC=C(F)C=C3     | 0.241021 |
| SMMTWFIETYPVPP  | CCCSC1=NN=C(NC(=O)NC2=CC=C(F)C=C2)S1                   | 0.227694 |
| SMNKTCOQJWBYKJ  | COC(=O)C1=CN(CC2=CC=C(OC)C=C2)C=C(C1C3=CSC=C3)C(=O)C   | 0.228406 |
| SNAHHWCKTZHBIF  | COC1=CC(CN2C3=CC=CC=C3N=C2C4=NON=C4N)=CC=C1C           | 0.229971 |
| SNXVQBVEXISXBT  | CC1=C(C)C=C(C=C1)N=C(S)N(CCN2CCCCC2)CC3=CC=CO3         | 0.260038 |
| SOBCWJYTJRLCNZ  | CC1CCC2=C(C1)C=C(S2)C(=O)NC3CCN(CC4=CC=CC=C4)CC3       | 0.229835 |
| SODCEZKWFNCHA   | FC1=C(N=C(N=C1)N2CCN(CC2)C3=CC=CC=C3)N4CCN(CC4)C5=     | 0.233829 |
| SODRUIDWSWLJID  | CC1=CC=C(NC2=NC(CN3CCN(CC3)C4=C(F)C=CC=C4)=NC(N)=N2    | 0.224837 |
| SOHYSAFTNSGPSU  | CC1=C(OCCCCNCCO)C=CC(Br)=C1                            | 0.239562 |
| SOLYWHCJVJWXIT  | CCCCN\1C2=CC(=C(C)C=C2N3CCC/N=C13)C                    | 0.227488 |
| SOPMCVVZQSETBN  | ClC1=CC(NC2=NC(=CS2)C3=CC=NC=C3)=CC=C1                 | 0.264193 |
| SOWKVQZIOZWAFE  | CCC1CCC2=C(C1)C=C(S2)C(=O)NCC(N3CCCC3)C4=CC=C(OC)C=(   | 0.229872 |
| SPDVYPXXDOLSOS  | SC(NC1=CC=CC(CI)=C1)=NC2=C(OC3=CC=CC=C3)C=CC=C2        | 0.222748 |
| SPEODCKLJMQURM  | CC(C)(CO)NCC1=CC(OCC2=CC=C(CI)C=C2)=CC=C1              | 0.270805 |
| SPNMGEIUCZRX    | CN1C2=C(C=CC=C2)[N+](C)=C1C3=CC=CS3                    | 0.228592 |
| SPQJBAUZMNPEHF  | COC(=O)C1=NN(C=C1)C2=CC=C(F)C=C2)C3=CC=CC=C3           | 0.237425 |
| SQJMTMUXLOOMQG  | CCN1CCN(CC1)C2=C(F)C=C(C(=C2)N3CCCC3)[N+](O)=O         | 0.251381 |
| SQNLWISAIKBTCW  | CN(C)CCNC(=O)C1=CC2=C(S1)C3=C(S2)C=CC=C3               | 0.230815 |
| SQOBYFYNVVYZFE  | CCN(CC)CCCNC(=O)CSC1=NC(=C2CCC3=C(C=CC=C3)C2=N1)C(F    | 0.249817 |
| SRABAOQNRRWRGL  | CC1CCN(CCCN(CC2=CC=CO2)C(\S)=N\C3=CC(C)=C(C)C=C3)CC1   | 0.229185 |
| SRBUJRGGRVRZGS  | COC1=C(C=C(C=C1)C(=O)NC(S)=NC2=C(C=CC=C2)N3CCCCC3)[N   | 0.229767 |
| SRGGYFLVHOMED   | COC1=C(C=CC=C1)C(N2CCN(CC3=CC=CC=C3)CC2)C4=NN=NN4      | 0.254717 |
| SROKXKMTKYUSNU  | CCCOC1=CC=C(C=C1)C(O)(CCC)CCN2CCCCC2                   | 0.250776 |
| SRSJAHDVWZQQKC  | CC1CCN(CCCCOC2=CC(Br)=CC=C2)CC1                        | 0.300761 |
| SRUOOXMQYNVKRL  | COC1=C(OCC2=C(C)C=CC=C2)C(Br)=CC(\C=N\N=C(/N)C3=NON=   | 0.223747 |
| SSMQZBSIFHOKN   | COC1=C(OC)C=C(C=C1)C2=CCN=C2C3=C(O)C=C(OCC4=CC=C(F)    | 0.22766  |
| SSOBWXXBISJORZ  | CCOC1=CC=C(CN2CCN(CC3=NC4=C(C=C3)C=C(F)C=C4)CC2CCO     | 0.263558 |
| SSYNOGPIXQTMAK  | CCN(CC)C1=C(N=C2C=CC=CC2=N1)N3N=C(C)C=C3C              | 0.22775  |
| STAITCCRXGTZFI  | CCC=1C(=NC2=CC(=NN2C1N3CCN(CC3)CCOCC)C4=CC(=CC=C4      | 0.240156 |
| STAYAOSZGBKRN   | CN(CCOC1=CC=C(CI)C=C1)C(=O)C2=CC(=CC=C2)S(=O)(=O)N3CC  | 0.233672 |
| STMONZKXTMQUDL  | CN1CCN(CC1)C2=NN=C(C=C2)C3=CC(NC(=O)COC4=CC=CC=C4)     | 0.240116 |
| STSCGJBSYJCJODA | ClC1=CC=C(C=C1)S(=O)(=O)N2CCC(CC2)C(=O)NC3CCN(CC4=CC:  | 0.227713 |
| STWOTKSCFBVDML  | COCCCNCCCOC1=C(Br)C=C(C)C=C1                           | 0.232711 |
| SUBZWAAAYBCLAA  | CCOC1=C(C=C(CSC(N)=N)C=C1)[N+](O)=O                    | 0.225058 |

|                 |                                                             |          |
|-----------------|-------------------------------------------------------------|----------|
| SUEDPLSNXHDQJF  | CC1=NC2=C(C=NN2C(=C1)N3CCOCC3)C4=CC=CC=C4                   | 0.234217 |
| SUFVJHJHUVFGTCI | CCCN1C2=C(C=CC=C2)C3=C1N=C(SCCN4CCOCC4)N=N3                 | 0.230144 |
| SUIUMUSHEQVQDC  | CSC1=CC=C(C=C1)CN2CCN(CC2)CC3=CC=CC=C3Cl                    | 0.230586 |
| SUSCYIMTNZLQLZ  | OC(COC1=CC=C(OCC(O)CN2CCN(CC3=CC=CC=C3)CC2)C=C1)CN          | 0.291084 |
| SVLPCMOIRWXVAU  | [O-][N+](=O)C1=CC(=C(NCC2CCS(=O)(=O)C2)C(=C1)[N+](=[O-])=O) | 0.250459 |
| SVSODTYOBUHQ    | C1CCC(C1)NC2=NN=C(NC3CCCC3)C4=CC=CC=C24                     | 0.246278 |
| SVUZFUZSRNJFGG  | CC1=NC(SC2=C(Cl)C=C(Cl)C=C2)=CC(CS(=O)(=O)C3=CC=CC=C3):     | 0.224671 |
| SVXFWFLYWFSIIF  | COC1=CC(=CC(OC)=C1OC)C2=NN=C3SCC(=NN23)C4=CC=CC=C4          | 0.254294 |
| SWFVWROOFHMFAB  | CN(C)CCOC1=NC(=NC2=C1OC3=CC=CC=C23)C4=CC=CC=C4              | 0.248053 |
| SWMNAVUFFAWFPO  | CC1=C2SC3=C(C=C(C=C3)C(=O)NCCCN4CCOCC4)N=C(C)C2=C(C         | 0.24096  |
| SWXRBPVQQRSUMH  | CC1=NN(C(N2CCCC2)=C1\C=N\NC(S)=NC3=CC=C(F)C=C3)C4=C         | 0.229524 |
| SXAAYAUYDIBLCP  | CC(C)C1=CC=C(OCCCCN2CCCC2)C=C1                              | 0.27658  |
| SXARXBQACQASGW  | COC1=C(OC)C=C(CCN2N=NN=C2C(N3CCN(C)CC3)C4=CC=C(Cl)C         | 0.224473 |
| SXJVGQSBOLALOD  | CC1=CC(N2CCN(CC3CCC=CC3)CC2)=C(C)C=C1                       | 0.26558  |
| SXMCYZLUBNHAQI  | COC1=CC2=C(SC(=C2C3=CC=C(O)C=C3)C4=CC=CC(OC)=C4)C=C         | 0.227515 |
| SXZXL SUWQJLZSZ | CC1=CC=C(CSC(NC2=CC=C(F)C=C2)=C(C#N)C#N)C=C1                | 0.224435 |
| SYHIEICQBFXOKW  | CN(C)C1=CC(=CC=C1)C(=O)N\N=C\C2=C(F)C=CC=C2                 | 0.227903 |
| SYMSQEWZPYSKKR  | CC(C)CC1N(CCCN2C=CC=N2)CCC3=C1NC4=C3C=CC=C4                 | 0.250745 |
| SYQCMWPYFILWCG  | CC1CCN(CC1)CC(O)COC2CCC(CC2)C(C)C(C)C                       | 0.224093 |
| SYSBSGFAVACICZ  | COC1=C(C=C(Cl)C=C1Cl)C(=O)NC2=CC=C(NC(=O)C3=CC=CC=C3)C=     | 0.22248  |
| SYXYVMYQTPAUFA  | C(COC1=C(\C=N\N2C=NN=C2)C=CC=C1)OC3=CC=CC=C3                | 0.232239 |
| TTXFUXPVMCFAY   | O=C(NC1=CC=CC=C1)NC2=CC3=C(SN=N3)C=C2                       | 0.242241 |
| TUPKRMNNUUAPMH  | COC1=CC=C(C=C1)C2=NOC(CCC(=O)NCCCN3CCN(CC3)C4=CC=C          | 0.224992 |
| TUSPGVCIGOGKHY  | OC(=NCCN(CCN=C(O)C1=C(N=CN1)C(O)=NC2=CC=CC=C2)CCN=          | 0.238881 |
| TUSPHNIBXFMXQW  | CCOC(=O)C1=C(N=NN1C2=NC(=NC(OCC)=N2)N3CCCCC3)C4=C           | 0.223789 |
| TVHQVHWADWPAQA  | COC1=CC=C(CNC(C2=CC=CC=C2)C3=CC=C(Cl)C=C3)C=C1              | 0.222592 |
| TVLRFWWJOSJVOK  | COC1=C(NC(=O)NC2=NC(=CS2)C(C)(C)C)C=CC=C1                   | 0.231039 |
| TVTUIXLOHKOCR   | FC1=CC=C(C=C1)C(N2CCN(CC2)C3CCCCC3)C4=NN=NN4CC5=C           | 0.229027 |
| TVXDYAKPKQXHU   | CCOC1=C(OCC2=C3C=CC=CC3=CC=C2)C(Br)=CC(C=NN=C(N)C4:         | 0.253391 |
| TWMMEMILQOBTQO  | COC1=C(C=C(F)C=C1)C(=O)C2CCCN(CC3=CC=CN3C4=NC=CC=C          | 0.26871  |
| TWPSAPBHHKSMAC  | CN1N=C(C(CO)=C1OC2=CC=C(C)C=C2)C3=CC=CC=C3                  | 0.249467 |
| TWUPBEURXSAWHI  | C1CN(CCN1\N=C\C2=CC=NC=C2)C3=CC=CC=C3                       | 0.250533 |
| TWZCZLLZJDKWFN  | C(N1CCC2=C(C1)C3=C(N2)C=CC=C3)C4=CC=CC=C4                   | 0.276059 |
| TXASOBSTKPCXCN  | CCC1=CC=C(C=C1)C2=NC(CN3CCCC(C3)C(=O)NCCC4=CC(OC)=C         | 0.222944 |
| TYDLBYKMMQYLSJ  | ClC1=CC(=CC=C1)C2=CSC(NC3=CN=CC=C3)=N2                      | 0.223337 |
| TYPXMHPYLJAKBQ  | COC1=CC=C(C=C1)C(CNC(=O)C2=CC(=CC=C2)S(=O)(=O)N(CC=C)       | 0.240687 |
| TYBKIMJCGAKGV   | COC1=CC=C(C=C1)N2CCN(CC3=CSC(C)=C3C4=CC=C(C)C=C4)CC         | 0.260633 |
| TYZFXKXKXPDBDS  | COC1=CC2=C(C=C1)C=C(C=C2)C3=NOC=C3                          | 0.226146 |
| TZAMHKUTURYHSL  | CN(C)C1=CC=C(\C=N\N=C(/C)C2=CC=CC=C2)C=C1                   | 0.22863  |
| TZHKRJCKNDDAQ   | CC(C)CC(N1CCN(CC1)C2=CC=CC(=C2)Cl)C3=NN=N[N]3C(C)C          | 0.258861 |
| TZPXEOGKYBYFGZ  | CCN1CCN(CCOC2=C(C)C=C(Br)C=C2)CC1                           | 0.237829 |
| TZQOONHGOXXLRH  | CC(C)C\N=C(/S)NCCC1=CC=CC=C1)C\N=C(/S)NCCC2=CC=CC=C         | 0.237783 |
| TZTGPKPSFAHZFS  | SC(=NC1=CC=CC=C1)N2CCN(C\C=C\C3=CC=CC=C3)CC2                | 0.252838 |
| TZYDMNYEWNWIMB  | COC1=CC=C(C=C1)C2=C(OC)C(OC)=C(OC)C=C2                      | 0.292608 |
| UABBWJCLLKRGRS  | CC(CCC1=CC=CC=C1)NCC2=C3C=CC=CC3=CC=C2                      | 0.224529 |
| UAJVAORBEDZLAX  | COC1=C(OC)C=C(C=C1)C2=NN(C=C2\C=N\N=C(N)N)C3=CC=CC=         | 0.22442  |
| UAOWSVXZZRQDCR  | ClC1=CC(=CC=C1)N2CCN(CC3=CC=C(Br)O3)CC2                     | 0.24388  |
| UARULYQGELQFIJ  | ClC1=CC=C(C=C1)C(=O)NC2=CC(Cl)=C(NC(=O)CN3CCCCC3)C=C        | 0.225005 |

|                 |                                                        |          |
|-----------------|--------------------------------------------------------|----------|
| UAVZHNLWRFYHRJ  | COC1=C(OC)C=C(C=C1)C(=O)ON=C(N)CC2=CC(Cl)=C(Cl)C=C2    | 0.224525 |
| UAZRCPGTJUHM    | COC1=C(CN2CCN(CC2)S(=O)(=O)CC3=CC=CC=C3)C=C(Br)C=C1    | 0.235987 |
| UBADSFILNXXBV   | COC(=O)C1=C(Cl)C=CC(NC(=O)C2=C(C)C(=CC=C2)[N+][O-])=O  | 0.22785  |
| UBDCCMAHHCNWAM  | COCCNCCCOC1=C(Cl)C=C(Br)C=C1                           | 0.238917 |
| UBSIOKKUUBUUDQ  | C(COC1=C2C=CC=CC2=CC=C1)OCCN3CCN(CC4=CC=CC=C4)CC3      | 0.231137 |
| UBWUXHOFFJJAQR  | COC1=C(OC2CCCC2)C(Br)=CC(CNCCC3=CC=CC=C3)=C1           | 0.231905 |
| UCKMAYAEGOOXBZ  | CC1=C(OCC2=CC=C(F)C=C2)C=C3C=CC=CC3=N1                 | 0.22725  |
| UCMPHCIVJPSYNB  | CC1=CC=C(CN(CC2=NC=CC=C2)C(=O)NC3=CC(C)=C(C)C=C3)C=C   | 0.237066 |
| UCTQIAQYQMZDRZ  | CCS(=O)(=O)C1=C(Cl)C(Cl)=C(C=C1)C2=CSC(=N2)C3=CC=CC=C3 | 0.227233 |
| UDANXCXZROPWNT  | CC\N=C(/S)N1CCN(CC1)C2=NC(=CS2)C3=CC=C(F)C=C3          | 0.257535 |
| UDFFTDNEEOMUIJ  | NC(=NOC(=O)C1=CC=CC(Br)=C1)C2=CC=CC=C2                 | 0.229103 |
| UDFMQZYEQSHYMP  | CCOC(=O)C1=CC=C(C=C1)N=C(S)N(CCCN2CCN(CC)CC2)CC3=CC    | 0.307398 |
| UDHRPRPURNIQMQ  | CCNCC1=CC(OCC)=C(OCC2=CC=CC=C2)C(Cl)=C1                | 0.340142 |
| UDUFXXPTEYCARI  | CCOC1=CC=CC=C1N2CCN(CC2)CC3=CC=CC(=C3O)OC              | 0.236764 |
| UELMMVWGHYBUEJB | CN(C)C1=CC=C(CN2CCC(CC2)C(=O)NC(C3=CC=C(F)C=C3)C4=NC   | 0.229652 |
| UERPRDFAJRYSTQ  | CC1=CC(CN2CCC(CNC(=O)NC3=CC(Cl)=C(F)C=C3)CC2)=C(C)C=C  | 0.252388 |
| UFAPJKMCCIXKKB  | COCC1=C(C(C)=NC(NCC2=CC(OC)=C(OC)C(OC)=C2)=C1C#N)[N+]  | 0.223386 |
| UFJPPAGASFRWDR  | CSC1=CC(=CC=C1)N=C(S)N(CCC(C)C)C2CCN(CC2)C(C)C         | 0.320631 |
| UFZQAGRTXJPCDT  | CC1=C(C=CC=C1)C(=O)ON=C(N)CC2=CC=CS2                   | 0.225834 |
| UGFOMFGCDBVENN  | N=C1CC2=C(C=CC=C2)C3=C(C=CC=C3)C1C#N                   | 0.282917 |
| UGWJKFXHNUAPCR  | CCOC1=CC=C(C=C1)S(=O)(=O)N2C(C)CC3=C2C=CC=C3           | 0.23545  |
| UHMGEDKDEHYEM   | FC1=CC=C(CNCCC(CC2=CC=CC=C2)C3=CC=CO3)C=C1             | 0.234256 |
| UHOUTQDPMVNNCK  | CC1=CC=C(C=C1)C(N)=NOC(=O)C2=CC=C(F)C=C2               | 0.230032 |
| UHQIKTAVLMIABA  | CC1=CC=C(C=C1)C2=NN=C(O2)C3=CC=CC=C3                   | 0.222371 |
| UIEWVWYZJIFDVLQ | ClC1=CC=C(OCCN2CCN(CC2)S(=O)(=O)C3=CC=CS3)C=C1         | 0.226347 |
| UIKPUZFLXMCXPJ  | CC1=NN(CC=C)C=C1CN2CCC(CC2)C(=O)NC3=CC(=CC=C3)C4=C     | 0.238199 |
| UIMNDLRADBDQMF  | CC1=C(SC(NC2=CC=CC=C2)=N1)C3=CC=CC=C3                  | 0.226862 |
| UIOJEXKHUHMUQHC | CC(C)C1=CC(CN2CCN(CC2)C3=CC=CC=C3)=C(O)C=C1            | 0.225467 |
| UJCIPDXIDCSKPT  | COC1=C(C)C=C(C=C1)C2N(CC3=CC=CN3C4=NC=CC=N4)CCC5=C     | 0.225151 |
| UJKFQZSNQANFHU  | CC1=CC2=C(C=C1)N=C(C)C=C2NC3=CC=C(C=C3)[N+][O-]=O      | 0.228615 |
| UJMNNEJCRDDBRG  | ClC1=CC=C(OCC(=O)N(C2CN3CCC2CC3)C4=C(Cl)C=CC=C4)C=C    | 0.249973 |
| UKEFQPMJYGFDRU  | C#CCN1C2=C(SC3=C1N=CC=C3)C=CC=C2                       | 0.237102 |
| UKOHEKHUXHXZTA  | CN(C)CCCN(C(=O)C1=CC=CS1)C2=NC(=CS2)C3=CC=CC=C3        | 0.234956 |
| UKRHIDLFLAPLNSM | CC1=C(OC2=C1C=C(Br)C=C2)C(=O)NC3CCN(CC4=CC=CC=C4)C3    | 0.236277 |
| ULFSEZIPIRNWAN  | COC1=CC(CN2CCN(CC2)C(\S)=N\CC3=CC=C(Cl)C=C3)=CC=C1     | 0.244107 |
| ULIXOOTVKPGXGZ  | COC1=CC=C(C=C1)C2=CN3CCSC3=[N+][O-]C4=CC=CC=C4         | 0.285598 |
| UMODPOHVGVSVALO | CC1=CN(N=C1)C2=NC(=CC(=N2)C3=CC=CC=C3)C4=CC=CC=C4      | 0.259397 |
| UMPMUQBARDZLPN  | ClC1=CC=C(CS(=O)CC2=CC=C(O2)C(=O)N3CCN(CC3)C4=CC(Cl)=  | 0.229628 |
| UMQWNKFKRKGDF   | CN1CCN(CC1)C(CNS(=O)(=O)C2=CC=C(C=C2)[N+][O-])=O)C3=C  | 0.248769 |
| UMWGOJZIKKYVDB  | COC1=C(CN2CCC(CC2)C(=O)NC3=CN=C(OC4=CC=CC=C4)C=C3)     | 0.251397 |
| UNFZPHVBNJIVHW  | [O-][N+](=O)C1=C(NCC2=CN=CC=C2)C=C(C=C1)N3CCNCC3       | 0.263107 |
| UNSTZRRKYTHBG   | CN1CCN(CC1)C2=C(F)C=C(C=C2)N3CCCC3[N+][O-]=O           | 0.230546 |
| UOBXJBRVEDGTQK  | CN1C(=O)N(CC2=CC=C(Br)C=C2)C3=C1C=CC=C3                | 0.226894 |
| UOERYGBEQSEUMT  | O=C(C1CCCN(CC2=CC=NC=C2)C1)C3=CC=C(C=C3)C4=CC=CC=C     | 0.240574 |
| UOUCABRMBXRKU   | C=CCOC1=C(CN2CCC(CC3=CC=CC=C3)CC2)C=CC=C1              | 0.28902  |
| UPAABZKHOOUFQ   | CC1CCC(=C(C)C)\C(C1)=N\N=C(N)S                         | 0.250581 |
| UPTXRAZTDIKWML  | CC1=C(C)C=C(C=C1)N=C(NC2=CC=C(Br)C=C2)N3CCOCC3         | 0.277502 |
| UQBBTDSGUQJIBT  | CC1\C(=N/OC2=C(C=CC=C2)[N+][O-])=O)C(C)CN1C            | 0.263871 |

|                 |                                                         |          |
|-----------------|---------------------------------------------------------|----------|
| UQLSPHPMYIIASW  | COC1=C(OS(=O)(=O)C2=CC=CC=C2)C=C(\C=N\NC(=O)C3=CC=CC    | 0.230974 |
| UQLXYFJZJNEABU  | CCN1CCN(CC1)C2=C3C=CC=CC3=C(C=N2)C(=O)NC4=C(Br)C=C(     | 0.234521 |
| URDRIRMZCBLBOX  | CCN(C1=CC=CC=C1)S(=O)(=O)C2=CC(C(=O)NC3CCN(CC4=CC=C(    | 0.262264 |
| URIZHJIIRUNCCY  | CCNC1=NC(=NC(OC)=N1)N2CCC(CC3=CC=CC=C3)CC2              | 0.233164 |
| URQARMKEOXBUIM  | COC1=CC(CN2CCCC(C2)C(=O)C3=C(SC)C=CC=C3)=C(OC)C=C1      | 0.262924 |
| URSNYSFIPOXJAM  | COC1=CC=C(OC2=C3C=CC=CC3=C(C)N=N2)C=C1                  | 0.224013 |
| URTZTFXEBYPGOC  | CN(C)CCSC1C2=C(CSC3=C1C=CC=C3)C=CC=C2                   | 0.319743 |
| USVCHZHSFHTEBE  | CON1C2=C(C=CC(Cl)=C2)N=C1C3=CC=CC=C3                    | 0.223858 |
| USZCTAGGFGBSBS  | CC1=CC=CC(=C1)OCCCN2CCCCC2                              | 0.281326 |
| UTCCOJHKHVSQRA  | COC1=CC(=CC(OC)=C1OC)C(=O)N\N=C(\CC2=NC=CN2)C3=CC=C     | 0.256123 |
| UTHZDDBVRIOCTD  | CC(NC(=O)C1=CC=CO1)C(N2CCN(CC2)C3=CC=CC=C3F)C4=CC=(     | 0.224145 |
| UTJXCXGBYVFOGTA | CC1CCCCN1CCNC(=O)C2=CC3=C(C)N=C4C=CC=CC4=C3O2           | 0.23141  |
| UTLMVRAUAPUKKC  | CC(NCC(O)COC(C1=CC=CC=C1)C2=CC=C(C)C=C2)C3=CC=CC=C3     | 0.228106 |
| UTVLFQJTGRGDDM  | COC1=CC(=CC=C1)C2=NC(=NO2)C3=NC=CC=C3                   | 0.2254   |
| UTVPIKGLRUSJLF  | CC1CCCN(CC2=CC=C(OCC3=CC=CC=C3)C=C2)C1                  | 0.2854   |
| UUAKCBNXSFFFOQ  | NCC1CCN(CC1)C2=C3CCCCC3=C4C=CC=CC4=N2                   | 0.272257 |
| UUAMTSUZPHSPON  | ClC1=CC(NP(=O)(OC2=CC=CC=C2)OC3=CC=CC=C3)=CC=C1         | 0.222487 |
| UUDXRZFRPOKNDK  | CC1=CNC(\N=N\C2=CC=CC=C2)=N1                            | 0.27957  |
| UULGWBFYZWLCQ   | CN(CCOC1=CC=C(Cl)C=C1)CC2=CC(=CC=C2)S(=O)(=O)N(C)C      | 0.299868 |
| UUUARVJLSFKTBK  | COC1=C(OCC(=O)N(CC2=NC(=NO2)C3=CC=CC=C3)C(C)C)C=CC=     | 0.252512 |
| UVRAZDREJLUWDD  | COC1=CC(=CC(OC)=C1OC)C(=O)OC2=C(\C=N\NC(=O)C3=CC(Cl)=   | 0.25152  |
| UWGFPAZMTGWPGY  | OCl(=O)(=O)=O.BrC1=CC=C(C=C1)[N+]2=C(C=C(C=C2)C3=CC=CC= | 0.274806 |
| UWWWKQWDZQPHGT  | CCOC1=CC=C(C=C1)N=C(S)NCCN2CCN(CC3=CC=CC=C3)CC2         | 0.26217  |
| UXAAYSJSLOREOB  | COC1=C2C=CC=CC2=C(C=C1)C3=NC(CN4CCN(CC4)C5=CC(C)=N      | 0.3111   |
| UXRGUAUTVYRKBY  | COC1=CC=C(CN2C(=O)NC3=C2C=CC(=C3)C(=O)NC4=CC=C(C=C4     | 0.224244 |
| UYCURXFNUKLQAE  | CN(C)C(CNC1=NC(C)=NC2=C1C(C)=C(C)S2)C3=CC=CC=C3         | 0.253729 |
| UYLFNXPBGVPRB   | CCOC(CNCC1=C(C)C2=C(NC3=C2C=CC=C3)C(C)=C1)OCC           | 0.235899 |
| UYLNSTPDYDTCZ   | CCN(CC)CCCNC1=NC=C(C=C1)C2=NN=C(O2)C3=CC=C(OCC(C)C)     | 0.231389 |
| UYRGDWPZKLPRE   | CC1=C2N=C(C=C(C(=O)NCCN3CCCC3)C2=CC=C1Cl)C4=NC=CC       | 0.224527 |
| UZQSVAXISNJXMA  | COC1=CC(=CC=C1)C2=C(C3=C(S2)C=C(OC)C(OC)=C3)C4=CC=C(C   | 0.236983 |
| VAEYKRLNDAXEIH  | ClC1=CC=C(\C=N\N2CCN(CC3=C(Cl)C=CC=C3)CC2)C=C1          | 0.269961 |
| VAQAQAYEBXLZSE  | [O-][N+](=O)C1=CC(C(=O)OCC2=CC(Cl)=CC=C2)=C(C=C1)N3CCO  | 0.237614 |
| VBJLFSJKTRLLS   | COC1=CC=C(CC2(CO)CCN(CC3=CC4=C(O3)C=CC=C4)CC2)C=C1      | 0.224892 |
| VBLUFGYBAPIWMI  | CC1CCN(CC1)S(=O)(=O)C2=CC3=C(C=C2)C4=C(C=C(C=C4)S(=O)(  | 0.229549 |
| VBMSCPYQFYJUOP  | CCCCN1C(=N)N(CC(O)COC2=CC=CC=C2)C3=C1C=CC=C3            | 0.226303 |
| VBNDDKRLJXHRTH  | FC1=CC(=CC=C1)C(=O)C2=CC=C(C=C2)N3CCN(CC3)C(=O)C4=CC    | 0.225671 |
| VBQUUEMYGITEBQ  | CC(OC1=CC=C(Br)C=C1)C(=O)NC2CCN(CC3=CC=CC=C3)CC2        | 0.27203  |
| VCBQAQSPQLQFBHJ | COC1=CC=C(C=C1)C(N2CCN(CC2)C3=NC4=C(S3)C=CC=C4)C5=N     | 0.259868 |
| VCFHSOOCBVZOEW  | COC1=CC=C(C=C1)N2C=C(CN3CCCC3)C(=N2)C4=CC(F)=CC=C4      | 0.269208 |
| VCIXBQMJJQHSNKL | NC(CC1=CC=CC=C1)=NOC(=O)C2=C3C=CC=CC3=CC=C2             | 0.224553 |
| VCKPFJMALJNJOS  | CC(=O)NC1=CC=C(CC(=O)NCCC(C2=CC=CC=C2)C3=CC=CC=C3)C     | 0.232554 |
| VCPJOSLAPPPDGI  | BrC1=CC(=CC=C1)C(=O)NC2=CC=C(C=C2)C(=O)OC[C@@H]3CC(     | 0.231481 |
| VCPRSFYZZOYOEQ  | CN(C)CC\C=C1\C2=C(SC3=C1C=C(Cl)C=C3)C=CC(F)=C2          | 0.378891 |
| VDENOZWXPIFATJ  | COCCN(CCOC)C1=C2C=CC=CC2=NC(=N1)C3=CC=C(C)C=C3          | 0.242662 |
| VDNMALJFIDGEGE  | SC(NCCC1=CC=CC=C1)=NC2CC3CCC(C2)N3CC4=CC=CC=C4          | 0.276554 |
| VDONTZRAAXPZEC  | CC1CCCN(CCCCOC2=CC(Br)=CC=C2)C1                         | 0.286989 |
| VESGNTBUUJOFAR  | CC1=C(C=CC=C1)C(OCC(O)CN2CCCCC2CCO)C3=CC=CC=C3          | 0.225969 |
| VEZHCVAZNDLXQA  | C\C(=N/N=C(\S)NCC1=CC=CC=C1)C2=CC(Br)=CC=C2             | 0.240851 |

|                |                                                          |          |
|----------------|----------------------------------------------------------|----------|
| VFCZSWPNOOGGAJ | SC(NC1=C2C=CC=CC2=CC=C1)=NC3=C4C=CC=CC4=CC=C3            | 0.272478 |
| VFFOKZZMLPKPMY | C\N=C(/S)N1N=C(CC1C2=CC=C(CI)C=C2)C3=CC=C(C)C=C3         | 0.228373 |
| VFQQMNPIPMXSQY | CC1=CC(=CC=C1)N=C(S)N\N=C\C2=CC(=C(CI)C=C2)[N+][[O-]]=O  | 0.246745 |
| VGJHJGQIUUCBNW | NC1=C(\C=N\N=C\C2=C(N)C=CC=C2)C=CC=C1                    | 0.239199 |
| VGJLNUWAZCMSLC | CN1CCN(CC1)C2=C(F)C=C(NC(=O)CSC3=C(C)C=C(C)C=C3)C=C2     | 0.229282 |
| VGQNNZAKPVUEGN | CN(C)C1(CCCCC1)C2=NN=N[N]2CCOC(=O)NC3=CC=C(CI)C=C3       | 0.25121  |
| VGWUFXZDHVMWPU | COC1=C(OCC(O)CN2CCC3=C(C2)C=CC=C3)C=CC(CC=C)=C1          | 0.223321 |
| VHCZYBSUTHBEDK | COC1=C(OC)C=C2CN(CCC2=C1)C3=C(CI)C=C(C=C3)[N+][[O-]]=O   | 0.228948 |
| VHLPETZIMDPZJC | CCOC1=CC=C(C=C1)N=C(S)NCCCN2CCN(CC2)C3=CC=C(OC)C=C:      | 0.246732 |
| VHMYRIWZTCFOPT | C[N+]=C(\C=C2/SC3=C(C=CC=C3)N2CCO)C=CC=C1                | 0.227264 |
| VHPBVWQHJKKNCD | CC1=C(OC2=C1C=CC=C2CI)C(=O)NC3CCN(CC4=CC=CC=C4)C3        | 0.22587  |
| VHQBZODDZCAPDD | COC1=CC(=CC=C1)C2=CC=C(NC(=O)C3CCCN(CC4=CN=C(C)N4C       | 0.222943 |
| VIEGMAUCXWHBOZ | COC1=CC2=CC(=C(O)N=C2C=C1OC)C(N(C)C3CCCC3)C4=NN=N        | 0.226796 |
| VIFYHPTYIUPYQF | CN(CC1=CN(N=C1C2=CC(C)=CC=C2)C3=CC=C(C)C=C3)CC4=NC=      | 0.251472 |
| VIOBTPHIMFHDZ  | CC1=CC=CC(C)=C1N2CCN(CC2)S(=O)(=O)C3=CC(C)=C(F)C=C3      | 0.253418 |
| VITWUYWKAAXNIA | FC(F)(F)C1=C/C=C(\C=C\1)S(=O)(=O)NC2=C/C=C\C(=C\2)\C3=C\ | 0.239315 |
| VIXLKURPAFTTTK | COC1=CC=CC=C1C(C2=NN=NN2CC3=CC=CC=C3)N4CCN(CC4)C         | 0.243379 |
| VIYPCMSAFNCFIA | CC1=CC=C(S1)\C=N\NC2=C(CI)C=C(CI)C=N2                    | 0.241553 |
| VJUNLCDAPXNXGM | CCN(CC)C1=CC=C(\C=N\N=C(/S)NCC2=CC=CO2)C=C1              | 0.233016 |
| VJXSSYDSOJBUAV | COC1=CC(CC2=C(C)C3=C(N=C2)N=C(N)N=C3N)=C(OC)C=C1         | 0.239802 |
| VKCHACDTSFSPJM | C1CC(CCC1N2CCN(CC2)C3=CC=CC=C3)C4=CC=CC=C4               | 0.274237 |
| VKIYIHWONRLGDU | CC1=C(OCCN2CCCC2)C(CI)=CC=C1                             | 0.227673 |
| VLAPRQOFMVJAIG | CN(CCCO)CC\C=C1\C2=C(CSC3=C1C=CC=C3)C=CC=C2              | 0.311595 |
| VLCFEOVOOOOSGK | OCCN(CCO)C1=CC(CI)=C(C=C1)C(C2=C(CI)C=CC=C2)C3=C(CI)C=   | 0.241192 |
| VLKBTYIEMXMZDV | CC1=C(NC2=NC3=C(CS2)C=CC=C3)C=CC=C1                      | 0.22625  |
| VLLYOPWHMGRPFM | CC(C)NC(=O)C1=CN=C(N2CCN(CC2)C3=CC=CC=N3)C4=CC=CC=(      | 0.224177 |
| VLVCQMWGNONVHX | COC1=C(CN2CCN(CC2)C(=O)C3=CC=CO3)C4=C(C=CC=C4)C=C1       | 0.237342 |
| VLXDGXQTILRZDH | CC1=C2SC3=C(CC(N4CCNCC4)C2=CC=C1)C=C(CI)C=C3             | 0.255853 |
| VLXKKLBPHRIRN  | [O-][N+](=O)C1=CC(CN2CCC(=CC2)C3=CC=C(F)C=C3)=CC=C1      | 0.225704 |
| VMBKXMUODGBTIE | NC1=NC(NC2=CC=CC=C2)=NC(CN3CCN(CC3)C4=C(F)C=CC=C4):      | 0.225367 |
| VMPRULWEVWCPNB | COC1=CC(OC)=C(C=C1)C(=O)C2CCCN(CC3=CC=CN3C4=NC=C(CI      | 0.222896 |
| VMYPXLBUMROAIU | [O-][N+](=O)C1=CC=CC=C1NN=CC2=CC=CC=C2CI                 | 0.244684 |
| VNFUBVNOOAIKTF | N#CC1=C(NCCCN2CCOCC2)O Vitas-M Laboratory,STK876204      | 0.224171 |
| VNTNPCOBOYPBLS | CC1=CC(C)=C(C)C=C1CN2CCC(CO)(CCOC3=CC=CC=C3)CC2          | 0.30468  |
| VNYLGEAYZFFEEM | CN(CC1=CN(C)N=C1C2=C(F)C=CC=C2)CC3=C(C)C4=C(N3)C=CC=     | 0.241921 |
| VOAUQLPXJRAWTL | CCN(CC)C1=NC(=NC(=N1)OCC#N)NC2=CC=C(CI)C=C2              | 0.237123 |
| VOJFJMFACGUGRG | FC1=CC=C(CN2CCN(CC2)C(C3=CC=CC=C3)C4=CC=CC=C4)C=C1       | 0.255935 |
| VOUMVHRAVBACH  | COC1=C2C3COC4C5CC(C(C(C2=CC=C1)N34)N5C)C(O)=O            | 0.244998 |
| VPAPYTJZDRDDX  | ClC1=CC(NC(=O)C2=CC=CS2)=CC=C1N3CCN(CC3)C(=O)C4=CC=      | 0.23989  |
| VPBFGUWKZZRKKM | CCN(CC)CC#CCC(O)(C1=CC=CC=C1)C2=CC=CC=C2                 | 0.302    |
| VPIDANAIZIMNGX | CC1=CC=C(C=C1)S(=O)(=O)NC2=C(C=CC=C2)C3=CC=CC=C3         | 0.227896 |
| VOXSNYFYCZTJJ  | FC1=C(F)C=C(C=C1)S(=O)(=O)NC2=CC(=CC=C2)C(=O)N3CCN(CC:   | 0.225476 |
| VRLXBGWQMKWOLJ | NC1=NC(NC2=CC=CC=C2)=NC(CN3CCN(CC3)C(C4=CC=CC=C4)C       | 0.255889 |
| VRMAPIMDRVKGOM | FC1=C(C=CC=C1)C2CC(=NN2C(=O)C3=C(Br)C=CC=C3)C4=CC=C(C    | 0.226985 |
| VRTKXFMWBVSAET | CCN1CC[N]2C3=CC=C(Br)C=C3C4=C2C1CCC4                     | 0.266972 |
| VRWQYDQWMLAJJC | CCOC1=C(NC(=O)C2=C3C=CC=CC3=NC(=C2)C4=CC(OC)=C(OC)C      | 0.232549 |
| VRWXAWXVRQECLB | CCC1=C2SC3=C(CC(N4CCNCC4)C2=CC=C1)C=CC=C3                | 0.235068 |
| VRZUALFDZNDYNG | COC1=CC=C(C=C1)C(=O)NCC2=CC=C(C=C2)N3CCN(CC3)C(=O)O      | 0.234594 |

|                 |                                                           |          |
|-----------------|-----------------------------------------------------------|----------|
| VSVJBELYLNOYHK  | NC(=NOC(=O)C1=C(Cl)C=CC=C1)C2=CN=CC=C2                    | 0.235064 |
| VTIAMSIKHJIUCA  | COC1=C(OC)C=C(C=C1)S(=O)(=O)N2CCN(CCOC3=C(Cl)C=CC=C3)C=C1 | 0.264699 |
| VTNHOKYMZDRTPA  | COC1=CC=C(OC2=NC(SC)=NC3=C2SC=C3)C=C1                     | 0.245579 |
| VUDAAHGTVVULMQ  | CC1=C(C)C(CN2CCN(CC3=CC=CC=C3)CC2)=C(NC(=O)C4=CC=CO       | 0.251893 |
| VUXGKEMXGHIQPD  | CN(C(=O)COC1=C(C=CC=C1)C(=O)NCCOC2=CC=CC=C2)C3=CC=C(      | 0.22389  |
| VVGLBONFTONOKG  | COC1=C(OC)C(OC)=C(CN(C)CC Enamine,T5403811                | 0.23806  |
| VVQZMWXNTUVBQK  | C(C1CCCC1)N2CCNC[C@H]2CC3=C4C=CC=CC4=CC=C3                | 0.259398 |
| VVUGUCNNBSFPHH  | COC1=CC2=C(C=C1)N=CC(=C2N3CCN(CC3)C4=CC=CC=C4)S(=O)       | 0.222652 |
| VVWJBEYLLMPLAH  | COC1=CC=C(C=C1)C(CNC(=O)C2=CC(=CC=C2)S(=O)(=O)NC3=CC      | 0.235246 |
| VWBMQAOJOWMESA  | CC(C)CC1=CC=C(CN2CCCC(C2)NC(=O)C3=CC=NN3C)C=C1            | 0.229517 |
| VWDKYMHHRGVWMZ  | OCC2(CCOC1=CC=CC=C1)CCN(CC3=CC4=C(OC3)C=CC(Cl)=C4)C       | 0.230783 |
| VWGZOWRGLFRLIU  | FC(F)OC1=C(\C=N\NC(=O)CCN2CCN(CC2)C3=CC=CC=C3)C=CC=       | 0.238981 |
| VWTJMQOMKFZCEP  | COC1=C(NC(=O)N2CCN(CC2)C3=C4C=CC=CC4=NC(C)=C3)C(Cl)=      | 0.249826 |
| VWXIJCRXGJVNDM  | C1CN(CCN1)C2=NC(=NC(NC3=CC=CC=C3)=N2)N4CCOCC4             | 0.254108 |
| VXEVEODGFIABW   | CC(C)(C)C1CCC(CN2[C@@H](CC3=CC=CC=C3)CN=C2NC4=CC=C        | 0.232467 |
| VXVGANJCDDDWQK  | FC1=C(C=CC=C1)N2CCN(CC2)C3=NC4=C(C=CC=C4)N=C3             | 0.224621 |
| VXXFUXPTNRIHFJ  | COC1=CC=C(CS\C2=N\CCN2)C=C1Cl                             | 0.229044 |
| VYDWXPSVGKFSAK  | COC1=CC(=CC(OC)=C1OC)C(=O)OC2=C(\C=N\NC(=O)C3=CC=C(C      | 0.23307  |
| VYOKUUZWHNNMIR  | CC(C)CNC1=C2C=CC=CC2=NC3=C1CCC3                           | 0.26963  |
| VYSLSSWHAOVRU   | CN1C2=C(C=CC=C2)C(C)(C)C13CC(=NO3)C4=CC(=CC=C4)S(=O)(:    | 0.225272 |
| VYWUQQFSUNSR    | COC1=C(OC)C=C2CN(CCC2=C1)C(\S)=N\C3=C(Cl)C=CC=C3          | 0.230343 |
| VZYMVGKXGSEFDE  | CCCN(CCC)S(=O)(=O)C1=CC(=C(Cl)C=C1)[N+](O-)=O             | 0.230161 |
| WAPTVQITJCEQMB  | CN1C=CC=C1\C=N\N2CCN(CC3=C(Cl)C=CC=C3)CC2                 | 0.252386 |
| WAVQNOTWADWNLX  | COC1=CC=C(CCC(C)NC2C3CC4CC(C3)CC2C4)C=C1                  | 0.236771 |
| WAZQANLJTOAIOI  | CCOC(=O)C1=C(SC2=C(Cl)C=CC=C2)N=C(N=N1)C3=CC=CC=C3        | 0.22417  |
| WBDSXISQIHMTGL  | CC1=NC(=C(N1)C2=CC=CC=C2)C3=CC=CC=C3                      | 0.236879 |
| WBJVNHWOQYRUQG  | CN(C)CC\C=C1/C2=C(SC3=C1C=C(Cl)C(F)=C3)C=C(F)C=C2         | 0.263942 |
| WBMNPSAUXXIQBE  | CCOC(=O)NC1=CC2=C(SC3=C(C=CC=C3)N2C(=O)N4CCN(C)CC4)       | 0.224097 |
| WBNMCRJMDFWRBV  | COC1=CC=C(C=C1)N2CCN(CC2)C(=O)COC(=O)C3=C(OCC4=CC=C       | 0.223932 |
| WBPKXTWRJ CZAKT | C1CCC(C1)[N]2N=NN=C2C(N3CCC(CC3)CC4=CC=CC=C4)C5=CC        | 0.232175 |
| WCCQTVAMVQMWWQG | CCCCOC1=C(OC)C=C(CNCCCN2CCOCC2)C=C1Br                     | 0.265046 |
| WCNGLYKQWKVZKW  | COC1=C(C=C2C=CC=CC2=C1)C(=O)NCC(N(C)C)C3=CC=CS3           | 0.237268 |
| WDFKKHNNOXFTJQ  | COC1=CC(=CC=C1)C(=O)NCC(N2CCN(CC2)C3=CC=C(F)C=C3)C4=      | 0.226701 |
| WDHFYKXRZMEJO   | CCOC(=O)C1=C(C)C=C(NC(=O)NC2=CC(Cl)=CC=C2)S1              | 0.240383 |
| WDYIDAUIWRIEAK  | COC1=CC=C(NC2=NC(CN3CCC(CC4=CC=CC=C4)CC3)=NC(N)=N2        | 0.223259 |
| WDZOOWQENASWEG  | CCN(CC)C1=C2N=CC=CC2=C(C=C1)[N+](O-)=O                    | 0.229091 |
| WECQZDGNZQWMJJ  | COC1=C(C=C(Br)C=C1)C(\C)=N\NC2=NCCN2                      | 0.235469 |
| WEXBZFNAXBELQT  | CCN(CC(O)COC(C1=CC=C(OC)C=C1)C2=CC=C(OC)C=C2)CC3=CC:      | 0.295646 |
| WFCLXYFMXYSPQT  | CN(C)C1=CC=[N+](CC2=CC=CC=C2)C=C1                         | 0.254305 |
| WFJQERALKFVBNW  | CCC(C)(C)N1N=NN=C1C(N2CCC(CC3=CC=CC=C3)CC2)C4=CN=C        | 0.25369  |
| WFPXFGCECGKRBQ  | COC1=CC2=C(CCN=C2C3=CC=C(C=C3)N(CCC1)CC1)C=C1             | 0.255494 |
| WFTNLTBSNBUOPC  | CC1=CC=C(C=C1)P(=O)(CSC(N)=N)C2=CC=C(C)C=C2               | 0.228855 |
| WFZDQZHEMCUHBQ  | COC1=CC(NC(=O)C2=CC=C(CN3CCC4=C(C3)C=CC=C4)C=C2)=CC       | 0.227027 |
| WGBAOHIEBXQJGQ  | FC(F)(F)C1=C(Cl)C=CC(NC(=O)NC2CC3CCCC(C2)N3CC4=CC=CC=     | 0.224295 |
| WHLKLDZLPQJBJK  | CC1=CC=C(C=C1)S(=O)(=O)NCCSC2=NN=NN2C3=C(C)C=CC(C)=C      | 0.243034 |
| WHPFYKPRHEFSL   | CCC(C)(C)CC1=CC(=CC=C1)C2(O)CCN(CC2)S(=O)(=O)C3=CC(C):    | 0.241887 |
| WIFQZKFWPZEZCK  | CCCN1CCCC(C1)C(=O)C2=CC(C)=C(OC)C(C)=C2                   | 0.229926 |
| WIGYQBIRHHDRBO  | NC(=NOC(=O)C1=C(Cl)C=CC=C1)C2=CC=C(Cl)C=C2                | 0.224912 |

|                 |                                                        |          |
|-----------------|--------------------------------------------------------|----------|
| WIKOYZFVDYYDNM  | O=C1CC(SC(=N1)N(C2=CC=CC=C2)C3=CC=CC=C3)C4=CC=CC=C4    | 0.228811 |
| WIOYPCBJJRBFS   | CCCN(CCC)C1=NC2=CC=CC=C2[N]3C(=NN=C13)C                | 0.231311 |
| WIPBFPCDERGUGD  | CC(NC1=N/C=N\C2=C\C=C/C=C\C1\2)C3=C/C=C\C=C\3          | 0.36322  |
| WJQFDPLKXZMOK   | NS(=O)(=O)C1=CC=C(CCNCC2=C(OCC3=CC=CC=C3)C=CC(Br)=C2   | 0.223011 |
| WJSYQWGVCFCKI   | CN(C)C1=NC(=NS1)C2=CC=CC=C2                            | 0.260304 |
| WJVMMRROWJDULS  | COC1=CC=C(CN(CCC2=CNC3=C2C=CC=C3)CC4=CC=C(OC)C=C4      | 0.249681 |
| WKBOJNOIWJKTEM  | CCCNCC1=C(Br)C=C(OCC2=CC=CC=C2)C(OC)=C1                | 0.242492 |
| WKMNILFJGKLWSI  | C(=C1C2=C(C=CC=C2)C3=C1C=CC=C3)C4=NC=CC=C4             | 0.274173 |
| WKZLOBWJQCENOT  | COC1=CC(OC)=C(OC)C=C1C(=O)ON=C(N)C2=CC=C(C)C=C2        | 0.314167 |
| WLBSGYDYSHNKOZ  | O=C(CN1C(=S)S\C1=C/C2=CC=CC=C2)C1=O)N3CCN(CCC4=NC=C    | 0.222881 |
| WLFDIVSMVXWZBA  | CC(C)CCC(CCN1CCCC1)C2=CC3=C(OCO3)C=C2                  | 0.253038 |
| WLIPRXHZDQOVQS  | FC1=C(Cl)C=C(C=C1)N=C(S)N2CCN(CC2)S(=O)(=O)C3=CC4=C(C= | 0.232304 |
| WLUKJQQTEJCLN   | FC1=CC(CNC2=C3C=CC(Cl)=CC3=NC=N2)=C(F)C=C1             | 0.225206 |
| WLZFOHOTRBTTSJ  | COC1=C(OC)C=C(C=C1)C2=NC(C#N)=C(O2)N3CCC4=C(C3)C=CC    | 0.229211 |
| WLZXVTQJXVOGAD  | CN(CCOC1=CC(=CC=C1)C(F)(F)CC2=CC=CC=C2                 | 0.244934 |
| WMRUUYUPEGDWAJ  | FC1=CC=C(\C=C\CN2CCC(CC2)OC3=CC=C(C=C3)C(=O)N4CCCC     | 0.22332  |
| WNEILMVLUGZDDP  | COC1=C(OC)C(Cl)=CC(CN(C)CC2CCCN(CCC3=C(F)C=CC=C3)C2)=  | 0.327497 |
| WNMYWKYVLNNOFF  | COC1=CC=CC=C1N2CCN(CC2)C(C3=NN=NN3C(C)(C)C)C4=CC=C     | 0.269633 |
| WNYKCRPUNXMPY   | CCOC(=O)C1=C(NS(=O)(=O)C2=CC=C(OC)C=C2)C=CC=C1         | 0.224172 |
| WOFILWXIKKUJDP  | CCCCN1C(=N)N(CC(O)COC2=CC=CC=C2OC)C3=CC=CC=C13         | 0.229144 |
| WOHOPYMSIBACDV  | CSC1=CC=C(NC(=O)NCCCN2CCN(CC2)C3=C(F)C=CC=C3)C=C1      | 0.225119 |
| WOOTZOPDGUAGF   | FC1=CC=C(SC2=C(CNC3=NCCN3)C=CC=C2)C=C1                 | 0.229485 |
| WOPJLGVIKBDAJE  | CCN1CCN(CC1)C2=CC3=C(C=C2NC(=O)C4=C(F)C=CC=C4)C(=O)N   | 0.225603 |
| WOWRJXYZJITKFL  | CC1=CC(OCCCN2CCC(CC3=CC=CC=C3)CC2)=C(C=C1)[N+](O)=     | 0.235655 |
| WPBQNAPISRQAAY  | COC1=C(OC)C=C(C=C1)S(=O)(=O)N2CCN(CCOC3=CC=C(Br)C=C3   | 0.228231 |
| WPHIDJCIKTYNE   | FC1=CC=CC=C1N2CCN(CC2)C(C3=CC=CS3)C4=NN=N[N]4CCCC5     | 0.240113 |
| WPNCEUSBTRQOHS  | SC(NC1CCN(CC2=CC=CC=C2)CC1)=NC3=CC=CC(Cl)=C3Cl         | 0.278473 |
| WSPHXZZWGGJJK   | OC1=C(C=C(Br)C=C1)C2(OC(=O)C3=C2C=CC=C3)C4=CC=CC=C4    | 0.234783 |
| WPUKMPYLKBAQPP  | CCCC(=O)OC1=C(C(C)=NN1C(C)(C)C)S(=O)(=O)C2=CC=C(C)C=C  | 0.225919 |
| WQDCHJQTDZAOTQ  | COC1=C(OC)C=C(CCN(C)C(=O)CC2=CC=C(C=C2)C3=CC=CC=C3)C   | 0.225168 |
| WQGZHPROJLLTMO  | COC1=CC(=CC=C1)C(=O)NC2=CC=C(C=C2)N3CCN(CC3)C(=O)C4    | 0.229794 |
| WQOSKDXGMMHOKK  | CCOC1=C(CN2C3CCC2CC(C3)C4=CC=C(C)C=C4)C=CC=C1          | 0.23264  |
| WQUDFRHRBHJOGE  | CC1=C(C)C(NCC2=NN=C(O2)C3=CC=CC=C3)=CC=C1              | 0.252841 |
| WQYNNMCZNHWKPY  | CN1N=C(C(CSC2=CC(Cl)=CC=C2)=C1Cl)C3=CC=CC=C3           | 0.234121 |
| WRQAZKMHSYJKQE  | COC1=CC=CC(=C1OC)C(N2CCN(CC2)C3=CC=CC(=C3C)C)C4=NN     | 0.246926 |
| WRQGZJRDFGPJKX  | SC(=NC1CCCC1)N2CCC3=C(C2)C=CC=C3                       | 0.223809 |
| WRZMZVAIXOZXPO  | COC1=CC=C(C=C1)C2=CSC3=C2C(=NC=N3)N4CCN(CC4)S(=O)(=    | 0.22951  |
| WSAQWMOUISYVFR  | CCCCN1CCC2=C(C1)C3=C(C=CC=C3)N2CC4=CC=CC=C4            | 0.231566 |
| WSGYVSIBSVBFRD  | CCN(CC)CCNC(=O)C1=CC=C(NC(=O)NC2=C3C=CC=CC3=CC=C2)C    | 0.232296 |
| WSHGVPVUMULZJFU | CCOC1=C(OCC2=C(Cl)C=CC=C2)C=CC(CNCCN3CCOCC3)=C1        | 0.293271 |
| WSKWRSVOYUZDNM  | CC1=C(CN2CCN(CC3=NC(=NO3)C(C4=CC=CC=C4)C5=CC=CC=C5     | 0.234463 |
| WSPUPKXQOSRPIB  | CCN1C=CN=C1CN2CCCC(C2)C(=O)C3=C(OC)C=CC(Cl)=C3         | 0.231671 |
| WTJBFLDUSUCDMV  | ClC1=CC=C(C=C1)C2=NN=C(NC3=NCCCC3)O2                   | 0.248857 |
| WTVCSVAQQCCHLN  | [O-][N+](=O)C1=C(C=CC=C1)S(=O)(=O)NC2CCCCCCC2          | 0.233406 |
| WTWTXGRZMUQXMI  | ClC1=C(NC(=O)NC2=CC3=C(CCC3)C=C2)C=CC=C1               | 0.226058 |
| WUCYLECPMWLREK  | CCN1CCN(CC1)C2=C3C=CC=CC3=C(C=N2)C(=O)NC4=C(C=CC=C     | 0.255955 |
| WUEUITYGIMFDKP  | COC1=C(C)C(OC)=C(CNCCC2=C(F)C=CC=C2)C=C1               | 0.233672 |
| WUFSIDXHZXRVAW  | SC(=NC1=CC=CC=C1)N2CCC(CC3=CC=CC=C3)CC2                | 0.257299 |

|                 |                                                        |          |
|-----------------|--------------------------------------------------------|----------|
| WUYSOFHLTPJEGK  | C1CN=C(C1)NC2=NN=C(O2)C3=CC=CC=C3                      | 0.225391 |
| WVUKBGUNJPPZKT  | COC1=C(C=CC=C1)N2CCN(CC2)C(=O)C3=C(C)ON=C3C4=C(Cl)C=   | 0.245562 |
| WVXCLKIMORBOGJ  | CC1=CC=C(NCSC2=CC=C(Cl)C=C2)C=C1                       | 0.232499 |
| WWJNOIHSOVGFHS  | CCC1=NN=C2SCC(=NN12)C3=CC=C(OC)C=C3                    | 0.226705 |
| WWWQLEMJBXHDDN  | CN1CCN(CC1)C2=C(F)C=C(NC(=O)CSC3=CC=CC=C3)C=C2         | 0.239555 |
| WXIAPDQHCQQEEP  | CCN(CC)C1=C2CN(CC)CCC2=C(C#N)C(NCC3=CC=CC=C3)=N1       | 0.245069 |
| WXLHGVADSVDFPI  | FC1=CC(COC2=C(CNC3=CC=CC=C3)C=CC=C2)=CC=C1             | 0.241011 |
| WXMWPVRVZDVLPI  | C(CN1CCN(CC1)C2=NC=CC=N2)OC(C3=CC=CC=C3)C4=CC=CC=C     | 0.248522 |
| WXVYHMAMNABJEM  | FC1=C(NC(=O)C(=O)NCC(N2CCC3=C2C=CC=C3)C4=CC=CO4)C=C    | 0.225348 |
| WYDUPMJEJGLJZ   | COC1=CC=C(C=C1)N2CCN(CC2)C(CNS(=O)(=O)C3=CC=C(C)C=C3   | 0.249279 |
| WYLWVVBBCWZWLQ  | CN1N=CC(Cl)=C1C(=O)N2CCN(CC2)C3=CC=CC(C)=C3C           | 0.237419 |
| WZJWDOBVMVCUFQV | CCN1C=CN=C1CN(C)CC2=CN(N=C2C3=CC=C(F)C=C3)C4=CC=C(I    | 0.230251 |
| WZQCPYUVPQREPF  | CN1CCN(CC1)S(=O)(=O)C2=CC=C(C=C2)N3CCN(CC3)C4=C(O)C=   | 0.251302 |
| XAYBGZWXMSUFMR  | COC1=CC=C(NC(=O)CSC2=NC3=C(S2)C=C(NC4=NC(=NC(=N4)N5    | 0.223728 |
| XBMYNVZJGFJCAE  | C\C(=N/NC1=NC(=CC(C)=N1)C2=CC=CC=C2)C3=CC=CO3          | 0.223491 |
| XBUMEOXSWOGGLL  | ClC1=C(SC2=C1C=CC(Cl)=C2)C(=O)NC3CC3                   | 0.229072 |
| XCEVZULHCRZQMO  | [O-][N+](=O)C1=CC=C(S1)C(=O)NCC(N2CCCC2)C3=CC=CO3      | 0.247269 |
| XCLJMZPIMGHSRQ  | COC1=C(OC)C=C(CCN2=C(C=CC(=C2)N3CCN(CC3)C(=O)C4=C(C    | 0.245013 |
| XDJJNYNUDCVIHO  | COC1=CC(OC)=C(CN2CCN(CC3=C(F)C=CC=C3)CC2)C=C1          | 0.227156 |
| XDLHAHDPPCGSAH  | CCOC1=C(NC(=O)NCCC2=CNC3=C2C=CC=C3)C=CC=C1             | 0.230131 |
| XEDVBYLUISOGOO  | [O-][N+](=O)C1=CC=C(OCCCCN2CCC3=C(C2)C=CC=C3)C=C1      | 0.252232 |
| XEGDMEBEXWICKV  | CN(C)CCCNC1=CC(=NC2=CC(=N[N]12)C3=CC=CC(=C3)C)C        | 0.23619  |
| XEHCNLUYVHHNQK  | CC1CN(CCN1C2=CC(C)=CC=C2)C3=C(C#N)C(C)=CC(C)=N3        | 0.247572 |
| XEHZGYNIGPCKHJ  | O=C(NC1CCCC1)N2CCN(CC2)C3=NC(=CS3)C4=CC=CC=C4          | 0.237399 |
| XEIKLIBXIDFFRZ  | ClC1=CC(Br)=C(OC(=O)NCC(N2CCCC2)C3=CC=CO3)C=C1         | 0.240251 |
| XEMIIHFCHKQMEP  | CC1=NC2=C(C=NN2C3=C1CCC3)C4=CC=C(F)C=C4                | 0.235875 |
| XEXJCSNBUIARJF  | COC1=CC=C(NC2=C3C=CC=CC3=NC=C2)C=C1                    | 0.240198 |
| XEFWWGGXLFVFR   | COC1=CC=C(C=C1)N=C(S)N(CCCN2CCC(C)CC2)CC3=CC=CS3       | 0.288579 |
| XFFKNCXOGHDQDV  | CCN(CC(=O)NC1=CC(=CC=C1)S(=O)(=O)N(C)C2=CC=CC=C2)CC3=  | 0.227728 |
| XFOMWTKVHWXVRS  | COC1=CC=C(C=C1)C2=NOC(CSC3=NN=C(CC4=CC=CC=C4)N3C5      | 0.223917 |
| XFPRVFPKQLFBJ   | OC(COCC1=CC=C(Cl)C=C1)CN2CCC3=C(C2)C=CC=C3             | 0.230016 |
| XFRKOROYPDUFGL  | CCCCC1CN2CCC3=C(NC4=C3C=CC=C4)C2(C)C1                  | 0.259466 |
| XGAGHBMKLFMKNK  | C=1C=C(C=CC1SCC2=CN3C=CSC3=N2)Cl                       | 0.233886 |
| XGCVRMWOJYNHRT  | CC1=CC2=C(C=C1)[N+](CC3=CC=CC=C3)=CC=C2C               | 0.237677 |
| XGYJQKQULCSLIR  | C(COC1=CC=CC=C1)OCCN2CCN(CC2)C(C3=CC=CC=C3)C4=CC=C     | 0.234357 |
| XHURKZDJGLSJEZ  | COC1=CC=C(CCC(C)NC2CCCCC2)C=C1                         | 0.274606 |
| XIGKSTOGNSHTNH  | COC1=CC=C(C=C1)C2=NN(C=C2\C=C\C(=O)N3CCN(CC3)C4=NC=    | 0.225272 |
| XINRDZSLRJVSV   | CC(=O)NC1=CC2=C(C=C1)C3=C(C=CC=C3)C2N4CC5CCC(CC5)C4    | 0.236251 |
| XIOZDCDYRARUFM  | CC1=C(CN2CCN(CC2)C3=CC(C)=NC(C)=C3)N=C(O1)C4=CC=C(Cl   | 0.320242 |
| XKIFTEHOCFPRJE  | CCN(CC)CCOC1=CC=C(Br)C=C1                              | 0.235505 |
| XKIPMVXDDDLWCQ  | ClC1=CC(=CC=C1N2CCOCC2)NC(=O)C3CCCC3                   | 0.231995 |
| XKVSASJQGCZUIK  | CCN(CC)CC(=O)NC1=CC=C(C=C1)C2=NC3=CC(=CC=C3O2)NC(=C    | 0.226503 |
| XLIQQHXGYXNKJK  | Cl.CC(C)CCC(O)(C(CN1CCOCC1)C2=C/C=C\C=C\2)C3=C/C=C\C=C | 0.229004 |
| XLKCZXTWMUKOPW  | CCC(=O)N(CCCN(C)C)C1=NC(=CS1)C2=CC(=CC=C2OC)OC         | 0.230786 |
| XMBVYHDHLZZLBV  | COC1=CC(NC(=O)CN2CCCC2)=C(OC)C=C1NC(=O)C3=CC=C(F)C     | 0.233753 |
| XMHNKNSRQRXIGV  | COC1=C(OC)C=C(CNC2=NC3=C(C=CC=C3)N2CC4=CC=CC=C4)C=     | 0.254193 |
| XMNODAOMCZBXC   | ClC1=C(C=C(Br)C=C1)C(=O)NC2=CC=C(C=C2)N3CCN(CC3)C(=O)  | 0.251374 |
| XMZLNSMXWQVWPG  | COC1=CC=C(OC)C(=C1)CN2CCN(CC2)C3=CC=CC=C3OC            | 0.225576 |

|                 |                                                        |          |
|-----------------|--------------------------------------------------------|----------|
| XMZXFBNWTRFDHM  | CSC1=NN=C(N1C)C2=CC3=C(S2)N(C)N=C3C4=CC=CC=C4          | 0.234533 |
| XNBYSSAJBPEUKS  | COC1=C(OCC2=C(Cl)C=CC=C2)C(Cl)=CC(CNCCO)=C1            | 0.23044  |
| XNSBJXRQWVZUOP  | CCC1=CC=C(OCC(=O)NCC(N2CCCC2)C3=CC=C(Cl)C=C3)C=C1      | 0.234307 |
| XNZVPGGSVXSUSN  | COC1=CC=C(C=C1)\C=N\[N]2N=NC3=CC=CC=C23                | 0.223457 |
| XOAHCZLVGODQES  | COC1=C(C)C(OC)=C(CN2CCCN(C)CC2)C=C1                    | 0.254227 |
| XOLWHVLUFVZICJ  | FC1=CC=C(C=C1)N2CCN(CCCNC(=O)NC34CC5CC(CC(C5)C3)C4)    | 0.277956 |
| XOPKXVAUECUSFM  | CNC1=C(N=NC(=N1)C2=NC=CC=C2)C3=CC=CC=C3                | 0.257234 |
| XOSNMLBMTVINPR  | C=CCC1=C(OCCCCN2CCCC2)C=CC=C1                          | 0.251863 |
| XPOIPIVHRYJHLA  | CN(C)C1=NC(NC2=CC=C(F)C=C2)=NC(N\N=C\C3=CC(=C(Cl)C=C3) | 0.238663 |
| XQMYCQQCDKZGI   | CC1=NN(C2=CC=C(Br)C=C2)C(=O)C3=C1C=CC=C3               | 0.22243  |
| XQRAEIQSGHFRC   | FC1=CC=C(C=C1)C2N(CC3=CC=CN3C4=NC=CC=N4)CCC5=C2NC      | 0.286568 |
| XQRGYPGMSXNSLK  | CCNC1=NC(=NC(SCCOC2=C(Cl)C=C(Cl)C=C2)=N1)N(C)C         | 0.227039 |
| XQSONAFMYBJTGJ  | COC1=C(OCCNC2=C(C=CC(=C2)N3CCCC3)[N+](O)=O)C=CC(       | 0.226328 |
| XQWPPFJWBZMAGP  | FC1=CC=C(\C=N\N2CCN(CC3=CC=CC=C3)CC2)C=C1              | 0.2462   |
| XRCKKZPNRBOXOH  | C(SC1=NC(C2=CC=CC=C2)=C(N=N1)C3=CC=CC=C3)C4CCCCO4      | 0.283175 |
| XRJDYIVGHNOQNU  | COC1=CC=C(CN2CCCCC2)C(=C1)C                            | 0.232936 |
| XROYHKODSHBIJX  | CC1CCN(CCOCCOC2=C(Br)C=C(C)C=C2Cl)CC1                  | 0.289022 |
| XRTLIRBMJKGLAX  | CCN(CC)CCCC(C)NC1=C2C=CC=C(Cl)C2=CC=N1                 | 0.279719 |
| XRYRDSCHVPEDDZ  | COC1=CC=C(CC2(CO)CCN(CC2)C(C)CC3=CC=C(Cl)C=C3)C=C1     | 0.26003  |
| XSDCKVSJIPPTLU  | COC1=CC(=CC(OC)=C1OC)C2=NN=C(O2)C3=CC(OC)=C(OC)C=C3    | 0.271856 |
| XTVRXXHHMRQUOD  | CCOC1=C(NC(=O)C2=C(C=CC=C2)C3=NC(=NO3)C4=C(OC)C=CC=    | 0.236184 |
| XTWWYLPZORXWTF  | COC1=CC=C(CN(C)C2C3=C(C=CC=C3)C4=C2C=CC=C4)C=C1        | 0.243167 |
| XTYXZJSDLRFGGW  | CC1CCN(CCCNC(=O)C2=CC3=C(C=C2)C(Cl)=C4CCCC4=N3)CC1     | 0.260185 |
| XUPRUNUGPGVWPP  | CN1C(C)=C(CN2CCC(CO)(CC3=CC(=CC=C3)C(F)(F)F)CC2)C4=C1C | 0.224862 |
| XUWYSQMGAWAZQW  | O=C(N1CCN(CC1)C2=NC=CC=C2)C3=CN(N=C3C4=CC=CC=C4)C!     | 0.227142 |
| XVDDBSXNXPJEM   | CN(C1=CC=CC=C1)C2=CC=C(\C=N\NC(=O)CC#N)C=C2            | 0.238236 |
| XVMDUCPLYPUKEG  | CC1=NN(C(N2CCCC2)=C1\C=N\NC(S)=NC3=C(F)C=CC=C3)C4=C1   | 0.251711 |
| XVVBDUOUGLIMR   | CN(C)C1=NC(=NC(=N1)N(C)C)N(CCOCC2=C(C)C=CC=C2)C#N      | 0.24046  |
| XWZUSZPPQUXYNV  | FC1=CC=C(C=C1)N=C(S)N2CCN(CC2)C3=CC(=CC=C3)C(F)(F)F    | 0.254867 |
| XXCFJIHBZYKRJW  | NC(=N)SCC1=NC=CC=C1                                    | 0.241112 |
| XXEVSQAQCVZSPDL | CN1CCN(CC1)S(=O)(=O)C2=CN=C(SCCOC3=CC=C(Cl)C=C3)C=C2   | 0.234732 |
| XXLDPDOCCFMHIA  | COC1=CC2=C(C=C1)C=C(C=C2)C(=O)C3CCCN(CC4=NC(C)=CC=C    | 0.230503 |
| XYEXGCQCDHETHC  | CCN(CC)CC(O)COC1=CC2=C(C=C1)N(C(C)=C2C(C)=O)C3=CC=CC   | 0.241645 |
| XYSDIGROKUHACN  | COC1=C(OCC2=C(Cl)C=CC=C2)C=CC(\C=N\N=C(N)N)=C1         | 0.234591 |
| XYXKHGAQYACMPR  | COC1=CC(OC)=C(CN(C)CC(=O)NC2=C(C=CC=C2)C3=CC=CC=C3)(   | 0.222502 |
| XYZXEIUKQGUHB   | ON=C1C2=C(C=CC(=C2)S(=O)(=O)N3CCCC3)C4=C1C=C(C=C4)S    | 0.224278 |
| XZCQCHRLIZPEIN  | CC1=NC(NCC2=CC=CC=C2)=NC(N\N=C\C3=CC(Cl)=CC=C3)=C1     | 0.224395 |
| XZDFNIDCZGYSMU  | CCOC1=CC=C(CN(CC2=CC=CO2)C(C3=CC=CS3)C4=NN=NN4C(C      | 0.232895 |
| XZHFWCWADXWVLL  | COC1=CC=C(Cl)C=C1NC(=O)Cl Enamine, T5324190            | 0.245539 |
| XZOZBBDBFWCZCC  | COC1=CC=C(C=C1)C(CNC(=O)C2=CC=C(O2)C3=C(Cl)C=CC=C3)N   | 0.236303 |
| XZTPUNHHNWXMLJ  | CCOC(=O)C1CN(C)CCC1=O                                  | 0.245831 |
| XZZUXWKCGOUDZ   | COC1=C(OCC2=CN=C(Cl)C=C2)C=CC(CNCCC3=CC=C(F)C=C3)=C:   | 0.29799  |
| YACADTMYZRABHM  | CN1N=C(C(C#N)=C1N2CCN(CC2)C3=CC=C(F)C=C3)C(F)(F)F      | 0.235865 |
| YAEUAZNKYXGVKH  | COC1=CC(CN2CCN(CC2CCO)C3CCN(CC3)C4=C(C)C(C)=CC=C4)=    | 0.227092 |
| YAQAMRXMQVIDBU  | COC1=CC=CC(OC2=NC(=NC3= Vitas-M Laboratory, STK553023  | 0.234725 |
| YAVBNHNDCLVGOW  | COC1=CC(OC)=C(CN(CCN(C)C)CC2=CC=CC=C2)C=C1             | 0.228011 |
| YBGHYHKRKJSQHV  | C(N1C=CC(=N1)C2=CN=C(S2)C3=CC=CC=C3)C4=CC=CC=C4        | 0.22958  |
| YBNZHOBZGSLGG   | CC1CCN(CCOCC2=CC(Cl)=C(Cl)C=C2)CC1                     | 0.240935 |

|                 |                                                        |          |
|-----------------|--------------------------------------------------------|----------|
| YCHCRFRAIDBMRW  | CCOC1=CC=C(NC2=NC(CSC(=S)N3CCN(CC3)C4=CC=CC=C4)=NC     | 0.224948 |
| YCIJUAKRNMVHFQ  | ClC1=CC(NC(=O)NCCN2CCN(CC2)C3=CC=CC=C3)=CC=C1          | 0.233079 |
| YCNJFNRSARUTEH  | [O-][N+](=O)C1=C(Cl)C=CC(=C1)C2CC(=O)NC3=C4C=CC=CC4=CC | 0.224618 |
| YCQUKKCTTOZLLL  | COC1=C(CC(N)=NOC(=O)C2=CC=CS2)C=CC=C1                  | 0.25362  |
| YCTVRLVATDMYPU  | CCCCCCCC[N+]=C2C=CC3=C(C=CC=C3)C2=CC=C1                | 0.225564 |
| YDADTNARCJIMQM  | OC1=CC(=CC=C1)C2=NN=C(N=N2)C3=CC(O)=CC=C3              | 0.294578 |
| YDQUEQNSRJTDHO  | CN(C)C1=NC(=NC(=N1)OCC#N)NC2=CC=C(Cl)C=C2              | 0.230697 |
| YEFOWGFKCOZUDR  | [O-][N+](=O)C1=CC=C(C=C1)\C=N\N2CCCCC2                 | 0.239733 |
| YEQQSYNQFNIVQJ  | COC1=C(OC)C=C(C=C1)C2=NOC(CCCOC3=CC=CC=C3)=N2          | 0.271667 |
| YFXVIJAMQNMHR   | CN1CCN(CC1)[S+][O-](=O)C2 Vitas-M Laboratory,STK409218 | 0.238345 |
| YGBFCWQOXYENNE  | O=C(N1CCCCC1)C2=CC(=CC=C2)S(=O)(=O)N3CCN(CC3)C4=C      | 0.235688 |
| YGEMUJHRXZSIBA  | ClC1=CC=CC(=C1)N2CCN(CCCNC(=O)C3CCC(=O)N3CC4=CC=CC     | 0.223234 |
| YGGOBODDGKFPLE  | O=S(=O)(N1CCN(CCOC2=CC=CC=C2)CC1)C3=CC=CS3             | 0.223601 |
| YGLXNWNMISTXHH  | CCOC(=O)C1=C(C)N(CCC(=O)N2CCN(CC2)C3=C(OC)C=CC=C3)C(   | 0.23313  |
| YGWFWAPUTWVGDK  | COC1=CC(NC(=O)C2CC(=NO2)C3=CC=CC(OC)=C3OC)=CC(OC)=C    | 0.234433 |
| YGWSMQFKFPYRRP  | CC1=CC=C(C=C1)C2=NN(C=C2CNCC3=CC=CC=C3)C4=CC=CC=C      | 0.223296 |
| YHAIUXOOUWRJIE  | CN1CCN(CCOCCOC2=C(Cl)C=C(Cl)C=C2Cl)CC1                 | 0.250417 |
| YHVDSLJVICOSOM  | COC1=CC=CC2=C1C3=C(N=CN3)C4=C2C=CC=C4OC                | 0.230999 |
| YHZKIEWEQQRAHY  | C(N1CCN(CC2=CC=CC=C2)CC Vitas-M Laboratory,STK146865   | 0.272495 |
| YIBWFLHBLUUTEL  | O=C(NC(C1=CC=C(C=C1)C2=CC=CC=C2)C3=NC=CN=C3)C4CCN(     | 0.234033 |
| YIIQGQGVJVFUGR  | CC(NC(S)=NC1=C(C)C(C)=CC=C1)C(N2CCN(C)CC2)C3=CC=CC=C3  | 0.285682 |
| YIPQJDIPICHMBD  | C[N]1C(=CC2=C1C=CC3=[N+][O-]ON=C23)C4=CC=CC=C4         | 0.230987 |
| YJAKNSVSOFNUEU  | C1CCN2C(CC1)=NC=C2C3=CC=C(C=C3)C4=CC=CC=C4             | 0.242055 |
| YJBWNJQTWJVEDN  | CC(C)CCNC(S)=NC1=CC(C)=CC=C1                           | 0.231895 |
| YJCNXTICFCJHSA  | CCN1CCN(CC2=CC=C(NC(=O)NC3=C(Cl)C=CC=C3)C=C2)CC1       | 0.239704 |
| YJFVNNCYAHNNJN  | CSC1=CC=C(NC(=O)NCCN2CCC3=C(C2)C=CC=C3)C=C1            | 0.224092 |
| YJOAHLWLYTVYGJ  | ClC1=CC=CC(=C1)N2CCN(CC2)CC3=NC(=NO3)C4=CC=CC=C4       | 0.223707 |
| YJSATLBWFLERNZ  | NC1=C(\C=C\C2=C(N)C=CC=C2)C=CC=C1                      | 0.234456 |
| YJXVBAMNAUTWBU  | COC1=CC=C(NC2=NC3=C(C=CC=C3)C(=N2)N4CCCC4)C=C1         | 0.225531 |
| YKATUCHACQFGBL  | ClC1=C(Cl)C=C(CN2CCCCC2)C=C1                           | 0.233431 |
| YKJWAZAPTHMAIX  | CCN(CC)C1=CC=C(CNC2=NC=C(Br)C=C2)C=C1                  | 0.241442 |
| YKJYNHWALGMAIC  | ClC1=CC(=CC=C1)N2CCN(CC2)C(=O)C3=C(NC(=O)C4=CSCCO4)C   | 0.227475 |
| YKWJBTXSMBSCM   | CC(C)(CN1CCN(CC1)C(C2=CC=CC=C2)C3=CC=CC=C3)NS(=O)(=O   | 0.266636 |
| YLDDBXFNJPDEFG  | COC1=CC=C(C=C1)C2=NNC=C2\N=N\C3=CC=CC=C3               | 0.232943 |
| YLQCIDVEFQMREC  | CCOC1=C(OCC2=CC=CC=C2)C=CC(\C=N\NC(=O)C3=CC=C(CN4C     | 0.227145 |
| YMRIBQFQMYWELA  | ON(C(=O)CF)C1=CC=C(\C=C\C2=CC=CC=C2)C=C1               | 0.252226 |
| YMSXBMKZFMDQFV  | COC1=C(C=CC=C1)C2=C(C3=C(S2)C=CC=C3)C4=CC=C(OCCN5C     | 0.248383 |
| YMZVLZHCYJIACQ  | ClC1=CC=C(CON2C(=NC3=C2C=CC=N3)C4=C(Cl)C=C(Cl)C=C4)C   | 0.22634  |
| YNBSSBNRDINQBO  | CC1=CC(C)=C(NS(=O)(=O)C2=CC(=CC=C2)C(=O)NC3CCN(CC4=CC  | 0.227804 |
| YNUKFHCQPMDEIC  | CC1=CC(N\C(S)=N\C2=NC=CC=C2)=CC(C)=C1                  | 0.230106 |
| YNZWVGC MZYGYOV | CN1C(NC2=CC(Cl)=CC=C2)=NC3=C1C=CC=C3                   | 0.236738 |
| YOQPNFAYDVSJIE  | COC1=C(OCC2=NC(=NO2)C3=CC(=CC=C3)[N+][O-]C=CC=C1       | 0.229033 |
| YPDFVIZRPIOETL  | CN1CCN(CCOCCOC2=C(Cl)C=C(C)C=C2C)CC1                   | 0.232407 |
| YPDNPMKGMDEINC  | COC1=C(C=C(C=C1)C(=O)NC2=CC=C(C=C2)N3CCN(CC3)C(=O)C4   | 0.226413 |
| YPDVXRQZIAHANI  | CN(C)CCC1(CC\C=C\C2=CC=C NCI Chemotherapeutic Agents R | 0.235455 |
| YPIFHZHPFBNDDA  | CC1=CC(Cl)=C(OCC(O)CN2CCN(CC(O)COC3=C(Cl)C=C(C)C=C3)C  | 0.231733 |
| YPMIXQBDVYQRG   | COC1=NC(=NN=C1C2=CC=CC=C2)C3=CC=CC=C3                  | 0.234186 |
| YQJNGUIVACYDCQ  | COC1=C(C)C(OC)=C(CN2CCN(CC2)C3=NC=CC=C3)C=C1           | 0.223707 |

|                 |                                                         |          |
|-----------------|---------------------------------------------------------|----------|
| YQUZBSAZFAVTFB  | CNCCOC1=CC(Cl)=C(Cl)C=C1                                | 0.258295 |
| YRCLNXAIBPJRBO  | CN1CCN(CC1)C2=C(NC(=O)C3=CC=C(C=C3)S(=O)(=O)N4CCCCC(    | 0.23079  |
| YROSPBQXYVDYAU  | OCCN1CCN(CC(O)COC(C2=CC Enamine,T5387682                | 0.250185 |
| YRUFWIJTPCWFSO  | CC1=N[N](C(=C1)C)C2=NC(=CS2)C3=CC=CC(=C3)Cl             | 0.231552 |
| YRWYXGXPZQBKW   | COC1=C(F)C=C(C=C1)C(=O)C2CCCN(CC3=CC=CN3C4=NC=CS4)C     | 0.235309 |
| YSVVNZDXGKELPV  | [O-][N+](=O)C1=CC=C(NCCCN(S(=O)(=O)C2=CC=CC=C2)C=C1     | 0.226359 |
| YSWDVDXLKARVHE  | CC1=C(C)C(=CC=C1)N2CCN(CC2)C(C3=NN=NN3CC4CCCO4)C5=      | 0.256678 |
| YTBLBUCXWXBYTR  | SC(NC1=CC=CC=C1)=NC2=C(Cl)C=C(Cl)C=C2                   | 0.23132  |
| YTCYEKCFMOMEJ   | CC1(C)COC(=N1)C2=CC=C(F)C=C2)[N+][[O-]]=O               | 0.234968 |
| YTKCEXKGQFVUGH  | COC1=CC(=CC(OC)=C1OC)C(=O)NC2=CC3=C(CCC4=C(C=CC=C4)     | 0.278147 |
| YTLJAXHEKBPJQN  | CC1=CC(=CC=C1)N=C(S)NC2CCSC3=C2C=CC=C3                  | 0.255988 |
| YTPFRDGVWSSNF   | CN(CCOC1=CC=C(Br)C=C1)CC(O)COC2=CC=C(C=C2)C#N           | 0.326304 |
| YTRGFQPXRJRJV   | C1CN(C(N1C2=CC=CC=C2)C3=CN=CC=C3)C4=CC=CC=C4            | 0.224447 |
| YTZREVYYYUASL   | COC1=CC(OC)=CC(CN2CCN(CC3=C(OC)C(OC)=CC=C3)CC2)=C1      | 0.243109 |
| YUAAKHMUHFDSQF  | CC1=NC2=C(C=CC=C2)N1CC3=C(C)C=CC=C3                     | 0.276316 |
| YUASKPYMGRGXGC  | CN1CCN(CC1)C2=CC(NCCOC3=CC(C)=CC=C3)=C(C=C2)[N+][[O-]   | 0.268209 |
| YUEHBYHERLEJFD  | CC(C)(C)[N]1N=NN=C1C(N(CC2CCCO2)CC3=CC=CO3)C4=CC=CC     | 0.226421 |
| YURSBVUJARRCNH  | COC1=CC(OC)=C(C=C1)C(=O)ON=C(N)CC2=CC=C(C=C2)[N+][[O-]  | 0.240587 |
| YVFSPCXAFARSTI  | CCN1CCN(CC1)C2=C(NC(=O)C(C)OC3=CC=C(F)C=C3)C=C(C=C2)!   | 0.224237 |
| YVNXXZDHQCSSQMR | C(=C1C2=C(C=CC=C2)C3=C1C=CC=C3)C4=CC=NC=C4              | 0.225737 |
| YVPHSJUQTKQEGB  | COC1=CC=C(CN2N=NN=C2CN(CC3=CC4=CC(C)=CC=C4N=C3O)(       | 0.223807 |
| YVSYLHWDHCXCTK  | C1OC2=CC=C(CN3CCN(CC3)C(C4=CC=CS4)C5=NN=N[N]5CCC6:      | 0.248013 |
| YVXIXZJFMGMWDW  | CCN(CC)CCNC(S)=NC1=CC2=C(C=C1)N=C(C=C2)N3CCN(C)CC3      | 0.267182 |
| YWBVLUMOMXAOPU  | CN1CCN(CC1)C2=NC(CSC3=CC=CC=C3)=NC4=C2C(C)=C(C)S4       | 0.238684 |
| YWLNLLOBROCLLKK | CC1CN(CC(C)N1)C2=CC(NCCOC3=C(C)C=CC=C3)=C(C=C2)[N+][[O- | 0.228437 |
| YWNFILIWSMKDLW  | CCN(CC)CCNC1=NC(SC)=NC2=C1C3=C(CN(C)CC3)S2              | 0.242075 |
| YWOOXOMNPREADPY | FC(F)(F)C1=CC(=CC=C1)N=C(S)NC(C2=CC=CC=C2)C3=CC=CC=C3   | 0.223711 |
| YXHPXFQFVVHCME  | ClC1=C(Cl)C=C(C=C1)N2N=NN=C2C3=CC(Cl)=C(Cl)C=C3         | 0.242267 |
| YYEWCRIJAUKIKEQ | CCOC(=O)C1=C(N=C(OC2=CC=C(F)C=C2)C(=C1)C#N)C3=CC=CC=    | 0.255482 |
| YYFIPTVPONYMFK  | FC(F)(F)C1=CN=C(C=C1)N2CCN(CC2)C3=CC(=NC4=NC=NN34)C!    | 0.227304 |
| YYHQUEROCIPNHFR | COC1=CC(=CC=C1)C2=NOC(=N2)C3=CN=C(Cl)C=C3               | 0.245487 |
| YYVASTQFSXAUPG  | ClC1=CC=C(NC(=O)NC2=CC=C(C=C2)C#N)C=C1                  | 0.238012 |
| YYVCSTQMHUYFGD  | CC(C)(C)NC(=O)CN(C1CCN(CC1)CC2=CC=CC=C2)C(=O)CN3N=C(I   | 0.22948  |
| YZBPKQBEEHXFCA  | CC1=CC=C(OCCSC2=C3N=CNC3=NC=N2)C=C1                     | 0.225552 |
| YZEDAXTWYXOVDJ  | [O-][N+](=O)C1=C(NCC2=CN=CC=C2)C=C(C=C1)N3CCN(CC3)C(=   | 0.238716 |
| YZULJWWBOANRNC  | C1CCCN(CC1)\C=C\C2=NN=NN2C3=CC=C(C=C3)C4=CC=CC=C4       | 0.283704 |
| YZZZCDZBYLHNLN  | O=C(C1CCCN(C1)C2CCC2)C3=C4C=CC=CC4=CC=C3                | 0.239325 |
| ZABIMHRWORHDFC  | CCOC(=O)C1=C(NC(=O)CN2CCCC2)SC(CN(C)C)=C1C3=CC=CC=      | 0.252603 |
| ZASVDCRANMSGBG  | FC1=CC=C(CN2CCN(CC2)C3=NC=NC4=C3C(=CS4)C5=CC=CC=C!      | 0.255687 |
| ZATCHDAVJHRYTK  | COC1=CC(CC(=O)NC2=NC(=CS2)C3=CC(F)=C(F)C=C3)=CC(OC)=C   | 0.22806  |
| ZBFZRHMNASCPJB  | CCN(CC)CCNC(=O)C1=C2C=CC=CC2=NC(NC3=CC(OC)=C(OC)C=C     | 0.224364 |
| ZBNGBSRKPXQTGI  | FC1=CC=C(C=C1)N2CCN(CC2)P(=O)(OC3=CC=CC=C3)OC4=CC=C     | 0.280635 |
| ZBRAZSSUZUUNKU  | COC1=CC=C(C=C1)C(=O)NCC(N2CCC3=C2C=CC=C3)C4=CC=CO4      | 0.231729 |
| ZBTPFTLDGWUGCW  | CN1CCN(CC2=C(OC(=O)C3=CC=CS3)C4=C(C=CC=N4)C(Cl)=C2)C    | 0.236591 |
| ZBUFFWHKOVJHW   | COC1=C(OC)C(OC)=C(CN2CCN(CC2)C(=O)C3CCC(CNS(=O)(=O)C4   | 0.241472 |
| ZBZQCRFWASEUCI  | COC1=CC=C(C=C1)C(=O)NNC(S)=NC(=O)C2=CC=CS2              | 0.222673 |
| ZCOHOUIKFBCXOF  | COC1=CC(=CC(=C1OC)OC)CSC2=NN=N[N]2C3=CC=C(C)C=C3        | 0.265188 |
| ZDVMNCRUFXKDP   | COC1=C(CNC(=O)CC2=CSC(NC(=O)NC3=C(OC)C=CC=C3)=N2)C=     | 0.227433 |

|                 |                                                            |          |
|-----------------|------------------------------------------------------------|----------|
| ZDXDTRDQJPEQRA  | CC1=CC=C(C=C1)[S+][([O-])=O]C2(CCCC2)[S+][([O-])=O]C3=CC=C | 0.251796 |
| ZDJZTQJMGWRFBP  | FC1=CC=C(C=C1)C(NC(=O)C2CCN(CCOC3=CC=C(Cl)C=C3)CC2)C       | 0.224153 |
| ZEMAHOYXOAHHGN  | CC(C)CN1CCN(CC2=CC=C(C)S2)CC1CCO                           | 0.231621 |
| ZFAVZYVAYDNLNT  | COC(=O)C1=CC(NC(=O)NC23CC4CC(CC(C4)C2)C3)=CC=C1            | 0.241076 |
| ZFHBIKVGKIVQB   | CCOC(=O)C1CCN(CC2=CC(OCC3=CC=CC=C3)=C(OC)C=C2)CC1          | 0.239505 |
| ZFTWMJHRJKDXSR  | CC(N(C)CC(=O)NC1=C(Br)C=CC=C1)C(=O)NC2=CC=C(C=C2)C#N       | 0.262513 |
| ZGIUFOVBQWVHDX  | CCOCCN1CCN(CC1)C2C3=C(CSC4=C2C=CC=C4)C=CC=C3               | 0.291077 |
| ZGSQBSCXVDPEMV  | CN(C)CCOC1=CC2=C(C=CC=C2)C=C1                              | 0.224761 |
| ZGWMOSSZJKBYAW  | CN(CCCNC(=O)C1=CN=C(\C=N\O)C=C1)CCN(C)CC2=CC=CC=C2         | 0.224946 |
| ZGWXCNXAALTBR   | CC1=CC(N=C(S)NCCSC2=CC=C(Cl)C=C2)=C(C)C=C1                 | 0.233804 |
| ZHBZKSPOQFXRSY  | C=CCNC1=NC(=NC2=CC=CC=C12)N3CCCC3                          | 0.229569 |
| ZHILCVPERMUCCT  | C=CCN(CCOC1=C2C=CC=CC2=CC=C1)CC=C                          | 0.24662  |
| ZHRFLBVUJAQJHO  | COC1=CC=C(OCCN2CCN(CC2)S(=O)(=O)C3=C(C=CC=C3)C(F)(F)F      | 0.241299 |
| ZHXZWDYFYZQMN   | CCCCN(C)CCNC(=O)C1=CC2=C(S1)N(C)N=C2C3=C(F)C=CC=C3         | 0.226072 |
| ZIDPTDWLCMNPFO  | FC1=CC=C(C=C1)C2=C(C=NN2C3=CC=CC=C3)S(=O)(=O)C4=CC=C       | 0.258907 |
| ZIDVFGTVNOAXTE  | COC1=C(OCCOCCN(C)CC2=CC=CC=C2)C=CC(C)=C1                   | 0.232924 |
| ZITAWLJLIBKOH   | CC1CCN(CCOC2=CC=C(C=C2)C(=O)C3=CC=CC=C3)CC1                | 0.230691 |
| ZJLXFJDCINNRNW  | CN1C(Br)=C(Br)N=C1S(=O)(=O)C2=CC=C(C=C2)[N+][([O-])=O      | 0.237302 |
| ZJZRYLBMXBZUGD  | COC1=CC=C(C=C1)N2CCN(CC3=NC(=NO3)C4=C(Cl)C=C(Cl)C=C4       | 0.222332 |
| ZKBVDJKPVBCIEC  | CC(C)(C)CNC1=C(C=CC=C1)N2CCOCC2)[N+][([O-])=O              | 0.23567  |
| ZKMJZXOMSGVIQP  | [O-][N+]1=C2CCC3=[N+][([O-])N(N=C3C2=NO1)C4=C(Cl)C=CC=C4   | 0.237064 |
| ZKRWGPGVLZYPQJ  | CC1=NC2=NC=NN2C(=C1)N3CCN(CC3)C4=NC5=C(S4)C=CC=C5          | 0.2231   |
| ZKWRDHCBHIAZKI  | COC1=CC=CC(=C1)CN(CC2=CC=CO2)C(C3=CC=C(F)C=C3)C4=NN        | 0.235664 |
| ZKZWUEUAOWRWKC  | CN1CC2=C(N=C(SCC3=CC=CC=C3)C(=C2CC1(C)C)C#N)N4CCOC         | 0.224863 |
| ZLAZENKFQYTDGL  | CCOC1=CC=CC(=C1)[N]2N=NN=C2C3=CC=C(OC)C=C3                 | 0.249213 |
| ZLPGMNPGWZWWCLN | FC(F)SC1=CC=C(C=C1)N=C(S)N2CCN(CC2)C3=NC=CC=C3             | 0.24509  |
| ZLTYBEKAYYHILM  | ClC1=CC=C(C=C1)S(=O)(=O)NCC(NC2=CC=CC=C2)C3=CC=CC=C3       | 0.253751 |
| ZMGHADYRVNWWLD  | CC1=NN2C=C(C=NC2=C1Cl)C3=CC(Cl)=CC=C3                      | 0.222776 |
| ZMGNVVUFDUOJQI  | COC1=CC(=CC=C1)N=C(S)N2CCN(CC2)C(C3=CC=CC=C3)C4=CC=        | 0.244555 |
| ZMWKFSKLWQPAOQ  | CCN1CCN(CCOC2=CC(OC3=CC=CC=C3)=CC=C2)CC1                   | 0.271432 |
| ZNFQWIJKUZYKJ   | CCOC(=O)C2(CCOC1=CC=CC=C1)CCN(CC3=CC(OC)=C(F)C=C3)C        | 0.293047 |
| ZNFUABFFPMZGHF  | COC1=C(Br)C=C(C=C1)C2=CN3C=C(C)C=CC3=N2                    | 0.231774 |
| ZNPYASUNUPFMLC  | [O-][N+](=O)C1=CC=C(C=C1)N2CCN(CC3CCCC3)CC2                | 0.247842 |
| ZNQJZQNOZIAORO  | CCN(CC)C1=CC=C(C=C1)C2=C(C#N)C(OC)=NC(N)=C2C#N             | 0.232027 |
| ZNQPBWPWNXLKKI  | OCCCN1C2=CC=CC=C2NC3=NN=C(C=C13)C4=CC=CC=C4                | 0.244288 |
| ZNZUODPKZHQQOI  | COC1=CC=C(C=C1)N2CCN(CC2)C(C3=CC=CC=C3)C4=NN=N[N]4         | 0.226943 |
| ZODNOJAQEVPKOW  | CCN1CCN(CCCNC(=O)C2=CC3=C(S2)C4=C(NC3=O)C=CC=C4)CC         | 0.234911 |
| ZOEGUHLNLRALRO  | CC1=CC(C2=NNC=C2CN3CCCC(CO)(CC4=C(C)C=CC=C4)C3)=C(C        | 0.264631 |
| ZOGOKWMZPSMNOR  | C\N=C(/S)N1CCN(CC1)C2=CC(Cl)=C(Cl)C=C2                     | 0.227522 |
| ZOJJVSZFIYSTHC  | COC1=CC=CC(OC)=C1OCCCN2CCN(CC2)C3=C(OC)C=CC=C3             | 0.277358 |
| ZOQSXBXNFXEJQF  | S=C1SCN(CC2=CN=CC=C2)CN1CC3=CN=CC=C3                       | 0.228235 |
| ZORVKOINJWFODK  | COC1=CC=C(C=C1)C2CC(=NN2C(=O)C3=CC(=C(Cl)C=C3)[N+][([O-    | 0.23357  |
| ZOSTWKQFNTANW   | O=C(NC1=CC2=C(C=CC=C2)C=C1)C(C3CCCC3)C4=CC=CC=C4           | 0.238594 |
| ZOZZSEQNQKZZGQ  | CC1=C(C=CC(OCCCN2CCN(CC3=CC=CC=C3)CC2)=C1)[N+][([O-])=     | 0.230648 |
| ZPOIPOCHHDZVHE  | CCN1CCN(CC1)C2=C(C(N)=NC(NC3=CC(C)=CC=C3)=N2)[N+][([O-     | 0.256342 |
| ZPVOJBNNZLIFED  | ClC1=CC=C(C=C1)N2CCN(CC3=CC=C(Br)O3)CC2                    | 0.244694 |
| ZQIAXDULHBLZJE  | CC1=C(C=O)C=CC(=C1)N(CCCl)CCCl                             | 0.267939 |
| ZQJXZFKBPDFCDC  | COC1=C(NS(=O)(=O)C2=C(C=CC(NC(=O)C3=CN=CC=C3)=C2)N4C       | 0.234906 |

|                |                                                        |          |
|----------------|--------------------------------------------------------|----------|
| ZQQBASAIFGTMSU | COC1=CC(=CC(OC)=C1OC)C2=NN=C(O2)C3=CC=C(C=C3)N4CCO     | 0.272232 |
| ZRHSCMXFOILLCB | CC1CCCC(NCC(O)COC(C2=CC=C(F)C=C2)C3=CC=C(F)C=C3)C1C    | 0.223447 |
| ZRPJIHBJJOQXBX | SC(=NC1=C(OC2=CC=CC=C2)C=CC(Cl)=C1)N3CCN(CC3)C4=NC=    | 0.282632 |
| ZSCIEDIHFGRRIK | COCCCNCCOCCOC1=C(C=CC=C1)C2=CC=CC=C2                   | 0.24549  |
| ZSHCLQJTSSARQ  | CC1=CC(=CC=C1)N2C(SCC3=CC=C(C=C3)C#N)=NN=C2C4=CNC5     | 0.224595 |
| ZSNQFQRLXCCVTP | CC1=C(CN2CCCC(C2)C(=O)NCCCN3CCOCC3)N=C(O1)C4=CC=C(     | 0.229227 |
| ZTWXGQRMVGRICE | CN(CC1=CN(C)C2=C1C=CC=C2)C(\S)=N\C3=CC=C(C)C=C3        | 0.257878 |
| ZTZHQEVUDFQCKW | CC1=C(C=CC=C1)C2=C(N=CO2)C(=O)NC3=C(NC(=O)C4=NC=CC=    | 0.236923 |
| ZUFBFBOOLBCCCM | CCCCNC(S)=NC1=CC2=C(C=C1)N=C(C=C2C)N3CCN(CC)CC3        | 0.251118 |
| ZUGMTXDCVONBCH | CN(C)CCNC=C(C(=O)NC1=CC=C(Cl)C=C1Cl)C(=O)NC2=CC=C(Cl)C | 0.225081 |
| ZUJRILFEGPWBCR | COC(=O)C1=CC=C(NC(=O)NC2=C(F)C=CC=C2)C=C1              | 0.251432 |
| ZUVIQGVPQYCQRJ | CC1=NC(N2CCN(CCOC3=CC=C(Cl)C=C3)CC2)=C(C#N)C(C)=C1     | 0.248173 |
| ZUWVDYUCNFGIJG | COC1=C(OCC2=CN=C(Cl)C=C2)C=CC(CNCCC3=CC=CC=C3)=C1      | 0.262597 |
| ZVFNTPHUFQNXLT | CCCC(N1CCN(CC1)C2=CC=CC=C2F)C3=NN=N[N]3C4CCCC4         | 0.237118 |
| ZVGLSKOEGXKKZ  | NC1=NC(=NC2=CC=C(Br)C=C2)C3=C1C=CC=C3                  | 0.229685 |
| ZVHFPVLLVIJCMW | CC1=CC(OCC(O)CN2CCN(CC3=CC4=C(OCO4)C=C3)CC2)=CC(C)=    | 0.243523 |
| ZWFDVHHCQGZZQC | CN1CCN(CC1)C2=C(NC(=O)CSCC(=O)NC3=CC(C)=CC=C3)C=C(Cl)  | 0.242685 |
| ZWRGSLGTWZRDMP | NC(S)=N\N=C1\C2=C(C=CC=C2)C3=C1C=CC(Br)=C3             | 0.24359  |
| ZWWBESRHLHFGRU | COC1=CC=C(C=C1)C2=C(C)SC(NC3=NCCCC3)=N2                | 0.255238 |
| ZXVNJVRAbsCRGU | OC1=C(C=CC=C1)C2=NNC(=C2)C3=CC=C(Cl)C=C3               | 0.235764 |
| ZYCASFPOFAJMAJ | COC1=CC=C(C=C1)C2=C(C)N3CC4=C(C=CC=C4)C3=N2            | 0.226015 |
| ZYKOBPNQNWRTTE | COC1=CC=C(CCNCC2=C3C=CC=CC3=CC=C2OC)C=C1               | 0.258682 |
| ZYLLLUVNOGFKZ  | CCN(CC)CCNC(=O)C1=CC2=C(S1)C=CC(Br)=C2                 | 0.261627 |

| <b>BABM-M</b> | <b>BABM-S</b> |
|---------------|---------------|
|---------------|---------------|

|            |          |
|------------|----------|
| 0.36470364 |          |
| 0.3251878  |          |
|            | 0.389915 |

|            |  |
|------------|--|
| 0.32131782 |  |
| 0.33705331 |  |

|            |  |
|------------|--|
| 0.32213663 |  |
|------------|--|

|            |  |
|------------|--|
| 0.36332427 |  |
| 0.35127862 |  |

|            |           |
|------------|-----------|
| 0.39088162 | 0.3867422 |
| 0.33674681 |           |

|            |           |
|------------|-----------|
| 0.34956315 | 0.3645064 |
|------------|-----------|

|            |           |
|------------|-----------|
| 0.34781199 | 0.4137156 |
|------------|-----------|

|            |          |
|------------|----------|
| 0.34882816 | 0.358276 |
|------------|----------|

|            |           |
|------------|-----------|
| 0.33444525 | 0.3834894 |
|            | 0.3970641 |

|            |  |
|------------|--|
| 0.39757965 |  |
|------------|--|

|  |           |
|--|-----------|
|  | 0.3678416 |
|--|-----------|

|  |          |
|--|----------|
|  | 0.370764 |
|--|----------|

|            |  |
|------------|--|
| 0.32951119 |  |
|------------|--|

0.33956163

0.34197302

0.34330711

0.38148074

0.33126945

0.35611606

0.37427774

0.41923552 0.4505376

0.34499331 0.3905498

0.33590773

0.35772668 0.4046113

0.36403304 0.4469702

0.37568343

0.36932325 0.3624556

0.3681695

0.3887914

0.4675798

0.3716502

0.36164418 0.4395286

0.361521

0.3762809

0.4092127

0.3845665

0.3721033

0.36427991

0.4291234

0.32056898

0.3576683

0.464778

0.464422

0.4294417

0.4521599

0.4154454

0.3701603

0.3752289

0.32002098

0.4062715

0.35471723

0.388236

0.3926649

0.3741585

0.4241589

0.35765545

0.33546875

0.3818975

0.3608734

0.35258276

0.3593588

0.3939585

0.3680068

0.33322827

0.32999228

0.34272468

0.32562592

0.33879237

0.42613337 0.4225398

0.3601118

0.4007496

0.32584333

0.34118501

0.35935002 0.397627

0.32627151

0.3824778

0.33505866

0.3613993

0.39250339 0.3721592

0.32237707 0.4275308

0.32697205

0.33010874

0.34236424

0.3736209

0.40122127 0.3938006

0.33525096

0.33303465

0.38693884

0.39166162 0.4122069

0.366357

0.4794599

0.3667653

0.4459029

0.447609

0.32623604

0.3207934

0.3611523

0.36993775

0.39798445 0.3911138

0.4377685

0.402602

0.4594986

0.4148076

0.3680162

0.4826018

0.4060193

0.35268763

0.3658916

0.3599076

0.4007173

0.37535398

0.32281133

0.38448947

0.3283007

0.3960616

0.3818659

0.36455308 0.3662863

0.34802214 0.4073425

0.3857247

0.3896804

0.370754

0.34861745

0.3250628

0.35697451 0.3812825

0.34624853

0.34633256

0.34801274 0.3613279

0.32766921

0.37631468 0.388969

0.35027411

0.38766864

0.32361334

0.35532038

0.35497496

0.43160151 0.4516096

0.33911043

0.39962606

0.32915136

0.32646276 0.3721357

0.38971627

0.33070501

0.37494569

0.3419699 0.3653082

0.36480396 0.3793695

0.32140551

0.3727256

0.36486163 0.3575626

0.38093132

0.3254844 0.37294

0.32046386

0.33227692 0.3773801

0.42489441 0.3986699

0.32756984

0.38212446

0.3629006

0.38224545 0.3864249

0.36526763

0.33555756 0.4265302

0.36942334 0.3990014

0.34452298

0.32446737

0.37258459

0.32906673 0.3736757

0.33928214

0.32824776 0.4627609

0.3798684

0.35330703

0.3242366 0.4020331

0.33186955

0.39382824 0.4522523

0.36468599

0.33905229

0.4070957 0.4319825

0.34737159

0.34517958

0.35870946

0.38650197 0.3650265

0.37950843 0.3716563

0.33777065

0.32313972

0.36862519

0.35873875 0.400581

0.40496886

0.32159362

0.35666582

0.35081953 0.3740331

0.43380465 0.4148738

0.31835961

0.38056927 0.4476188

0.3608073

0.32165498 0.4224108

0.414553

0.38324318 0.4213581

0.39453532 0.4401225

0.34675193

0.32925643

0.36585765 0.4040572

0.33885286

0.3925582 0.3829121

0.31898129

0.40347647 0.3593354

0.45314071 0.4769743

0.36607077 0.3662914

0.36493807 0.4035533

0.3896729

0.3884947

0.418732

0.34157135 0.4261323

0.3655837

0.34508171

0.37493233 0.4300648

0.33811454 0.3854114

0.3624031

0.33214865 0.3853524

0.3857189

0.3907922

0.32786992 0.4417861

0.35916802 0.3827583

0.387538

0.34362358

0.3803595

0.34295388 0.4094195

0.3694472

0.3958521

0.34527271 0.4170716

0.3790648

0.34567381 0.3624213

0.33203575

0.41297508 0.433932

0.38766057 0.3824046

0.31902454

0.3350331

0.39425049 0.4267569

0.35571378 0.3593871

0.37071082

0.3761082

0.3765972

0.3481192

0.37760898 0.460685

0.32914927 0.4298976

0.32218511

0.33088998

0.35803133 0.3958686

0.32995625

0.34574554

0.36117607

0.33255494

0.35246545

0.35490382

0.36762854

0.38259872

0.34124285

0.37543355

0.38174561

0.33409686

0.33890046

0.32098877

0.31855257

0.36306994

0.37857585

0.33265674 0.3765733

0.33123394

0.3615155

0.3578724 0.3612363

0.39296612 0.4094196

0.3504121

0.32352785 0.3633363

0.43353953 0.409909

0.35377178 0.448444

0.40138159 0.3872027

0.32618716 0.366504

0.34113079 0.3669396

0.3860031 0.3781864

0.36481432

0.45998665 0.4279301

0.33335704

0.40504905 0.4638546

0.31953152 0.3972032

0.39410086 0.4571896

0.33485304 0.3724802

0.33304776

0.33967837

0.38937447 0.3915036

0.39205021 0.4172095

0.3652947

0.3601806 0.4481337

0.41787038 0.4225962

0.35497904

0.32448088

0.4365717 0.413331

0.34907126

0.37234425 0.466076

0.40397634 0.4600143  
0.37699237 0.4149786

0.37867952  
0.32882297 0.3606499

0.39328429  
0.39514734 0.4228677  
0.35229378 0.3647025  
0.34010766  
0.32855501

0.34034922 0.3831551  
0.32861858

0.39750515 0.4018395

0.3467812 0.3970296

0.3471454 0.3658388  
0.34473281 0.3977086

0.33149154

0.37706821  
0.43714024 0.4300154

0.3336784

0.34058516  
0.38491132 0.4341443

0.32788919

0.32780702  
0.32539272

0.36215156

0.37096103 0.3580379  
0.37159026  
0.38071028  
0.38070454  
0.36879131 0.3699948  
0.39536137  
0.35163438  
0.38930027 0.3697737  
0.36160645  
0.36970329 0.4041603  
0.3782501  
0.42198279 0.3817537  
0.34634762  
0.33885565  
0.32512018  
0.353558 0.3580612  
0.35281447  
0.33381706  
0.34793313  
0.33911122 0.3927685  
0.34304637  
0.34215943  
0.33459239  
0.36073847 0.3859373  
0.39992744 0.3868566  
0.40098867 0.3839094  
0.35832631  
0.41490689 0.3852009  
0.42988116 0.4308701  
0.39727636 0.4030841  
0.37208647 0.3964434  
0.4203214 0.4467376  
0.36858917  
0.32895731  
0.34012753  
0.34559897 0.3843248  
0.4336889 0.3747306  
0.37871481 0.3573269  
0.42895846 0.3921796  
0.37183503

0.33033681

0.32455091

0.38940291 0.4043879

0.34997467 0.3813824

0.32977713

0.38623986

0.34111197 0.3685307

0.32582438

0.33917873 0.3603928

0.3436543

0.35298111

0.37694421 0.3925361

0.3974708 0.3690865

0.33187816

0.33807652 0.3712312

0.33215337

0.37163457 0.378875

0.3777519 0.3686734

0.33172067

0.33325067

0.35900331

0.3203897

0.41280216 0.4091525

0.35901242 0.4101135

0.37526174 0.3720776

0.33677175

0.3941067 0.4795016

0.32974298

0.32985596 0.3965156

0.35957638

0.3923009

0.35490504

0.33741768

0.39376626 0.4290323

0.34930033

0.36943693 0.3751365

0.40650181 0.4281144

0.34348738 0.3670557

0.42170168 0.4250295

0.35789614 0.3643001

0.36279624

0.37448685 0.3689269

0.32457728

0.43035331 0.4169282

0.3398558

0.34417751

0.32764329

0.3855066 0.4092294

0.33695755

0.3434571

0.35827727

0.31955134

0.34913162

0.39493914 0.3909498

0.38170188 0.3752627

0.33589038

0.35361284

0.36724588 0.4051528

0.36479388

0.33671349

0.35756276

0.36653911

0.32164323

0.32732696

0.34734758 0.4374084

0.38912503 0.3845339

0.35291306 0.3593391

0.33428463

0.35055148

0.38427044

0.32107989

0.34948699

0.33164092 0.3823601

0.41184039 0.4088705

0.34904505

0.38005479 0.3915906

0.3540149

0.38261355 0.38459

0.34324605

0.35532052

0.3995751 0.3579502

0.42470512 0.3980097

0.32764838

0.37635372 0.3823702

0.37469311

0.39696942 0.4031934

0.32909198

0.37788441

0.37615356 0.392346

0.4147363 0.3594292

0.34826215

0.34858708

0.36014811

0.33006202

0.38331233

0.33281744

0.33143704

0.36807677 0.379884

0.37727685

0.36623322

0.32971982

0.3683625

0.32784129

0.34094395

0.35245232

0.39029975

0.39991852 0.3577332

0.35680915

0.35274686 0.3661617

0.39301781 0.4001974

0.39191213

0.36052661

0.38734907

0.37207911 0.4274479

0.32037114

0.34427098

0.34097419

0.33616692

0.33553995 0.3723806

0.3338732

0.37900889 0.3650086

0.36183658 0.3848532

0.37461406 0.3862356

0.34103184

0.33129251

0.37206558 0.3674547

0.33526252

0.41027459 0.3617027

0.46129931 0.3907869

0.43606624 0.4480148

0.37094598

0.34016293

0.3964312

0.35056396

0.3243816

0.32830941

0.33924082

0.36058694 0.3637577

0.4069089 0.4240102

0.43667058 0.3719048

0.38821936 0.3722739

0.39023555 0.4039318

0.37535827 0.3806165

0.34933233

0.32031974

0.34504417

0.42149944 0.4467262

0.330775

0.36420313 0.3830812

0.33912541 0.3732772

0.36945411

0.34928079

0.33211484 0.3666501

0.38767529 0.418596

0.35123287 0.4031798

0.37585465 0.3823491

0.37419166 0.3588734

0.36294996 0.3890706

0.38614611 0.3792925

0.34112767 0.3623909

0.38943271 0.3628684

0.35011481 0.3957128

0.37002624

0.35858265 0.395361

0.32160375

0.36689628

0.44047669 0.3638204

0.3423212

0.35363381 0.3822156

0.32136632

0.38514377 0.396815

0.38774543

0.33565194

0.35946738

0.33143585

0.32763014

0.36219477 0.3607306

0.39905611 0.3741539

0.3406052

0.35354208 0.388801

0.33702814 0.3592522

0.33250509

0.3770961 0.3699595

0.41104922 0.4007819

0.35080274

0.35730836

0.33421584

0.45599613 0.414178

0.39936581

0.35151696

0.37440545 0.3721644

0.32195392

0.33880833

0.35661626

0.38532865 0.3851733

0.34753997

0.34645098

0.34729079

0.35090418 0.3582826

0.35100762

0.32459894

0.3767968 0.4044789

0.36022327

0.3601537

0.3541316

0.39265646

0.35706368 0.3636213

0.37667866 0.3852111

0.34171368

0.35708622 0.3648596

0.34967662 0.3879741

0.32480927

0.37243749 0.3946298

0.40305794 0.3688099

0.34790886

0.435851 0.4086116

0.34141636

0.32654807

0.36823465

0.36158682

0.34707917  
0.38584489 0.4098029

0.40645873 0.3672535  
0.39058623 0.3592824  
0.36214543 0.3884744  
0.36912266  
0.39220078 0.3892935

0.32389309  
0.37000474 0.3754326  
0.34564397

0.3406177  
0.42090517 0.4165046  
0.42159738 0.4510891  
0.367593 0.3778491  
0.45993517 0.4214138  
0.35181581 0.4017459  
0.36688547 0.3784617  
0.32964834 0.3604056

0.36389491

0.32068281  
0.41134009 0.3738326  
0.38595055  
0.39439168 0.3937066  
0.37325707  
0.36017842  
0.34296001  
0.412053 0.4224288  
0.35026335  
0.36088883 0.3754894  
0.41100779 0.4150184  
0.37299265 0.362562  
0.37296437 0.3580992  
0.39490398

0.37351407  
0.41204406 0.3644992  
0.34305457  
0.35244489  
0.33980461  
0.42304889 0.4065864  
0.36267534  
0.41736734 0.3964106  
0.31827604

0.33924018

0.3953704 0.4111146

0.3988571 0.3807071

0.35721909

0.32508378

0.3996353 0.3731505

0.37780314

0.42245236 0.438025

0.43682911 0.4059505

0.42629543 0.4000825

0.38440617 0.3772274

0.38554228

0.36422547 0.3927882

0.33539257

0.35225167

0.32534385

0.32243143 0.3723284

0.33761106

0.38409762 0.4042918

0.3432477

0.31990733

0.32731694

0.34010687

0.33245868 0.3976648

0.39548003 0.361035

0.33111044 0.3612533

0.32280778

0.35094559

0.33199169

0.35676334 0.4090028

0.32849699

0.3353126

0.33394038

0.40548877 0.4718643

0.37982946 0.3948558

0.39730913 0.4329985

0.40209546 0.3738464

0.3379567

0.31918267 0.3731986

0.31925515

0.32991745

0.3681494

0.31965169

0.39468663 0.3881215

0.4085642 0.3760889

0.36539285 0.365871

0.32690486 0.3756713

0.37400719 0.3945479

0.38469542 0.3858409

0.3971616

0.33756075

0.34223291 0.4238119

0.335353

0.32036183

0.34494005

0.35741411 0.3721474

0.35137428 0.4177654

0.39471093 0.3678477

0.319236

0.41826748 0.425884

0.36777441 0.4495853

0.37668267

0.41047149 0.4315921  
0.32447513  
0.32496884  
0.36691162  
0.32190635  
0.33411964

0.39457099  
0.32059539

0.33178582  
0.3190058

0.32379868  
0.3592725  
0.36546029 0.3597437  
0.32076334

0.34454711  
0.33559578  
0.39458456 0.3714941  
0.35112383 0.3619447

0.50087491 0.4577281  
0.35519824 0.4122637  
0.38163802  
0.39402858 0.3936364

0.33172027  
0.52015146 0.4871892  
0.3824059

0.36832597 0.3682011  
0.37743562

0.39141102 0.3751383  
0.32996489  
0.33367458

0.34336773

0.33687784 0.3965031  
0.35590542 0.3749013

0.37279106 0.3880516  
0.34890292  
0.35526763  
0.31954162  
0.33671608  
0.40246032 0.4052023  
0.34984463 0.3575033  
0.39595329 0.4191107  
0.38546537  
0.3323688  
0.36832699 0.416753  
0.44951339 0.4147085

0.32526354  
0.39786601  
0.36770829 0.4389124  
0.32459236  
0.32553456  
0.33299063

0.41015706 0.3882181

0.3795044  
0.32187825  
0.35921055 0.4165748  
0.37424826 0.3861172  
0.34825139  
0.33397626  
0.38676743 0.4371228  
0.33624765  
0.34406825 0.3901784

0.3555169  
0.38316104 0.3760952  
0.33030563  
0.35653306

0.4437827 0.4312447  
0.33221081 0.3852116  
0.38522851 0.4060982  
0.47406797 0.5318383  
0.33577378

0.35001334

0.32422425

0.33487901

0.39891774 0.4309497

0.35173877 0.3629482

0.360289

0.33225248

0.3255656 0.36513

0.32963424

0.34812381 0.3886889

0.38242669 0.3573589

0.39055895 0.3655169

0.34549078

0.4159469

0.36141761 0.42563

0.37645883

0.34266656

0.36234537 0.3672284

0.34876633 0.4026143

0.32973554

0.41257652 0.399802

0.39083478 0.4097884

0.38949963 0.3938977

0.36537968 0.4231841

0.34847995 0.3616209

0.39980207 0.3955193

0.36292718 0.394943

0.32059489

0.3514685 0.380941  
0.41837307 0.3589175

0.32442708 0.4022855

0.34533143

0.37328549 0.4321044

0.40663976 0.3917138  
0.32256936

0.39476628 0.391543

0.34036678 0.4334653

0.38433445 0.363122

0.37017772 0.4067585

0.35772051

0.36754005

0.41357081 0.3789584

0.37936109

0.35822719 0.3765538

0.36952006 0.4245576

0.36275815 0.37284

0.33897654 0.3917712

0.38184511 0.4286492

0.35680618 0.3765354

0.37166972 0.4041088

0.34290298 0.4225456

0.37016954 0.4135859

0.33638041 0.376381

0.40054094 0.3580076

0.35570025 0.367233

0.33737889

0.35102165 0.4592614

0.34263632

0.39024729 0.4093271

0.33590331 0.3579945

0.35687369 0.3647434

0.33777296

0.37783498 0.4411986

0.41143356 0.4162254

0.34632819

0.34400701 0.371032

0.36573952 0.3737723

0.35858336 0.3656373

0.3920105 0.4370005

0.32311915

0.3398608

0.35826489

0.42528537 0.4011207

0.35655359

0.41619245 0.5028892

0.38348289 0.3865637

0.32880409

0.35096361 0.3924573

0.40587583 0.4161181

0.32578464 0.3700207

0.36671392 0.3673337

0.32063653

0.3541244

0.37932693 0.3920428

0.32091204 0.4104046  
0.37656851 0.384624

0.37713761 0.3778506

0.38850136 0.4137903  
0.43621533 0.4127397  
0.38802947 0.4007675  
0.36699986 0.4003476  
0.39654174 0.3890092  
0.33938899 0.4213667

0.3583578  
0.32235055 0.3837045

0.32992309

0.36803497

0.33894217 0.3829131

0.3706658

0.32546733  
0.34232896  
0.38774628 0.4039286

0.3573582

0.31934818 0.372282

0.34728491 0.3632924

0.32241791

0.36475545

0.36922222  
0.33389795  
0.35852945 0.373029

0.45372241 0.4409992

0.33677149  
0.43221892 0.4162072  
0.41281321 0.4074451  
0.39228432  
0.33001681  
0.41811764 0.3735472  
0.33511722

0.38668373 0.4087352  
0.32648575 0.3745877  
0.34006305 0.3853384  
0.34979883

0.39560351 0.377472

0.36517567 0.3955803  
0.34136075 0.3594417

0.35741391 0.3903133  
0.32857469 0.3822439

0.3612514 0.4226829  
0.3707004

0.34690505

0.41283668 0.4275916  
0.35470786 0.4215037

0.39160979 0.4203617

0.34464268

0.31930363

0.43056096 0.5165015

0.3581423 0.365805

0.35755798 0.3683713

0.3440557 0.3730713

0.3481068

0.32646276

0.35519362

0.32833609

0.35700433

0.36607968 0.3601076

0.34354315 0.4079288

0.39847485 0.3870141

0.4027818

0.33313967 0.4059454

0.32101421 0.3715474

0.31912018 0.3593333

0.38440988 0.3949701

0.40022317 0.3902925

0.3861713 0.4050078

0.412995

0.4124894

0.37871886 0.4042715

0.3516808

0.34606622

0.3675397

0.32086813

0.34112237

0.3744962

0.36120825 0.378576

0.36766973 0.4513259

0.4064428

0.3193691

0.40402453 0.3609596

0.39030704

0.383126 0.4064159

0.32650313

0.32835155

0.38898334 0.4551611

0.33123878 0.3644423

0.37815549

0.43629628 0.3981841

0.33043512

0.32728151

0.32344981

0.36888082 0.377103

0.34835796

0.34028375

0.33331892

0.34578331

0.32501357 0.373824

0.33663837

0.33431524

0.3790382

0.34878064

0.34556019

0.3278083

0.36318947 0.3658526

0.40180041 0.433154

0.35666816 0.4149347

0.4188405 0.3930612

0.32722166

0.39943877 0.3773387

0.32621551

0.33709216

0.42410649 0.3943077

0.32973014

0.33863221

0.36873621

0.39084511 0.3874148

0.39656356 0.4181178

0.34198276

0.33722439

0.34735669 0.3990448

0.35579317

0.38690107

0.38094232 0.3916516

0.33683755

0.36172716 0.3963799

0.37175219 0.3628594

0.33380155

0.3483168

0.35171005 0.3589711

0.34142323

0.33249138

0.35410056 0.3606936

0.33698966

0.32421855

0.32611208 0.3703114

0.3834387 0.4022753

0.32815639 0.3961121

0.34456655

0.3991207 0.4087069

0.33364611

0.32456163 0.380426

0.32929369

0.3865107 0.4037333

0.38580222 0.4250319

0.34986377 0.3719657

0.34873269

0.35926333 0.361568

0.36963823 0.3618383

0.32169282

0.35019745 0.3721378

0.40970074 0.3723708

0.39004949 0.3596739

0.32667767

0.33406885 0.3905366

0.38017815

0.39403865 0.3659125

0.33010354

0.33092394

0.36142818

0.33979625

0.36275913 0.3762102

0.41133525 0.3742809  
0.3250829

0.33161852  
0.40563782 0.3712322

0.32373342 0.3803333

0.4073299 0.3974191  
0.34069543 0.3596947

0.32551939 0.3659111

0.33589636 0.3575774

0.33267546  
0.33484597

0.35554492 0.3969713

0.34469885

0.36229519 0.3611156  
0.32912222 0.4207165  
0.34476536

0.45711589 0.4619808  
0.31933286

0.3937908

0.38428423 0.3676038

0.36662731 0.3917081

0.33443153 0.3853444

0.32013971 0.3770941

0.32094139

0.34121777 0.375475

0.42478754 0.5060015

0.3810183

0.38369377 0.4466921

0.31925952

0.34454567

0.34208827

0.32092991

0.35733582

0.32084349

0.36198104 0.415521

0.38165281

0.33258207

0.3230084

0.31867124

0.3546322

0.34658002 0.3579624

0.31967977

0.39006405 0.4292965

0.37263915

0.3660827

0.32958028 0.3740338

0.36639587

0.36637047

0.32598485

0.33865753 0.4000661

0.33572258

0.39344766 0.4024236

0.33766055

0.36461234 0.3856232

0.4141591 0.3995982

0.32477668 0.362021

0.36425293 0.4148188

0.37829571

0.31880689

0.35380865 0.3840645

0.37335034 0.3702295

0.3684959 0.3779623

0.3717654

0.43920267 0.3606471

0.33585923 0.3594665

0.35997696 0.428001

0.38623849 0.433645

0.33680985

0.33165896

0.4042092

0.34977697

0.34395365

0.4044729

0.35193271 0.3726124

0.33734292

0.35381716

0.37100225 0.4164376

0.32138279

0.33197462

0.38594803

0.33560213  
0.3597742  
0.39765944  
0.33531089  
0.37832352 0.3995461  
0.35726925  
0.44992528 0.4335159  
0.37167209  
0.33540781  
0.36527737

0.3808709  
0.41007757 0.4046471  
0.36883369  
0.32845233

0.327653 0.3572948

0.34228233 0.3902385  
0.32018871 0.3601159  
0.37240034 0.3997139  
0.33921805 0.3763059  
0.34742037 0.4163153  
0.37419412 0.3898757  
0.4004342 0.4501689  
0.3341841

0.3928496 0.4001806  
0.38182224 0.410697  
0.44774697 0.3839427

0.40674342 0.414472  
0.37838223 0.3845109  
0.380753

0.3494193

0.45826733 0.465071  
0.34942938 0.3887188

0.33791582 0.3834877  
0.3602209  
0.31953247

0.4103388 0.3929064  
0.31926973

0.39640658 0.4027338

0.33618423 0.3668663  
0.32841558  
0.32270082 0.3870954

0.33445614 0.3625568  
0.36012451 0.3595054  
0.32956243  
0.32610853 0.4148465

0.34927647  
0.31905002

0.37205229 0.3945537  
0.44977521 0.4014585

0.40541235  
0.32306122 0.3781309

0.4479041 0.3974507  
0.32538386 0.3991885

0.42136677

0.45391658 0.4296635  
0.32693501

0.42374826 0.4087211  
0.32478897 0.3659423

0.40454297 0.3858518  
0.3781308

0.32373379

0.34092304

0.37785538 0.4284716

0.4711848 0.4284751

0.41790388 0.4036633

0.35143077

0.37454489 0.4104572

0.34340488 0.3923428

0.41079113 0.3582234

0.3806245

0.38927435 0.4312139

0.35319964 0.3927541

0.3200697 0.3628784

0.35892018

0.36855739 0.3590826

0.41398074 0.3763806

0.37148505 0.416112

0.36805877

0.35027639

0.34928852 0.377819

0.33703569

0.34690879

0.32722997 0.3611464

0.36091259

0.32172089

0.36033833

0.390728

0.35157934 0.3760245

0.34220981

0.35775608  
0.36889159  
0.39029331  
0.37778977 0.4220081  
0.39804061 0.3970442  
0.37753194 0.3752901

0.33256095  
0.32990906  
0.3226343

0.42078485 0.4300364  
0.34533485

0.34739407  
0.38258089  
0.32202814  
0.35561317 0.3834461  
0.33926479 0.3663105  
0.34351296

0.37098657  
0.3404925  
0.34301465 0.3702178  
0.34526724

0.34250722

0.32151042  
0.36546252 0.3661405  
0.33575997

0.3815091

0.37854738

0.34765177

0.36221018 0.4126694

0.32509291 0.3694513

0.37756964 0.3700628

0.34901076 0.4361769

0.3689915

0.35254098

0.3829345 0.359231

0.37901159

0.33684595 0.3768292

0.33742889

0.3345204

0.333257

0.38983376 0.3774027

0.35208476 0.3911269

0.38753293

0.3410167 0.3743017

0.34477956 0.3622606

0.34764838

0.36499544 0.3790326

0.36282022 0.3741288

0.36819626 0.378551

0.34249368 0.3603276

0.33518845

0.44248687 0.4178057

0.34292042 0.3586821

0.33005958

0.35554741 0.4184494

0.33456887

0.3415996

0.34929911

0.33890075

0.31971057

0.49231996 0.4377522

0.4016862

0.31886663

0.39109959

0.32589904

0.35945397 0.3614867

0.35266777

0.37388725

0.36196934

0.40446074 0.4282939

0.413702

0.32751307 0.366873

0.33473427

0.31961964

0.42815431

0.37732092

0.40766307 0.3748536

0.38233481 0.4420472  
0.41445389 0.4394419  
0.42934131 0.3815954  
0.3408516 0.4032404  
0.32564673  
0.34343494 0.4054725  
0.39159007 0.4445307  
0.37967906 0.3996703  
0.40416776  
0.32517236

0.36547691  
0.34917524  
0.40686447 0.3696639  
0.36475125 0.4035141  
0.37060164 0.4141733  
0.34958872  
0.40900326 0.389643  
0.3810611  
0.35507511 0.3622884

0.36497138  
0.327019  
0.35210127

0.33761073  
0.38640518 0.3818977  
0.3204378  
0.34750037  
0.32111625

0.33003405 0.36276

0.3712981  
0.33593899 0.3641865  
0.4089166  
0.32195708

0.32042804

0.3405422 0.3798917

0.33997475

0.37387932 0.3859543

0.39444272 0.3947382

0.32000355 0.4080305

0.35701593

0.32410199

0.31871941

0.37704906

0.34282508 0.3856544

0.35914612 0.3751339

0.35205522 0.3699633

0.38444293 0.3744712

0.34329887 0.3596615

0.34427623

0.33209104 0.3763216

0.32670758

0.32277854

0.32629806

0.44365027 0.3647399

0.37256399

0.38449081 0.3687426

0.36681795

0.35433043 0.3868763

0.36113117 0.4128308

0.31984358

0.39787923 0.4627478

0.31827737

0.31845307 0.427381

0.40634124 0.3666659

0.35137744 0.3782159

0.32596738 0.4066124

0.41825418 0.4376831

0.35537868

0.33284659 0.4301071

0.33631869

0.4270335

0.3820965

0.4232789

0.3593501

0.36050973 0.3866354

0.3591638

0.33155926

0.33261977

0.33332435

0.32521886

0.4487373

0.4364063

0.3874201

0.32284711

0.3799811

0.4336301

0.4477999

0.4755845

0.4697467

0.4061062

0.33176794

0.4225652

0.31887058

0.33848562

0.34369134

0.33974794

0.3980186

0.3585193

0.4079476

0.3580608

0.37024728

0.36847726

0.32536622

0.34159987

0.3279442

0.33243133

0.37764794

0.32100438

0.33005655

0.3804089

0.32856288

0.35827827

0.37291083

0.33880743

0.36562361

0.33412749

0.32132654

0.32572054

0.33553026

0.32304056

0.32693741

0.32956197

0.32330458

0.37068291

0.33170159

0.40262897

0.36513397 0.373149

0.32714415

0.34090739

0.35472577

0.36836328 0.3609616

0.36767885

0.34060745

0.36862041

0.40781594

0.41614566 0.4014687

0.36841851

0.34862474

0.32076728

0.35841556

0.37070615 0.3673204

0.37397811 0.3959316

0.370957

0.32194786

0.34942902

0.35355224

0.33359373

0.32666359

0.34703796

0.34214982 0.3616253

0.36013596

0.39999037 0.4113881

0.33935052

0.39726988 0.3726649

0.36061255

0.34681117

0.32788617

0.3232185

0.34475506

0.33879588

0.35187687

0.36905425

0.41786028 0.3786254

0.37773985

0.39999762 0.3607206

0.31895895

0.37956585 0.3774312

0.34269577

0.33721835

0.33524915

0.36857333

0.34657722

0.33485671

0.3250303

0.42470262 0.3794569

0.32449885

0.36972697

0.3977778

0.35745854

0.35099278

0.32883968

0.38111784

0.35254005

0.35179229

0.3600352

0.42263941 0.3592102

0.34353551

0.33805248

0.35119452

0.34401281

0.37371415

0.35291763

0.39101809 0.3722102

0.3274737

0.32497322

0.33901588

0.33563039

0.34056458

0.4073077 0.3837048

0.35133513

0.4170888

0.34549349

0.37185293

0.35089525

0.35888086

0.38946585 0.4039568

0.31829986

0.37854965 0.3577124

0.34549039

0.33771706

0.32221414

0.38818686 0.386765

0.35624404

0.33130118

0.33192774

0.35746942

0.37308261

0.37680061 0.3722336

0.37254614 0.359095

0.39162798 0.3981303

0.36803603

0.38733933

0.35939435

0.36629803

0.35201562

0.37059316

0.338133

0.33108807

0.33650274

0.44949188

0.35220279

0.34807299

0.42951262

0.33349975

0.34283312

0.33166249

0.32649574

0.33530928

0.34507534

0.33620118

0.32693427

0.34851813

0.360329

0.33999565

0.37004575 0.3835065

0.34859223 0.384994

0.32493053

0.37817154 0.3732254

0.35031207

0.32404035

0.35564962

0.37134896

0.33762423

0.34184696

0.38160117 0.3573311

0.32410468

0.32787637

0.37168492

0.31864853

0.32674131

0.36181764

0.3993285

0.3372774

0.34769398

0.34006503

0.33155484

0.34020705

0.36018228

0.32424661

0.38420101

0.33772166

0.36351125

0.3470639

0.40272195 0.3915753

0.35543898

0.32179437

0.33269008

0.35054751

0.38270792

0.31879631

0.33704569

0.334364

0.35939783

0.32727792

0.38637054

0.33954347

0.37616147 0.3576801

0.46004813 0.4352008

0.45243331

0.3801195

0.3226061

0.35044601 0.361501

0.36271613

0.33590417

0.34399433

0.35656633

0.35511408

0.33166849

0.32219009

0.33048054

0.32641239

0.36449827

0.35984319

0.35958715

0.35047649

0.38407867

0.32739934

0.33322831

0.35381371

0.35875656

0.35337486

0.33769173

0.32124145

0.31929489

0.33881303

0.31913411

0.32115906

0.41896349 0.3925239

0.35067326

0.34162156 0.3619999

0.35372461

0.4230704 0.3829024

0.35892509

0.32298623

0.38215647

0.32726798

0.43559503 0.4309874

0.38628586

0.37798474

0.34883343

0.37734865

0.33801541

0.35987652

0.36758931

0.36454755

0.36640367

0.35376965

0.39376173 0.3999004

0.31871883

0.38868896 0.3734621

0.35402165

0.36291817 0.3879123

0.32626675

0.35940312

0.35398918

0.3526353

0.33182941

0.36382768

0.33413038

0.36349693

0.38148219 0.3645783

0.40077429 0.3700833

0.33114143

0.38602777

0.3335018

0.33397587

0.37895761

0.34257131

0.36279894

0.3452843

0.40332206

0.35403897

0.3538008

0.32307658

0.3590648

0.35691402

0.36780661

0.33561185

0.33179015

0.32509907

0.3530109

0.32571407

0.37948409

0.39706194

0.3636863

0.35281926

0.36372816

0.3644613 0.4010492

0.35962689

0.3433208

0.35857087

0.358168

0.36880798

0.3397318

0.38558649 0.3831412

0.33875463

0.33616113

0.32247076

0.3498812

0.33323917

0.32071946

0.31833542

0.36822896

0.36494525

0.32369636

0.34103389

0.32104075

0.33949571

0.36003173

0.32480503

0.32150009

0.35337314

0.33165902

0.34412151

0.36577462

0.34642991

0.35114465 0.3578191

0.31969746

0.32677683

0.31867669

0.37039362

0.32479191

0.32340305

0.35167038

0.35790421

0.32728255

0.32691409

0.34221312 0.3960428

0.37060166

0.37269057

0.36984634 0.3622224

0.32195733

0.38406055

0.37400927

0.33526045

0.35427987 0.3738969

0.35454663

0.35300992 0.3872233

0.41715376 0.3944063

0.32759098

0.3609722

0.35333587

0.40167443 0.402897

0.33584397

0.35820059

0.33125814

0.31979956

0.35455307

0.32124741

0.34805207

0.40047657 0.3833216

0.35345504

0.35936841

0.33264895

0.44051042

0.33615143

0.39224223

0.40497175 0.3700137

0.33743015

0.35169126

0.3571111

0.34483096

0.32532661

0.32393625

0.35352361

0.3227215

0.34874491

0.36941972

0.32056118

0.3590115

0.33640352

0.37755687 0.363841

0.34365249

0.33387484

0.3773761

0.31843577 0.3608068

0.4505943

0.4075569

0.408024

0.4142392

0.4684856

0.4504301

0.3706802

0.4028199

0.4340972

0.3839655

0.4612109

0.4162237

0.3845966

0.32237672 0.4392838

0.3709872

0.4125981

0.4012283

0.3756491

0.4231519

0.3596416

0.4584913

0.3585023

0.3587248

0.3711917

0.4336865

0.33176784

0.3721956

0.3519696 0.4257646  
0.424274

0.4746547  
0.3824369

0.3767666  
0.4108278

0.3574837

0.4520149  
0.476253  
0.3757636

0.3722373

0.3730665  
0.4058774

0.3831143  
0.3780849  
0.3778338

0.31879749 0.3591522

0.3726377

0.3788902

0.3951996

0.3582606

0.369124

0.3994353

0.3965694

0.34118674 0.3683497

0.4699879

0.4037327

0.37025

0.3744208

0.4368431

0.3220479 0.3725171

0.3713254

0.4095738

0.4741632

0.4614985

0.3892586

0.3659323

0.4030969

0.3587389

0.3795173

0.4249039

0.3738022

0.359427

0.4121154

0.4556444

0.3866016

0.34959939 0.3779509

0.3785464

0.454103

0.3837512

0.4344097

0.4353117

0.3839374

0.4095272

0.4129172

0.4412793

0.4474466

0.474222

0.4033

0.3705049

0.4477638

0.3571396

0.3775595

0.3880449

0.3599362

0.387099

0.4661133

0.3867291

0.3939089

0.36987645 0.4505974

0.387391

0.4531888

0.3875291

0.32878933 0.3760932

0.3621856

0.3785691

0.4586311

0.3583054

0.3684426

0.3675123

0.4004942

0.3861131

0.3587095

0.4092135

0.3585039

0.3681353

0.3949867

0.3695617

0.3720899

0.3641285

0.3829037

0.3668039

0.379104 0.4450064

0.4856607

0.3659201

0.3624707

0.5349046

0.4386453

0.3982991

0.4149183

0.4628097

0.3843876

0.3721572

0.32785741 0.3734324

0.3811574

0.3972039

0.32343232 0.3913884

0.3812288

0.3577571

0.3677554

0.3814706

0.397341

0.3816138

0.4056728

0.3789318

0.4158256

0.4118059

0.3603694

0.3688092

0.5346686

0.508053

0.3752242

0.3793749

0.3695766

0.4205844

0.3647567

0.4252846

0.3786951

0.3795174

0.3654972

0.3750968

0.4743082

0.4261179

0.3606019

0.3737811

0.4423195

0.445136

0.4405091

0.3952301

0.398365

0.4641613

0.3788454

0.3634265

0.5522795

0.4457148

0.3794034

0.3367795 0.3771439

0.3589001

0.3881001

0.4102008

0.3766322

0.36568888 0.4164832

0.4089571

0.3936102

0.455112

0.3819029

0.4293228

0.4314743

0.3812899

0.3723911

0.3654853

0.3856496

0.358463

0.4142779

0.4099307

0.3853213

0.476775

0.5173612

0.3607387

0.3587864

0.4021851

0.4062207

0.3880092

0.390486

0.3691754

0.3978251

0.3640982

0.32023593

0.4761121

0.3714097

0.417361

0.3994925

0.3859713

0.364956

0.4028875

0.3716514

0.3582751

0.3929021

0.4292142

0.3572727

0.3966953

0.3712832

0.35606833 0.387131

0.4581705

0.4116307

0.4335569

0.3998401

0.3800724

0.4396313

0.4258358

0.3596314

0.33544455 0.3998061

0.3842028

0.3707773

0.4272031

0.4201345

0.33275394

0.394438

0.4120676

0.3849154

0.3841276

0.3623994

0.4718937

0.5024169

0.4107946

0.32603626 0.3607549

0.3590539

0.34028355 0.3714512

0.3707776

0.4184108

0.3601304

0.4772969

0.3768057

0.3998505

0.4936405

0.3854734

0.32218447

0.4059219

0.34191717 0.4345605

0.5229091

0.369744

0.3685778

0.4494981

0.5028161

0.3694468

0.4373361

0.367187

0.3909684

0.3893117

0.3736906

0.3702796

0.382634

0.4406866

0.3743642

0.4131507

0.3762859

0.32169628 0.4041535

0.3659708

0.4202545

0.3752411

0.383838

0.4338988

0.3920437

0.4857921

0.4205798

0.4540501

0.4558795

0.434048

0.3796102

0.3994174

0.3600468

0.3619279

0.3780973

0.35284568 0.4000141

0.4541806

0.4018873  
0.4370449

0.3809643

0.4374738

0.4199377  
0.3574837

0.3796323  
0.3581847

0.3596398

0.3831178  
0.4050401

0.32026963 0.3580282

0.3815005

0.3687112

0.32813207 0.3832261  
0.4126727

0.4004629

0.3777965

0.4105342

0.3600389

0.4033995

0.3761601

0.4086135

0.394842

0.428644

0.4380621

0.3741791

0.3886793

0.3899358

0.3901936

0.4195977

0.3651712

0.3939624

0.3622295

0.4904431

0.412951

0.5278452

0.3578002

0.4008595

[Redacted]

[Redacted]

[Redacted]

[Redacted]

[Redacted]

0.3663597

[Redacted]

[Redacted]

[Redacted]

[Redacted]

0.5075165

[Redacted]

0.393914

0.3756626

0.4031726

0.3796568

[Redacted]

[Redacted]

[Redacted]

[Redacted]

[Redacted]

0.34141827 0.4098305

0.3711177

0.32066014

0.3842203

[Redacted]

[Redacted]

0.3774786

0.3735762

0.36294717 0.461577

0.370327

0.4230313

0.3784608

0.34311438 0.4288809

0.33285073

0.402905

0.4442782

0.4122032

0.34475051 0.4100565

0.440976

0.3766047

0.4490852

0.3909944

0.4580868

0.3688223

0.3971578

0.33943767 0.3823984

0.3473288 0.41275

0.3955293

0.3605279

0.344955 0.447061

0.4344508

[Redacted]

[Redacted]

0.402129

[Redacted]

0.41021

0.32947869 0.4384772

[Redacted]

0.3733013

[Redacted]

[Redacted]

[Redacted]

0.4222533

[Redacted]

0.3871847

[Redacted]

0.504183

[Redacted]

0.3893857

[Redacted]

[Redacted]

[Redacted]

0.3990253

[Redacted]

[Redacted]

0.4303413

[Redacted]

[Redacted]

0.4046504

[Redacted]

[Redacted]

[Redacted]

0.3798221

[Redacted]

0.469884

[Redacted]

0.3845857

[Redacted]

0.3757781

[Redacted]

[Redacted]

0.3583222

0.4144456

0.3594731

0.3797541

0.370549

0.4002108

0.4173618

0.5095079

0.34494145 0.4083286

0.3649845

0.34947211 0.38359

0.4368529

0.3833131

0.403821

0.3676141

0.372235

0.431589

0.4085428

0.4353709

0.363991

0.3646958

0.4027823

0.4423103

0.4110246

0.3771339

0.3993246

0.3933979

0.3717448

0.365202

0.3903819

0.3836822

0.3718541

0.4181392

0.4223994

0.35268837 0.386743

0.4288366

0.33644658

0.3882911

0.446549

0.3627827

0.3701208

0.4019487

0.31894672 0.38319

0.4239027

0.3928359

0.3745482

0.36027945 0.4380269

0.4276925

0.4177045

0.3688954

0.4000927

0.4200744

0.3677988

0.3952295

0.3815899

0.4646571

0.395151

0.4177179

0.3681695

0.32805513 0.3602464

0.3959049

0.4340841

0.3865732

0.3770794

0.4233865

0.3756512

0.4459997

0.3612012

0.4051892

0.3606878

0.3901068

0.3893297

0.4501164

0.3989085

0.4377299

0.3934669

0.411526

0.3962809

0.4369645

0.3702684

0.3662064

0.42751

0.3738172

0.3803933

0.3838079

0.3752085

0.3660907

0.4186658

0.435148

0.4397539

0.3983875

0.426828

0.4218624

0.5063418

0.3760982

0.4601289

0.3600978

0.4008943

0.3580874

0.3914851

0.4589583

0.3738568

0.446156

0.3844791

0.428062

0.4083308

0.424712

0.3612761

0.3817486

0.4691999

0.3682893

0.4039708

0.4265453

0.3765466

0.4182885

0.3951918

0.3898528

0.3992812

0.3865718

0.3764846

0.3729013

0.3926507

0.4019298

0.3854412

0.3712408

0.372526

0.33787299 0.416977

0.4360688

0.5033897

0.3711649

0.4205962

0.4290729

0.35570618 0.4200646

0.3704256

0.3853231

0.4198867

0.401877

0.4166812

0.4731542

0.4030005

0.4425089

0.4791623

0.31933064 0.3850274

0.4235512

0.4083437

0.364133

0.4654028

0.365846

0.3680386

0.400391

0.3684132

0.435443

0.4324452

0.37666

0.4950229

0.3963211

0.4071678

0.39149

0.4360912

0.3955113

0.4046847

0.37415

0.4272055

0.4667139

0.32357437 0.3659048

0.3796262

0.3754734

0.3734169

0.3841616

0.4312254

0.362313

0.4001984

0.3637682

0.4133114

0.3794613

0.4638137

0.3639338

0.3589978

0.3573334

0.3662108

0.3902268

0.33138926 0.3999228

0.4268655

0.4766614

0.4026592

0.3706793

0.4329975

0.3941413

0.438002

0.4867116

0.5096475

0.3825716

0.3949737

0.4193356

0.4392928

0.3967276

0.378473

0.4211775

0.3582707

0.3746606

0.3721113

0.3921144

0.3659745

0.4461752

0.3781475

0.457734

0.3933671

0.4353113

0.4103999

0.4076094

0.3863886

0.4192388

0.4415701

0.3351525 0.4119875

0.3602462

0.4293054

0.3713922

0.4330889

0.4050871

0.3611058

0.33005515 0.3713222

0.387768

0.4294728

0.4154376

0.4007527

0.4773181

0.3954976

0.3601878

0.3859063

0.3717222

0.4815257

0.4079944

0.3736491

0.521911

0.4135329

0.3578433

0.4031319

0.409017

0.3989202

0.3785899

0.370191

0.3629587

0.42995

0.3858473

0.3787798

0.3963754

0.4152124

0.3610215

0.3740615

0.4756379

0.4060373

0.4022449

0.362421

0.4684727

0.3707458

0.3786468

0.4334631

0.3590235

0.362133

0.3961177

0.4149251

0.3594156

0.3941389

0.3360798 0.3720038

0.3826238

0.481214

0.3688062

0.3595104

0.4128387

0.34806504 0.3618784

0.31923968

0.3687176

0.3912721

0.4285053

0.3984144

0.3775111

0.3600027

0.4128398

0.3968768

0.3752472

0.4117461

0.4219795

0.4661601

0.4001596

0.3795988

0.3989787

0.4005436

0.3831756

0.3756209

0.4282715

0.35042557 0.4088177

0.4322954

0.3723789

0.4475217

0.4546937

0.3702168

0.3603455

0.3663413

0.4723725

0.4244448

0.4580886

0.4280693

0.4087868

0.3745749

0.4288961

0.32272225 0.3734323

0.32827061 0.380698

0.3683655

0.4378649

0.33272778 0.4646862

0.4224722

0.4655501

0.3611952

0.34270704 0.3840329

0.3738741

0.397997

0.4382358

0.3754215

0.359227

0.3631355

0.3824045

0.3816358

0.3757063

0.3786262

0.5233373

0.3622394

0.31902443

0.3935026

0.3625095

0.3582656

0.3937786

0.3772355

0.4582171

0.3913688

0.4850635

0.42422

0.3872837

0.3665789

0.3921303

0.3823192

0.32408865 0.433966

0.4352314

0.4174075

0.4068317

0.417364

0.3884437

0.34166597 0.3819877

0.387963

0.4371417

0.32892981

0.4103734

0.4122055

0.38474

0.3677378

0.3795507

0.4292031

0.3689104

0.4275587

0.32170221 0.3570917

0.3325835 0.3945992

0.4307976

0.4809955

0.3990245

0.3600043

0.4572256

0.3583855

0.36979645 0.419352

0.4229738

0.37064177 0.4270325

0.3624596

0.4080498

0.3906373

0.3665133

0.3749822

---
